# Supplementary material for: Blood cells of BRCA1 mutation and epimutation carries appear to acquire specific epigenetic signatures
Source: Research Square preprint supplement (doi:10.21203/rs.3.rs-7301339/v1), 2025-08-12
Supplement: Supplementary file 1 [file 251f403368109389e6769152.xlsx]

## Sheet: Sheet1
No.	Cohort name/source/population	Time of blood drawn	Type of analysis	Time to diagnosis	Cases	Controls	Methods used to identified DMPs	Cutoff determining DMPs	Number of identified DMPs	Microarray generation	PMID
1	Sister Study	Prior BC	BC Risk	465 days (mean) range = 5-1398 days	298	612	Case–cohort proportional hazard model	q-value (FDR) < 0.05	250 DMPs	27K	PMID: 23578854
2	Sister Study	Prior BC	BC Risk	3.8 years (mean) range = 0.1-9.5 yearsª	1219	1224	Case–cohort proportional hazard model	q-value (Bonferroni) < 10-7	510 DMPs	450K	PMID: 30989176
3	Sister Study	Prior BC	BC Risk	5.2 years (mean) SD = 2.6	1551	1223	Elastic net Cox regression model run at 100 CpG sites selected from previously identified 510 CpG sites (from the second publication in this Table)	See publication	19 DMPs	450K	PMID: 34411412
4	EPIC Italy	Prior BC	BC Risk	8.9 years (mean) range = 0.04–15.7 years	162	162	conditional logistic regression	p-value < 1.2 × 10−7	26 DMPs	450K	PMID: 26244061
5	Melbourne Collaborative Cohort Study	Prior BC	BC Risk	9.5 years (median) IQR = 5.0 to 13.1 yearsᵇ	87c	123	Cox proportional hazards survival analysis method	q-value (Bonferroni) < 0.05	24 DMPs	450K	PMID: 29491469
6	Samples from Centre des maladies du sein du CHU de Québec	Prior BC	BC Risk	6.0 ± 1.6 years (mean)	6	6	Robust linear model	q-value (FDR) ≤0.05	59 DMPs	450K	PMID: 33113958
7	EPIC Italy	Prior BC	BC Risk	5.361 years (mean) range = 0.044 – 14.136 yearsᵈ	233	340	t-test and |Δβ|	p-value < 0.05 and |Δβ| > 0.015	91 common DMPse	450K	PMID: 35223499
	Melbourne Collaborative Cohort Study	Prior BC	BC Risk	9.5 years (median) IQR = 5.0 to 13.1 yearsᵇ	87c	123
8	European population	At BC	BC Risk	-	122977	105 974	prediction of methylation level from genetic data (SNPs)	q-value (Bonferroni) < 7.94 x 10–7	450 DMPs	based on 450K	PMID: 31143935
9	Uruguayan population	At BC	BC associated DMPs	-	22	10	Wilcoxon rank sum test and then generalized linear regression models including age, genetic ancestry, smoking status, and cellular heterogeneity as covariables	q-value (FDR) < 0.05 and then adjusted for covariates p-value < 0.05	38 DMPs	450K	PMID: 33145876
10	Chinese populationf	At BC	BC associated DMPs	-	50	30	Linear regression implemented in ChAMP DMP function and |Δβ|	|Δβ| ≥ 0.06 and p-value ≤ 0.01	289 DMPs	EPIC	PMID: 37550304
a This time to diagnosis was for 1552 cases including those with invasive breast cancer and ductal carcinoma in situ (DCIS); in article time to diagnosis was not reported for 1219 analyzed samples
b This time to diagnosis is for 433 invasive BC cases; in article time to diagnosis was not reported for 87 analyzed samples
c Two thirds of the cases had blood collected at breast cancer diagnosis
d Not reported in article; calculated based on publicly available data
e This number of DMPs resulted from analysis of only immune-related genes
f PBMC samples
IQR – interquartile range
