# Supplementary material for: Blood cells of BRCA1 mutation and epimutation carries appear to acquire specific epigenetic signatures
Source: Research Square preprint supplement (doi:10.21203/rs.3.rs-7301339/v1), 2025-08-12
Supplement: Supplementary file 2 [file 46cbefbb875f77ec3562bf53.docx]

Supplementary material for

**Blood cells of *BRCA1* mutation and epimutation carries appear to acquire specific epigenetic signatures**

Katarzyna Ewa Sokolowska1, Jacek Antoniewski1, Marta Sobalska-Kwapis2, Dominik Strapagiel2, Jan Lubiński3, Tomasz Huzarski3, Tomasz Kazimierz Wojdacz1#

1 Independent Clinical Epigenetics Laboratory, Pomeranian Medical University, Unii Lubelskiej 1, 71-252 Szczecin, Poland.

2 Centre for Digital Biology and Biomedical Science - Biobank Lodz®, Faculty of Biology and Environmental Protection, University of Lodz, Pomorska 139 St., 90-235 Lodz, Poland

3 Department of Genetics and Pathology, International Hereditary Cancer Center, Pomeranian Medical University, Unii Lubelskiej 1, 71-252 Szczecin, Poland.

#Corresponding author: Tomasz Kazimierz Wojdacz

e-mail: [tomasz.wojdacz@pum.edu.pl](mailto:tomasz.wojdacz@pum.edu.pl)


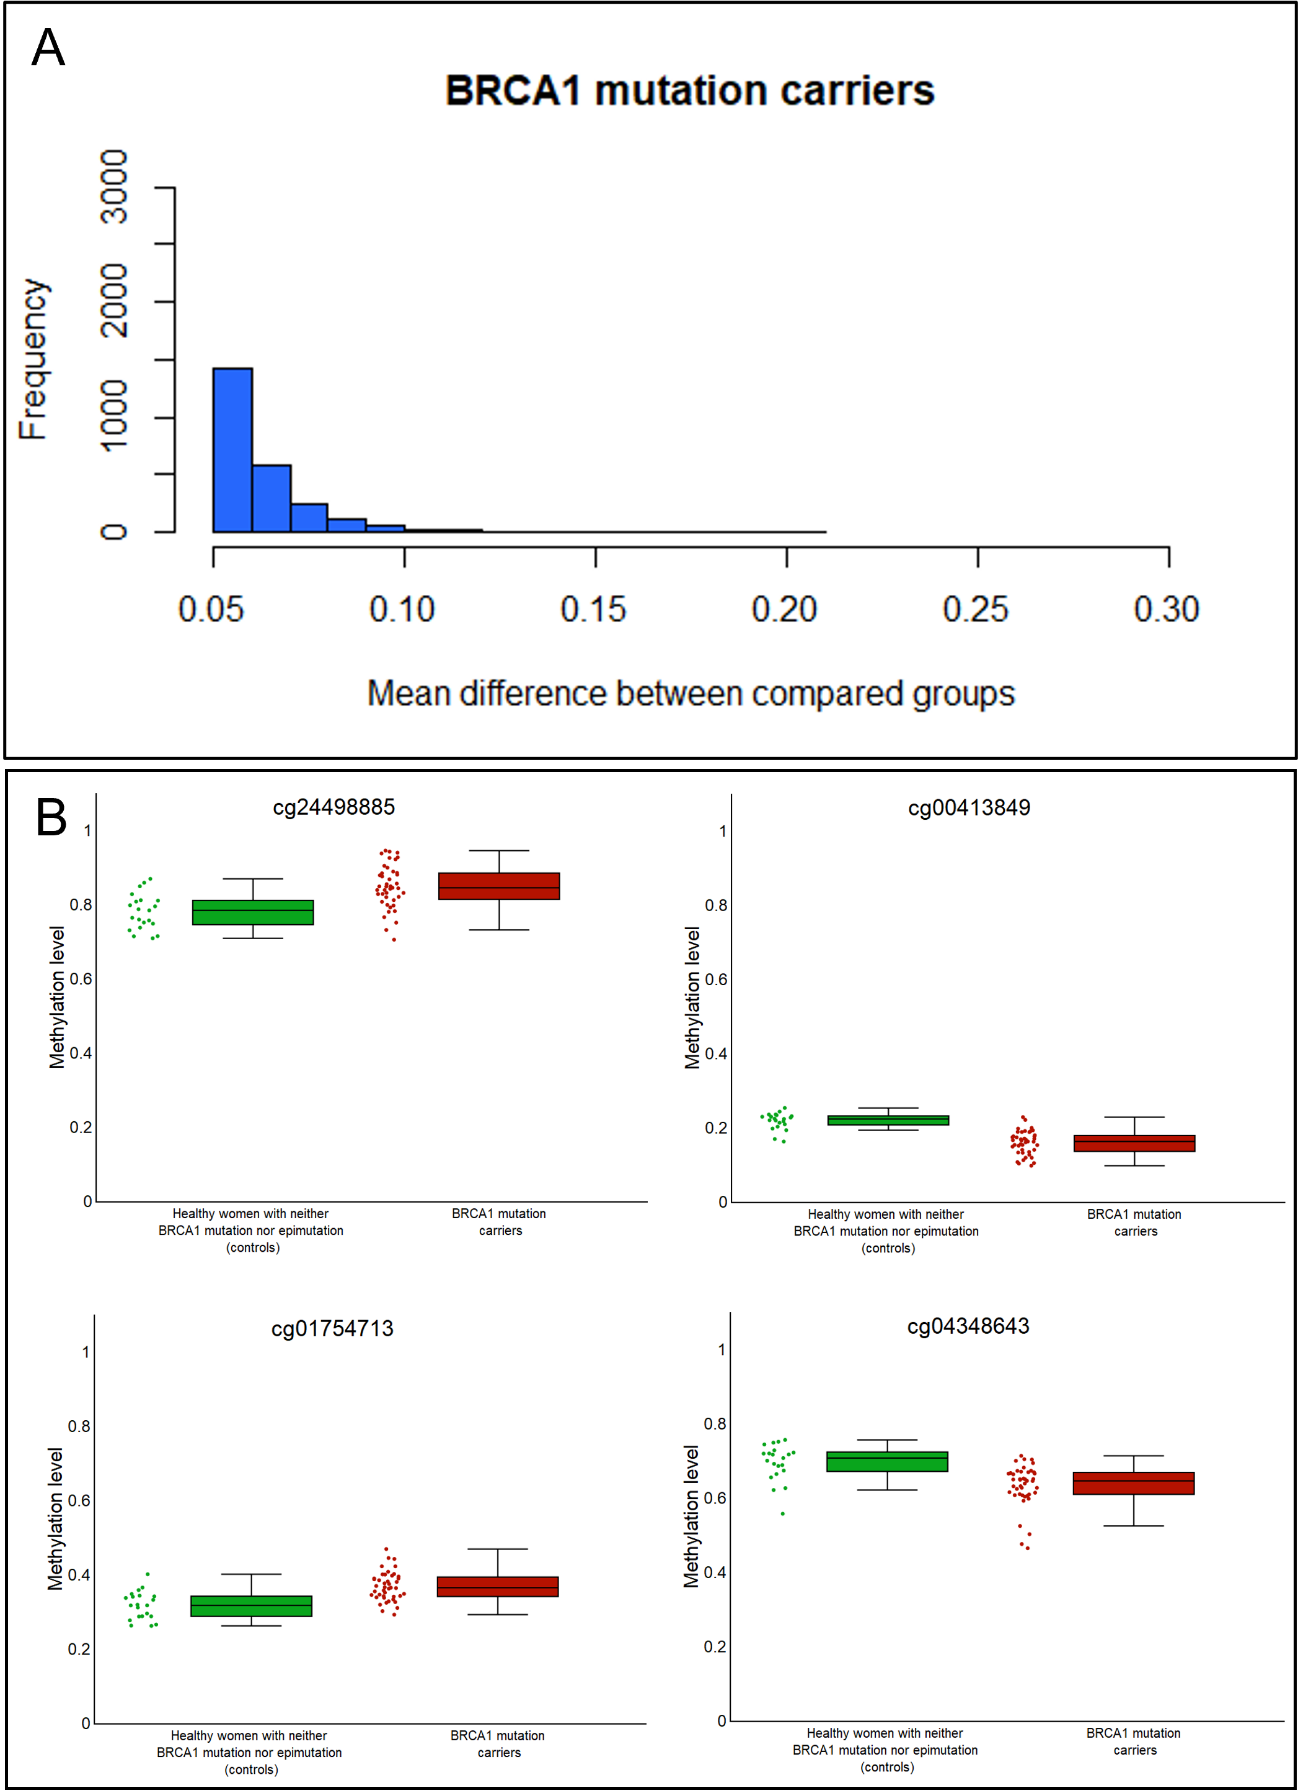


Figure S1. Analyses performed for BRCA1 mutation carriers A) Histogram represents the frequency of DMP identified for this cohorts, B) Boxplots showing four example DMPs


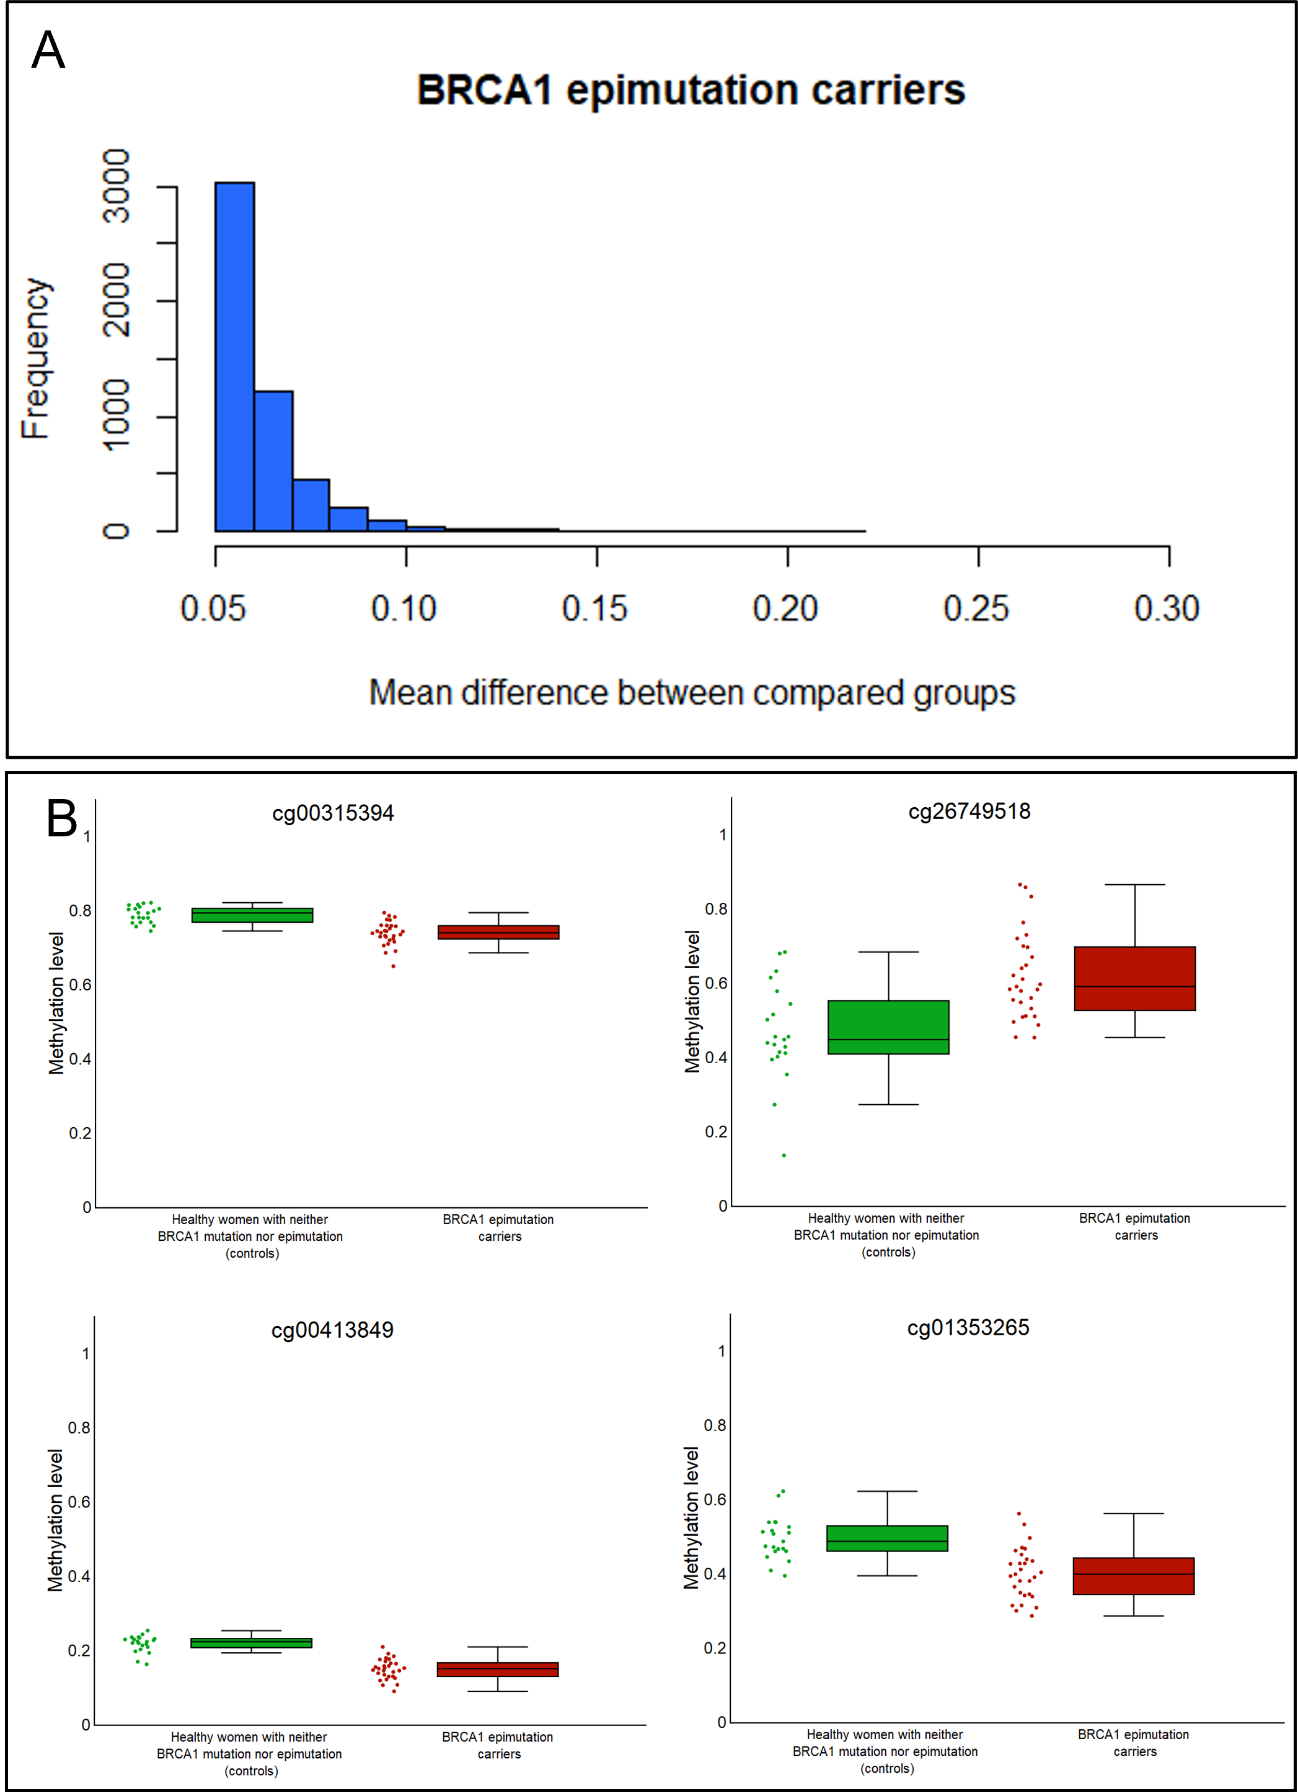


Figure S2. Analyses performed for BRCA1 epimutation carriers A) Histogram represents the frequency of DMP identified for this cohorts, B) Boxplots showing four example DMPs


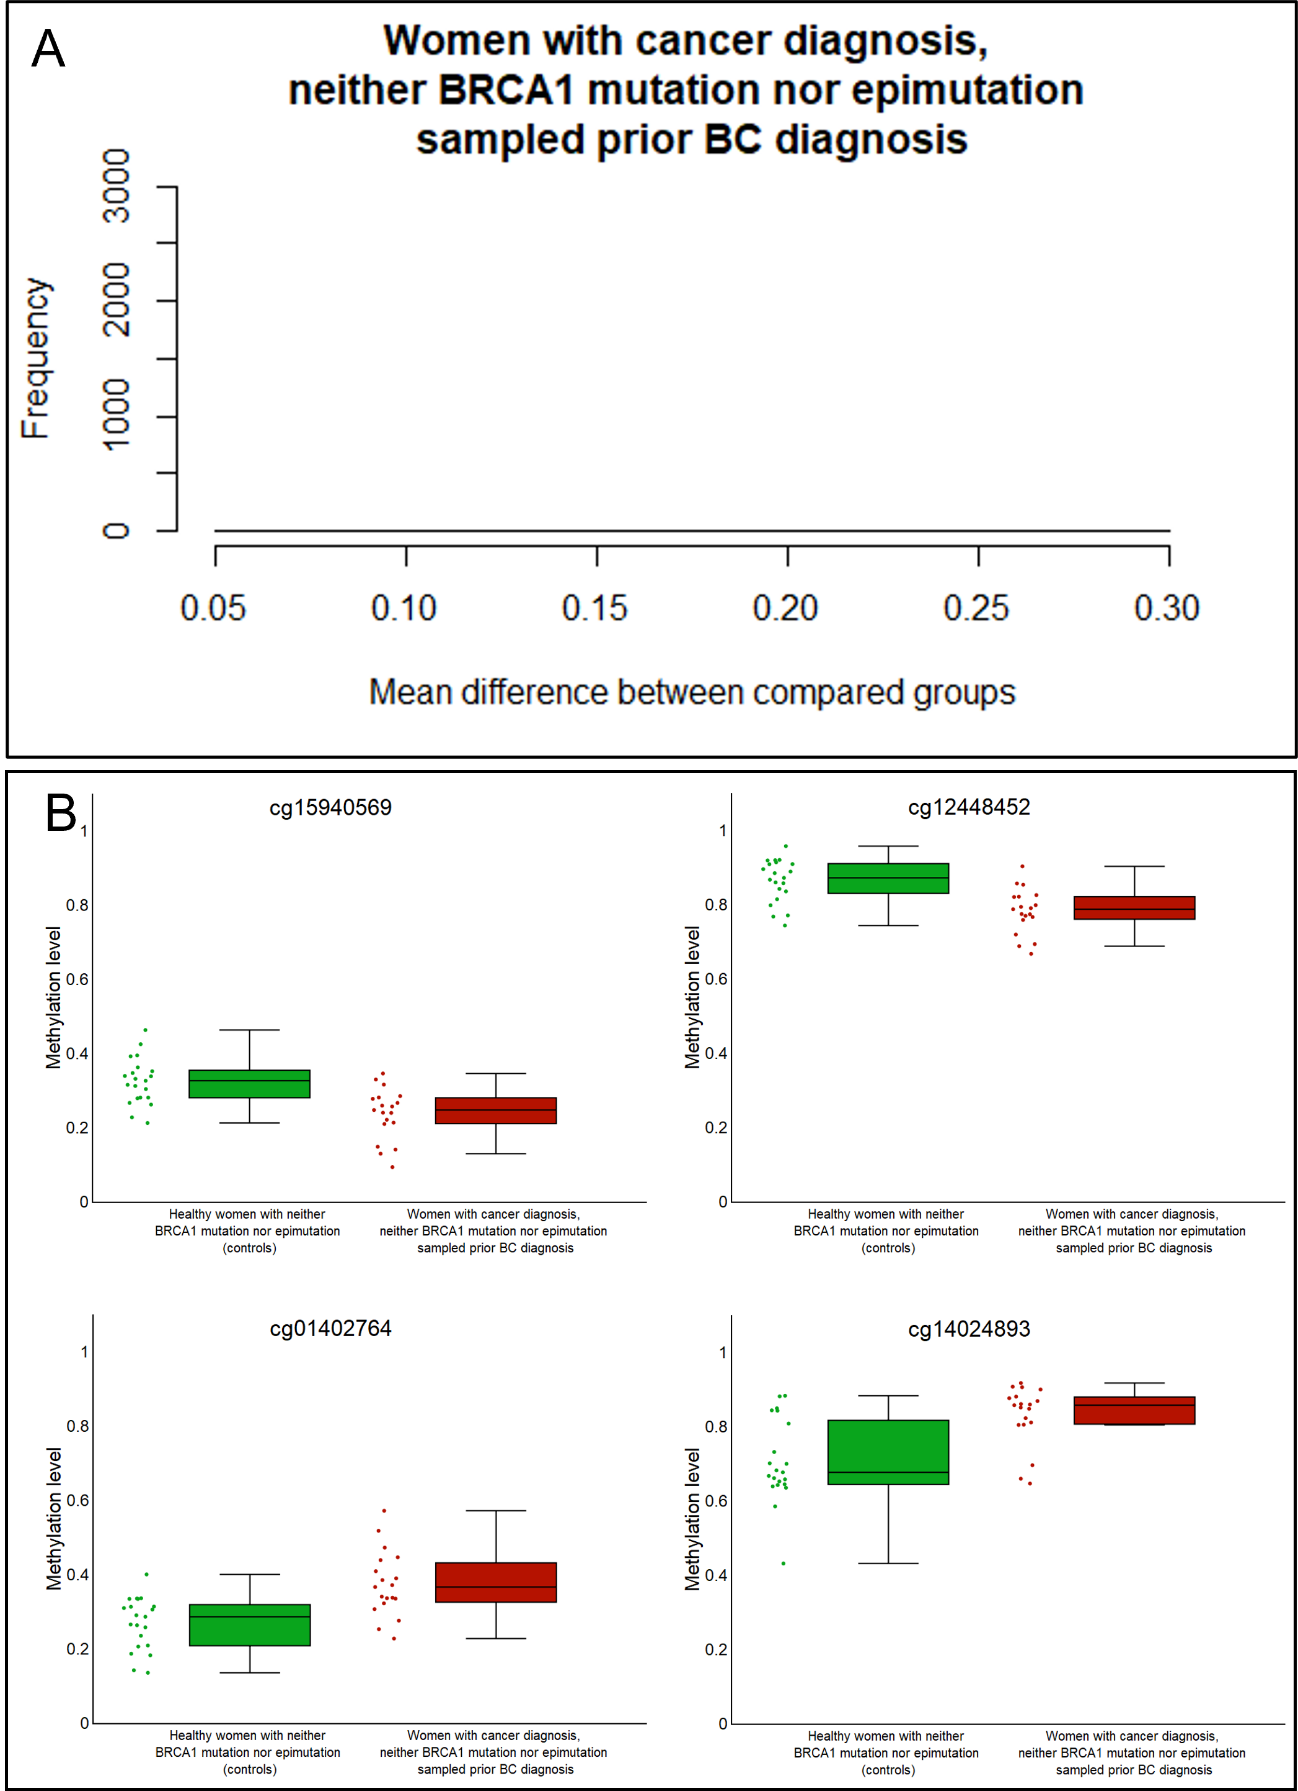


Figure S3. Analyses performed for women with cancer diagnosis, neither BRCA1 mutation nor epimutation sampled prior BC diagnosis A) Histogram represents the frequency of DMP identified for this cohorts, B) Boxplots showing four example DMPs


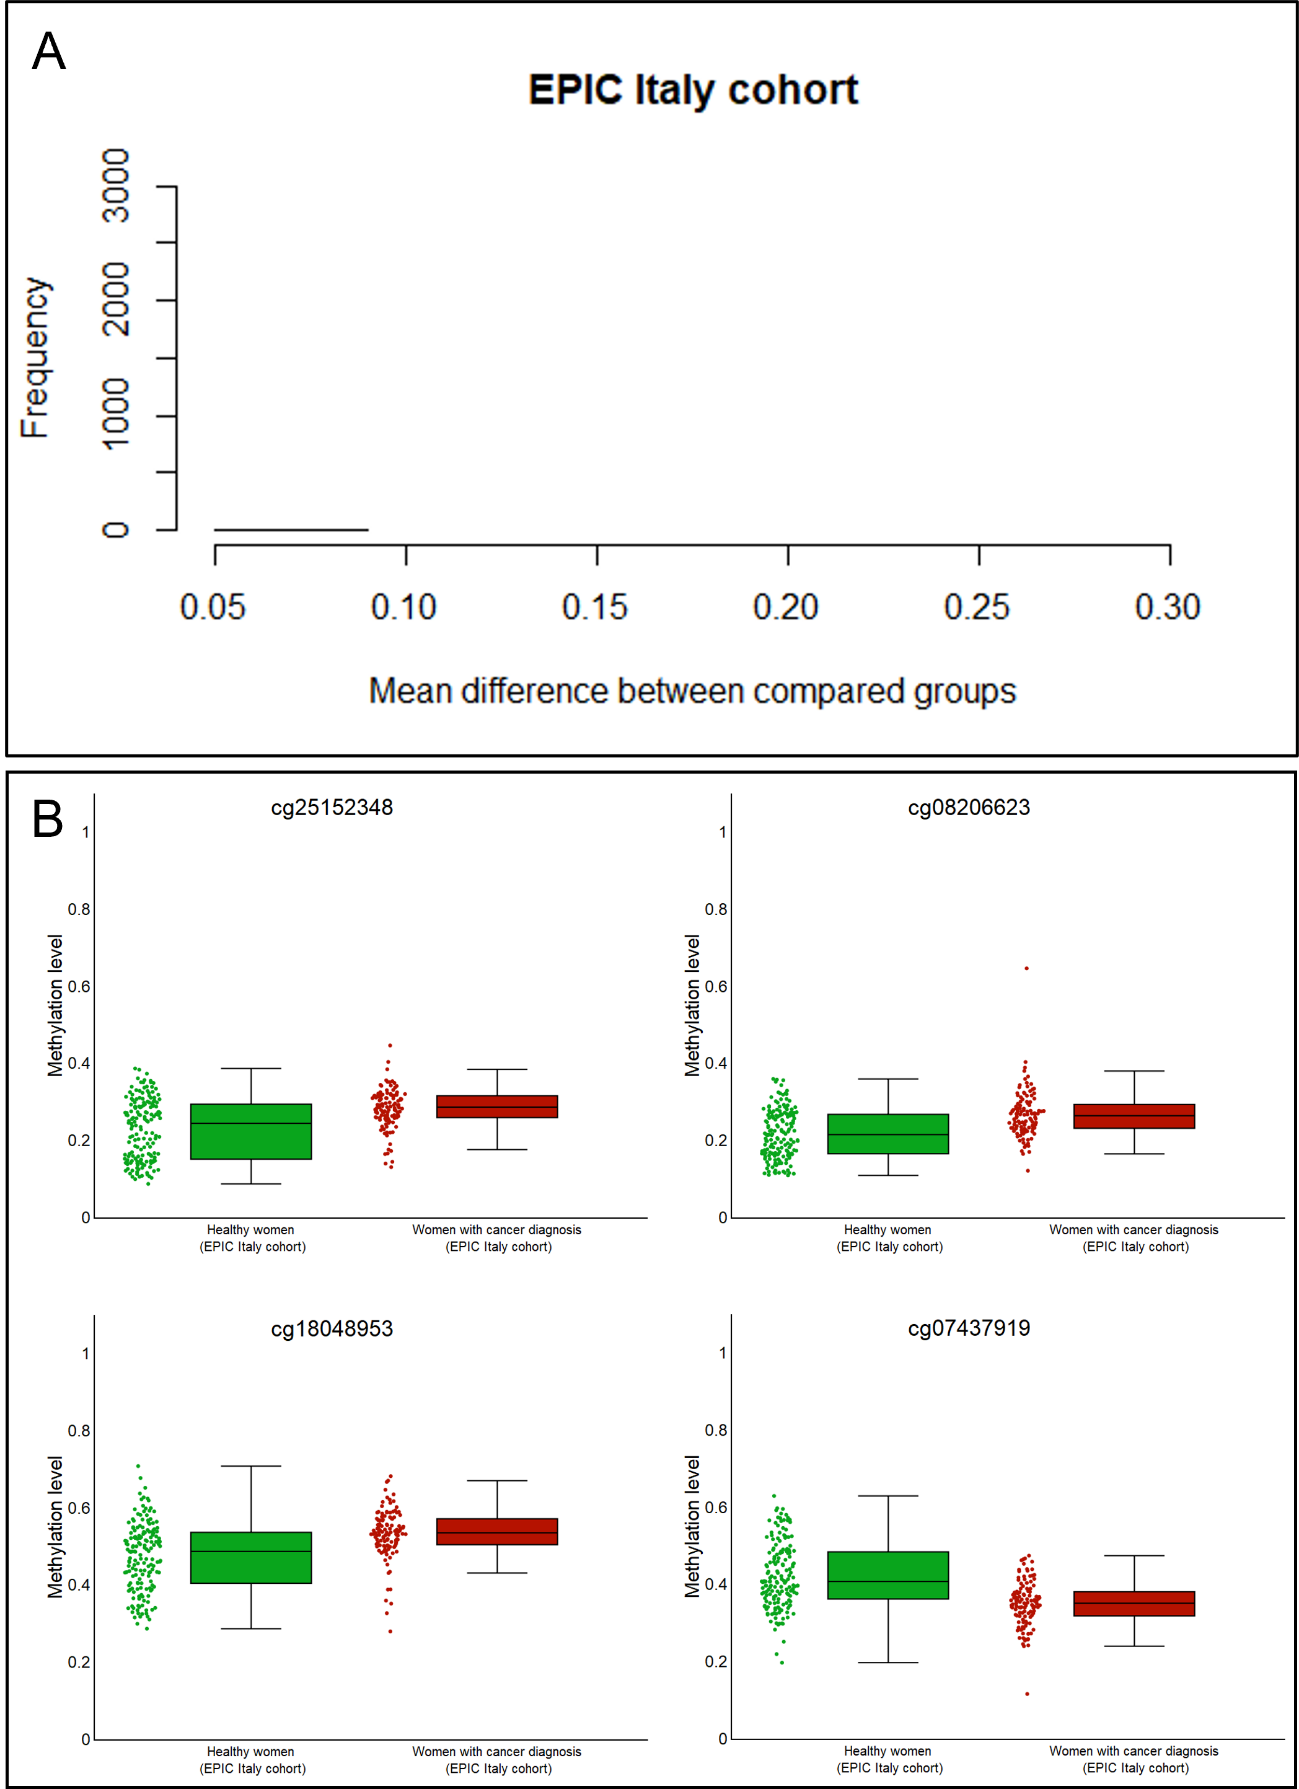


Figure S4. Analyses performed for EPIC Italy cohort A) Histogram represents the frequency of DMP identified for this cohorts, B) Boxplots showing four example DMPs
