# Supplementary material for: Blood cells of BRCA1 mutation and epimutation carries appear to acquire specific epigenetic signatures
Source: Research Square preprint supplement (doi:10.21203/rs.3.rs-7301339/v1), 2025-08-12
Supplement: Supplementary file 3 [file 779e5affe9ad2e05b1d45c0c.xlsx]

## Sheet: Info
Table	Description
Supplementary Table 1	DMPs identified for women prior breast cancer diagnosis with neither BRCA1 germline mutation nor epimutation (Polish cohort)
Supplementary Table 2	DMPs identified for women prior breast cancer diagnosis with neither BRCA1 germline mutation nor epimutation (EPIC Italy cohort)
Supplementary Table 3	DMPs identified for BRCA1 germline mutation carriers (Polish cohort)
Supplementary Table 4	DMPs identified for BRCA1 epimutation carriers (Polish cohort)
Supplementary Table 5	Common DMPs for BRCA1 germline mutation and epimutation carriers (Polish cohort)
Headers	Description
CpG	CpG sites
controls_PL_AVG	The average DNA methylation levels measured at specific CpG site within controls (Polish cohort)
controls_EPIC_Italy_AVG	The average DNA methylation levels measured at specific CpG site within controls (EPIC Italy cohort)
cases_PL_AVG	The average DNA methylation levels measured at specific CpG site within cases (women prior breast cancer diagnosis with neither BRCA1 germline mutation nor epimutation (Polish cohort))
cases_EPIC_Italy_AVG	The average DNA methylation levels measured at specific CpG site within cases (women prior breast cancer diagnosis with neither BRCA1 germline mutation nor epimutation (EPIC Italy cohort))
cases_PL_BRCA1_mut_AVG	The average DNA methylation levels measured at specific CpG site within cases (BRCA1 germline mutation carriers; Polish cohort)
cases_PL_BRCA1_epimut_AVG	The average DNA methylation levels measured at specific CpG site within cases (BRCA1 epimutation carriers; Polish cohort)
deltaBeta	The difference in averages between controls and cases
deltaBeta_BRCA1_mut	The difference in averages between controls and cases (BRCA1 germline mutation carriers; Polish cohort)
deltaBeta_BRCA1_epimut	The difference in averages between controls and cases (BRCA1 epimutation carriers; Polish cohort)
DNA_methylation_status	The direction of DNA methylation level change in cases in comparison to controls
DNA_methylation_status_BRCA1_mut	The direction of DNA methylation level change in cases (BRCA1 germline mutation carriers; Polish cohort) in comparison to controls
DNA_methylation_status_BRCA1_epimut	The direction of DNA methylation level change in cases (BRCA1 epimutation carriers; Polish cohort) in comparison to controls
P.Value	Linear model P-value
adj.P.Val	Ajdusted p-value (Benjamini-Hochberg (FDR))
P.Value_BRCA1_mut	Linear model P-value for the comparison of BRCA1 mutation carriers vs. controls
adj.P.Val_BRCA1_mut	Ajdusted p-value (Benjamini-Hochberg (FDR)) for the comparison of BRCA1 mutation carriers vs. controls
P.Value_BRCA1_epimut	Linear model P-value for the comparison of BRCA1 epimutation carriers vs. controls
adj.P.Val_BRCA1_epimut	Ajdusted p-value (Benjamini-Hochberg (FDR)) for the comparison of BRCA1 epimutation carriers vs. Controls

## Sheet: Supplementary Table 1
CpG	controls_PL_AVG	cases_PL_AVG	deltaBeta	DNA_methylation_status	P.Value	adj.P.Val
cg01402764	0.268498	0.373639	-0.105141	hypermethylation	0.000142787	0.0456656
cg12448452	0.863816	0.782027	0.0817892	hypomethylation	0.000202156	0.0456656
cg14024893	0.705332	0.830301	-0.124969	hypermethylation	0.000157391	0.0456656
cg14120642	0.945968	0.802916	0.143052	hypomethylation	5.24762e-06	0.0129616
cg15807154	0.534227	0.445614	0.0886134	hypomethylation	0.000213304	0.0456656
cg15940569	0.32414	0.236624	0.087516	hypomethylation	0.000221857	0.0456656
cg16955800	0.3238	0.587384	-0.263584	hypermethylation	0.000120053	0.0456656
cg17111542	0.832513	0.611016	0.221497	hypomethylation	0.000171324	0.0456656
cg17981520	0.39077	0.314779	0.0759907	hypomethylation	0.000217068	0.0456656
cg19693717	0.976325	0.819194	0.157131	hypomethylation	4.53444e-05	0.0373336
cg24322628	0.924788	0.807387	0.117401	hypomethylation	0.000171921	0.0456656
cg26543192	0.930485	0.719492	0.210994	hypomethylation	1.62643e-05	0.0200864

## Sheet: Supplementary Table 2
CpG	controls_EPIC_Italy_AVG	cases_EPIC_Italy_AVG	deltaBeta	DNA_methylation_status	P.Value	adj.P.Val
cg01204305	0.410476	0.46929	-0.0588143	hypermethylation	2.62108e-10	4.7656e-10
cg01684248	0.462794	0.521818	-0.0590241	hypermethylation	1.9638e-10	3.9276e-10
cg01736133	0.760713	0.71017	0.0505431	hypomethylation	4.56461e-08	4.80485e-08
cg01775802	0.63936	0.56968	0.06968	hypomethylation	5.04411e-10	8.07058e-10
cg01994308	0.418985	0.497895	-0.0789099	hypermethylation	1.45048e-12	7.37782e-12
cg02308712	0.753852	0.691185	0.0626672	hypomethylation	4.6066e-12	1.84264e-11
cg03252499	0.386044	0.462278	-0.0762337	hypermethylation	1.54965e-10	3.26243e-10
cg04205664	0.497176	0.413486	0.0836901	hypomethylation	8.50758e-10	1.21537e-09
cg04981696	0.244921	0.307122	-0.0622012	hypermethylation	3.1162e-11	8.90342e-11
cg05367846	0.253729	0.312575	-0.058846	hypermethylation	1.30432e-09	1.58099e-09
cg07437919	0.422467	0.350027	0.0724406	hypomethylation	2.90803e-14	3.87738e-13
cg08206623	0.216652	0.266717	-0.0500657	hypermethylation	2.50543e-10	4.7656e-10
cg09036531	0.70551	0.642186	0.0633239	hypomethylation	2.88571e-15	1.15428e-13
cg09372808	0.771748	0.720764	0.0509836	hypomethylation	2.00695e-07	2.00695e-07
cg09656541	0.510006	0.433779	0.0762269	hypomethylation	1.40138e-11	5.09594e-11
cg09985739	0.820374	0.769814	0.0505599	hypomethylation	1.38453e-10	3.07674e-10
cg11057824	0.654045	0.572566	0.0814792	hypomethylation	4.41547e-09	5.04625e-09
cg11207300	0.22577	0.289531	-0.0637607	hypermethylation	1.02466e-12	7.37782e-12
cg13021192	0.215791	0.270348	-0.0545563	hypermethylation	6.64028e-10	9.83745e-10
cg13810766	0.584429	0.531726	0.0527031	hypomethylation	1.19779e-10	2.81832e-10
cg14269096	0.702295	0.64368	0.0586154	hypomethylation	4.72189e-10	7.88951e-10
cg14495033	0.673342	0.590178	0.0831642	hypomethylation	1.47556e-12	7.37782e-12
cg14733031	0.646377	0.58176	0.0646178	hypomethylation	5.90523e-08	6.05664e-08
cg15897635	0.631804	0.556432	0.0753716	hypomethylation	4.69502e-11	1.25201e-10
cg16500605	0.368461	0.449839	-0.0813773	hypermethylation	2.41152e-12	1.07179e-11
cg17479131	0.413495	0.48363	-0.0701355	hypermethylation	1.17185e-09	1.46481e-09
cg17605604	0.642928	0.566075	0.0768531	hypomethylation	1.05801e-09	1.39969e-09
cg18048953	0.473462	0.533215	-0.0597533	hypermethylation	1.08476e-09	1.39969e-09
cg19015611	0.553775	0.642233	-0.088458	hypermethylation	1.4024e-12	7.37782e-12
cg19081843	0.288572	0.34075	-0.0521784	hypermethylation	2.60308e-11	8.00948e-11
cg20001070	0.453623	0.384693	0.0689303	hypomethylation	1.34052e-13	1.34052e-12
cg21565415	0.581736	0.508317	0.0734193	hypomethylation	1.48577e-09	1.74797e-09
cg25009327	0.346195	0.273548	0.072647	hypomethylation	1.8488e-14	3.69759e-13
cg25152348	0.229006	0.282913	-0.0539075	hypermethylation	4.7337e-10	7.88951e-10
cg25627341	0.735414	0.680546	0.0548683	hypomethylation	1.11441e-10	2.78603e-10
cg25858983	0.18289	0.234592	-0.0517017	hypermethylation	1.76453e-11	5.88177e-11
cg25987208	0.367601	0.431965	-0.0643634	hypermethylation	1.01937e-09	1.39969e-09
cg27298252	0.48432	0.547678	-0.0633581	hypermethylation	5.66861e-09	6.29846e-09
cg27521571	0.79466	0.744526	0.0501333	hypomethylation	5.50283e-10	8.46589e-10

## Sheet: Supplementary Table 3
CpG	controls_PL_AVG	cases_PL_BRCA1_mut_AVG	deltaBeta	DNA_methylation_status	P.Value	adj.P.Val
cg00002444	0.697603	0.644797	-0.0528059	hypomethylation	0.00845283	0.0166064
cg00014020	0.711991	0.661763	-0.0502278	hypomethylation	0.0432889	0.0454352
cg00026909	0.311078	0.260261	-0.0508176	hypomethylation	0.00347162	0.0113825
cg00030918	0.857132	0.796269	-0.0608632	hypomethylation	0.0104093	0.0184064
cg00069003	0.718559	0.662366	-0.0561931	hypomethylation	0.0280581	0.0330952
cg00101154	0.644214	0.553103	-0.0911106	hypomethylation	0.0473715	0.0487035
cg00116583	0.825541	0.765022	-0.0605192	hypomethylation	0.0265632	0.0318228
cg00124920	0.839664	0.775241	-0.0644231	hypomethylation	0.0187832	0.0257827
cg00126412	0.455726	0.380992	-0.0747345	hypomethylation	0.00175915	0.00909497
cg00130707	0.811725	0.761273	-0.0504519	hypomethylation	0.00459514	0.0123427
cg00139234	0.846703	0.790144	-0.0565596	hypomethylation	0.018886	0.0258824
cg00174294	0.6163	0.557164	-0.059136	hypomethylation	0.0324871	0.0366911
cg00177239	0.340718	0.288132	-0.0525865	hypomethylation	0.00488578	0.0126887
cg00193283	0.522646	0.574294	0.0516476	hypermethylation	0.000268712	0.0050594
cg00208967	0.281782	0.231161	-0.0506215	hypomethylation	0.0007825	0.0069826
cg00215587	0.822447	0.880341	0.0578941	hypermethylation	0.00367915	0.0114567
cg00216680	0.0301608	0.0902051	0.0600443	hypermethylation	0.0407401	0.0434068
cg00219169	0.461742	0.545038	0.083296	hypermethylation	0.0107709	0.0186721
cg00227341	0.819226	0.766346	-0.0528803	hypomethylation	0.0189611	0.0259275
cg00268953	0.515577	0.572645	0.0570679	hypermethylation	0.000119728	0.00373321
cg00275896	0.72805	0.661486	-0.0665636	hypomethylation	0.0112908	0.0191057
cg00282877	0.621559	0.566291	-0.0552677	hypomethylation	0.00580087	0.0137292
cg00301120	0.400673	0.301928	-0.0987455	hypomethylation	0.00100862	0.00752456
cg00310386	0.39249	0.325184	-0.0673067	hypomethylation	0.00113072	0.00779452
cg00336022	0.856004	0.799365	-0.056638	hypomethylation	0.0452552	0.0469872
cg00363750	0.549034	0.485971	-0.0630636	hypomethylation	0.000939644	0.00749388
cg00375389	0.894591	0.840254	-0.0543374	hypomethylation	0.00316187	0.010812
cg00389547	0.715748	0.767362	0.0516147	hypermethylation	0.00533997	0.0132412
cg00413089	0.370432	0.293384	-0.0770482	hypomethylation	0.0376906	0.0409708
cg00413849	0.217569	0.159137	-0.0584326	hypomethylation	2.35792e-07	0.000187599
cg00414890	0.661257	0.71961	0.0583529	hypermethylation	0.0135373	0.0209537
cg00418160	0.873535	0.821693	-0.0518423	hypomethylation	0.00423724	0.0120039
cg00419321	0.279693	0.206836	-0.0728563	hypomethylation	0.00306661	0.0107759
cg00445187	0.483848	0.425078	-0.0587696	hypomethylation	0.0258335	0.0313218
cg00457450	0.727482	0.81524	0.0877579	hypermethylation	0.00212421	0.00964534
cg00466209	0.739148	0.688933	-0.0502149	hypomethylation	0.0101376	0.0181014
cg00478710	0.627285	0.575394	-0.0518913	hypomethylation	0.009001	0.0171652
cg00485232	0.232259	0.176677	-0.0555817	hypomethylation	0.00475853	0.012493
cg00497232	0.159694	0.232143	0.0724489	hypermethylation	0.00180398	0.00914889
cg00499657	0.369003	0.318173	-0.0508304	hypomethylation	0.000136132	0.00390076
cg00504075	0.719466	0.663264	-0.0562022	hypomethylation	0.0103882	0.0183926
cg00507497	0.519075	0.461319	-0.0577553	hypomethylation	6.96158e-05	0.0032687
cg00520378	0.427163	0.367485	-0.0596779	hypomethylation	0.0437072	0.0457565
cg00523225	0.246265	0.162727	-0.0835378	hypomethylation	5.82876e-05	0.00318099
cg00530438	0.528085	0.465638	-0.0624476	hypomethylation	0.0222158	0.0285639
cg00569896	0.549004	0.477406	-0.0715977	hypomethylation	0.00655943	0.0144537
cg00586123	0.253186	0.202063	-0.0511228	hypomethylation	0.00096201	0.00752456
cg00590260	0.484332	0.568433	0.0841006	hypermethylation	0.00183237	0.00915462
cg00593116	0.593492	0.541109	-0.0523833	hypomethylation	0.0152887	0.0226503
cg00601035	0.80797	0.756431	-0.0515386	hypomethylation	0.0376796	0.0409708
cg00606190	0.501317	0.426251	-0.0750663	hypomethylation	0.00126087	0.00811527
cg00610991	0.460308	0.397266	-0.0630416	hypomethylation	0.00215073	0.00970716
cg00615271	0.350028	0.290446	-0.0595826	hypomethylation	0.00628479	0.0141829
cg00618711	0.607825	0.556278	-0.0515478	hypomethylation	0.00383201	0.0116064
cg00622128	0.56232	0.49531	-0.0670104	hypomethylation	0.000855843	0.00717461
cg00642460	0.235172	0.296164	0.0609919	hypermethylation	0.00338678	0.011203
cg00643296	0.370173	0.315602	-0.0545719	hypomethylation	0.00347742	0.0113825
cg00658413	0.347125	0.296159	-0.0509654	hypomethylation	0.00186368	0.00925601
cg00693915	0.862025	0.79535	-0.0666745	hypomethylation	0.00251895	0.00995302
cg00698060	0.767049	0.70773	-0.0593192	hypomethylation	0.00643969	0.0143148
cg00711090	0.280064	0.203764	-0.0763004	hypomethylation	0.000655813	0.00665674
cg00720689	0.855094	0.803242	-0.0518526	hypomethylation	0.015535	0.0228407
cg00767573	0.725647	0.674593	-0.0510541	hypomethylation	0.00916997	0.0173395
cg00767581	0.272335	0.222003	-0.0503324	hypomethylation	0.00860003	0.0167293
cg00774005	0.299641	0.241502	-0.0581394	hypomethylation	0.00627048	0.0141826
cg00774077	0.651005	0.705356	0.0543507	hypermethylation	0.00582227	0.0137292
cg00793088	0.456812	0.406615	-0.050197	hypomethylation	0.049008	0.0499989
cg00795900	0.259594	0.316073	0.0564788	hypermethylation	0.0019936	0.00945841
cg00796424	0.350604	0.295198	-0.0554066	hypomethylation	0.0435282	0.045607
cg00807197	0.374861	0.309475	-0.0653863	hypomethylation	0.0104312	0.0184064
cg00809147	0.584142	0.534017	-0.0501247	hypomethylation	0.00274408	0.0104042
cg00815399	0.353664	0.275176	-0.0784882	hypomethylation	0.0252046	0.0308284
cg00824944	0.770851	0.693671	-0.07718	hypomethylation	0.0154395	0.022781
cg00828744	0.685055	0.631345	-0.0537101	hypomethylation	0.0184889	0.0254167
cg00830121	0.914683	0.861545	-0.053138	hypomethylation	0.00190062	0.00929705
cg00871487	0.68992	0.747658	0.0577382	hypermethylation	0.0294298	0.0342488
cg00890249	0.848728	0.788359	-0.0603686	hypomethylation	0.0026082	0.0101083
cg00912518	0.743462	0.645825	-0.0976372	hypomethylation	0.0262545	0.0316182
cg00955254	0.507551	0.456394	-0.0511569	hypomethylation	0.0288806	0.033785
cg00956549	0.284552	0.207793	-0.0767594	hypomethylation	0.0029251	0.0106035
cg00964035	0.452079	0.376579	-0.0754999	hypomethylation	0.0408778	0.0435167
cg00976692	0.166941	0.112684	-0.0542575	hypomethylation	0.00244185	0.00995302
cg00983740	0.770259	0.828003	0.0577439	hypermethylation	0.0224011	0.0287006
cg00985247	0.76187	0.708402	-0.0534679	hypomethylation	0.00146073	0.00849176
cg00991861	0.677311	0.625142	-0.0521699	hypomethylation	0.00973406	0.0177129
cg01002284	0.220684	0.16346	-0.057224	hypomethylation	0.00412047	0.0118811
cg01005080	0.431523	0.373832	-0.0576912	hypomethylation	0.0124534	0.0200382
cg01016191	0.403587	0.469162	0.0655753	hypermethylation	0.00262755	0.0101238
cg01026009	0.37199	0.321444	-0.0505466	hypomethylation	0.0458424	0.0474991
cg01050736	0.800963	0.748421	-0.0525422	hypomethylation	0.009213	0.0173855
cg01071808	0.621337	0.554824	-0.0665128	hypomethylation	0.00626835	0.0141826
cg01074613	0.894259	0.81471	-0.0795497	hypomethylation	3.00468e-05	0.00252693
cg01076129	0.739432	0.686789	-0.0526431	hypomethylation	0.0431468	0.0453392
cg01076861	0.843439	0.779695	-0.0637434	hypomethylation	0.00057447	0.00649513
cg01079407	0.693353	0.747628	0.0542741	hypermethylation	0.00426225	0.0120067
cg01117274	0.446161	0.394535	-0.0516268	hypomethylation	0.0134271	0.0208472
cg01119903	0.405944	0.342071	-0.0638735	hypomethylation	0.00452141	0.0123195
cg01131999	0.865858	0.784067	-0.0817913	hypomethylation	7.12558e-05	0.0032687
cg01138171	0.725098	0.776326	0.0512279	hypermethylation	0.00586014	0.0137656
cg01152688	0.720954	0.77252	0.0515665	hypermethylation	0.00975043	0.0177129
cg01152927	0.778785	0.724575	-0.0542107	hypomethylation	0.0169886	0.0242128
cg01156070	0.299723	0.246064	-0.0536586	hypomethylation	0.0111791	0.0190444
cg01157950	0.91558	0.850314	-0.0652665	hypomethylation	0.00114989	0.00783153
cg01202519	0.408554	0.464238	0.0556832	hypermethylation	0.0171751	0.0243781
cg01202976	0.883201	0.942847	0.0596465	hypermethylation	0.00882404	0.0169947
cg01206725	0.535173	0.484372	-0.0508006	hypomethylation	0.0105333	0.0184552
cg01216388	0.71844	0.66087	-0.0575698	hypomethylation	0.00473472	0.0124671
cg01217923	0.731188	0.666658	-0.0645299	hypomethylation	0.0106452	0.0185355
cg01231800	0.803816	0.751758	-0.0520581	hypomethylation	0.00457936	0.0123427
cg01232511	0.64872	0.71928	0.07056	hypermethylation	0.0115554	0.0192666
cg01255417	0.318568	0.256696	-0.0618717	hypomethylation	0.00379054	0.0115641
cg01263942	0.748862	0.802955	0.0540931	hypermethylation	0.00737655	0.0153683
cg01267709	0.650425	0.70101	0.0505847	hypermethylation	0.000494858	0.00627463
cg01271129	0.526255	0.457239	-0.0690157	hypomethylation	0.000830739	0.00708093
cg01275656	0.380453	0.320145	-0.060308	hypomethylation	0.0171157	0.0243284
cg01335710	0.940872	0.889702	-0.0511693	hypomethylation	0.00772213	0.0157693
cg01359748	0.729808	0.781998	0.0521896	hypermethylation	0.0336476	0.0375859
cg01367324	0.38057	0.314917	-0.0656527	hypomethylation	0.00370082	0.0114567
cg01392760	0.447818	0.377125	-0.0706929	hypomethylation	0.00118678	0.00792126
cg01412970	0.356896	0.444634	0.0877381	hypermethylation	0.00889873	0.0170475
cg01418618	0.779056	0.842858	0.0638017	hypermethylation	0.0294571	0.034249
cg01425746	0.726973	0.789655	0.0626817	hypermethylation	0.0138654	0.0212529
cg01427108	0.782391	0.58395	-0.198441	hypomethylation	0.00183076	0.00915462
cg01427130	0.690371	0.750156	0.0597854	hypermethylation	0.00289547	0.0105814
cg01470356	0.516009	0.461815	-0.0541942	hypomethylation	0.0391525	0.0421065
cg01508988	0.359908	0.295561	-0.0643469	hypomethylation	0.000128621	0.00382281
cg01511514	0.884464	0.809412	-0.0750522	hypomethylation	1.22481e-05	0.00242755
cg01518259	0.695211	0.643945	-0.0512658	hypomethylation	0.0291801	0.034021
cg01529864	0.536242	0.485282	-0.0509599	hypomethylation	0.0118679	0.0195194
cg01533966	0.63107	0.562269	-0.0688013	hypomethylation	0.000808968	0.00705896
cg01537722	0.225523	0.167748	-0.0577752	hypomethylation	0.00695699	0.0149529
cg01538257	0.744675	0.669867	-0.0748078	hypomethylation	0.000597451	0.00664039
cg01540595	0.61298	0.52914	-0.0838397	hypomethylation	0.0270471	0.0321506
cg01548680	0.30603	0.253305	-0.0527241	hypomethylation	0.00062837	0.00665674
cg01559901	0.615904	0.552759	-0.063145	hypomethylation	0.00303151	0.0107272
cg01575590	0.42448	0.512127	0.0876478	hypermethylation	9.18807e-05	0.00334566
cg01578839	0.555269	0.49731	-0.0579587	hypomethylation	0.0174965	0.0246103
cg01589079	0.842833	0.783674	-0.0591587	hypomethylation	0.0142303	0.0216023
cg01590338	0.471951	0.524241	0.0522896	hypermethylation	0.0127454	0.0203508
cg01607625	0.544792	0.616087	0.0712948	hypermethylation	0.00464398	0.01241
cg01612133	0.796087	0.745071	-0.051016	hypomethylation	0.0152384	0.022589
cg01617280	0.737298	0.683819	-0.0534793	hypomethylation	0.00607462	0.0139711
cg01620739	0.435131	0.384872	-0.0502589	hypomethylation	0.0350198	0.0387691
cg01632381	0.353068	0.29769	-0.0553782	hypomethylation	0.0401985	0.0429386
cg01669161	0.477636	0.423201	-0.0544348	hypomethylation	0.00795327	0.0159889
cg01680988	0.907589	0.82435	-0.0832397	hypomethylation	0.000101324	0.00347289
cg01683724	0.346276	0.296267	-0.0500094	hypomethylation	0.00960842	0.0176949
cg01696605	0.790752	0.730386	-0.0603661	hypomethylation	0.0134862	0.0209032
cg01713095	0.870115	0.813845	-0.05627	hypomethylation	0.0176156	0.0247078
cg01722829	0.499344	0.446336	-0.0530087	hypomethylation	0.00994563	0.017861
cg01730785	0.9311	0.878099	-0.0530013	hypomethylation	0.00202814	0.00945841
cg01739960	0.675797	0.620273	-0.0555247	hypomethylation	0.0365633	0.0400561
cg01741606	0.595485	0.54139	-0.0540952	hypomethylation	0.000979989	0.00752456
cg01743873	0.446787	0.395278	-0.0515085	hypomethylation	0.0105298	0.0184552
cg01747862	0.402478	0.322994	-0.0794836	hypomethylation	0.00439391	0.0121555
cg01754713	0.317055	0.368301	0.0512456	hypermethylation	6.27228e-05	0.00318099
cg01760756	0.209102	0.14561	-0.0634917	hypomethylation	0.00251788	0.00995302
cg01792601	0.245792	0.186642	-0.0591506	hypomethylation	0.00700206	0.0150095
cg01797371	0.189726	0.131045	-0.0586804	hypomethylation	0.00633577	0.014209
cg01809234	0.717949	0.665111	-0.0528376	hypomethylation	0.000794716	0.00701073
cg01817364	0.796355	0.855006	0.0586509	hypermethylation	0.00057162	0.00649513
cg01830073	0.696596	0.629918	-0.0666781	hypomethylation	0.00131506	0.00820079
cg01833234	0.692287	0.781458	0.0891712	hypermethylation	0.033653	0.0375859
cg01847719	0.0454044	0.116406	0.0710012	hypermethylation	0.00390187	0.0116665
cg01849085	0.213737	0.143293	-0.070444	hypomethylation	0.0129081	0.0204712
cg01850179	0.333637	0.255576	-0.0780613	hypomethylation	0.0027319	0.0104042
cg01860545	0.821888	0.771204	-0.050684	hypomethylation	0.0163968	0.0236407
cg01862828	0.794483	0.847795	0.0533122	hypermethylation	0.0236496	0.029583
cg01904886	0.518272	0.4251	-0.0931726	hypomethylation	0.000703017	0.00676989
cg01907094	0.350977	0.282625	-0.0683522	hypomethylation	0.0153433	0.0226779
cg01910804	0.576907	0.498918	-0.0779895	hypomethylation	0.000212994	0.00471042
cg01925738	0.573318	0.634182	0.0608639	hypermethylation	0.0129195	0.0204748
cg01930518	0.206572	0.156087	-0.0504847	hypomethylation	0.00317322	0.010812
cg01942530	0.511569	0.455614	-0.0559545	hypomethylation	0.00941167	0.0175589
cg01954567	0.738499	0.794471	0.0559722	hypermethylation	0.0225658	0.0288564
cg01971034	0.832368	0.763101	-0.0692668	hypomethylation	0.00132922	0.00820079
cg01988523	0.874685	0.947266	0.0725814	hypermethylation	0.0458026	0.0474969
cg01993818	0.654349	0.70803	0.0536814	hypermethylation	0.0324896	0.0366911
cg02004203	0.916773	0.854198	-0.0625745	hypomethylation	0.00291816	0.0105991
cg02010763	0.777477	0.831769	0.0542917	hypermethylation	0.000285642	0.00518472
cg02017417	0.779783	0.834896	0.0551129	hypermethylation	0.00813382	0.0162741
cg02020042	0.896407	0.827299	-0.0691083	hypomethylation	0.0390044	0.0420368
cg02030403	0.257887	0.201412	-0.0564755	hypomethylation	0.00126647	0.0081268
cg02045971	0.563033	0.617219	0.0541856	hypermethylation	0.026414	0.0317496
cg02054572	0.856251	0.737303	-0.118948	hypomethylation	2.97422e-07	0.000187599
cg02070549	0.303819	0.250559	-0.05326	hypomethylation	0.0081271	0.0162735
cg02076818	0.865993	0.812281	-0.0537117	hypomethylation	0.00894878	0.0171044
cg02089848	0.489603	0.436193	-0.0534102	hypomethylation	0.000538797	0.00638695
cg02090731	0.24594	0.186941	-0.0589988	hypomethylation	0.00351901	0.0113825
cg02091185	0.665341	0.735268	0.0699279	hypermethylation	0.0122964	0.0198616
cg02093168	0.65082	0.578879	-0.071941	hypomethylation	0.0181473	0.0251293
cg02095324	0.883402	0.812502	-0.0709002	hypomethylation	0.012305	0.0198627
cg02107357	0.669513	0.587231	-0.0822817	hypomethylation	0.00637067	0.0142493
cg02111951	0.334357	0.395081	0.0607234	hypermethylation	0.0230495	0.0292843
cg02122540	0.798418	0.743545	-0.0548735	hypomethylation	0.00310805	0.010812
cg02143656	0.753833	0.69337	-0.0604632	hypomethylation	0.00483271	0.012596
cg02167837	0.703591	0.760777	0.0571857	hypermethylation	0.0116664	0.0193802
cg02179936	0.536043	0.466761	-0.0692821	hypomethylation	0.019143	0.0260788
cg02218090	0.526471	0.422133	-0.104338	hypomethylation	0.045008	0.0468365
cg02239677	0.355884	0.40809	0.0522058	hypermethylation	0.0331587	0.0371985
cg02249577	0.932635	0.87376	-0.0588744	hypomethylation	0.024914	0.0306326
cg02263144	0.365592	0.315104	-0.050488	hypomethylation	0.0136	0.0210077
cg02272859	0.625327	0.685803	0.060476	hypermethylation	0.00372095	0.0114806
cg02285852	0.769239	0.70928	-0.0599589	hypomethylation	0.0321283	0.036415
cg02286533	0.6172	0.668306	0.0511054	hypermethylation	0.0359339	0.0394866
cg02290262	0.395034	0.335498	-0.0595355	hypomethylation	0.0151231	0.0224974
cg02291908	0.910821	0.854762	-0.0560589	hypomethylation	0.000528311	0.00638695
cg02294838	0.823355	0.770354	-0.0530002	hypomethylation	0.0121316	0.0197217
cg02306639	0.466024	0.404841	-0.0611822	hypomethylation	0.00696485	0.0149529
cg02314201	0.338732	0.271798	-0.0669348	hypomethylation	0.0416788	0.0441274
cg02314586	0.526784	0.475212	-0.0515721	hypomethylation	0.0112606	0.0190846
cg02314692	0.518921	0.448807	-0.070114	hypomethylation	0.0303925	0.0350013
cg02341737	0.379758	0.322579	-0.057179	hypomethylation	0.0129091	0.0204712
cg02343008	0.349088	0.298428	-0.0506599	hypomethylation	0.00457195	0.0123427
cg02344735	0.675986	0.610941	-0.0650447	hypomethylation	0.0197078	0.0265614
cg02349146	0.513768	0.462719	-0.0510491	hypomethylation	0.0206955	0.0272959
cg02351381	0.23233	0.293638	0.0613088	hypermethylation	0.00604123	0.0139707
cg02355366	0.748234	0.798325	0.0500914	hypermethylation	0.0156289	0.022902
cg02359411	0.594047	0.536091	-0.0579567	hypomethylation	0.00988824	0.0178054
cg02364831	0.333704	0.279559	-0.0541449	hypomethylation	0.00488838	0.0126887
cg02380135	0.36412	0.307961	-0.0561593	hypomethylation	0.000543035	0.00638695
cg02389942	0.186847	0.238637	0.0517894	hypermethylation	0.0299344	0.0346443
cg02392555	0.393542	0.34227	-0.0512727	hypomethylation	0.0122045	0.0197936
cg02447542	0.318485	0.438395	0.11991	hypermethylation	0.0284394	0.0334356
cg02468316	0.938013	0.885534	-0.0524784	hypomethylation	0.0159177	0.0231472
cg02477603	0.406086	0.463409	0.0573236	hypermethylation	0.0136794	0.0210703
cg02492567	0.828523	0.751401	-0.0771219	hypomethylation	0.00359469	0.0114567
cg02506100	0.87372	0.819241	-0.0544791	hypomethylation	0.00206176	0.00951979
cg02518007	0.389466	0.305685	-0.0837811	hypomethylation	0.00156446	0.00873074
cg02529723	0.315842	0.253847	-0.0619948	hypomethylation	0.000998876	0.00752456
cg02536916	0.558916	0.506138	-0.052778	hypomethylation	0.00393039	0.0116665
cg02541887	0.632049	0.581241	-0.050808	hypomethylation	0.00364896	0.0114567
cg02551604	0.249539	0.196431	-0.0531078	hypomethylation	0.000223213	0.0047325
cg02562344	0.599561	0.547328	-0.0522333	hypomethylation	0.0398234	0.042628
cg02565993	0.28797	0.234402	-0.0535683	hypomethylation	0.00375142	0.0115057
cg02577387	0.458768	0.527067	0.0682982	hypermethylation	0.000176179	0.00425123
cg02589130	0.909042	0.852275	-0.0567669	hypomethylation	0.0154547	0.0227891
cg02595245	0.822634	0.885918	0.0632842	hypermethylation	0.0465912	0.0481366
cg02599361	0.483256	0.561597	0.0783409	hypermethylation	0.0361288	0.0396662
cg02601140	0.464947	0.406637	-0.0583095	hypomethylation	0.00656769	0.0144592
cg02605776	0.409705	0.354469	-0.0552367	hypomethylation	0.00246922	0.00995302
cg02654270	0.629232	0.574444	-0.0547879	hypomethylation	0.00823329	0.0163971
cg02655549	0.531351	0.466981	-0.0643701	hypomethylation	0.00127013	0.0081268
cg02656472	0.500834	0.448577	-0.0522569	hypomethylation	0.0286614	0.0336182
cg02675527	0.214408	0.151983	-0.0624245	hypomethylation	0.0251755	0.0308284
cg02678768	0.585483	0.67592	0.0904367	hypermethylation	0.00202308	0.00945841
cg02688549	0.581656	0.516462	-0.0651945	hypomethylation	0.00309387	0.010812
cg02695864	0.942359	0.882769	-0.05959	hypomethylation	0.00203802	0.00947866
cg02706365	0.339727	0.266012	-0.0737148	hypomethylation	0.00150591	0.00860816
cg02713706	0.668601	0.719902	0.051301	hypermethylation	0.0330759	0.0371387
cg02719489	0.90458	0.842538	-0.0620412	hypomethylation	0.0043231	0.0120521
cg02722613	0.0330042	0.102877	0.0698729	hypermethylation	0.0236858	0.0295985
cg02732176	0.707724	0.843746	0.136022	hypermethylation	0.00193724	0.00933974
cg02757172	0.354684	0.297906	-0.0567779	hypomethylation	0.0182317	0.0251655
cg02766704	0.788653	0.736311	-0.0523419	hypomethylation	0.00208672	0.00952316
cg02790260	0.719586	0.652705	-0.066881	hypomethylation	0.00590405	0.0138117
cg02792933	0.457618	0.511	0.053382	hypermethylation	0.0094175	0.0175589
cg02793280	0.820826	0.765689	-0.0551365	hypomethylation	0.0145983	0.0219105
cg02795334	0.560391	0.506761	-0.05363	hypomethylation	0.0261459	0.0315175
cg02803228	0.606572	0.556429	-0.0501437	hypomethylation	0.0400507	0.0427987
cg02826687	0.693866	0.635165	-0.058701	hypomethylation	0.0100473	0.0179783
cg02832476	0.614582	0.54786	-0.0667219	hypomethylation	0.00240613	0.00995302
cg02833950	0.756234	0.701952	-0.0542818	hypomethylation	0.0296361	0.034413
cg02848875	0.556201	0.647102	0.0909008	hypermethylation	0.00206394	0.00951979
cg02865165	0.381162	0.322552	-0.0586105	hypomethylation	0.0291238	0.0339711
cg02866106	0.428242	0.349594	-0.0786484	hypomethylation	0.00216511	0.00971221
cg02867811	0.928226	0.868679	-0.0595474	hypomethylation	0.00145826	0.00849176
cg02873163	0.436066	0.519048	0.0829824	hypermethylation	0.0344218	0.0382906
cg02879029	0.410332	0.353981	-0.0563517	hypomethylation	0.00130611	0.0081973
cg02895588	0.894808	0.836213	-0.0585948	hypomethylation	0.00622299	0.0141702
cg02913402	0.697441	0.633708	-0.0637326	hypomethylation	0.000564312	0.00649513
cg02921624	0.329292	0.269196	-0.0600966	hypomethylation	4.31746e-05	0.00296349
cg02922781	0.81146	0.759095	-0.0523655	hypomethylation	0.00663477	0.0145435
cg02928184	0.609616	0.557273	-0.0523435	hypomethylation	0.0302194	0.0349101
cg02956042	0.844757	0.774782	-0.0699746	hypomethylation	0.00167418	0.00893343
cg02965526	0.508611	0.454323	-0.0542877	hypomethylation	0.00644876	0.0143224
cg02966053	0.788687	0.736039	-0.0526483	hypomethylation	0.000493436	0.00627463
cg02974204	0.620743	0.569256	-0.0514871	hypomethylation	0.00723615	0.0152165
cg02976617	0.0601154	0.118049	0.0579336	hypermethylation	0.00892196	0.017079
cg02981003	0.0885063	0.179141	0.0906349	hypermethylation	0.0291034	0.0339629
cg02991085	0.238462	0.294971	0.0565091	hypermethylation	0.0370618	0.0404792
cg03025082	0.771483	0.833244	0.0617615	hypermethylation	0.00314951	0.010812
cg03025830	0.543604	0.595998	0.0523939	hypermethylation	0.00924738	0.0173994
cg03035759	0.66953	0.73228	0.0627508	hypermethylation	0.0217943	0.0282419
cg03043243	0.883304	0.800208	-0.0830956	hypomethylation	0.0376425	0.0409539
cg03043822	0.667908	0.723081	0.0551722	hypermethylation	0.0386312	0.0417773
cg03064754	0.936256	0.886047	-0.0502094	hypomethylation	0.0227324	0.0290252
cg03073264	0.067541	0.126216	0.0586748	hypermethylation	0.00811796	0.0162682
cg03074968	0.826266	0.881882	0.0556162	hypermethylation	0.00312412	0.010812
cg03080105	0.751936	0.695024	-0.0569126	hypomethylation	0.00441242	0.01218
cg03080605	0.722172	0.661925	-0.0602466	hypomethylation	0.0182514	0.0251755
cg03087600	0.843431	0.778479	-0.0649519	hypomethylation	0.00022924	0.00474075
cg03091413	0.748034	0.79975	0.0517165	hypermethylation	0.0153056	0.0226524
cg03097147	0.750061	0.816598	0.0665368	hypermethylation	0.00838885	0.0165481
cg03111858	0.864002	0.805022	-0.0589795	hypomethylation	0.00611348	0.0140408
cg03114004	0.602693	0.53615	-0.066543	hypomethylation	0.00973925	0.0177129
cg03118800	0.574476	0.520916	-0.0535605	hypomethylation	0.000855355	0.00717461
cg03133378	0.70913	0.777408	0.0682773	hypermethylation	0.0233847	0.0294555
cg03138560	0.892338	0.835308	-0.0570295	hypomethylation	0.00497935	0.0127825
cg03141074	0.819315	0.76857	-0.0507452	hypomethylation	0.00779738	0.0158524
cg03147592	0.601909	0.683926	0.0820171	hypermethylation	0.00250445	0.00995302
cg03148946	0.540682	0.487882	-0.0527998	hypomethylation	0.0163014	0.0235459
cg03163337	0.934678	0.872358	-0.06232	hypomethylation	0.000655312	0.00665674
cg03165304	0.896999	0.844374	-0.0526251	hypomethylation	0.00163492	0.00886416
cg03176520	0.486828	0.430132	-0.0566959	hypomethylation	0.00377068	0.0115314
cg03185552	0.768046	0.649095	-0.118951	hypomethylation	0.0243009	0.0301306
cg03187573	0.894956	0.843499	-0.0514578	hypomethylation	0.0011909	0.00792778
cg03188390	0.458189	0.403466	-0.0547233	hypomethylation	0.0420947	0.0443617
cg03207151	0.463352	0.403182	-0.0601692	hypomethylation	0.0072897	0.0152793
cg03213396	0.826562	0.75899	-0.0675718	hypomethylation	0.00269588	0.0103369
cg03221652	0.393764	0.33111	-0.0626538	hypomethylation	0.00400442	0.0116665
cg03228974	0.368205	0.313547	-0.0546587	hypomethylation	0.0182047	0.0251655
cg03257308	0.739687	0.685116	-0.0545708	hypomethylation	0.0448365	0.0467062
cg03302539	0.665728	0.76877	0.103042	hypermethylation	0.000812916	0.00705896
cg03303774	0.374802	0.297212	-0.0775902	hypomethylation	0.000427504	0.00613812
cg03308092	0.387287	0.332206	-0.0550807	hypomethylation	0.017229	0.0244159
cg03310027	0.795467	0.85503	0.059563	hypermethylation	1.34744e-05	0.00242755
cg03317987	0.616031	0.55947	-0.056561	hypomethylation	0.00925486	0.0173994
cg03319082	0.566376	0.504898	-0.0614775	hypomethylation	0.0288433	0.033785
cg03328727	0.322299	0.254196	-0.0681021	hypomethylation	0.0195298	0.0264061
cg03334052	0.733934	0.65127	-0.0826637	hypomethylation	2.8137e-05	0.00252693
cg03334213	0.846046	0.783386	-0.0626605	hypomethylation	0.00316328	0.010812
cg03336402	0.890517	0.834892	-0.0556247	hypomethylation	0.0165534	0.0237838
cg03337057	0.503398	0.569878	0.06648	hypermethylation	0.00367467	0.0114567
cg03338950	0.266716	0.198778	-0.0679375	hypomethylation	0.0104452	0.0184073
cg03350138	0.450068	0.381374	-0.068694	hypomethylation	0.0106737	0.0185703
cg03353394	0.525705	0.468958	-0.0567469	hypomethylation	0.00274592	0.0104042
cg03369084	0.327009	0.267118	-0.0598903	hypomethylation	0.0270612	0.0321506
cg03369398	0.675758	0.62498	-0.0507772	hypomethylation	0.0125233	0.0201122
cg03392386	0.723449	0.805091	0.0816416	hypermethylation	6.30399e-05	0.00318099
cg03395546	0.390743	0.33092	-0.0598226	hypomethylation	9.01574e-05	0.00334566
cg03409548	0.640344	0.579222	-0.0611222	hypomethylation	0.00224382	0.00977469
cg03409605	0.398966	0.342116	-0.0568504	hypomethylation	0.000226419	0.00473756
cg03439544	0.391664	0.340708	-0.0509559	hypomethylation	0.00754831	0.0155714
cg03451600	0.417363	0.362928	-0.0544342	hypomethylation	0.00763839	0.0156808
cg03454353	0.334185	0.275026	-0.0591587	hypomethylation	0.0270155	0.0321506
cg03463174	0.455973	0.399694	-0.0562782	hypomethylation	0.0221635	0.0285152
cg03463411	0.426771	0.365438	-0.0613329	hypomethylation	0.0146881	0.021993
cg03464017	0.800904	0.721623	-0.0792812	hypomethylation	0.00606177	0.0139711
cg03470837	0.592107	0.53022	-0.0618874	hypomethylation	0.00312916	0.010812
cg03478379	0.615823	0.556	-0.0598233	hypomethylation	0.00181939	0.00915462
cg03483707	0.202023	0.148691	-0.0533322	hypomethylation	0.00845789	0.0166064
cg03483727	0.543583	0.466152	-0.0774311	hypomethylation	0.00842708	0.0165717
cg03485299	0.599362	0.50476	-0.0946016	hypomethylation	0.00952543	0.0176389
cg03486986	0.24453	0.310099	0.0655687	hypermethylation	0.0159146	0.0231472
cg03490678	0.652821	0.599967	-0.0528546	hypomethylation	0.0155791	0.0228524
cg03495944	0.80672	0.858388	0.0516678	hypermethylation	0.00219325	0.00975424
cg03517284	0.458279	0.540452	0.0821727	hypermethylation	0.0336276	0.0375859
cg03521982	0.767313	0.705089	-0.0622241	hypomethylation	0.000735418	0.0069089
cg03550951	0.582477	0.52796	-0.0545167	hypomethylation	0.0218664	0.0282773
cg03558921	0.906575	0.852619	-0.0539562	hypomethylation	0.0308173	0.0353073
cg03576411	0.795757	0.847984	0.0522262	hypermethylation	0.00607277	0.0139711
cg03581189	0.90243	0.843289	-0.0591414	hypomethylation	0.0417715	0.044207
cg03582285	0.243379	0.327516	0.084137	hypermethylation	0.000445214	0.00613812
cg03589001	0.54122	0.591538	0.0503177	hypermethylation	0.00785021	0.015883
cg03595881	0.425868	0.372383	-0.0534847	hypomethylation	0.0150804	0.0224543
cg03607220	0.827442	0.759005	-0.0684367	hypomethylation	0.0438385	0.045856
cg03607907	0.612151	0.538553	-0.0735981	hypomethylation	0.00301997	0.0107197
cg03623045	0.915585	0.861511	-0.0540739	hypomethylation	0.000292017	0.00522523
cg03635442	0.187527	0.267987	0.08046	hypermethylation	0.0397814	0.0426149
cg03635702	0.41744	0.331006	-0.0864336	hypomethylation	0.0480786	0.04933
cg03643149	0.442621	0.51049	0.0678696	hypermethylation	0.0114402	0.0191943
cg03644971	0.896625	0.84238	-0.0542453	hypomethylation	0.00177854	0.00911249
cg03665818	0.832007	0.760952	-0.0710549	hypomethylation	0.00421573	0.0120039
cg03669949	0.815822	0.876583	0.0607608	hypermethylation	0.016272	0.0235315
cg03676918	0.837802	0.777694	-0.0601081	hypomethylation	0.00157213	0.00873074
cg03689225	0.272165	0.217266	-0.0548992	hypomethylation	0.00235452	0.00995302
cg03705621	0.48659	0.429194	-0.0573958	hypomethylation	0.0104669	0.0184285
cg03706977	0.844292	0.781653	-0.0626396	hypomethylation	2.87588e-05	0.00252693
cg03711944	0.726606	0.776759	0.0501526	hypermethylation	0.00568757	0.0135798
cg03732617	0.659513	0.583034	-0.0764789	hypomethylation	0.00363665	0.0114567
cg03736781	0.422471	0.370121	-0.0523498	hypomethylation	0.0302881	0.0349521
cg03738707	0.265294	0.396604	0.131309	hypermethylation	0.00194539	0.00933974
cg03740217	0.73812	0.684889	-0.053231	hypomethylation	0.00543423	0.01336
cg03751149	0.912047	0.857495	-0.0545521	hypomethylation	0.00496075	0.0127714
cg03754708	0.735273	0.666119	-0.0691541	hypomethylation	0.000168944	0.00425123
cg03777614	0.732809	0.619518	-0.113291	hypomethylation	0.0389942	0.0420368
cg03798743	0.210273	0.151868	-0.0584044	hypomethylation	0.000630687	0.00665674
cg03803541	0.454062	0.509049	0.0549868	hypermethylation	0.0166579	0.0238795
cg03803658	0.41311	0.342386	-0.0707236	hypomethylation	0.0190627	0.0259975
cg03807316	0.368324	0.303913	-0.0644109	hypomethylation	0.045609	0.0473156
cg03809021	0.377409	0.32587	-0.0515393	hypomethylation	0.0412116	0.0437429
cg03817727	0.582653	0.515366	-0.0672871	hypomethylation	0.00246683	0.00995302
cg03827804	0.829496	0.774652	-0.0548439	hypomethylation	0.00452248	0.0123195
cg03838769	0.784583	0.729628	-0.0549542	hypomethylation	0.0118941	0.0195243
cg03848129	0.33607	0.421838	0.0857688	hypermethylation	0.00194154	0.00933974
cg03858703	0.791922	0.847884	0.0559627	hypermethylation	0.0114167	0.0191943
cg03870816	0.823408	0.773398	-0.0500099	hypomethylation	0.00798984	0.0160497
cg03871489	0.759497	0.685024	-0.0744729	hypomethylation	0.000858446	0.00717461
cg03881527	0.816513	0.766128	-0.0503848	hypomethylation	0.0171045	0.0243262
cg03887787	0.304363	0.23655	-0.0678127	hypomethylation	0.00543988	0.01336
cg03890691	0.365148	0.422741	0.0575931	hypermethylation	0.00875436	0.0169251
cg03905800	0.906005	0.958474	0.0524689	hypermethylation	0.0131966	0.0207001
cg03913400	0.498131	0.443071	-0.05506	hypomethylation	0.00955506	0.0176389
cg03916477	0.910651	0.962373	0.0517218	hypermethylation	0.0265543	0.0318228
cg03930209	0.600778	0.656442	0.0556633	hypermethylation	0.0108901	0.0188143
cg03938978	0.460629	0.357114	-0.103515	hypomethylation	0.0260106	0.0314145
cg03980231	0.579559	0.521803	-0.0577564	hypomethylation	0.00152401	0.00864063
cg04017413	0.390997	0.309724	-0.0812731	hypomethylation	2.62364e-05	0.00252693
cg04034967	0.687759	0.762841	0.0750818	hypermethylation	0.00450473	0.0123136
cg04038455	0.753821	0.806066	0.0522447	hypermethylation	0.00701836	0.0150317
cg04038932	0.328522	0.254943	-0.0735781	hypomethylation	0.000162217	0.00417627
cg04075781	0.316747	0.263029	-0.0537178	hypomethylation	0.0116345	0.0193499
cg04075986	0.261558	0.194479	-0.0670795	hypomethylation	0.00447342	0.0122759
cg04076766	0.202305	0.2673	0.0649949	hypermethylation	0.0122759	0.0198411
cg04105270	0.436276	0.381379	-0.0548967	hypomethylation	0.00709505	0.0150807
cg04115370	0.528303	0.47526	-0.0530435	hypomethylation	0.0113684	0.01916
cg04135377	0.5068	0.449713	-0.0570868	hypomethylation	0.0146819	0.021993
cg04146883	0.875502	0.819779	-0.055723	hypomethylation	0.00468545	0.0124671
cg04165656	0.372804	0.318185	-0.0546196	hypomethylation	0.0385612	0.0417374
cg04180046	0.610228	0.553941	-0.0562867	hypomethylation	0.00970209	0.0177129
cg04185799	0.744897	0.675017	-0.0698804	hypomethylation	0.00907919	0.0172714
cg04193787	0.31331	0.259522	-0.053788	hypomethylation	0.00615965	0.0141024
cg04204897	0.8384	0.774687	-0.0637126	hypomethylation	0.00168882	0.00895145
cg04222466	0.740821	0.687479	-0.0533422	hypomethylation	0.00117776	0.00792126
cg04258514	0.641886	0.589695	-0.0521909	hypomethylation	0.0189389	0.025925
cg04264726	0.301492	0.242928	-0.0585638	hypomethylation	0.0290407	0.0339211
cg04269530	0.446186	0.39409	-0.0520962	hypomethylation	0.0261034	0.0314813
cg04284122	0.368222	0.31454	-0.0536818	hypomethylation	0.000475566	0.00624923
cg04292104	0.530298	0.464079	-0.066219	hypomethylation	0.000145713	0.0040043
cg04297635	0.581659	0.529832	-0.0518272	hypomethylation	0.00973517	0.0177129
cg04300553	0.805337	0.72106	-0.0842771	hypomethylation	0.00655007	0.0144537
cg04308838	0.735529	0.676483	-0.0590458	hypomethylation	0.0015857	0.00873074
cg04316909	0.257611	0.186162	-0.0714493	hypomethylation	0.00309249	0.010812
cg04334746	0.874512	0.81929	-0.0552223	hypomethylation	0.0102977	0.0182826
cg04348643	0.69489	0.632842	-0.0620475	hypomethylation	0.000121444	0.00373663
cg04364764	0.780373	0.717625	-0.062748	hypomethylation	0.0110658	0.0189668
cg04384112	0.487607	0.557448	0.0698408	hypermethylation	0.032996	0.0370654
cg04385438	0.3857	0.328783	-0.0569169	hypomethylation	0.000297112	0.00523647
cg04393301	0.62265	0.571792	-0.050858	hypomethylation	0.00426396	0.0120067
cg04395930	0.871049	0.817627	-0.0534217	hypomethylation	0.0156504	0.0229169
cg04406111	0.619014	0.679204	0.0601903	hypermethylation	0.0373664	0.0407453
cg04417703	0.726417	0.782593	0.0561759	hypermethylation	0.00545526	0.01336
cg04436207	0.247025	0.180888	-0.0661363	hypomethylation	0.00596755	0.0138766
cg04440119	0.89885	0.847278	-0.0515715	hypomethylation	0.0242771	0.0301284
cg04461867	0.709471	0.653656	-0.0558151	hypomethylation	0.0109078	0.0188239
cg04486436	0.8666	0.808351	-0.0582491	hypomethylation	0.00392201	0.0116665
cg04488372	0.8191	0.760955	-0.0581449	hypomethylation	0.00042468	0.00613812
cg04511182	0.609824	0.553504	-0.0563201	hypomethylation	0.0312422	0.0356187
cg04517524	0.508068	0.558161	0.0500933	hypermethylation	0.034771	0.0386152
cg04522024	0.868402	0.813097	-0.0553046	hypomethylation	0.00242704	0.00995302
cg04524478	0.268935	0.210862	-0.0580733	hypomethylation	0.00105245	0.00755489
cg04527429	0.598815	0.545225	-0.0535902	hypomethylation	0.00560818	0.0135274
cg04567738	0.438832	0.372277	-0.0665553	hypomethylation	0.00965136	0.0176965
cg04585475	0.774887	0.710627	-0.06426	hypomethylation	0.00157809	0.00873074
cg04588674	0.60693	0.662416	0.0554861	hypermethylation	0.0267514	0.0319422
cg04595372	0.792864	0.734307	-0.0585578	hypomethylation	0.0258974	0.0313377
cg04612608	0.578842	0.661715	0.0828733	hypermethylation	8.87939e-05	0.00334566
cg04638650	0.811098	0.743516	-0.0675824	hypomethylation	0.0154753	0.0228062
cg04650238	0.723108	0.779511	0.0564033	hypermethylation	0.000469213	0.00623855
cg04682830	0.834693	0.784482	-0.0502116	hypomethylation	0.00387351	0.0116482
cg04692312	0.452127	0.375203	-0.0769239	hypomethylation	0.0472247	0.0485921
cg04705669	0.521429	0.433267	-0.0881623	hypomethylation	0.0178055	0.0248196
cg04714058	0.811993	0.748719	-0.0632738	hypomethylation	0.000954691	0.00751735
cg04721103	0.918681	0.867655	-0.0510267	hypomethylation	0.000494794	0.00627463
cg04743171	0.388576	0.337984	-0.0505916	hypomethylation	0.0414002	0.0438905
cg04750100	0.333093	0.390875	0.0577821	hypermethylation	0.00471999	0.0124671
cg04767226	0.713912	0.792492	0.0785807	hypermethylation	0.00491937	0.0126925
cg04778125	0.554804	0.498511	-0.0562932	hypomethylation	0.017529	0.0246382
cg04779233	0.784609	0.733934	-0.0506747	hypomethylation	0.0156861	0.0229334
cg04782521	0.676646	0.620175	-0.0564717	hypomethylation	0.000153531	0.00403499
cg04783624	0.8088	0.733012	-0.0757878	hypomethylation	0.00155919	0.00873074
cg04807561	0.776001	0.719645	-0.0563556	hypomethylation	0.00278661	0.0104622
cg04811114	0.388464	0.291807	-0.0966568	hypomethylation	0.0155231	0.0228366
cg04816306	0.828212	0.77423	-0.0539818	hypomethylation	0.00455249	0.012324
cg04821248	0.691837	0.751263	0.059426	hypermethylation	0.0103116	0.0182826
cg04835811	0.369919	0.314588	-0.0553308	hypomethylation	0.0135179	0.0209366
cg04847540	0.591857	0.650169	0.0583128	hypermethylation	0.0127391	0.0203508
cg04850382	0.599556	0.536115	-0.063441	hypomethylation	0.00334528	0.0111305
cg04853129	0.766227	0.71552	-0.0507065	hypomethylation	0.00341348	0.0112431
cg04859241	0.627041	0.576034	-0.0510077	hypomethylation	0.00124512	0.00805495
cg04865929	0.648539	0.701893	0.0533541	hypermethylation	0.0167725	0.0240029
cg04875128	0.207733	0.261367	0.053634	hypermethylation	0.0056179	0.0135356
cg04875591	0.728153	0.664227	-0.0639253	hypomethylation	0.00304644	0.0107499
cg04883648	0.927867	0.866772	-0.0610948	hypomethylation	0.000218123	0.00471042
cg04894169	0.67724	0.745266	0.0680268	hypermethylation	0.00291049	0.0105962
cg04896168	0.62458	0.552611	-0.0719695	hypomethylation	0.0449524	0.0468076
cg04928457	0.832174	0.777725	-0.0544486	hypomethylation	0.0023416	0.00995302
cg04940582	0.963405	0.911102	-0.0523028	hypomethylation	0.0354154	0.039084
cg04944853	0.935633	0.8828	-0.0528329	hypomethylation	0.014867	0.0222343
cg04945518	0.870821	0.811178	-0.0596422	hypomethylation	0.00284663	0.0105463
cg04995311	0.690648	0.743931	0.053283	hypermethylation	0.0117668	0.0194928
cg05002041	0.226365	0.156753	-0.069612	hypomethylation	5.02897e-07	0.000253762
cg05002406	0.842958	0.893319	0.0503607	hypermethylation	0.000515613	0.00637693
cg05005308	0.305177	0.246001	-0.0591764	hypomethylation	0.0119716	0.0195886
cg05009104	0.80841	0.756224	-0.0521863	hypomethylation	0.0074389	0.0154472
cg05014721	0.616528	0.683492	0.0669641	hypermethylation	0.00786649	0.0158944
cg05021355	0.474293	0.419338	-0.0549547	hypomethylation	0.0335906	0.0375661
cg05031539	0.877858	0.818772	-0.0590866	hypomethylation	0.00187865	0.00929705
cg05041596	0.355328	0.304323	-0.0510045	hypomethylation	0.025634	0.0311912
cg05044291	0.343993	0.262352	-0.0816413	hypomethylation	0.00998462	0.0179111
cg05059566	0.256564	0.204125	-0.0524394	hypomethylation	0.0459675	0.0475897
cg05062489	0.651832	0.592739	-0.0590922	hypomethylation	0.00219989	0.00975452
cg05097643	0.325341	0.274495	-0.0508456	hypomethylation	0.0107219	0.0186047
cg05115862	0.854743	0.916923	0.0621806	hypermethylation	0.00329075	0.0110373
cg05130482	0.204884	0.123829	-0.0810549	hypomethylation	0.0390259	0.042042
cg05140286	0.827295	0.773075	-0.0542205	hypomethylation	0.00923592	0.0173994
cg05158606	0.455755	0.395019	-0.0607356	hypomethylation	0.0112242	0.0190826
cg05167694	0.65185	0.596518	-0.0553315	hypomethylation	0.00185757	0.00924387
cg05168668	0.39275	0.339331	-0.0534189	hypomethylation	0.00129098	0.00814217
cg05169951	0.571198	0.47465	-0.0965484	hypomethylation	0.0418356	0.0442192
cg05192831	0.635887	0.583809	-0.052078	hypomethylation	0.0380834	0.0413088
cg05193584	0.638951	0.581633	-0.057318	hypomethylation	0.00142273	0.00842614
cg05194412	0.463623	0.411397	-0.0522261	hypomethylation	0.0253621	0.0309573
cg05204095	0.501187	0.449461	-0.0517265	hypomethylation	0.0344358	0.0382906
cg05213296	0.379697	0.301056	-0.0786409	hypomethylation	0.044577	0.0464935
cg05228338	0.657663	0.604381	-0.0532814	hypomethylation	0.00910697	0.0173019
cg05249074	0.768291	0.70881	-0.0594815	hypomethylation	0.00114726	0.00783153
cg05250352	0.946295	0.882647	-0.0636477	hypomethylation	0.0010929	0.00773942
cg05269845	0.837177	0.904451	0.0672739	hypermethylation	0.00498026	0.0127825
cg05278780	0.677588	0.581459	-0.0961289	hypomethylation	0.00544334	0.01336
cg05290582	0.476616	0.42267	-0.0539452	hypomethylation	0.00296511	0.0106808
cg05291677	0.827931	0.883566	0.055635	hypermethylation	0.00721543	0.0152148
cg05293216	0.811359	0.863411	0.0520517	hypermethylation	0.0126732	0.0202883
cg05310160	0.624144	0.700149	0.0760044	hypermethylation	0.00144849	0.00847923
cg05314706	0.288075	0.22913	-0.0589454	hypomethylation	0.000128264	0.00382281
cg05318186	0.515357	0.458575	-0.0567822	hypomethylation	0.00108659	0.00772377
cg05336808	0.387837	0.447285	0.0594484	hypermethylation	0.00547629	0.0133624
cg05371159	0.320298	0.267325	-0.0529729	hypomethylation	0.00347851	0.0113825
cg05373662	0.8108	0.88459	0.0737895	hypermethylation	0.0403227	0.043053
cg05376227	0.658429	0.596677	-0.0617524	hypomethylation	0.0263022	0.0316304
cg05392610	0.916458	0.862305	-0.0541532	hypomethylation	0.000770555	0.0069826
cg05403689	0.735572	0.79194	0.056368	hypermethylation	0.00538731	0.0133247
cg05404236	0.277938	0.345222	0.0672835	hypermethylation	0.00222783	0.00977469
cg05406923	0.35121	0.286794	-0.0644153	hypomethylation	0.0165124	0.0237383
cg05408873	0.954988	0.89658	-0.0584078	hypomethylation	0.0133586	0.0208436
cg05446675	0.529522	0.473355	-0.0561674	hypomethylation	0.00778196	0.0158466
cg05449874	0.525579	0.46517	-0.0604089	hypomethylation	0.0178499	0.0248567
cg05463589	0.531408	0.589454	0.0580463	hypermethylation	0.0197194	0.0265627
cg05465448	0.822287	0.757489	-0.0647974	hypomethylation	0.00153215	0.0086673
cg05474006	0.755985	0.697626	-0.0583587	hypomethylation	0.000579865	0.00650221
cg05478821	0.787764	0.842649	0.0548854	hypermethylation	0.0440378	0.0460263
cg05501584	0.178366	0.122161	-0.0562051	hypomethylation	0.00190304	0.00929705
cg05502766	0.838734	0.772496	-0.0662387	hypomethylation	0.00235408	0.00995302
cg05513735	0.415711	0.351577	-0.0641338	hypomethylation	0.00275626	0.0104258
cg05514909	0.425061	0.481415	0.0563536	hypermethylation	0.0176934	0.0247078
cg05516505	0.223524	0.274098	0.0505741	hypermethylation	0.00436369	0.0121177
cg05518370	0.642151	0.585418	-0.0567325	hypomethylation	0.00627693	0.0141826
cg05534094	0.236013	0.171391	-0.0646223	hypomethylation	0.00509887	0.0129551
cg05544927	0.652391	0.581945	-0.0704455	hypomethylation	0.0172777	0.0244418
cg05554000	0.582353	0.644153	0.0618006	hypermethylation	0.0311064	0.0354799
cg05570783	0.65087	0.7069	0.0560298	hypermethylation	0.00565525	0.0135798
cg05575921	0.738575	0.795422	0.0568469	hypermethylation	0.0484224	0.0495819
cg05580976	0.877437	0.792022	-0.0854153	hypomethylation	0.00399949	0.0116665
cg05620923	0.589633	0.643101	0.0534678	hypermethylation	0.0199188	0.0267457
cg05655903	0.598349	0.541821	-0.0565287	hypomethylation	0.0437606	0.0457935
cg05659611	0.451467	0.502191	0.050724	hypermethylation	0.0113521	0.0191453
cg05666036	0.330128	0.269968	-0.0601606	hypomethylation	0.0144011	0.0217417
cg05700860	0.612491	0.556444	-0.0560468	hypomethylation	0.0310953	0.0354799
cg05733557	0.903902	0.852899	-0.0510036	hypomethylation	0.00866187	0.0168159
cg05740739	0.813996	0.755085	-0.0589113	hypomethylation	0.00289371	0.0105814
cg05747234	0.896242	0.846233	-0.0500085	hypomethylation	0.000417365	0.00613812
cg05758538	0.591225	0.649563	0.0583383	hypermethylation	0.00889564	0.0170475
cg05758861	0.692993	0.785814	0.0928215	hypermethylation	0.000307871	0.00524837
cg05758931	0.823115	0.771338	-0.0517767	hypomethylation	0.00040141	0.00613812
cg05766510	0.709983	0.783449	0.0734655	hypermethylation	0.000784875	0.0069826
cg05772155	0.150392	0.205961	0.0555695	hypermethylation	0.012259	0.0198266
cg05773312	0.888052	0.832555	-0.0554966	hypomethylation	0.041174	0.0437213
cg05784098	0.716058	0.657792	-0.0582663	hypomethylation	0.0106799	0.0185703
cg05788368	0.853395	0.759457	-0.0939383	hypomethylation	0.0397942	0.0426149
cg05793094	0.729599	0.674455	-0.0551448	hypomethylation	0.00298043	0.0106808
cg05796475	0.452117	0.384018	-0.0680996	hypomethylation	0.00613262	0.0140532
cg05797914	0.562294	0.505753	-0.0565408	hypomethylation	0.00245201	0.00995302
cg05811998	0.379455	0.319163	-0.0602915	hypomethylation	0.00136133	0.0082168
cg05819613	0.588851	0.526145	-0.0627065	hypomethylation	0.00750774	0.0155263
cg05840541	0.281648	0.229864	-0.051784	hypomethylation	0.00156502	0.00873074
cg05844977	0.749947	0.693555	-0.0563912	hypomethylation	0.0017271	0.0090469
cg05845376	0.68272	0.73706	0.0543401	hypermethylation	0.0288824	0.033785
cg05863647	0.304714	0.251503	-0.0532113	hypomethylation	0.00696439	0.0149529
cg05869737	0.575708	0.515422	-0.0602854	hypomethylation	0.0144124	0.0217417
cg05873145	0.537456	0.592114	0.0546581	hypermethylation	0.00151304	0.00860816
cg05873532	0.779002	0.829033	0.0500309	hypermethylation	0.00857813	0.0167254
cg05896406	0.591135	0.531414	-0.0597207	hypomethylation	0.0420759	0.0443616
cg05907223	0.632163	0.563093	-0.0690702	hypomethylation	0.0128565	0.0204134
cg05907464	0.645634	0.581939	-0.0636947	hypomethylation	0.0482636	0.0494393
cg05907649	0.659531	0.608028	-0.0515022	hypomethylation	0.0477055	0.0490218
cg05923445	0.655375	0.705797	0.0504225	hypermethylation	0.0122072	0.0197936
cg05940452	0.501649	0.578791	0.0771417	hypermethylation	0.00244665	0.00995302
cg05964971	0.376308	0.323133	-0.0531755	hypomethylation	0.00252187	0.00995302
cg05971072	0.872774	0.811504	-0.0612699	hypomethylation	0.00460929	0.0123427
cg05974501	0.831409	0.779616	-0.0517934	hypomethylation	0.0111588	0.0190433
cg05992411	0.870152	0.804917	-0.0652353	hypomethylation	0.000497394	0.00627463
cg05995465	0.868895	0.706105	-0.16279	hypomethylation	0.0288619	0.033785
cg06012263	0.467774	0.417628	-0.0501464	hypomethylation	0.023512	0.0294981
cg06047130	0.92649	0.867995	-0.058495	hypomethylation	0.0209871	0.0275354
cg06061967	0.743222	0.683026	-0.0601963	hypomethylation	0.00179017	0.00912446
cg06101084	0.773843	0.829375	0.0555321	hypermethylation	0.00171118	0.00899441
cg06105925	0.0800757	0.154128	0.0740518	hypermethylation	0.00444771	0.0122373
cg06139856	0.460858	0.274934	-0.185924	hypomethylation	0.0104325	0.0184064
cg06150148	0.815726	0.711642	-0.104084	hypomethylation	0.0014667	0.00850183
cg06174561	0.442328	0.39142	-0.0509077	hypomethylation	0.0307934	0.0352984
cg06178383	0.493521	0.436112	-0.0574095	hypomethylation	0.00430902	0.0120521
cg06201514	0.413209	0.506095	0.0928861	hypermethylation	0.0238763	0.0297481
cg06203181	0.492657	0.434087	-0.0585695	hypomethylation	0.0193415	0.0262217
cg06218095	0.70934	0.622638	-0.0867012	hypomethylation	0.0115069	0.0192138
cg06223098	0.442564	0.391955	-0.0506088	hypomethylation	0.0223443	0.0286485
cg06231783	0.171126	0.256563	0.0854368	hypermethylation	0.020748	0.0273353
cg06251791	0.403392	0.35309	-0.0503016	hypomethylation	0.0126418	0.0202767
cg06272998	0.486616	0.432587	-0.0540284	hypomethylation	0.00883945	0.0170077
cg06278181	0.909957	0.85689	-0.0530674	hypomethylation	0.0254662	0.0310693
cg06285921	0.808536	0.752753	-0.0557833	hypomethylation	0.0460471	0.0476525
cg06286127	0.776215	0.721212	-0.0550028	hypomethylation	0.00458623	0.0123427
cg06288552	0.80955	0.744429	-0.0651219	hypomethylation	0.00489936	0.0126925
cg06300892	0.711451	0.654962	-0.0564894	hypomethylation	0.012974	0.0204968
cg06305962	0.629325	0.717554	0.0882294	hypermethylation	0.00558613	0.0135236
cg06306128	0.367192	0.314062	-0.0531297	hypomethylation	0.0486582	0.0497829
cg06307913	0.366144	0.296941	-0.0692027	hypomethylation	0.0123696	0.0199542
cg06310844	0.327058	0.270593	-0.0564647	hypomethylation	5.97538e-06	0.0016751
cg06311934	0.844485	0.787545	-0.0569398	hypomethylation	0.00102571	0.00752456
cg06357371	0.513162	0.455194	-0.0579685	hypomethylation	0.0233488	0.0294434
cg06363485	0.649795	0.565092	-0.0847028	hypomethylation	0.00666915	0.0145865
cg06365016	0.764572	0.841015	0.0764426	hypermethylation	0.00118675	0.00792126
cg06370132	0.288139	0.23571	-0.0524298	hypomethylation	0.000436939	0.00613812
cg06399965	0.541546	0.485585	-0.0559608	hypomethylation	0.00188237	0.00929705
cg06418475	0.25616	0.197298	-0.0588622	hypomethylation	0.000601237	0.00665316
cg06423211	0.586101	0.666716	0.0806149	hypermethylation	0.0166431	0.0238719
cg06427816	0.805152	0.729592	-0.0755591	hypomethylation	0.0471255	0.0485693
cg06437747	0.306616	0.25182	-0.0547961	hypomethylation	0.000535429	0.00638695
cg06446551	0.856902	0.806069	-0.0508326	hypomethylation	0.0069697	0.0149529
cg06460475	0.497982	0.571854	0.0738717	hypermethylation	0.0181057	0.0250856
cg06462970	0.542547	0.457136	-0.0854107	hypomethylation	0.00101392	0.00752456
cg06482857	0.548227	0.600815	0.0525873	hypermethylation	0.0035959	0.0114567
cg06484146	0.281889	0.228524	-0.0533647	hypomethylation	0.0478384	0.0491235
cg06494592	0.0689475	0.12849	0.0595424	hypermethylation	0.0376029	0.0409284
cg06517196	0.471241	0.416339	-0.0549019	hypomethylation	0.00158835	0.00873074
cg06539899	0.86269	0.809525	-0.0531656	hypomethylation	0.0118448	0.0195194
cg06540278	0.781888	0.72624	-0.0556484	hypomethylation	9.88895e-05	0.00346525
cg06550582	0.620897	0.564434	-0.0564627	hypomethylation	0.0313248	0.0356967
cg06565975	0.877368	0.932512	0.0551447	hypermethylation	3.24575e-05	0.00264162
cg06575863	0.92052	0.853647	-0.0668732	hypomethylation	0.0156889	0.0229334
cg06578276	0.562234	0.494882	-0.0673518	hypomethylation	0.00352301	0.0113825
cg06583200	0.843153	0.784914	-0.0582393	hypomethylation	9.12958e-05	0.00334566
cg06584784	0.774951	0.715835	-0.0591164	hypomethylation	0.0236397	0.029583
cg06590229	0.711094	0.660774	-0.0503191	hypomethylation	0.0245153	0.0302751
cg06595479	0.407436	0.477975	0.070539	hypermethylation	0.00068582	0.00672842
cg06595607	0.734511	0.677522	-0.0569888	hypomethylation	0.00381511	0.0116064
cg06600444	0.695488	0.558819	-0.136669	hypomethylation	0.000576659	0.00649513
cg06604589	0.292682	0.236925	-0.0557568	hypomethylation	0.000993346	0.00752456
cg06623017	0.502007	0.445443	-0.0565633	hypomethylation	0.00930932	0.0174498
cg06636551	0.278335	0.218729	-0.0596058	hypomethylation	0.0306762	0.035196
cg06639609	0.857123	0.806935	-0.0501877	hypomethylation	0.00592822	0.0138243
cg06641021	0.789054	0.733795	-0.0552586	hypomethylation	0.0131465	0.0206529
cg06645242	0.905355	0.851678	-0.0536773	hypomethylation	0.00237306	0.00995302
cg06658912	0.748943	0.684331	-0.0646124	hypomethylation	0.0200292	0.0268394
cg06669598	0.70653	0.613281	-0.0932485	hypomethylation	2.45942e-05	0.00252693
cg06671087	0.537648	0.453415	-0.0842329	hypomethylation	0.000203371	0.00470738
cg06673020	0.848151	0.787678	-0.0604739	hypomethylation	0.00454602	0.0123197
cg06680863	0.682635	0.607458	-0.0751766	hypomethylation	0.00643438	0.0143148
cg06683094	0.641268	0.58782	-0.0534488	hypomethylation	0.0304538	0.0350364
cg06686789	0.594178	0.543775	-0.0504026	hypomethylation	0.0152001	0.0225454
cg06705997	0.782158	0.723316	-0.0588419	hypomethylation	0.00684819	0.0148692
cg06708789	0.79169	0.855741	0.0640509	hypermethylation	0.00114254	0.00783153
cg06710071	0.383422	0.463467	0.0800455	hypermethylation	0.0487904	0.0498777
cg06728252	0.65498	0.720083	0.0651028	hypermethylation	0.0223328	0.0286485
cg06731572	0.767072	0.715626	-0.0514459	hypomethylation	0.00372236	0.0114806
cg06735285	0.733449	0.680858	-0.0525917	hypomethylation	0.0277434	0.0327853
cg06745968	0.920175	0.862902	-0.0572734	hypomethylation	0.0039752	0.0116665
cg06749803	0.298914	0.388215	0.0893008	hypermethylation	0.000954779	0.00751735
cg06754079	0.918035	0.858296	-0.0597388	hypomethylation	0.00078247	0.0069826
cg06757133	0.474062	0.416365	-0.0576973	hypomethylation	0.0472088	0.0485921
cg06759209	0.946309	0.888602	-0.0577069	hypomethylation	0.0244458	0.030204
cg06760111	0.377394	0.320274	-0.0571203	hypomethylation	0.0258743	0.0313248
cg06768088	0.76876	0.826826	0.058066	hypermethylation	0.00636187	0.0142422
cg06777273	0.765181	0.816138	0.0509562	hypermethylation	0.0389598	0.0420246
cg06787104	0.295248	0.351244	0.0559962	hypermethylation	0.0391411	0.0421065
cg06811094	0.395275	0.464762	0.0694869	hypermethylation	0.00970715	0.0177129
cg06815731	0.884401	0.830739	-0.0536623	hypomethylation	0.0100051	0.0179282
cg06820364	0.904157	0.843154	-0.0610026	hypomethylation	0.000350982	0.00567921
cg06825163	0.378396	0.284302	-0.0940947	hypomethylation	0.0198869	0.0267248
cg06836032	0.726343	0.673525	-0.0528179	hypomethylation	0.0189955	0.0259478
cg06841052	0.797473	0.849371	0.0518982	hypermethylation	0.0124299	0.0200132
cg06847624	0.50175	0.552509	0.0507591	hypermethylation	0.019408	0.0262696
cg06850787	0.748386	0.831565	0.0831793	hypermethylation	0.000787167	0.0069826
cg06859735	0.764124	0.709268	-0.0548561	hypomethylation	0.0110872	0.0189776
cg06867361	0.343663	0.286993	-0.0566695	hypomethylation	0.00649875	0.0143914
cg06867482	0.771593	0.821683	0.0500899	hypermethylation	0.0178642	0.0248602
cg06928346	0.319161	0.3755	0.0563391	hypermethylation	0.00244305	0.00995302
cg06931941	0.46036	0.510978	0.0506182	hypermethylation	0.00183906	0.00916986
cg06945179	0.869434	0.818824	-0.05061	hypomethylation	0.011837	0.0195194
cg06947608	0.559539	0.464609	-0.09493	hypomethylation	0.000146015	0.0040043
cg06952873	0.482855	0.427402	-0.0554529	hypomethylation	0.0422366	0.0444568
cg06961429	0.783642	0.717368	-0.0662743	hypomethylation	0.00317585	0.010812
cg06964132	0.737993	0.663652	-0.0743406	hypomethylation	0.0020241	0.00945841
cg06965839	0.525834	0.452701	-0.0731323	hypomethylation	0.00705892	0.0150549
cg06966082	0.803161	0.752679	-0.0504818	hypomethylation	0.0127803	0.0203694
cg07003993	0.468466	0.407461	-0.0610045	hypomethylation	0.00110891	0.00775568
cg07015465	0.920387	0.869847	-0.0505396	hypomethylation	0.00854533	0.0166872
cg07018760	0.402214	0.342771	-0.0594424	hypomethylation	0.0047341	0.0124671
cg07019386	0.764599	0.696753	-0.0678463	hypomethylation	0.00598329	0.0139004
cg07026904	0.561524	0.502407	-0.0591162	hypomethylation	0.0297108	0.0344645
cg07028733	0.603176	0.666081	0.0629059	hypermethylation	0.00987866	0.0178054
cg07038243	0.4742	0.417268	-0.0569316	hypomethylation	0.0487585	0.0498653
cg07042914	0.326562	0.267646	-0.0589156	hypomethylation	0.00133917	0.00820079
cg07054208	0.363275	0.310243	-0.0530319	hypomethylation	0.00400325	0.0116665
cg07059360	0.447398	0.383764	-0.0636345	hypomethylation	0.00248725	0.00995302
cg07074575	0.31873	0.241081	-0.0776496	hypomethylation	0.000176924	0.00425123
cg07099186	0.750023	0.690424	-0.0595989	hypomethylation	0.00329722	0.0110373
cg07110487	0.357139	0.297219	-0.0599199	hypomethylation	0.0102746	0.0182826
cg07120200	0.486537	0.427133	-0.0594037	hypomethylation	0.0178519	0.0248567
cg07127047	0.718926	0.66149	-0.0574361	hypomethylation	0.00458797	0.0123427
cg07128846	0.759969	0.708925	-0.051044	hypomethylation	0.0421111	0.0443617
cg07138399	0.690355	0.788899	0.0985436	hypermethylation	0.000927241	0.00749388
cg07170092	0.780982	0.728476	-0.0525064	hypomethylation	0.00778988	0.0158499
cg07171710	0.470564	0.414992	-0.0555719	hypomethylation	0.0118305	0.0195194
cg07180897	0.890181	0.773242	-0.116939	hypomethylation	0.0100707	0.0179947
cg07184316	0.900223	0.826043	-0.0741798	hypomethylation	0.00340796	0.0112431
cg07184807	0.612476	0.56126	-0.0512158	hypomethylation	0.0214361	0.0279183
cg07192748	0.432788	0.382745	-0.0500437	hypomethylation	0.0355757	0.0391612
cg07195319	0.338177	0.286778	-0.0513983	hypomethylation	0.0223465	0.0286485
cg07201475	0.385703	0.313611	-0.0720923	hypomethylation	0.00729143	0.0152793
cg07210187	0.866892	0.811252	-0.0556403	hypomethylation	0.0313582	0.0357186
cg07212142	0.798791	0.739185	-0.0596061	hypomethylation	0.0112565	0.0190846
cg07216976	0.183926	0.109647	-0.0742792	hypomethylation	0.00111537	0.00775568
cg07219227	0.694332	0.631457	-0.0628752	hypomethylation	0.000487462	0.00627463
cg07220450	0.858228	0.808125	-0.0501035	hypomethylation	0.00425414	0.0120067
cg07231451	0.888304	0.943119	0.0548156	hypermethylation	0.0181874	0.0251655
cg07233316	0.596387	0.534272	-0.0621151	hypomethylation	0.0054451	0.01336
cg07240206	0.268787	0.213146	-0.055641	hypomethylation	0.000826907	0.00708093
cg07244927	0.518623	0.455725	-0.0628984	hypomethylation	0.0195445	0.0264118
cg07249742	0.885331	0.824647	-0.0606841	hypomethylation	0.00105283	0.00755489
cg07305537	0.540208	0.479624	-0.0605841	hypomethylation	0.00889256	0.0170475
cg07308226	0.824504	0.759255	-0.0652494	hypomethylation	0.0208328	0.0273899
cg07320742	0.669114	0.619078	-0.0500355	hypomethylation	0.0012738	0.0081268
cg07332442	0.836426	0.903093	0.066667	hypermethylation	0.00297545	0.0106808
cg07336099	0.583314	0.52541	-0.0579042	hypomethylation	0.00673297	0.0146822
cg07336438	0.411434	0.333719	-0.0777145	hypomethylation	0.000764876	0.0069826
cg07366506	0.741055	0.804987	0.0639317	hypermethylation	0.0349838	0.0387634
cg07371589	0.802167	0.856708	0.0545405	hypermethylation	0.00154474	0.00871899
cg07376381	0.668734	0.720021	0.0512866	hypermethylation	0.0304066	0.0350013
cg07379813	0.436643	0.385272	-0.051371	hypomethylation	0.00453229	0.0123197
cg07397757	0.795799	0.874135	0.0783356	hypermethylation	0.0265247	0.0318152
cg07403525	0.486346	0.419825	-0.0665209	hypomethylation	0.0113426	0.019142
cg07412315	0.637654	0.701524	0.0638703	hypermethylation	0.0468532	0.0483479
cg07434457	0.551212	0.492237	-0.058975	hypomethylation	0.012406	0.0199875
cg07437919	0.403939	0.306893	-0.0970465	hypomethylation	2.01211e-07	0.000187599
cg07465864	0.313056	0.262985	-0.0500706	hypomethylation	0.0201261	0.0268939
cg07506503	0.767072	0.940922	0.17385	hypermethylation	0.0111392	0.0190279
cg07509935	0.104753	0.187743	0.0829902	hypermethylation	0.000533887	0.00638695
cg07522661	0.822469	0.767418	-0.0550509	hypomethylation	0.00989061	0.0178054
cg07526328	0.688101	0.611036	-0.0770659	hypomethylation	0.00841189	0.0165677
cg07530460	0.888742	0.960768	0.072026	hypermethylation	0.00502778	0.0128392
cg07541823	0.518916	0.46864	-0.0502758	hypomethylation	0.00423318	0.0120039
cg07547859	0.741226	0.686254	-0.0549723	hypomethylation	0.006061	0.0139711
cg07571531	0.497286	0.436759	-0.0605273	hypomethylation	0.0303366	0.0349814
cg07575970	0.872791	0.801589	-0.0712022	hypomethylation	0.00260241	0.0101083
cg07576664	0.576782	0.642657	0.0658749	hypermethylation	0.0450854	0.0468494
cg07583848	0.876775	0.790742	-0.0860332	hypomethylation	0.000196802	0.00459752
cg07593523	0.541336	0.595708	0.0543722	hypermethylation	0.0352373	0.0389529
cg07605566	0.587283	0.641796	0.0545124	hypermethylation	0.014179	0.0215503
cg07613115	0.632829	0.738595	0.105766	hypermethylation	0.00478847	0.0125325
cg07617736	0.326883	0.275186	-0.0516974	hypomethylation	0.0051665	0.0130216
cg07633530	0.66115	0.585706	-0.0754443	hypomethylation	0.0014217	0.00842614
cg07641662	0.200248	0.149941	-0.050307	hypomethylation	0.000395508	0.00612188
cg07655627	0.128764	0.204817	0.0760535	hypermethylation	0.0078487	0.015883
cg07670421	0.855786	0.79768	-0.058106	hypomethylation	0.0061747	0.0141165
cg07684583	0.873357	0.822429	-0.0509271	hypomethylation	0.0162753	0.0235315
cg07694864	0.14522	0.220741	0.075521	hypermethylation	0.00080579	0.00705896
cg07695058	0.48827	0.430757	-0.0575135	hypomethylation	0.0094575	0.0175968
cg07738651	0.460698	0.391056	-0.0696413	hypomethylation	0.00101414	0.00752456
cg07740095	0.399599	0.339397	-0.0602021	hypomethylation	0.00998848	0.0179111
cg07769957	0.462117	0.514954	0.0528368	hypermethylation	0.0021842	0.00973628
cg07775309	0.227206	0.172153	-0.0550531	hypomethylation	0.0354281	0.039084
cg07778935	0.472757	0.411194	-0.0615629	hypomethylation	0.0112586	0.0190846
cg07780348	0.515152	0.577296	0.0621442	hypermethylation	0.0341076	0.0380431
cg07785144	0.765398	0.70727	-0.0581281	hypomethylation	0.00147855	0.00853636
cg07787354	0.741956	0.637846	-0.10411	hypomethylation	8.57621e-07	0.000326991
cg07791547	0.250345	0.194222	-0.0561228	hypomethylation	0.000166588	0.00424547
cg07793724	0.616602	0.537514	-0.0790887	hypomethylation	0.0348373	0.0386417
cg07798610	0.384057	0.450928	0.0668701	hypermethylation	0.0140192	0.0213977
cg07828189	0.512135	0.451654	-0.0604813	hypomethylation	0.0108949	0.0188143
cg07832006	0.479395	0.536342	0.056947	hypermethylation	0.0182305	0.0251655
cg07848310	0.202026	0.299813	0.0977875	hypermethylation	0.0107104	0.0185986
cg07856962	0.437607	0.500582	0.0629749	hypermethylation	0.00372788	0.0114806
cg07861198	0.523597	0.455903	-0.067694	hypomethylation	0.000775173	0.0069826
cg07876788	0.558136	0.459049	-0.0990866	hypomethylation	0.00735804	0.0153424
cg07883894	0.394655	0.319188	-0.0754665	hypomethylation	0.000640009	0.00665674
cg07884019	0.525449	0.459251	-0.0661983	hypomethylation	0.00954212	0.0176389
cg07889765	0.587037	0.672412	0.085375	hypermethylation	0.0112132	0.0190767
cg07895523	0.247096	0.172099	-0.0749976	hypomethylation	0.000891714	0.00735227
cg07906239	0.646753	0.588077	-0.0586758	hypomethylation	0.00989423	0.0178054
cg07909165	0.399183	0.330268	-0.0689152	hypomethylation	0.0117773	0.0194946
cg07911664	0.310076	0.24536	-0.0647161	hypomethylation	0.00882154	0.0169947
cg07925670	0.445516	0.394242	-0.0512742	hypomethylation	0.0136297	0.0210194
cg07938480	0.533869	0.480869	-0.0529996	hypomethylation	0.0176628	0.0247078
cg07941396	0.468238	0.41122	-0.0570184	hypomethylation	0.00814307	0.0162797
cg07943849	0.811518	0.75607	-0.0554487	hypomethylation	0.00676239	0.0147209
cg07953867	0.489421	0.406049	-0.0833717	hypomethylation	0.00652287	0.0144108
cg07955367	0.845594	0.78844	-0.0571538	hypomethylation	0.0257015	0.0312505
cg07968760	0.415	0.485577	0.0705774	hypermethylation	0.0103318	0.0183056
cg07972427	0.652493	0.594824	-0.057669	hypomethylation	0.0151596	0.0225192
cg07972716	0.515775	0.464226	-0.051549	hypomethylation	0.00692753	0.0149258
cg07974627	0.651622	0.590296	-0.0613263	hypomethylation	0.02171	0.0281906
cg07978718	0.4575	0.393735	-0.0637654	hypomethylation	0.0232127	0.0293562
cg08004926	0.358183	0.300533	-0.0576508	hypomethylation	0.00178854	0.00912446
cg08005660	0.36665	0.311943	-0.0547069	hypomethylation	0.0300407	0.0347513
cg08009458	0.934076	0.882493	-0.0515836	hypomethylation	0.0109509	0.0188504
cg08027620	0.363669	0.305417	-0.0582517	hypomethylation	0.00118181	0.00792126
cg08071142	0.670683	0.602579	-0.0681038	hypomethylation	0.000936633	0.00749388
cg08072119	0.897725	0.846898	-0.0508273	hypomethylation	0.00490391	0.0126925
cg08078339	0.906183	0.84719	-0.0589928	hypomethylation	0.00151487	0.00860816
cg08096851	0.246679	0.194067	-0.052612	hypomethylation	0.00111725	0.00775568
cg08106415	0.373197	0.319836	-0.0533613	hypomethylation	0.0119948	0.0196003
cg08112929	0.538682	0.589504	0.0508222	hypermethylation	0.0305402	0.0351038
cg08121160	0.313222	0.257283	-0.0559391	hypomethylation	0.00109511	0.00773942
cg08122472	0.653279	0.60212	-0.0511596	hypomethylation	0.00994636	0.017861
cg08124156	0.82048	0.7643	-0.0561795	hypomethylation	0.0202721	0.0270187
cg08124399	0.805621	0.864074	0.0584527	hypermethylation	0.0472097	0.0485921
cg08133496	0.398166	0.346878	-0.0512876	hypomethylation	0.00240503	0.00995302
cg08149328	0.150413	0.0981234	-0.05229	hypomethylation	0.0169748	0.0242099
cg08151651	0.630787	0.577227	-0.0535607	hypomethylation	0.0155187	0.0228366
cg08164906	0.171302	0.120358	-0.0509442	hypomethylation	0.00948003	0.0176145
cg08168669	0.185256	0.135031	-0.0502249	hypomethylation	0.00281393	0.0104906
cg08173263	0.344782	0.289595	-0.0551866	hypomethylation	0.0102896	0.0182826
cg08173730	0.663488	0.612391	-0.0510965	hypomethylation	0.0262896	0.0316302
cg08190298	0.507493	0.45675	-0.050743	hypomethylation	0.0143067	0.0216624
cg08195415	0.420848	0.34916	-0.0716881	hypomethylation	0.00484163	0.0126062
cg08203479	0.504207	0.451921	-0.0522859	hypomethylation	0.03737	0.0407453
cg08213398	0.663672	0.612154	-0.0515188	hypomethylation	0.00918005	0.0173395
cg08228850	0.499939	0.434985	-0.0649538	hypomethylation	0.0240825	0.0299458
cg08234689	0.619216	0.670312	0.051096	hypermethylation	0.0282576	0.0332882
cg08237401	0.32582	0.272966	-0.0528541	hypomethylation	0.0122354	0.0198138
cg08240913	0.367528	0.300725	-0.0668028	hypomethylation	0.00754451	0.0155714
cg08240917	0.904112	0.789429	-0.114683	hypomethylation	0.0231333	0.0292999
cg08254359	0.302836	0.25229	-0.0505464	hypomethylation	0.0378575	0.0411243
cg08263875	0.620922	0.676766	0.0558437	hypermethylation	0.00960168	0.0176949
cg08265451	0.831239	0.777409	-0.0538301	hypomethylation	0.00064858	0.00665674
cg08283359	0.315162	0.261322	-0.0538395	hypomethylation	0.0120678	0.0196559
cg08290471	0.830179	0.778673	-0.0515059	hypomethylation	0.00568919	0.0135798
cg08291335	0.697876	0.761599	0.0637233	hypermethylation	0.0158405	0.0230882
cg08310581	0.443137	0.507188	0.0640509	hypermethylation	0.00287541	0.0105814
cg08311343	0.72898	0.796101	0.0671208	hypermethylation	0.000442629	0.00613812
cg08325413	0.834847	0.777232	-0.0576154	hypomethylation	0.00395123	0.0116665
cg08328067	0.557662	0.495884	-0.0617778	hypomethylation	0.00705902	0.0150549
cg08350889	0.364853	0.306524	-0.0583293	hypomethylation	0.00431835	0.0120521
cg08369164	0.485475	0.431084	-0.054392	hypomethylation	0.0164352	0.0236749
cg08376325	0.356732	0.30114	-0.0555915	hypomethylation	0.0206453	0.0272622
cg08390994	0.282983	0.23093	-0.052053	hypomethylation	0.0396457	0.04251
cg08430157	0.84797	0.788222	-0.0597479	hypomethylation	0.0106297	0.0185213
cg08431893	0.503074	0.574335	0.0712607	hypermethylation	0.0405263	0.0432155
cg08431931	0.22191	0.273592	0.0516821	hypermethylation	0.0408454	0.0435006
cg08444117	0.609073	0.678076	0.0690038	hypermethylation	0.0206283	0.0272622
cg08460285	0.784235	0.843302	0.059067	hypermethylation	0.00128186	0.00814217
cg08460875	0.724049	0.672344	-0.0517052	hypomethylation	0.00738367	0.0153686
cg08471713	0.292755	0.183121	-0.109633	hypomethylation	0.0037313	0.0114806
cg08473764	0.821145	0.889078	0.0679329	hypermethylation	0.00025772	0.00500174
cg08483768	0.562298	0.48967	-0.0726282	hypomethylation	0.000252527	0.00500174
cg08490751	0.44297	0.512911	0.069941	hypermethylation	0.00631963	0.0142032
cg08530537	0.581046	0.639388	0.0583416	hypermethylation	0.00527788	0.0131643
cg08563318	0.705711	0.645317	-0.0603935	hypomethylation	0.00587941	0.013786
cg08617160	0.568474	0.63679	0.0683163	hypermethylation	0.0229712	0.0292431
cg08620329	0.6756	0.750591	0.0749913	hypermethylation	0.00123334	0.00805495
cg08623979	0.701362	0.648072	-0.0532905	hypomethylation	0.0144905	0.0218287
cg08633479	0.639258	0.713744	0.0744853	hypermethylation	0.00362053	0.0114567
cg08644860	0.601462	0.545148	-0.0563136	hypomethylation	0.0025234	0.00995302
cg08659204	0.520271	0.582676	0.062405	hypermethylation	0.00735008	0.0153424
cg08667682	0.810765	0.866826	0.0560609	hypermethylation	0.0175534	0.0246588
cg08668113	0.515111	0.45154	-0.0635712	hypomethylation	0.00666271	0.0145865
cg08668247	0.209664	0.147808	-0.0618556	hypomethylation	0.000693376	0.00672842
cg08668544	0.926524	0.874126	-0.0523982	hypomethylation	0.00954513	0.0176389
cg08671460	0.233521	0.180935	-0.0525862	hypomethylation	0.000689863	0.00672842
cg08687025	0.483092	0.42958	-0.053512	hypomethylation	0.0418067	0.0442192
cg08717880	0.507911	0.452234	-0.0556772	hypomethylation	0.00399677	0.0116665
cg08724891	0.32475	0.271874	-0.0528756	hypomethylation	0.038817	0.0419243
cg08749656	0.554704	0.496121	-0.0585825	hypomethylation	0.031095	0.0354799
cg08766211	0.892656	0.840197	-0.0524597	hypomethylation	0.0374351	0.0407986
cg08770311	0.825072	0.756307	-0.0687652	hypomethylation	0.0126516	0.0202796
cg08776296	0.844648	0.705848	-0.1388	hypomethylation	0.00732473	0.0153143
cg08790320	0.325193	0.263199	-0.0619944	hypomethylation	0.00639165	0.0142709
cg08804297	0.868657	0.811306	-0.0573516	hypomethylation	0.0182333	0.0251655
cg08841786	0.745154	0.798047	0.052893	hypermethylation	0.00197163	0.00942127
cg08866497	0.641482	0.58526	-0.0562218	hypomethylation	0.0150852	0.0224543
cg08871495	0.576866	0.510192	-0.0666736	hypomethylation	0.0324265	0.0366667
cg08874599	0.812731	0.751907	-0.0608235	hypomethylation	0.000452844	0.00620938
cg08884727	0.839382	0.788982	-0.0503999	hypomethylation	0.00762184	0.0156595
cg08899523	0.533068	0.407255	-0.125813	hypomethylation	0.00948099	0.0176145
cg08899920	0.308176	0.256599	-0.0515779	hypomethylation	0.00593386	0.0138243
cg08914627	0.788903	0.732915	-0.0559871	hypomethylation	0.0113237	0.0191337
cg08923894	0.816417	0.880359	0.0639425	hypermethylation	0.00925048	0.0173994
cg08926642	0.735474	0.814415	0.0789404	hypermethylation	0.000858792	0.00717461
cg08945331	0.357591	0.307267	-0.0503241	hypomethylation	0.00835465	0.0164936
cg08946103	0.474027	0.41787	-0.0561575	hypomethylation	0.0403765	0.0430922
cg08967338	0.354292	0.290968	-0.0633244	hypomethylation	0.0117618	0.0194928
cg08984179	0.818043	0.762911	-0.0551312	hypomethylation	0.00190047	0.00929705
cg08993878	0.514458	0.430512	-0.0839468	hypomethylation	0.0325711	0.0367353
cg08996805	0.497399	0.565205	0.0678059	hypermethylation	0.0130563	0.0205809
cg09000155	0.152294	0.0998381	-0.052456	hypomethylation	0.00224235	0.00977469
cg09036531	0.582572	0.513504	-0.0690686	hypomethylation	3.5679e-05	0.00264759
cg09039751	0.69969	0.755088	0.0553978	hypermethylation	0.0197063	0.0265614
cg09039782	0.185197	0.242846	0.0576491	hypermethylation	0.00398596	0.0116665
cg09044981	0.77054	0.693871	-0.0766685	hypomethylation	0.0230227	0.0292773
cg09045363	0.202624	0.148895	-0.0537296	hypomethylation	0.0125597	0.0201578
cg09056876	0.701078	0.7547	0.0536212	hypermethylation	0.00710442	0.0150807
cg09057685	0.485936	0.434032	-0.0519033	hypomethylation	0.016996	0.0242128
cg09085358	0.540886	0.485011	-0.0558748	hypomethylation	0.00201727	0.00945841
cg09085594	0.638321	0.579863	-0.0584578	hypomethylation	0.00756261	0.0155714
cg09101205	0.54271	0.466303	-0.0764068	hypomethylation	0.00276228	0.010433
cg09102037	0.803394	0.749989	-0.0534043	hypomethylation	0.0419604	0.0442954
cg09107055	0.513051	0.441828	-0.0712227	hypomethylation	0.00274641	0.0104042
cg09109730	0.558383	0.498988	-0.0593948	hypomethylation	0.019211	0.0261344
cg09135656	0.614049	0.664642	0.050593	hypermethylation	0.0130825	0.0206037
cg09136950	0.542214	0.491544	-0.0506703	hypomethylation	0.0270662	0.0321506
cg09150734	0.927749	0.863324	-0.064425	hypomethylation	0.00823428	0.0163971
cg09166085	0.130821	0.193106	0.0622853	hypermethylation	0.00712492	0.0150807
cg09190807	0.64024	0.703453	0.0632127	hypermethylation	0.0228729	0.0291457
cg09210755	0.271481	0.221275	-0.0502062	hypomethylation	0.000760763	0.0069826
cg09214243	0.536414	0.600031	0.0636176	hypermethylation	0.0128396	0.020408
cg09233300	0.943609	0.88551	-0.0580994	hypomethylation	0.00316329	0.010812
cg09234764	0.633354	0.571819	-0.0615348	hypomethylation	0.0110872	0.0189776
cg09243359	0.864873	0.807509	-0.0573631	hypomethylation	0.00288378	0.0105814
cg09246479	0.711139	0.764036	0.0528975	hypermethylation	0.000402774	0.00613812
cg09256477	0.722284	0.650832	-0.0714519	hypomethylation	0.000147798	0.0040096
cg09294573	0.485902	0.422339	-0.0635637	hypomethylation	0.0489892	0.0499989
cg09317728	0.435262	0.359402	-0.0758603	hypomethylation	0.000285048	0.00518472
cg09319063	0.51479	0.456758	-0.0580322	hypomethylation	0.000667521	0.00665674
cg09321086	0.845383	0.794861	-0.0505227	hypomethylation	0.0102837	0.0182826
cg09329516	0.48974	0.560873	0.071133	hypermethylation	0.0211703	0.0276463
cg09351848	0.887744	0.830954	-0.0567901	hypomethylation	0.00101244	0.00752456
cg09366265	0.224215	0.169178	-0.0550371	hypomethylation	0.000632343	0.00665674
cg09370496	0.838472	0.775521	-0.0629515	hypomethylation	0.00216126	0.00971221
cg09374031	0.392946	0.333814	-0.0591322	hypomethylation	0.0220686	0.0284658
cg09381706	0.885355	0.819646	-0.0657097	hypomethylation	0.000642283	0.00665674
cg09389201	0.702162	0.650478	-0.0516839	hypomethylation	0.000941561	0.00749388
cg09390319	0.528119	0.584886	0.0567673	hypermethylation	0.0117488	0.0194886
cg09396832	0.828365	0.7689	-0.0594652	hypomethylation	0.0039336	0.0116665
cg09415825	0.280966	0.227843	-0.053123	hypomethylation	0.00975159	0.0177129
cg09426508	0.372075	0.312486	-0.059589	hypomethylation	0.00366714	0.0114567
cg09461728	0.305943	0.252621	-0.0533215	hypomethylation	0.00258759	0.0100984
cg09489435	0.633691	0.556769	-0.0769229	hypomethylation	0.00973245	0.0177129
cg09492774	0.277824	0.227664	-0.0501595	hypomethylation	1.92433e-05	0.00242755
cg09508496	0.138442	0.220821	0.0823787	hypermethylation	0.00579703	0.0137292
cg09508668	0.617718	0.551096	-0.0666215	hypomethylation	0.00896698	0.0171262
cg09544050	0.454775	0.539146	0.0843707	hypermethylation	0.00197696	0.00942886
cg09552548	0.417444	0.352371	-0.0650729	hypomethylation	0.0352475	0.0389529
cg09556999	0.820053	0.768322	-0.0517312	hypomethylation	0.00935695	0.0175001
cg09568217	0.564721	0.618815	0.0540943	hypermethylation	0.00526317	0.0131643
cg09584060	0.840271	0.77605	-0.0642203	hypomethylation	0.000914627	0.00746797
cg09602803	0.442715	0.50686	0.0641445	hypermethylation	0.0353376	0.0390354
cg09613853	0.891696	0.819351	-0.0723454	hypomethylation	0.00584481	0.0137453
cg09619624	0.660809	0.722328	0.0615187	hypermethylation	0.0114644	0.0191943
cg09624870	0.581137	0.518498	-0.0626389	hypomethylation	0.000955759	0.00751735
cg09626521	0.186331	0.133489	-0.0528428	hypomethylation	0.00364498	0.0114567
cg09636245	0.444778	0.386439	-0.0583387	hypomethylation	0.0113853	0.0191693
cg09652312	0.523312	0.597193	0.0738803	hypermethylation	0.00426076	0.0120067
cg09655403	0.77004	0.827587	0.0575473	hypermethylation	0.00383994	0.0116165
cg09657260	0.750791	0.692187	-0.0586039	hypomethylation	0.0105134	0.0184552
cg09669754	0.644635	0.698531	0.0538954	hypermethylation	0.0104184	0.0184064
cg09678707	0.733494	0.681116	-0.0523789	hypomethylation	0.0118649	0.0195194
cg09733528	0.721448	0.615627	-0.105821	hypomethylation	0.0236617	0.029583
cg09737019	0.566169	0.50527	-0.060899	hypomethylation	0.0084956	0.0166546
cg09739413	0.544082	0.607581	0.0634983	hypermethylation	0.0442835	0.0462447
cg09756125	0.735613	0.586125	-0.149488	hypomethylation	0.0101939	0.018189
cg09765747	0.467243	0.404235	-0.0630073	hypomethylation	0.000708272	0.00679457
cg09766820	0.258768	0.183842	-0.0749255	hypomethylation	0.0063219	0.0142032
cg09770131	0.623116	0.718059	0.0949425	hypermethylation	0.000435868	0.00613812
cg09773141	0.954866	0.901947	-0.0529184	hypomethylation	0.0177308	0.0247427
cg09781168	0.871646	0.790261	-0.0813845	hypomethylation	0.000176611	0.00425123
cg09786634	0.298506	0.237511	-0.0609948	hypomethylation	0.0051994	0.0130528
cg09792000	0.479267	0.383868	-0.0953992	hypomethylation	0.000116486	0.00372017
cg09802689	0.939386	0.888117	-0.0512687	hypomethylation	0.0317621	0.0360647
cg09811860	0.548937	0.491907	-0.0570299	hypomethylation	0.00354135	0.011411
cg09825488	0.267713	0.209144	-0.0585695	hypomethylation	0.00510704	0.0129628
cg09831645	0.0319921	0.1084	0.0764079	hypermethylation	0.0287464	0.0337023
cg09838168	0.260552	0.204618	-0.055934	hypomethylation	0.00430061	0.0120467
cg09847728	0.854831	0.919708	0.0648769	hypermethylation	0.0114848	0.0192022
cg09864076	0.607916	0.552452	-0.0554646	hypomethylation	0.0315354	0.0358719
cg09864245	0.251349	0.193692	-0.057657	hypomethylation	0.00359772	0.0114567
cg09881842	0.727274	0.778235	0.0509605	hypermethylation	0.00650266	0.0143914
cg09893703	0.716955	0.649081	-0.067874	hypomethylation	0.020526	0.0271992
cg09919392	0.497825	0.442086	-0.0557391	hypomethylation	0.00658739	0.0144792
cg09928736	0.869879	0.80979	-0.0600892	hypomethylation	0.00545894	0.01336
cg09929782	0.868849	0.81447	-0.0543786	hypomethylation	0.00249381	0.00995302
cg09936146	0.791465	0.735728	-0.0557373	hypomethylation	0.000770809	0.0069826
cg09940161	0.490448	0.422695	-0.0677539	hypomethylation	0.00212557	0.00964534
cg09955645	0.480216	0.542547	0.0623306	hypermethylation	0.0265261	0.0318152
cg10012448	0.75635	0.693921	-0.0624286	hypomethylation	0.000623512	0.00665674
cg10015078	0.857673	0.797088	-0.0605852	hypomethylation	0.0120458	0.0196328
cg10015091	0.443569	0.387768	-0.0558009	hypomethylation	0.0213542	0.0278519
cg10072237	0.237507	0.162043	-0.0754634	hypomethylation	0.0381206	0.0413315
cg10073842	0.26074	0.209018	-0.0517227	hypomethylation	0.000380748	0.00600392
cg10091265	0.503556	0.452416	-0.0511401	hypomethylation	0.0296975	0.0344645
cg10092265	0.458793	0.515005	0.0562122	hypermethylation	0.00287003	0.0105814
cg10122079	0.209773	0.158297	-0.0514762	hypomethylation	0.0129458	0.0204779
cg10123347	0.178637	0.122096	-0.0565414	hypomethylation	8.81641e-05	0.00334566
cg10124928	0.876282	0.815767	-0.0605147	hypomethylation	6.7246e-05	0.0032687
cg10132208	0.221131	0.272611	0.0514797	hypermethylation	0.00548635	0.013374
cg10145000	0.338773	0.282368	-0.0564052	hypomethylation	0.0118667	0.0195194
cg10162971	0.838916	0.763996	-0.07492	hypomethylation	0.00144002	0.00846892
cg10185505	0.756309	0.852683	0.0963743	hypermethylation	0.0310579	0.0354799
cg10194352	0.586351	0.534191	-0.0521599	hypomethylation	0.0171466	0.0243586
cg10199168	0.725891	0.789727	0.0638355	hypermethylation	0.00398676	0.0116665
cg10204106	0.3828	0.329975	-0.0528251	hypomethylation	0.00256594	0.0100682
cg10208897	0.663163	0.73381	0.0706471	hypermethylation	0.00828585	0.016422
cg10210594	0.112006	0.181858	0.0698517	hypermethylation	0.0131807	0.0206938
cg10212854	0.461122	0.387159	-0.0739629	hypomethylation	0.0176767	0.0247078
cg10214754	0.751231	0.687717	-0.0635138	hypomethylation	0.0206493	0.0272622
cg10220449	0.585676	0.663039	0.077363	hypermethylation	0.0105322	0.0184552
cg10231049	0.493806	0.44174	-0.0520662	hypomethylation	0.0111739	0.0190444
cg10238051	0.757762	0.808642	0.0508803	hypermethylation	0.0314297	0.0357839
cg10244976	0.714407	0.764746	0.0503387	hypermethylation	0.00376243	0.0115202
cg10249828	0.37812	0.325704	-0.0524161	hypomethylation	0.0150848	0.0224543
cg10249983	0.449741	0.607905	0.158165	hypermethylation	0.00125855	0.00811527
cg10258929	0.630026	0.569697	-0.0603297	hypomethylation	0.00781908	0.015883
cg10265351	0.58567	0.519201	-0.0664697	hypomethylation	0.00515821	0.0130142
cg10276968	0.187598	0.134339	-0.0532588	hypomethylation	0.00841058	0.0165677
cg10283695	0.419716	0.366624	-0.0530925	hypomethylation	0.0236605	0.029583
cg10301258	0.723757	0.667766	-0.0559902	hypomethylation	0.00365274	0.0114567
cg10302336	0.48803	0.434651	-0.0533789	hypomethylation	2.49567e-05	0.00252693
cg10304824	0.378579	0.325002	-0.053577	hypomethylation	0.0139082	0.0212927
cg10306051	0.715685	0.662302	-0.053383	hypomethylation	0.0266166	0.0318521
cg10319545	0.842786	0.788638	-0.0541479	hypomethylation	0.0255005	0.031081
cg10327440	0.249102	0.181844	-0.0672577	hypomethylation	0.0169141	0.0241507
cg10330056	0.36547	0.31422	-0.0512504	hypomethylation	0.0359333	0.0394866
cg10331082	0.587868	0.537358	-0.0505097	hypomethylation	0.00326319	0.0110067
cg10335112	0.770639	0.720354	-0.0502852	hypomethylation	0.000445041	0.00613812
cg10351795	0.642295	0.576141	-0.0661542	hypomethylation	1.67431e-05	0.00242755
cg10372695	0.562075	0.509551	-0.0525236	hypomethylation	0.000820257	0.00708093
cg10372770	0.648328	0.724712	0.0763844	hypermethylation	0.00592457	0.0138243
cg10403849	0.418126	0.362253	-0.0558733	hypomethylation	0.0189451	0.025925
cg10408284	0.744387	0.800332	0.0559448	hypermethylation	0.00367175	0.0114567
cg10410412	0.762557	0.712238	-0.0503191	hypomethylation	0.0296391	0.034413
cg10420854	0.337563	0.252649	-0.0849144	hypomethylation	0.0114364	0.0191943
cg10442355	0.761572	0.816423	0.0548516	hypermethylation	0.00164966	0.00891242
cg10449961	0.744783	0.806296	0.061513	hypermethylation	0.000569926	0.00649513
cg10454127	0.588871	0.537717	-0.051154	hypomethylation	0.00385464	0.0116192
cg10462503	0.829307	0.778377	-0.0509301	hypomethylation	0.0266339	0.0318521
cg10478584	0.345061	0.280656	-0.0644041	hypomethylation	0.0026839	0.0103067
cg10488199	0.794642	0.739171	-0.0554715	hypomethylation	0.0470126	0.0484727
cg10506618	0.569468	0.449115	-0.120354	hypomethylation	9.07228e-07	0.000326991
cg10528576	0.464538	0.516879	0.0523413	hypermethylation	0.0144121	0.0217417
cg10531352	0.769213	0.699267	-0.0699457	hypomethylation	0.000766738	0.0069826
cg10547329	0.755836	0.605697	-0.150139	hypomethylation	0.021961	0.0283705
cg10556798	0.784211	0.730665	-0.0535461	hypomethylation	0.00878821	0.0169645
cg10573505	0.605706	0.668335	0.0626291	hypermethylation	0.0257674	0.0313044
cg10578782	0.639533	0.576536	-0.0629975	hypomethylation	0.0173108	0.0244535
cg10579012	0.25866	0.207235	-0.0514251	hypomethylation	0.00396263	0.0116665
cg10580144	0.0971299	0.147474	0.0503437	hypermethylation	0.00384525	0.0116186
cg10587895	0.815469	0.752981	-0.062488	hypomethylation	0.00259454	0.0101019
cg10604476	0.469246	0.543149	0.0739027	hypermethylation	0.0387502	0.0418735
cg10609256	0.707783	0.64244	-0.0653437	hypomethylation	0.0238057	0.0296895
cg10612452	0.106429	0.157969	0.05154	hypermethylation	0.0156311	0.022902
cg10622551	0.308181	0.391248	0.0830662	hypermethylation	0.00368345	0.0114567
cg10632760	0.854669	0.801562	-0.0531064	hypomethylation	0.00494473	0.0127432
cg10639395	0.368442	0.303759	-0.0646834	hypomethylation	0.00727384	0.0152678
cg10643333	0.718724	0.662083	-0.0566408	hypomethylation	0.00148526	0.00855551
cg10650127	0.75009	0.695554	-0.0545366	hypomethylation	0.00122255	0.0080535
cg10656869	0.702736	0.650498	-0.052238	hypomethylation	0.00189046	0.00929705
cg10665071	0.840404	0.917335	0.0769312	hypermethylation	0.0357265	0.0393101
cg10676327	0.691042	0.767282	0.0762404	hypermethylation	0.00466253	0.0124219
cg10676574	0.678199	0.588737	-0.089462	hypomethylation	0.00472519	0.0124671
cg10678190	0.723427	0.652475	-0.0709519	hypomethylation	0.00289804	0.0105814
cg10694470	0.305643	0.244005	-0.061638	hypomethylation	0.0113891	0.0191693
cg10694833	0.839926	0.787853	-0.0520735	hypomethylation	0.00158656	0.00873074
cg10719029	0.229064	0.175752	-0.0533125	hypomethylation	0.00200347	0.00945841
cg10742917	0.364018	0.414256	0.050238	hypermethylation	0.0339463	0.03788
cg10757433	0.374585	0.319413	-0.0551722	hypomethylation	0.00110701	0.00775568
cg10773372	0.867382	0.815698	-0.0516836	hypomethylation	0.00499232	0.0127926
cg10786767	0.541063	0.47297	-0.0680926	hypomethylation	0.00713755	0.0150948
cg10792302	0.314608	0.263952	-0.0506564	hypomethylation	0.0314915	0.035838
cg10815657	0.64643	0.714582	0.0681513	hypermethylation	0.0211148	0.0276194
cg10821226	0.286884	0.339249	0.0523644	hypermethylation	0.0134881	0.0209032
cg10833066	0.411668	0.508775	0.0971078	hypermethylation	0.00253441	0.00996058
cg10836639	0.517898	0.458776	-0.0591219	hypomethylation	0.00499433	0.0127926
cg10846936	0.65247	0.586742	-0.065728	hypomethylation	0.00104105	0.00752599
cg10871071	0.564994	0.617988	0.0529932	hypermethylation	0.0267846	0.0319515
cg10872641	0.620914	0.685647	0.0647331	hypermethylation	0.0209846	0.0275354
cg10884544	0.676117	0.602823	-0.0732939	hypomethylation	0.00375313	0.0115057
cg10886095	0.547744	0.485141	-0.0626026	hypomethylation	0.00492005	0.0126925
cg10899018	0.442987	0.389024	-0.0539633	hypomethylation	0.0489272	0.0499568
cg10906729	0.526426	0.59697	0.0705438	hypermethylation	0.00859829	0.0167293
cg10917109	0.391505	0.340166	-0.0513384	hypomethylation	0.00560828	0.0135274
cg10926700	0.860755	0.803086	-0.0576682	hypomethylation	0.00582253	0.0137292
cg10931792	0.721131	0.771334	0.0502024	hypermethylation	0.0371401	0.0405297
cg10937743	0.435008	0.364624	-0.0703842	hypomethylation	0.00578743	0.0137292
cg10940023	0.469923	0.417926	-0.0519973	hypomethylation	0.00695695	0.0149529
cg10946644	0.232171	0.170686	-0.0614851	hypomethylation	0.00065328	0.00665674
cg10969346	0.907768	0.857755	-0.0500135	hypomethylation	0.0450302	0.0468365
cg10976269	0.567842	0.513322	-0.0545203	hypomethylation	0.0258003	0.0313103
cg10995206	0.746148	0.686263	-0.0598847	hypomethylation	0.000621767	0.00665674
cg10996467	0.858677	0.910144	0.0514675	hypermethylation	0.000611438	0.00665674
cg11003530	0.408361	0.353537	-0.0548239	hypomethylation	0.0172628	0.0244411
cg11003814	0.350031	0.285472	-0.0645584	hypomethylation	0.0145153	0.0218424
cg11015251	0.39342	0.454992	0.0615714	hypermethylation	0.00369152	0.0114567
cg11019172	0.841216	0.895682	0.0544659	hypermethylation	0.000137601	0.00390076
cg11023668	0.609892	0.669211	0.0593182	hypermethylation	0.0179269	0.0248925
cg11028443	0.914494	0.85144	-0.0630538	hypomethylation	0.000546802	0.00638695
cg11048148	0.810911	0.757871	-0.0530391	hypomethylation	0.00800494	0.0160672
cg11059159	0.284859	0.375018	0.0901591	hypermethylation	0.0246371	0.0303949
cg11070989	0.210579	0.144324	-0.066255	hypomethylation	0.0146374	0.021943
cg11072540	0.540008	0.476238	-0.0637706	hypomethylation	0.00630081	0.0141942
cg11075718	0.639131	0.576774	-0.0623576	hypomethylation	0.00724254	0.0152165
cg11077310	0.730071	0.656637	-0.0734348	hypomethylation	0.00061624	0.00665674
cg11078654	0.925314	0.859712	-0.0656022	hypomethylation	0.00358789	0.0114567
cg11095247	0.745834	0.687149	-0.0586849	hypomethylation	0.020374	0.02708
cg11096515	0.451429	0.395754	-0.0556751	hypomethylation	0.0153888	0.0227319
cg11103390	0.282657	0.340203	0.0575464	hypermethylation	0.0294444	0.034249
cg11106255	0.900448	0.953053	0.0526053	hypermethylation	0.0211309	0.0276194
cg11107657	0.501056	0.441318	-0.059738	hypomethylation	0.00103075	0.00752456
cg11113589	0.327332	0.276696	-0.0506363	hypomethylation	0.00709813	0.0150807
cg11120805	0.518482	0.464308	-0.0541734	hypomethylation	0.0234081	0.0294557
cg11123744	0.481249	0.572013	0.0907646	hypermethylation	0.000776531	0.0069826
cg11127112	0.671861	0.616924	-0.0549366	hypomethylation	0.00182831	0.00915462
cg11137145	0.54959	0.498217	-0.051373	hypomethylation	0.0387533	0.0418735
cg11140086	0.39691	0.457459	0.0605485	hypermethylation	0.00324444	0.0109876
cg11173769	0.508173	0.427384	-0.0807896	hypomethylation	0.00783834	0.015883
cg11193064	0.470984	0.555205	0.0842205	hypermethylation	0.026072	0.0314585
cg11207307	0.104272	0.156207	0.0519351	hypermethylation	0.00688238	0.0148823
cg11210069	0.678561	0.580971	-0.09759	hypomethylation	0.000393913	0.00612188
cg11229771	0.748218	0.811531	0.0633134	hypermethylation	0.00114479	0.00783153
cg11234688	0.43651	0.502406	0.0658955	hypermethylation	0.0201464	0.0268939
cg11238792	0.747889	0.689681	-0.0582079	hypomethylation	0.0127608	0.0203512
cg11241151	0.704706	0.620651	-0.0840551	hypomethylation	0.00436584	0.0121177
cg11264363	0.750873	0.821962	0.0710891	hypermethylation	0.000811023	0.00705896
cg11265839	0.509339	0.43537	-0.073969	hypomethylation	0.0234464	0.0294745
cg11273953	0.510037	0.435784	-0.0742524	hypomethylation	0.00575586	0.013688
cg11300809	0.416222	0.358125	-0.0580969	hypomethylation	0.00106794	0.00763292
cg11305781	0.423485	0.367419	-0.0560667	hypomethylation	0.00831601	0.0164559
cg11351987	0.598217	0.531514	-0.0667023	hypomethylation	0.014582	0.0219098
cg11353548	0.942442	0.888128	-0.0543145	hypomethylation	0.0134188	0.020847
cg11372818	0.737922	0.789434	0.0515126	hypermethylation	0.0378644	0.0411243
cg11417259	0.529004	0.583521	0.054517	hypermethylation	0.00397651	0.0116665
cg11423224	0.586394	0.533013	-0.0533808	hypomethylation	0.0122523	0.0198266
cg11423701	0.829361	0.75497	-0.0743901	hypomethylation	0.00667637	0.0145865
cg11433866	0.18326	0.124334	-0.0589257	hypomethylation	0.000989231	0.00752456
cg11436027	0.932041	0.871448	-0.0605934	hypomethylation	0.0200137	0.0268394
cg11444332	0.42555	0.375047	-0.0505028	hypomethylation	0.0309513	0.035399
cg11452700	0.82456	0.76176	-0.0627998	hypomethylation	0.00103598	0.00752599
cg11456659	0.904895	0.85477	-0.0501254	hypomethylation	0.000376096	0.00596786
cg11462582	0.355624	0.290706	-0.0649179	hypomethylation	0.000152271	0.00403499
cg11474778	0.101366	0.151823	0.0504566	hypermethylation	0.000326865	0.00541786
cg11488033	0.689774	0.612388	-0.077386	hypomethylation	0.0404587	0.0431617
cg11517269	0.43175	0.375245	-0.0565046	hypomethylation	0.0450804	0.0468494
cg11524343	0.399542	0.346152	-0.0533891	hypomethylation	0.0409378	0.0435438
cg11532431	0.745119	0.798615	0.0534963	hypermethylation	0.0381434	0.0413384
cg11540482	0.333788	0.273284	-0.0605038	hypomethylation	0.0236146	0.0295827
cg11545307	0.899903	0.841979	-0.0579247	hypomethylation	0.020139	0.0268939
cg11564488	0.793156	0.74194	-0.0512155	hypomethylation	0.0111237	0.0190272
cg11581285	0.806984	0.876419	0.0694349	hypermethylation	0.0140062	0.0213977
cg11591267	0.642527	0.589783	-0.0527438	hypomethylation	0.00916062	0.0173395
cg11634827	0.324404	0.39481	0.070406	hypermethylation	0.0098126	0.0177726
cg11635197	0.64524	0.696331	0.0510905	hypermethylation	0.0131079	0.020619
cg11663585	0.923215	0.869394	-0.0538211	hypomethylation	0.00414013	0.0119153
cg11681913	0.742982	0.684239	-0.0587429	hypomethylation	0.021065	0.0275883
cg11682605	0.761816	0.700217	-0.0615985	hypomethylation	0.0109625	0.0188538
cg11721177	0.424944	0.486805	0.061861	hypermethylation	0.00137433	0.00825582
cg11740865	0.924978	0.87212	-0.0528582	hypomethylation	0.00207288	0.00952316
cg11741455	0.907921	0.853785	-0.054136	hypomethylation	0.00336335	0.0111655
cg11749010	0.227963	0.281562	0.0535994	hypermethylation	0.00974175	0.0177129
cg11755269	0.912473	0.861498	-0.050975	hypomethylation	0.00551136	0.013409
cg11775292	0.502825	0.446301	-0.0565243	hypomethylation	0.0349599	0.0387538
cg11793897	0.726476	0.802188	0.0757123	hypermethylation	0.00963766	0.0176965
cg11813512	0.841533	0.781134	-0.0603991	hypomethylation	0.00333122	0.0111026
cg11821532	0.782803	0.845057	0.0622537	hypermethylation	0.0443201	0.0462639
cg11839415	0.652644	0.708293	0.0556491	hypermethylation	0.0172056	0.0244012
cg11847078	0.617959	0.669148	0.0511894	hypermethylation	0.0308292	0.0353073
cg11852086	0.625716	0.567157	-0.0585594	hypomethylation	0.0206306	0.0272622
cg11854043	0.861464	0.807764	-0.0536993	hypomethylation	0.00439296	0.0121555
cg11856021	0.731127	0.669007	-0.0621205	hypomethylation	0.0322864	0.0365449
cg11868947	0.842594	0.893331	0.0507369	hypermethylation	0.00297909	0.0106808
cg11882601	0.916802	0.851708	-0.0650942	hypomethylation	0.00454112	0.0123197
cg11891336	0.411564	0.355088	-0.0564752	hypomethylation	0.00115471	0.00783153
cg11902941	0.797786	0.855191	0.057405	hypermethylation	0.00528031	0.0131643
cg11906002	0.767558	0.716358	-0.0511997	hypomethylation	0.0201425	0.0268939
cg11907224	0.679744	0.615088	-0.0646559	hypomethylation	0.0104476	0.0184073
cg11913416	0.312224	0.239173	-0.0730502	hypomethylation	0.0028703	0.0105814
cg11927345	0.527017	0.475806	-0.0512104	hypomethylation	0.0348228	0.0386417
cg11931211	0.596823	0.703917	0.107094	hypermethylation	0.0150743	0.0224543
cg11937920	0.819517	0.762497	-0.0570201	hypomethylation	0.00662829	0.0145419
cg11957516	0.807268	0.753805	-0.0534628	hypomethylation	0.0324376	0.0366667
cg11972810	0.484417	0.540671	0.0562547	hypermethylation	0.00189425	0.00929705
cg11978968	0.806214	0.739555	-0.0666586	hypomethylation	0.0205174	0.0271992
cg11998616	0.891657	0.827444	-0.0642136	hypomethylation	0.000491958	0.00627463
cg12018436	0.275938	0.206599	-0.0693387	hypomethylation	0.00278252	0.0104622
cg12034783	0.79849	0.745677	-0.0528133	hypomethylation	0.0155705	0.0228524
cg12043062	0.308274	0.248015	-0.060259	hypomethylation	0.000927217	0.00749388
cg12045875	0.780445	0.839061	0.0586165	hypermethylation	0.0445435	0.0464777
cg12050576	0.533307	0.457076	-0.0762315	hypomethylation	0.00855663	0.0166964
cg12060917	0.284618	0.218263	-0.066355	hypomethylation	0.00180921	0.00914889
cg12063490	0.440818	0.491469	0.0506509	hypermethylation	0.0239246	0.0297789
cg12064134	0.634336	0.689317	0.0549815	hypermethylation	0.0420124	0.0443133
cg12064373	0.228897	0.324735	0.0958387	hypermethylation	0.00155207	0.00873074
cg12096772	0.920901	0.867172	-0.0537295	hypomethylation	0.0421323	0.0443656
cg12099356	0.138929	0.0879679	-0.0509616	hypomethylation	0.0306372	0.0351821
cg12133118	0.422952	0.363509	-0.0594423	hypomethylation	0.00135927	0.0082168
cg12146864	0.33952	0.41726	0.0777402	hypermethylation	5.31913e-05	0.00318099
cg12156287	0.623632	0.546231	-0.0774003	hypomethylation	0.00477816	0.01253
cg12173150	0.274976	0.330624	0.0556477	hypermethylation	0.028911	0.033801
cg12193833	0.342415	0.416826	0.0744113	hypermethylation	0.012845	0.020408
cg12224203	0.313972	0.260222	-0.0537498	hypomethylation	0.0367791	0.0402576
cg12226028	0.290606	0.361855	0.0712489	hypermethylation	0.00228741	0.00980361
cg12232240	0.861543	0.805984	-0.0555589	hypomethylation	0.011668	0.0193802
cg12233386	0.916035	0.863065	-0.0529702	hypomethylation	0.0488822	0.0499457
cg12244665	0.815424	0.757632	-0.0577928	hypomethylation	0.00115362	0.00783153
cg12253142	0.834452	0.78441	-0.0500419	hypomethylation	0.0138771	0.021258
cg12261545	0.872293	0.820654	-0.0516382	hypomethylation	0.0144159	0.0217417
cg12278959	0.254314	0.202732	-0.0515814	hypomethylation	0.0276327	0.0326697
cg12289045	0.539862	0.481816	-0.0580457	hypomethylation	0.042622	0.0448251
cg12290615	0.463731	0.412168	-0.0515628	hypomethylation	0.0306501	0.0351821
cg12302982	0.481732	0.536335	0.0546026	hypermethylation	0.0423827	0.044592
cg12333160	0.254943	0.180311	-0.0746314	hypomethylation	0.0115055	0.0192138
cg12357534	0.701701	0.752609	0.050908	hypermethylation	0.0234788	0.0294859
cg12359832	0.741869	0.833208	0.0913396	hypermethylation	0.0344739	0.0383162
cg12372401	0.859836	0.788914	-0.0709223	hypomethylation	0.00903502	0.017204
cg12392374	0.921623	0.86725	-0.0543725	hypomethylation	0.0347736	0.0386152
cg12403591	0.558844	0.498672	-0.0601718	hypomethylation	0.0174993	0.0246103
cg12406108	0.552616	0.4675	-0.0851156	hypomethylation	0.020554	0.0272219
cg12407140	0.776715	0.827969	0.0512538	hypermethylation	0.0262189	0.0315904
cg12417772	0.562468	0.4976	-0.0648684	hypomethylation	5.27929e-05	0.00318099
cg12424249	0.882886	0.826049	-0.0568364	hypomethylation	0.00357172	0.0114567
cg12437115	0.86	0.791235	-0.0687646	hypomethylation	0.00337619	0.0111933
cg12437481	0.837081	0.757943	-0.0791377	hypomethylation	0.0481477	0.0493607
cg12442415	0.531011	0.59106	0.0600492	hypermethylation	0.0278541	0.0329007
cg12448452	0.863816	0.810622	-0.0531948	hypomethylation	0.00452644	0.0123195
cg12454169	0.181624	0.122752	-0.0588727	hypomethylation	0.0293774	0.0342036
cg12456927	0.744513	0.8265	0.081987	hypermethylation	0.0100582	0.017985
cg12470247	0.877472	0.824566	-0.0529066	hypomethylation	0.0118762	0.0195204
cg12481579	0.812658	0.866743	0.0540851	hypermethylation	0.0058457	0.0137453
cg12486510	0.813144	0.760446	-0.0526975	hypomethylation	0.00686286	0.0148768
cg12491193	0.822854	0.769095	-0.0537594	hypomethylation	0.00218053	0.00973628
cg12500951	0.595765	0.658114	0.0623488	hypermethylation	0.00141629	0.00842614
cg12508693	0.79532	0.717119	-0.0782019	hypomethylation	0.00150887	0.00860816
cg12523932	0.332065	0.404347	0.0722816	hypermethylation	0.000844266	0.00717199
cg12584458	0.47236	0.400292	-0.0720677	hypomethylation	0.0221015	0.0284866
cg12588126	0.62221	0.685307	0.0630969	hypermethylation	0.026064	0.0314585
cg12609785	0.135	0.0661469	-0.0688532	hypomethylation	0.011911	0.0195392
cg12610579	0.650128	0.5959	-0.0542275	hypomethylation	0.0319935	0.0363111
cg12623302	0.475929	0.408935	-0.0669944	hypomethylation	0.0208704	0.0274107
cg12628229	0.90348	0.842348	-0.0611323	hypomethylation	0.000173261	0.00425123
cg12650512	0.870428	0.819732	-0.0506959	hypomethylation	0.0160048	0.0232471
cg12681972	0.503767	0.559481	0.0557134	hypermethylation	0.0179056	0.0248765
cg12682298	0.853192	0.802506	-0.0506855	hypomethylation	0.0040724	0.0117964
cg12696295	0.664759	0.607294	-0.0574644	hypomethylation	0.0184958	0.0254167
cg12699274	0.285324	0.218395	-0.0669292	hypomethylation	0.000739298	0.0069089
cg12740337	0.412974	0.348801	-0.0641727	hypomethylation	0.0217691	0.0282237
cg12742889	0.852775	0.800147	-0.0526272	hypomethylation	0.0172851	0.0244418
cg12744031	0.33795	0.261449	-0.0765009	hypomethylation	0.0418711	0.0442197
cg12754571	0.453648	0.526862	0.0732138	hypermethylation	0.0253335	0.0309523
cg12758973	0.332208	0.397986	0.0657772	hypermethylation	0.033373	0.0373559
cg12765123	0.543816	0.48803	-0.0557861	hypomethylation	0.0434867	0.0456014
cg12777318	0.796919	0.744003	-0.0529161	hypomethylation	0.0114724	0.0191943
cg12782180	0.453192	0.508351	0.0551589	hypermethylation	0.00236732	0.00995302
cg12803068	0.822837	0.762031	-0.0608067	hypomethylation	0.046818	0.0483323
cg12810354	0.685898	0.635611	-0.0502871	hypomethylation	0.0246861	0.0304265
cg12811575	0.483354	0.395488	-0.0878666	hypomethylation	2.45243e-08	6.18748e-05
cg12830829	0.168314	0.115713	-0.052601	hypomethylation	1.87315e-05	0.00242755
cg12837996	0.909067	0.848506	-0.0605612	hypomethylation	0.00102146	0.00752456
cg12850242	0.368901	0.301781	-0.06712	hypomethylation	0.00414652	0.0119153
cg12870776	0.813414	0.762853	-0.0505604	hypomethylation	0.0172354	0.0244159
cg12871743	0.840831	0.752945	-0.0878858	hypomethylation	0.000262838	0.00502379
cg12884719	0.563908	0.501693	-0.0622157	hypomethylation	0.00444749	0.0122373
cg12892016	0.590398	0.539295	-0.0511029	hypomethylation	0.00962682	0.0176965
cg12894431	0.906928	0.856838	-0.0500897	hypomethylation	0.0148415	0.0222095
cg12919720	0.671704	0.752791	0.0810865	hypermethylation	0.000956429	0.00751735
cg12927641	0.873404	0.811615	-0.0617886	hypomethylation	0.0145892	0.0219098
cg12939989	0.881535	0.830995	-0.0505404	hypomethylation	0.000514638	0.00637693
cg12944343	0.533064	0.450151	-0.082913	hypomethylation	0.007412	0.015404
cg12957797	0.56839	0.493521	-0.0748688	hypomethylation	0.0119799	0.0195886
cg12958961	0.40605	0.341964	-0.0640859	hypomethylation	0.00529833	0.0131831
cg12977772	0.243036	0.187642	-0.0553939	hypomethylation	0.00452641	0.0123195
cg12978573	0.31705	0.249226	-0.0678247	hypomethylation	0.00132905	0.00820079
cg12990410	0.554672	0.498278	-0.0563939	hypomethylation	0.0189703	0.0259275
cg13011109	0.448302	0.395441	-0.0528612	hypomethylation	0.0368659	0.0403351
cg13019085	0.633165	0.581263	-0.0519019	hypomethylation	0.0274924	0.0325802
cg13020663	0.645633	0.581566	-0.0640668	hypomethylation	0.0121701	0.0197587
cg13023205	0.761356	0.608955	-0.152401	hypomethylation	0.0173309	0.0244551
cg13033202	0.177825	0.0772059	-0.100619	hypomethylation	0.0231461	0.0293014
cg13037952	0.880762	0.824296	-0.0564661	hypomethylation	0.0120399	0.0196328
cg13038178	0.346867	0.292034	-0.0548337	hypomethylation	0.00247057	0.00995302
cg13039343	0.607312	0.548724	-0.0585878	hypomethylation	0.000546717	0.00638695
cg13057506	0.606322	0.553267	-0.0530549	hypomethylation	0.0206146	0.0272622
cg13063481	0.422674	0.36871	-0.0539637	hypomethylation	0.00068017	0.00672842
cg13071082	0.5179	0.576454	0.0585539	hypermethylation	0.0331761	0.0372015
cg13072775	0.53864	0.487368	-0.051272	hypomethylation	0.0286423	0.0336114
cg13104385	0.481708	0.427663	-0.0540442	hypomethylation	0.0434539	0.045586
cg13113953	0.369726	0.308368	-0.0613587	hypomethylation	0.00297437	0.0106808
cg13121213	0.943199	0.882434	-0.060765	hypomethylation	0.0014692	0.00850183
cg13130352	0.562628	0.619807	0.057179	hypermethylation	0.000426983	0.00613812
cg13135812	0.59597	0.53945	-0.0565204	hypomethylation	0.00433031	0.0120589
cg13169954	0.942823	0.880772	-0.0620515	hypomethylation	0.000530999	0.00638695
cg13186710	0.219873	0.168126	-0.0517474	hypomethylation	0.000175279	0.00425123
cg13222389	0.48221	0.418447	-0.0637622	hypomethylation	0.00732633	0.0153143
cg13245522	0.585355	0.501057	-0.0842982	hypomethylation	0.000718807	0.00684358
cg13250654	0.693373	0.64177	-0.0516034	hypomethylation	0.00562241	0.0135356
cg13260280	0.673984	0.614007	-0.0599775	hypomethylation	0.000536474	0.00638695
cg13263846	0.241441	0.188463	-0.0529782	hypomethylation	0.012743	0.0203508
cg13280036	0.356304	0.301752	-0.054552	hypomethylation	0.00940416	0.0175589
cg13295463	0.437522	0.381231	-0.0562908	hypomethylation	0.014283	0.0216562
cg13311549	0.852568	0.80097	-0.0515976	hypomethylation	0.0464106	0.0479893
cg13373342	0.56171	0.504388	-0.0573219	hypomethylation	0.00127555	0.0081268
cg13373703	0.673909	0.723983	0.0500736	hypermethylation	0.0290262	0.0339199
cg13383246	0.275157	0.224665	-0.050492	hypomethylation	0.00764526	0.0156821
cg13417066	0.412568	0.328932	-0.0836354	hypomethylation	0.00478257	0.01253
cg13427594	0.905918	0.843985	-0.0619331	hypomethylation	0.000241608	0.00491595
cg13457900	0.444252	0.494965	0.0507129	hypermethylation	0.0137371	0.0211076
cg13483413	0.630694	0.577031	-0.0536627	hypomethylation	0.0460833	0.0476704
cg13485366	0.524165	0.468046	-0.0561193	hypomethylation	0.00194717	0.00933974
cg13486584	0.8691	0.923395	0.0542952	hypermethylation	0.0262772	0.0316302
cg13505245	0.62003	0.567153	-0.0528769	hypomethylation	0.00332556	0.0110984
cg13511418	0.915289	0.864432	-0.0508574	hypomethylation	0.00708761	0.0150807
cg13525026	0.402086	0.46308	0.0609945	hypermethylation	6.87309e-05	0.0032687
cg13550855	0.566763	0.511706	-0.0550569	hypomethylation	0.0057042	0.0136027
cg13552155	0.83155	0.780556	-0.0509946	hypomethylation	0.014374	0.0217417
cg13561855	0.312652	0.259972	-0.0526796	hypomethylation	0.0210065	0.0275465
cg13569051	0.676727	0.614888	-0.0618386	hypomethylation	0.0369053	0.0403432
cg13616132	0.260171	0.204612	-0.055559	hypomethylation	0.00704312	0.0150464
cg13629798	0.812568	0.75927	-0.0532975	hypomethylation	0.0192253	0.0261344
cg13641043	0.424551	0.486525	0.0619735	hypermethylation	0.00175658	0.00909497
cg13659778	0.757986	0.703062	-0.054924	hypomethylation	0.0110602	0.0189668
cg13665998	0.046684	0.10612	0.0594357	hypermethylation	0.00876301	0.0169288
cg13683361	0.282508	0.223596	-0.0589123	hypomethylation	0.00435996	0.0121177
cg13691961	0.594077	0.644553	0.0504764	hypermethylation	0.00554128	0.0134429
cg13700815	0.339082	0.286196	-0.0528858	hypomethylation	0.000410233	0.00613812
cg13702536	0.870774	0.928738	0.0579635	hypermethylation	0.0120073	0.019608
cg13707224	0.497062	0.43946	-0.057602	hypomethylation	0.0017743	0.00911249
cg13713663	0.392365	0.339559	-0.0528067	hypomethylation	0.000830623	0.00708093
cg13716414	0.70202	0.646735	-0.055285	hypomethylation	0.00354958	0.0114229
cg13732582	0.257664	0.315171	0.0575073	hypermethylation	0.0166184	0.0238499
cg13742426	0.748402	0.696054	-0.0523485	hypomethylation	0.00593407	0.0138243
cg13743251	0.619841	0.56816	-0.051681	hypomethylation	0.0105701	0.0184854
cg13759594	0.567803	0.515939	-0.0518639	hypomethylation	0.0375408	0.0408785
cg13760650	0.38812	0.330848	-0.0572715	hypomethylation	0.00301141	0.0107162
cg13800700	0.448644	0.391271	-0.0573724	hypomethylation	0.00612165	0.0140408
cg13818014	0.486237	0.546787	0.0605494	hypermethylation	0.00411697	0.0118811
cg13838055	0.274091	0.220405	-0.0536863	hypomethylation	0.01672	0.0239413
cg13838534	0.572438	0.513586	-0.0588519	hypomethylation	0.0175701	0.0246686
cg13839793	0.484796	0.419377	-0.065419	hypomethylation	0.000563335	0.00649513
cg13841158	0.934066	0.878138	-0.0559279	hypomethylation	0.0081705	0.0163087
cg13856212	0.324386	0.267728	-0.0566586	hypomethylation	0.000128791	0.00382281
cg13865463	0.486028	0.422006	-0.0640213	hypomethylation	0.0104225	0.0184064
cg13870080	0.585043	0.518822	-0.0662209	hypomethylation	0.00252328	0.00995302
cg13871843	0.820277	0.870808	0.050531	hypermethylation	0.0123822	0.0199619
cg13880113	0.373079	0.322806	-0.0502736	hypomethylation	0.00988201	0.0178054
cg13900758	0.695218	0.756594	0.0613767	hypermethylation	0.0243574	0.0301321
cg13902645	0.818116	0.871426	0.0533104	hypermethylation	0.0406748	0.0433556
cg13916874	0.742777	0.680154	-0.0626233	hypomethylation	0.00258963	0.0100984
cg13920856	0.776037	0.62814	-0.147898	hypomethylation	0.0351193	0.0388622
cg13927605	0.407673	0.348469	-0.0592036	hypomethylation	0.00282328	0.0104906
cg13947469	0.241197	0.160119	-0.0810778	hypomethylation	0.00491334	0.0126925
cg13953630	0.845603	0.770973	-0.0746301	hypomethylation	4.34598e-05	0.00296349
cg13973086	0.550921	0.605238	0.0543172	hypermethylation	0.00277634	0.0104548
cg14015327	0.709317	0.638095	-0.0712222	hypomethylation	0.00235045	0.00995302
cg14020598	0.681301	0.629167	-0.0521341	hypomethylation	0.00917315	0.0173395
cg14021698	0.785151	0.734169	-0.0509815	hypomethylation	0.0115258	0.0192325
cg14024893	0.705332	0.774712	0.0693799	hypermethylation	0.0203825	0.02708
cg14033585	0.91453	0.863668	-0.0508617	hypomethylation	0.000507992	0.00634487
cg14089881	0.347417	0.472334	0.124917	hypermethylation	1.57153e-05	0.00242755
cg14118991	0.776446	0.722206	-0.0542396	hypomethylation	0.0392032	0.0421251
cg14120340	0.901942	0.847832	-0.0541108	hypomethylation	0.0052971	0.0131831
cg14122980	0.565568	0.5116	-0.0539683	hypomethylation	0.0286335	0.0336114
cg14126466	0.456664	0.384827	-0.0718365	hypomethylation	0.0016748	0.00893343
cg14167761	0.866491	0.811698	-0.0547924	hypomethylation	0.00417738	0.0119675
cg14176930	0.325768	0.271609	-0.054159	hypomethylation	0.0275872	0.0326466
cg14185918	0.239009	0.289957	0.0509479	hypermethylation	0.0259804	0.0314127
cg14206236	0.517673	0.464871	-0.0528028	hypomethylation	0.000530448	0.00638695
cg14239655	0.326112	0.271293	-0.054819	hypomethylation	0.0213233	0.0278316
cg14270725	0.292369	0.235754	-0.0566147	hypomethylation	0.0044617	0.0122624
cg14273320	0.702363	0.642579	-0.0597839	hypomethylation	0.0218655	0.0282773
cg14280181	0.438944	0.375191	-0.0637529	hypomethylation	0.0231239	0.0292999
cg14283783	0.294881	0.239854	-0.0550261	hypomethylation	0.000870975	0.00725238
cg14287724	0.588581	0.640928	0.0523473	hypermethylation	0.0166759	0.0238917
cg14288292	0.731656	0.672679	-0.0589774	hypomethylation	0.00216725	0.00971221
cg14306058	0.857418	0.908802	0.0513839	hypermethylation	0.00704168	0.0150464
cg14313315	0.359822	0.306217	-0.0536044	hypomethylation	0.00204375	0.00947866
cg14314056	0.446674	0.385485	-0.0611882	hypomethylation	0.00225483	0.00977469
cg14317384	0.531091	0.626259	0.095168	hypermethylation	0.025139	0.0308191
cg14330126	0.196542	0.145045	-0.0514968	hypomethylation	0.0168597	0.0241003
cg14337614	0.405901	0.35411	-0.051791	hypomethylation	0.00431891	0.0120521
cg14344550	0.226044	0.175479	-0.0505652	hypomethylation	0.0295286	0.0343163
cg14353218	0.657698	0.708222	0.0505235	hypermethylation	0.0013329	0.00820079
cg14366095	0.634103	0.497044	-0.137059	hypomethylation	0.00753098	0.0155616
cg14366292	0.740806	0.673801	-0.0670048	hypomethylation	0.00214478	0.00969762
cg14372705	0.526939	0.462734	-0.0642051	hypomethylation	0.0486445	0.0497829
cg14384748	0.337407	0.268316	-0.0690917	hypomethylation	0.00667754	0.0145865
cg14386607	0.592698	0.539308	-0.0533904	hypomethylation	0.0292188	0.0340504
cg14417760	0.382126	0.323511	-0.0586152	hypomethylation	0.00338797	0.011203
cg14424631	0.330688	0.27163	-0.0590586	hypomethylation	0.00893245	0.0170861
cg14446979	0.434455	0.48777	0.0533154	hypermethylation	0.0023603	0.00995302
cg14458563	0.542905	0.459509	-0.0833953	hypomethylation	0.0127525	0.0203508
cg14469826	0.638042	0.691301	0.0532588	hypermethylation	0.0243637	0.0301321
cg14479198	0.720152	0.659371	-0.0607811	hypomethylation	0.00173193	0.0090469
cg14498475	0.47621	0.537179	0.0609684	hypermethylation	0.012933	0.0204779
cg14501839	0.867624	0.816584	-0.0510401	hypomethylation	0.04772	0.0490218
cg14502625	0.682463	0.618186	-0.064277	hypomethylation	0.000737865	0.0069089
cg14503395	0.692929	0.764742	0.0718139	hypermethylation	0.0233077	0.0294434
cg14520079	0.614494	0.541685	-0.0728084	hypomethylation	7.53698e-05	0.0033361
cg14538238	0.132538	0.195022	0.0624844	hypermethylation	0.00253456	0.00996058
cg14540736	0.836738	0.775772	-0.0609663	hypomethylation	0.00768722	0.0157486
cg14556503	0.766538	0.828974	0.0624362	hypermethylation	0.0305121	0.0350875
cg14585907	0.872151	0.821806	-0.050345	hypomethylation	0.0218657	0.0282773
cg14596589	0.608322	0.547171	-0.0611505	hypomethylation	0.0389207	0.0420018
cg14621254	0.645163	0.713768	0.0686049	hypermethylation	0.000367383	0.00590388
cg14628347	0.684435	0.599759	-0.0846758	hypomethylation	0.0326825	0.036828
cg14646055	0.354351	0.414732	0.0603814	hypermethylation	0.00769234	0.0157486
cg14654239	0.684748	0.62662	-0.0581279	hypomethylation	0.0169319	0.0241624
cg14668119	0.827372	0.773756	-0.0536164	hypomethylation	0.00177731	0.00911249
cg14672354	0.703673	0.653333	-0.0503407	hypomethylation	0.0137337	0.0211076
cg14677912	0.107805	0.053799	-0.0540059	hypomethylation	0.0141964	0.0215638
cg14687930	0.862126	0.800352	-0.0617738	hypomethylation	0.00145301	0.00848599
cg14695566	0.447814	0.363726	-0.0840889	hypomethylation	0.00258733	0.0100984
cg14714346	0.378048	0.314243	-0.0638047	hypomethylation	0.00470305	0.0124671
cg14732654	0.676214	0.617941	-0.0582739	hypomethylation	0.0270359	0.0321506
cg14741581	0.739873	0.648561	-0.0913128	hypomethylation	5.93787e-05	0.00318099
cg14742940	0.512388	0.441341	-0.0710473	hypomethylation	0.00511216	0.0129628
cg14752361	0.851109	0.792312	-0.0587976	hypomethylation	0.000557995	0.00648766
cg14758072	0.501108	0.435318	-0.0657904	hypomethylation	0.00426277	0.0120067
cg14773235	0.712051	0.660002	-0.0520489	hypomethylation	0.0368902	0.0403432
cg14776578	0.377751	0.32752	-0.0502312	hypomethylation	0.0010084	0.00752456
cg14781605	0.284261	0.340157	0.0558967	hypermethylation	0.0220022	0.0284092
cg14784779	0.794134	0.742875	-0.0512593	hypomethylation	0.00775233	0.015799
cg14798641	0.66223	0.607898	-0.0543324	hypomethylation	0.00566831	0.0135798
cg14817448	0.58144	0.515414	-0.0660259	hypomethylation	0.000108557	0.00360382
cg14827090	0.705431	0.787083	0.0816522	hypermethylation	0.0131121	0.020619
cg14829325	0.827505	0.775138	-0.0523672	hypomethylation	0.00651612	0.0144086
cg14836960	0.26335	0.210338	-0.0530119	hypomethylation	0.00638605	0.0142709
cg14846442	0.580105	0.520991	-0.0591138	hypomethylation	0.00111081	0.00775568
cg14868764	0.327751	0.420514	0.0927637	hypermethylation	0.0119424	0.0195781
cg14871138	0.697131	0.644006	-0.0531246	hypomethylation	0.00982729	0.0177777
cg14891093	0.767567	0.702027	-0.0655394	hypomethylation	0.00331465	0.0110766
cg14909532	0.929663	0.869621	-0.0600417	hypomethylation	0.0246446	0.0303949
cg14940668	0.58585	0.517616	-0.0682342	hypomethylation	0.00951057	0.0176312
cg14947218	0.643016	0.699316	0.0562996	hypermethylation	0.0132332	0.0207375
cg14950384	0.87051	0.81922	-0.0512903	hypomethylation	0.0017806	0.00911249
cg14960550	0.501919	0.442638	-0.0592805	hypomethylation	0.00552778	0.0134304
cg14963928	0.362707	0.311665	-0.0510414	hypomethylation	0.00970169	0.0177129
cg14968926	0.791352	0.730431	-0.060921	hypomethylation	0.00129193	0.00814217
cg14972139	0.689691	0.739904	0.0502124	hypermethylation	0.0168095	0.0240421
cg15020926	0.474433	0.529939	0.0555053	hypermethylation	0.0342169	0.0381312
cg15021280	0.42118	0.361972	-0.059208	hypomethylation	0.0250392	0.0307331
cg15033108	0.882731	0.941645	0.0589147	hypermethylation	0.0140769	0.0214469
cg15054400	0.738091	0.687027	-0.0510641	hypomethylation	0.033351	0.0373539
cg15078822	0.732433	0.793689	0.0612563	hypermethylation	0.025783	0.0313044
cg15088998	0.823129	0.771319	-0.0518101	hypomethylation	0.0136014	0.0210077
cg15097551	0.830826	0.74932	-0.081506	hypomethylation	0.000469808	0.00623855
cg15101447	0.655924	0.60373	-0.0521941	hypomethylation	0.0149758	0.0223573
cg15131665	0.342435	0.284257	-0.0581776	hypomethylation	0.0100419	0.0179783
cg15145296	0.0930801	0.210582	0.117502	hypermethylation	0.0231833	0.0293337
cg15149117	0.603576	0.537591	-0.0659855	hypomethylation	0.000220305	0.00471042
cg15152622	0.78866	0.717087	-0.0715734	hypomethylation	0.00465434	0.0124132
cg15152824	0.897888	0.842111	-0.0557775	hypomethylation	0.00228737	0.00980361
cg15175143	0.25928	0.205033	-0.054247	hypomethylation	0.0231322	0.0292999
cg15192909	0.670517	0.617152	-0.0533647	hypomethylation	0.0017064	0.00899441
cg15194488	0.519153	0.46831	-0.0508428	hypomethylation	0.00898209	0.0171421
cg15195758	0.839518	0.786936	-0.0525822	hypomethylation	0.0302194	0.0349101
cg15201545	0.171464	0.0951707	-0.0762933	hypomethylation	0.0394087	0.0423098
cg15205435	0.183259	0.233268	0.0500094	hypermethylation	0.0298227	0.0345784
cg15205559	0.712657	0.788516	0.0758591	hypermethylation	0.00274603	0.0104042
cg15231205	0.752696	0.812935	0.0602388	hypermethylation	0.0118386	0.0195194
cg15231491	0.888876	0.833153	-0.0557233	hypomethylation	0.00317748	0.010812
cg15234400	0.194831	0.144016	-0.0508149	hypomethylation	0.000255326	0.00500174
cg15235707	0.449813	0.370685	-0.0791287	hypomethylation	0.000136819	0.00390076
cg15245051	0.279882	0.229192	-0.0506897	hypomethylation	0.0316653	0.0360034
cg15258617	0.721695	0.781724	0.0600288	hypermethylation	0.00249252	0.00995302
cg15266400	0.862598	0.812476	-0.0501215	hypomethylation	0.00395482	0.0116665
cg15282634	0.366466	0.316451	-0.0500155	hypomethylation	0.00124328	0.00805495
cg15284256	0.671444	0.606755	-0.064689	hypomethylation	0.0327708	0.0369111
cg15293422	0.662718	0.611533	-0.0511848	hypomethylation	0.0150534	0.0224543
cg15327725	0.18142	0.120974	-0.0604467	hypomethylation	0.000936259	0.00749388
cg15331007	0.685386	0.622631	-0.0627552	hypomethylation	0.0047573	0.012493
cg15339218	0.894742	0.832364	-0.0623783	hypomethylation	0.00329233	0.0110373
cg15348733	0.701589	0.630129	-0.0714602	hypomethylation	0.00177767	0.00911249
cg15355800	0.613633	0.549602	-0.0640306	hypomethylation	0.0208323	0.0273899
cg15382620	0.689246	0.740357	0.0511108	hypermethylation	0.0329131	0.0370218
cg15405964	0.77623	0.841111	0.0648812	hypermethylation	0.00072815	0.00690647
cg15411594	0.451309	0.398766	-0.0525437	hypomethylation	0.0383204	0.0415124
cg15412476	0.489879	0.436595	-0.0532838	hypomethylation	0.0165738	0.0237995
cg15419294	0.610149	0.679184	0.0690352	hypermethylation	0.0265059	0.0318152
cg15426287	0.650349	0.710861	0.0605112	hypermethylation	0.0215097	0.0279881
cg15446806	0.896527	0.840297	-0.0562301	hypomethylation	0.000966782	0.00752456
cg15465743	0.818701	0.675325	-0.143376	hypomethylation	0.00851516	0.016659
cg15469871	0.329314	0.39689	0.0675763	hypermethylation	0.0118568	0.0195194
cg15476885	0.641141	0.565417	-0.0757234	hypomethylation	1.77378e-05	0.00242755
cg15488736	0.900162	0.842232	-0.0579297	hypomethylation	0.00625861	0.0141826
cg15507901	0.259226	0.20866	-0.050566	hypomethylation	0.0157793	0.0230523
cg15533921	0.783619	0.732432	-0.0511862	hypomethylation	0.0032985	0.0110373
cg15535683	0.707379	0.655181	-0.0521983	hypomethylation	0.0106272	0.0185213
cg15541326	0.40167	0.342472	-0.0591978	hypomethylation	0.00021619	0.00471042
cg15556873	0.672441	0.621201	-0.0512392	hypomethylation	0.0221537	0.0285152
cg15557094	0.791426	0.716565	-0.0748617	hypomethylation	0.0029295	0.0106042
cg15561613	0.287055	0.342795	0.0557402	hypermethylation	0.020158	0.0268952
cg15575538	0.378446	0.327681	-0.050765	hypomethylation	0.00927345	0.0174162
cg15597364	0.446583	0.500495	0.0539121	hypermethylation	0.00793707	0.0159763
cg15603964	0.607118	0.546041	-0.0610771	hypomethylation	0.0176906	0.0247078
cg15609186	0.275655	0.219876	-0.0557794	hypomethylation	0.00428668	0.0120329
cg15624813	0.423105	0.370253	-0.0528526	hypomethylation	0.0105708	0.0184854
cg15627300	0.900807	0.846042	-0.0547653	hypomethylation	0.0130484	0.0205809
cg15655351	0.308083	0.255419	-0.0526638	hypomethylation	0.00279473	0.0104662
cg15658543	0.803541	0.743978	-0.0595622	hypomethylation	0.00773152	0.0157693
cg15687395	0.774906	0.695509	-0.0793968	hypomethylation	0.0085344	0.0166788
cg15695045	0.531133	0.416261	-0.114872	hypomethylation	1.47964e-05	0.00242755
cg15703970	0.796432	0.855048	0.0586155	hypermethylation	0.0374636	0.0408121
cg15716642	0.259277	0.194575	-0.0647023	hypomethylation	0.000262563	0.00502379
cg15725086	0.756268	0.807393	0.0511251	hypermethylation	0.010711	0.0185986
cg15732976	0.848325	0.777914	-0.0704109	hypomethylation	0.038922	0.0420018
cg15760176	0.810242	0.760086	-0.0501557	hypomethylation	0.00461323	0.0123427
cg15794017	0.624774	0.685901	0.061127	hypermethylation	0.00392405	0.0116665
cg15800513	0.446294	0.392945	-0.0533485	hypomethylation	0.0038952	0.0116665
cg15804774	0.952035	0.896535	-0.0554994	hypomethylation	0.00121912	0.0080535
cg15830864	0.610542	0.550405	-0.0601369	hypomethylation	0.0342408	0.0381411
cg15894129	0.606508	0.553978	-0.0525292	hypomethylation	0.00521492	0.0130788
cg15910301	0.446154	0.369438	-0.0767163	hypomethylation	0.00473068	0.0124671
cg15911493	0.567725	0.510874	-0.056851	hypomethylation	0.00298957	0.0106808
cg15920791	0.545632	0.615315	0.0696833	hypermethylation	0.00366885	0.0114567
cg15922174	0.160304	0.226998	0.0666943	hypermethylation	0.00827111	0.0164057
cg15936068	0.795127	0.856412	0.0612858	hypermethylation	0.0274122	0.0325158
cg15940569	0.32414	0.248441	-0.075699	hypomethylation	0.000990842	0.00752456
cg15948377	0.530988	0.466636	-0.0643523	hypomethylation	0.0151472	0.0225192
cg15949433	0.795426	0.743057	-0.0523683	hypomethylation	0.019087	0.0260165
cg15973470	0.547466	0.496429	-0.0510367	hypomethylation	0.0129662	0.0204968
cg15975554	0.795057	0.728133	-0.0669241	hypomethylation	0.00224819	0.00977469
cg16006004	0.599121	0.649337	0.0502164	hypermethylation	0.0455979	0.0473156
cg16009407	0.357433	0.306549	-0.0508845	hypomethylation	0.0027118	0.0103819
cg16030471	0.620443	0.569331	-0.0511116	hypomethylation	0.0418281	0.0442192
cg16051228	0.553359	0.606752	0.053393	hypermethylation	4.65656e-05	0.00309171
cg16053012	0.725176	0.780556	0.0553796	hypermethylation	0.0058034	0.0137292
cg16054606	0.564796	0.508919	-0.0558763	hypomethylation	0.0439022	0.0459035
cg16054651	0.481239	0.42349	-0.0577481	hypomethylation	0.0121088	0.019708
cg16074739	0.424064	0.36347	-0.0605939	hypomethylation	0.000698138	0.00674867
cg16075940	0.6673	0.595954	-0.0713458	hypomethylation	0.0104994	0.0184552
cg16115627	0.467069	0.524266	0.0571967	hypermethylation	0.035425	0.039084
cg16121206	0.546179	0.483524	-0.0626545	hypomethylation	0.0107893	0.0186832
cg16125291	0.318076	0.259294	-0.058782	hypomethylation	0.0022347	0.00977469
cg16131766	0.854049	0.906569	0.0525199	hypermethylation	0.000227208	0.00473756
cg16146322	0.226278	0.175085	-0.0511923	hypomethylation	0.00480864	0.0125722
cg16170495	0.446704	0.498886	0.0521822	hypermethylation	0.0366049	0.0400843
cg16170874	0.589554	0.645361	0.0558068	hypermethylation	0.00251029	0.00995302
cg16174298	0.312124	0.255561	-0.0565636	hypomethylation	0.0140673	0.0214452
cg16188354	0.89569	0.837677	-0.058013	hypomethylation	0.00950872	0.0176312
cg16188466	0.820675	0.871249	0.0505744	hypermethylation	0.0288839	0.033785
cg16195970	0.40075	0.340571	-0.0601797	hypomethylation	0.00288145	0.0105814
cg16219773	0.854771	0.800002	-0.0547682	hypomethylation	0.000412739	0.00613812
cg16224924	0.394886	0.343382	-0.0515047	hypomethylation	0.0223011	0.0286339
cg16232234	0.804867	0.74882	-0.0560468	hypomethylation	0.00408921	0.011818
cg16234328	0.80111	0.851398	0.0502886	hypermethylation	0.0351874	0.0389205
cg16238336	0.671191	0.592208	-0.0789831	hypomethylation	0.01371	0.0210917
cg16267913	0.733574	0.677223	-0.0563503	hypomethylation	0.00251138	0.00995302
cg16267920	0.726889	0.674875	-0.052013	hypomethylation	0.0269262	0.0320598
cg16273546	0.544573	0.450615	-0.0939585	hypomethylation	0.0237065	0.0296096
cg16276982	0.336563	0.387179	0.0506154	hypermethylation	0.0307475	0.0352618
cg16288318	0.58756	0.650744	0.0631847	hypermethylation	0.0140112	0.0213977
cg16292264	0.874088	0.817091	-0.0569963	hypomethylation	0.00721844	0.0152148
cg16316394	0.62911	0.575135	-0.053975	hypomethylation	0.033533	0.0375183
cg16332047	0.299363	0.24649	-0.0528731	hypomethylation	0.0227692	0.0290576
cg16339541	0.659204	0.608455	-0.0507496	hypomethylation	0.0269259	0.0320598
cg16368504	0.734694	0.67118	-0.0635136	hypomethylation	0.00160897	0.0087686
cg16399567	0.835017	0.781534	-0.0534826	hypomethylation	0.0302973	0.0349521
cg16434510	0.842862	0.789456	-0.0534061	hypomethylation	0.00247067	0.00995302
cg16443366	0.77592	0.705119	-0.0708007	hypomethylation	0.0164884	0.0237173
cg16460495	0.373576	0.308207	-0.0653683	hypomethylation	0.00226193	0.00977469
cg16495782	0.681049	0.613797	-0.0672518	hypomethylation	0.00118488	0.00792126
cg16512163	0.703432	0.782782	0.0793492	hypermethylation	0.0133351	0.0208436
cg16530595	0.913051	0.860528	-0.0525224	hypomethylation	0.0243389	0.0301321
cg16558770	0.459936	0.404837	-0.0550987	hypomethylation	0.0354622	0.0391046
cg16561657	0.160712	0.110607	-0.0501042	hypomethylation	0.00884779	0.0170077
cg16566943	0.675897	0.614452	-0.0614454	hypomethylation	0.00686937	0.0148768
cg16574737	0.507596	0.416125	-0.0914711	hypomethylation	0.00111513	0.00775568
cg16592832	0.495495	0.548015	0.0525197	hypermethylation	0.000657942	0.00665674
cg16631283	0.737986	0.685173	-0.0528131	hypomethylation	0.0036161	0.0114567
cg16636104	0.811954	0.754329	-0.0576248	hypomethylation	0.0364562	0.0399562
cg16643902	0.275126	0.222736	-0.0523901	hypomethylation	0.00157628	0.00873074
cg16651126	0.365591	0.423085	0.0574935	hypermethylation	0.00542826	0.01336
cg16653991	0.493924	0.343739	-0.150185	hypomethylation	0.00392814	0.0116665
cg16680214	0.408482	0.350541	-0.0579412	hypomethylation	0.0378901	0.0411345
cg16698814	0.324225	0.272503	-0.0517213	hypomethylation	0.00640793	0.0142946
cg16703220	0.88363	0.935384	0.0517535	hypermethylation	0.0210712	0.0275883
cg16703660	0.533337	0.436412	-0.0969248	hypomethylation	0.00382632	0.0116064
cg16734331	0.755739	0.704397	-0.0513412	hypomethylation	0.000462164	0.00623855
cg16739686	0.467925	0.524336	0.0564116	hypermethylation	0.00790716	0.0159449
cg16776097	0.237831	0.178824	-0.0590075	hypomethylation	0.000113184	0.00367435
cg16781992	0.187454	0.134589	-0.0528651	hypomethylation	0.00590251	0.0138117
cg16815829	0.829429	0.772876	-0.0565531	hypomethylation	0.0201347	0.0268939
cg16823252	0.406447	0.493166	0.0867192	hypermethylation	0.0086228	0.0167607
cg16842214	0.521066	0.469913	-0.0511529	hypomethylation	0.00549801	0.0133894
cg16849481	0.459355	0.406037	-0.0533179	hypomethylation	0.0117833	0.0194946
cg16852440	0.427808	0.376909	-0.050899	hypomethylation	0.00124418	0.00805495
cg16882684	0.673788	0.621894	-0.0518937	hypomethylation	0.00584391	0.0137453
cg16914149	0.615372	0.671232	0.05586	hypermethylation	0.00349396	0.0113825
cg16931969	0.514692	0.455477	-0.0592151	hypomethylation	0.0270812	0.0321533
cg16932560	0.653157	0.599212	-0.0539449	hypomethylation	0.0141301	0.0215091
cg16944350	0.664356	0.612673	-0.0516823	hypomethylation	0.0241999	0.0300623
cg16951942	0.211386	0.286807	0.0754211	hypermethylation	0.00578749	0.0137292
cg16955800	0.3238	0.489734	0.165934	hypermethylation	0.0102937	0.0182826
cg16987982	0.536407	0.586446	0.0500399	hypermethylation	0.0164556	0.0236836
cg16990009	0.916264	0.977197	0.0609331	hypermethylation	0.0102486	0.0182608
cg16997101	0.654459	0.731527	0.0770681	hypermethylation	0.00942322	0.0175589
cg17006655	0.797077	0.740509	-0.0565682	hypomethylation	0.00454192	0.0123197
cg17006797	0.431361	0.375456	-0.0559057	hypomethylation	0.00908407	0.0172714
cg17011953	0.817194	0.748038	-0.0691567	hypomethylation	0.00158477	0.00873074
cg17019513	0.634098	0.582429	-0.0516694	hypomethylation	0.00815037	0.0162814
cg17022362	0.677352	0.784823	0.10747	hypermethylation	6.23881e-05	0.00318099
cg17032646	0.432325	0.372976	-0.0593488	hypomethylation	0.000853855	0.00717461
cg17035276	0.725257	0.81818	0.092923	hypermethylation	0.0350117	0.0387691
cg17035304	0.667369	0.612403	-0.0549653	hypomethylation	0.00252474	0.00995302
cg17036014	0.574084	0.5184	-0.0556844	hypomethylation	0.0302614	0.0349425
cg17056731	0.252636	0.188743	-0.0638929	hypomethylation	0.000690268	0.00672842
cg17063544	0.834766	0.88497	0.0502042	hypermethylation	0.00449954	0.0123127
cg17074339	0.259269	0.18944	-0.0698285	hypomethylation	0.00564037	0.0135659
cg17077566	0.878435	0.827358	-0.0510765	hypomethylation	0.0153171	0.0226524
cg17079172	0.882091	0.827249	-0.0548428	hypomethylation	3.37779e-05	0.00264759
cg17082225	0.71348	0.65664	-0.0568404	hypomethylation	0.00718064	0.0151605
cg17082340	0.613511	0.562448	-0.0510629	hypomethylation	0.00963754	0.0176965
cg17091812	0.317043	0.265208	-0.0518348	hypomethylation	0.0176807	0.0247078
cg17107388	0.536035	0.636993	0.100958	hypermethylation	0.0105725	0.0184854
cg17111845	0.690176	0.621502	-0.0686731	hypomethylation	0.00772156	0.0157693
cg17127646	0.735875	0.673293	-0.0625819	hypomethylation	0.0107755	0.0186721
cg17131445	0.754493	0.694595	-0.0598973	hypomethylation	0.00103093	0.00752456
cg17134153	0.283453	0.229654	-0.0537988	hypomethylation	0.00237903	0.00995302
cg17143303	0.483548	0.428486	-0.0550623	hypomethylation	0.000103237	0.00347289
cg17148913	0.767751	0.714052	-0.0536985	hypomethylation	0.0034831	0.0113825
cg17164117	0.857796	0.788275	-0.0695207	hypomethylation	0.00299461	0.0106808
cg17179862	0.503429	0.558195	0.0547658	hypermethylation	0.013379	0.0208436
cg17181046	0.592728	0.537011	-0.055717	hypomethylation	0.00382021	0.0116064
cg17198320	0.807527	0.862443	0.0549158	hypermethylation	0.0104744	0.0184289
cg17198361	0.6603	0.712689	0.052389	hypermethylation	0.0479326	0.0492002
cg17216583	0.325087	0.273473	-0.0516142	hypomethylation	0.000977743	0.00752456
cg17276646	0.377671	0.327283	-0.0503875	hypomethylation	0.0142997	0.0216624
cg17280705	0.461736	0.389464	-0.0722726	hypomethylation	0.00182738	0.00915462
cg17288498	0.902412	0.849412	-0.0530001	hypomethylation	0.00369996	0.0114567
cg17310600	0.459996	0.405243	-0.0547531	hypomethylation	0.00220969	0.00976368
cg17311440	0.787242	0.733764	-0.0534782	hypomethylation	0.00580713	0.0137292
cg17323040	0.47986	0.425971	-0.0538894	hypomethylation	0.0193306	0.026221
cg17328665	0.790813	0.873292	0.0824791	hypermethylation	0.000312536	0.00527068
cg17330047	0.363484	0.311762	-0.0517217	hypomethylation	0.00888837	0.0170475
cg17344060	0.260472	0.203268	-0.0572046	hypomethylation	0.0114523	0.0191943
cg17348327	0.65839	0.597152	-0.0612382	hypomethylation	0.000890696	0.00735227
cg17349054	0.511922	0.436198	-0.0757239	hypomethylation	0.0214449	0.0279183
cg17380244	0.854432	0.793549	-0.0608836	hypomethylation	0.00932907	0.0174609
cg17391820	0.594557	0.494199	-0.100358	hypomethylation	0.00442389	0.0121983
cg17394403	0.506844	0.451793	-0.0550516	hypomethylation	0.00943513	0.0175681
cg17415025	0.67656	0.728932	0.0523727	hypermethylation	0.0120226	0.0196204
cg17416644	0.478278	0.600608	0.12233	hypermethylation	0.0050111	0.0128095
cg17421060	0.258977	0.320771	0.0617932	hypermethylation	0.0344014	0.0382862
cg17421623	0.285333	0.228372	-0.0569616	hypomethylation	0.000655591	0.00665674
cg17425612	0.773157	0.826227	0.0530694	hypermethylation	0.009407	0.0175589
cg17426923	0.635195	0.584105	-0.0510902	hypomethylation	0.0488965	0.0499457
cg17429662	0.595282	0.544488	-0.0507938	hypomethylation	0.0136705	0.0210695
cg17434154	0.628079	0.572126	-0.0559529	hypomethylation	0.0144919	0.0218287
cg17434643	0.605026	0.554063	-0.0509626	hypomethylation	0.0325562	0.0367349
cg17436656	0.506261	0.434855	-0.0714054	hypomethylation	0.000587982	0.00656407
cg17437930	0.928546	0.872079	-0.0564671	hypomethylation	0.00233947	0.00995302
cg17441181	0.767488	0.829893	0.0624049	hypermethylation	0.0004357	0.00613812
cg17456236	0.476586	0.420947	-0.0556389	hypomethylation	0.028519	0.0335135
cg17465112	0.57127	0.507209	-0.0640612	hypomethylation	0.0161952	0.0234426
cg17499729	0.470402	0.40162	-0.0687818	hypomethylation	0.000473356	0.00624923
cg17502614	0.867074	0.800959	-0.0661155	hypomethylation	0.000496526	0.00627463
cg17511936	0.835991	0.784302	-0.0516889	hypomethylation	0.00571781	0.0136223
cg17535314	0.754208	0.699255	-0.0549534	hypomethylation	0.0129395	0.0204779
cg17565702	0.62785	0.689587	0.061737	hypermethylation	0.00715659	0.0151223
cg17603537	0.331228	0.278462	-0.0527662	hypomethylation	0.0235476	0.0295255
cg17611936	0.729388	0.612405	-0.116984	hypomethylation	0.0275718	0.0326448
cg17612557	0.806739	0.753218	-0.0535211	hypomethylation	0.0122309	0.0198138
cg17618596	0.56314	0.625721	0.0625811	hypermethylation	0.0321605	0.0364187
cg17638213	0.699619	0.63067	-0.0689486	hypomethylation	0.0211266	0.0276194
cg17658113	0.745367	0.652987	-0.0923807	hypomethylation	0.0284147	0.033422
cg17669591	0.815632	0.74904	-0.0665921	hypomethylation	0.0188243	0.0258117
cg17674726	0.358489	0.303897	-0.0545914	hypomethylation	0.0204304	0.0271151
cg17706093	0.315548	0.259995	-0.0555525	hypomethylation	0.003121	0.010812
cg17711870	0.321386	0.271255	-0.0501308	hypomethylation	0.0192671	0.0261489
cg17716930	0.550377	0.488629	-0.0617486	hypomethylation	0.00290841	0.0105962
cg17724687	0.763109	0.845283	0.0821733	hypermethylation	0.000236447	0.00485005
cg17742781	0.44924	0.381184	-0.0680562	hypomethylation	0.00105403	0.00755489
cg17760120	0.914005	0.973835	0.05983	hypermethylation	0.00692702	0.0149258
cg17760307	0.928486	0.877352	-0.0511337	hypomethylation	0.00262827	0.0101238
cg17770382	0.590529	0.535913	-0.0546157	hypomethylation	0.00976229	0.0177196
cg17791491	0.44351	0.366224	-0.0772852	hypomethylation	0.00133605	0.00820079
cg17818285	0.592224	0.528318	-0.0639062	hypomethylation	0.0222239	0.0285639
cg17842822	0.269433	0.214687	-0.0547458	hypomethylation	0.000300471	0.00523647
cg17850273	0.857108	0.806287	-0.0508213	hypomethylation	0.0145183	0.0218424
cg17855743	0.262631	0.200013	-0.0626183	hypomethylation	0.0274346	0.032527
cg17864131	0.923499	0.872505	-0.0509937	hypomethylation	0.0193823	0.0262555
cg17864916	0.899594	0.958145	0.0585507	hypermethylation	0.00868667	0.0168361
cg17878320	0.877847	0.930495	0.0526487	hypermethylation	0.0119774	0.0195886
cg17881572	0.278004	0.20802	-0.0699837	hypomethylation	0.000693234	0.00672842
cg17932010	0.63198	0.688419	0.0564382	hypermethylation	0.00634484	0.0142167
cg17951445	0.395669	0.336839	-0.05883	hypomethylation	0.00851765	0.016659
cg17984201	0.550186	0.488786	-0.0613998	hypomethylation	0.0185592	0.0254899
cg18007806	0.360168	0.306011	-0.0541572	hypomethylation	0.00547002	0.01336
cg18027157	0.881409	0.829497	-0.051912	hypomethylation	0.0218084	0.0282457
cg18031930	0.373493	0.31841	-0.0550825	hypomethylation	0.0151931	0.0225454
cg18039373	0.362254	0.30941	-0.0528445	hypomethylation	0.00228868	0.00980361
cg18067520	0.796367	0.848609	0.0522421	hypermethylation	0.000119853	0.00373321
cg18086868	0.542062	0.474942	-0.0671198	hypomethylation	0.00565944	0.0135798
cg18092479	0.588238	0.536768	-0.0514706	hypomethylation	0.0023945	0.00995302
cg18121641	0.953402	0.897622	-0.05578	hypomethylation	0.00317975	0.010812
cg18157976	0.898325	0.949021	0.0506965	hypermethylation	0.0266406	0.0318521
cg18163325	0.552415	0.64695	0.0945353	hypermethylation	0.0436027	0.0456661
cg18171855	0.698401	0.779537	0.0811357	hypermethylation	0.0174877	0.0246103
cg18180096	0.279419	0.212291	-0.0671286	hypomethylation	0.00784748	0.015883
cg18186324	0.780722	0.835537	0.054815	hypermethylation	0.0248993	0.0306326
cg18188350	0.502337	0.428962	-0.0733749	hypomethylation	0.00180947	0.00914889
cg18193450	0.359763	0.309628	-0.0501346	hypomethylation	0.0115834	0.0192903
cg18197594	0.470626	0.529927	0.0593012	hypermethylation	0.00427095	0.0120129
cg18232861	0.263745	0.212314	-0.0514308	hypomethylation	0.0133889	0.0208436
cg18256008	0.913784	0.859533	-0.0542511	hypomethylation	0.00918174	0.0173395
cg18261836	0.896835	0.947768	0.0509327	hypermethylation	0.0233516	0.0294434
cg18269963	0.437455	0.349625	-0.0878303	hypomethylation	0.00313494	0.010812
cg18270009	0.278	0.225181	-0.0528187	hypomethylation	0.0134001	0.0208436
cg18277815	0.443054	0.389919	-0.0531356	hypomethylation	0.00326201	0.0110067
cg18310495	0.333167	0.274461	-0.0587064	hypomethylation	0.00530814	0.0131945
cg18313094	0.454747	0.392264	-0.0624827	hypomethylation	0.0355292	0.0391284
cg18319102	0.420404	0.500074	0.0796697	hypermethylation	0.0205014	0.0271951
cg18331339	0.463464	0.412631	-0.0508332	hypomethylation	0.0336819	0.0376015
cg18366758	0.389495	0.333258	-0.0562378	hypomethylation	0.0446084	0.046507
cg18373158	0.70507	0.763492	0.0584221	hypermethylation	0.0446889	0.0465717
cg18373855	0.584633	0.644534	0.0599013	hypermethylation	0.0252019	0.0308284
cg18388786	0.209741	0.156452	-0.0532886	hypomethylation	0.00260603	0.0101083
cg18397450	0.181608	0.238235	0.0566264	hypermethylation	0.0465239	0.0480867
cg18402546	0.852766	0.933514	0.0807483	hypermethylation	7.0083e-06	0.00176819
cg18482690	0.63793	0.699634	0.0617036	hypermethylation	0.0182775	0.0251852
cg18489038	0.689884	0.62692	-0.0629638	hypomethylation	0.023875	0.0297481
cg18506020	0.810624	0.748489	-0.0621344	hypomethylation	0.000649968	0.00665674
cg18556587	0.790836	0.73366	-0.0571762	hypomethylation	0.00459439	0.0123427
cg18560283	0.735967	0.80182	0.065853	hypermethylation	0.00200731	0.00945841
cg18565204	0.797468	0.944249	0.146781	hypermethylation	0.0203117	0.0270434
cg18570243	0.264263	0.211615	-0.0526482	hypomethylation	0.00604855	0.0139711
cg18581746	0.830443	0.778066	-0.0523776	hypomethylation	0.00136941	0.00824586
cg18587476	0.518701	0.592233	0.0735318	hypermethylation	0.000256672	0.00500174
cg18595174	0.821485	0.759331	-0.0621548	hypomethylation	0.00506438	0.0129065
cg18598695	0.726599	0.646131	-0.0804679	hypomethylation	0.00567681	0.0135798
cg18602667	0.318685	0.24355	-0.0751349	hypomethylation	0.0022293	0.00977469
cg18634538	0.626585	0.569658	-0.0569271	hypomethylation	0.00214057	0.00969596
cg18635968	0.0867144	0.025048	-0.0616664	hypomethylation	0.00955002	0.0176389
cg18640514	0.483576	0.429799	-0.053777	hypomethylation	0.0341517	0.0380755
cg18653405	0.883614	0.826726	-0.0568877	hypomethylation	0.00642546	0.0143148
cg18665594	0.513402	0.451036	-0.0623664	hypomethylation	0.0320183	0.0363229
cg18684142	0.613583	0.674723	0.0611401	hypermethylation	0.00951092	0.0176312
cg18689929	0.616076	0.558378	-0.0576979	hypomethylation	0.0032612	0.0110067
cg18706647	0.666713	0.615338	-0.051375	hypomethylation	0.0121154	0.019708
cg18715220	0.454563	0.404057	-0.0505057	hypomethylation	0.0200556	0.0268537
cg18715230	0.646499	0.589028	-0.0574711	hypomethylation	0.00642902	0.0143148
cg18731202	0.883616	0.764477	-0.119139	hypomethylation	8.44145e-05	0.00334566
cg18742001	0.256754	0.199438	-0.0573168	hypomethylation	0.00189411	0.00929705
cg18747379	0.646968	0.705596	0.0586277	hypermethylation	0.0211388	0.0276194
cg18748354	0.606128	0.555072	-0.0510561	hypomethylation	0.0206965	0.0272959
cg18757227	0.828334	0.880978	0.0526439	hypermethylation	0.0329118	0.0370218
cg18772285	0.675397	0.622023	-0.053374	hypomethylation	0.0282613	0.0332882
cg18822271	0.526312	0.465669	-0.0606425	hypomethylation	0.00559056	0.0135236
cg18825766	0.332057	0.267285	-0.0647718	hypomethylation	0.00738887	0.0153686
cg18837378	0.53895	0.48651	-0.0524403	hypomethylation	0.00655746	0.0144537
cg18840355	0.690156	0.74219	0.0520334	hypermethylation	0.00866458	0.0168159
cg18847227	0.62103	0.542056	-0.0789744	hypomethylation	0.00368232	0.0114567
cg18863119	0.72192	0.775587	0.0536668	hypermethylation	0.0259885	0.0314127
cg18909982	0.639415	0.589249	-0.0501658	hypomethylation	0.00168347	0.00894445
cg18933685	0.295669	0.224654	-0.0710149	hypomethylation	0.00755604	0.0155714
cg18939097	0.314158	0.253387	-0.0607717	hypomethylation	0.00223131	0.00977469
cg18963535	0.846593	0.796304	-0.0502894	hypomethylation	0.0250445	0.0307331
cg18968409	0.508878	0.458026	-0.0508523	hypomethylation	0.0177697	0.0247832
cg18974450	0.595787	0.525215	-0.0705721	hypomethylation	0.012151	0.0197405
cg18977541	0.202553	0.279444	0.07689	hypermethylation	0.000766082	0.0069826
cg18979292	0.427087	0.37646	-0.0506269	hypomethylation	0.0298518	0.0345804
cg19008097	0.431833	0.375258	-0.0565753	hypomethylation	0.00246974	0.00995302
cg19034636	0.695968	0.638319	-0.057649	hypomethylation	0.00627903	0.0141826
cg19092981	0.498288	0.574347	0.076059	hypermethylation	0.00470562	0.0124671
cg19093689	0.444154	0.495911	0.051757	hypermethylation	0.00207059	0.00952316
cg19095920	0.187152	0.133332	-0.0538205	hypomethylation	0.000660989	0.00665674
cg19106932	0.293138	0.363707	0.0705693	hypermethylation	0.00303038	0.0107272
cg19110327	0.907259	0.826064	-0.081195	hypomethylation	0.000132101	0.00387548
cg19110349	0.708131	0.768921	0.0607896	hypermethylation	0.00885104	0.0170077
cg19112148	0.62203	0.689067	0.0670372	hypermethylation	0.0472229	0.0485921
cg19113954	0.0497664	0.115252	0.0654856	hypermethylation	0.00675536	0.0147183
cg19119365	0.61557	0.564578	-0.0509918	hypomethylation	0.0268673	0.0320219
cg19121311	0.381862	0.330013	-0.0518487	hypomethylation	0.0228151	0.0291014
cg19127638	0.74444	0.803472	0.0590329	hypermethylation	0.00825462	0.0164057
cg19139729	0.729496	0.783007	0.0535111	hypermethylation	0.00357868	0.0114567
cg19139858	0.892826	0.9436	0.0507736	hypermethylation	0.0182605	0.0251755
cg19142026	0.320186	0.387179	0.0669923	hypermethylation	0.0133735	0.0208436
cg19152255	0.421309	0.371243	-0.0500659	hypomethylation	0.0398411	0.042628
cg19155391	0.229985	0.162465	-0.0675198	hypomethylation	0.00386791	0.0116453
cg19198148	0.840834	0.7638	-0.0770345	hypomethylation	0.00190551	0.00929705
cg19206078	0.703971	0.643817	-0.0601533	hypomethylation	0.00363152	0.0114567
cg19263607	0.621928	0.570535	-0.0513927	hypomethylation	0.0246484	0.0303949
cg19268720	0.679512	0.619658	-0.0598545	hypomethylation	0.00513058	0.0129933
cg19307809	0.741107	0.683656	-0.0574514	hypomethylation	0.00317436	0.010812
cg19311153	0.416026	0.35727	-0.0587563	hypomethylation	0.0112753	0.0190923
cg19325985	0.246386	0.192668	-0.0537181	hypomethylation	1.86396e-05	0.00242755
cg19333447	0.800761	0.746926	-0.0538345	hypomethylation	0.000982106	0.00752456
cg19346203	0.551625	0.500637	-0.050988	hypomethylation	0.0136055	0.0210077
cg19375981	0.578729	0.527049	-0.0516803	hypomethylation	0.0233442	0.0294434
cg19387053	0.76079	0.703467	-0.0573237	hypomethylation	0.00508687	0.0129377
cg19403586	0.912692	0.856617	-0.0560749	hypomethylation	0.000902068	0.00740864
cg19418162	0.910992	0.855689	-0.0553034	hypomethylation	0.00620297	0.0141535
cg19424457	0.584053	0.685598	0.101545	hypermethylation	0.00711626	0.0150807
cg19431274	0.206753	0.155517	-0.0512356	hypomethylation	0.00166918	0.00893343
cg19442006	0.793978	0.850731	0.0567525	hypermethylation	0.00362159	0.0114567
cg19451011	0.806472	0.742667	-0.0638055	hypomethylation	0.00370012	0.0114567
cg19486318	0.635105	0.580037	-0.0550672	hypomethylation	0.00143798	0.00846892
cg19494702	0.121916	0.191267	0.0693505	hypermethylation	0.0176566	0.0247078
cg19503359	0.687312	0.632655	-0.0546562	hypomethylation	0.000160543	0.00417577
cg19523166	0.650215	0.593622	-0.0565926	hypomethylation	0.0253476	0.0309545
cg19531545	0.721582	0.66865	-0.0529321	hypomethylation	0.00286643	0.0105814
cg19536401	0.367379	0.313161	-0.0542177	hypomethylation	0.0182033	0.0251655
cg19546703	0.160578	0.102467	-0.0581107	hypomethylation	0.00447635	0.0122759
cg19550890	0.358294	0.272127	-0.0861672	hypomethylation	5.29458e-05	0.00318099
cg19553598	0.450409	0.39576	-0.0546496	hypomethylation	0.0258595	0.0313218
cg19560781	0.612047	0.500678	-0.111369	hypomethylation	0.000496843	0.00627463
cg19560831	0.760747	0.819858	0.0591106	hypermethylation	0.0178992	0.0248765
cg19563976	0.910761	0.849239	-0.0615228	hypomethylation	0.000976814	0.00752456
cg19570618	0.707187	0.630742	-0.0764444	hypomethylation	0.0308895	0.0353604
cg19571801	0.852767	0.7951	-0.0576667	hypomethylation	0.00123473	0.00805495
cg19571972	0.320572	0.259445	-0.0611278	hypomethylation	0.000280557	0.00518472
cg19575753	0.884222	0.934773	0.0505507	hypermethylation	0.0251183	0.0308087
cg19579217	0.523657	0.584392	0.0607349	hypermethylation	0.01732	0.0244535
cg19611300	0.800209	0.749925	-0.0502842	hypomethylation	0.00623089	0.0141754
cg19636673	0.48679	0.424957	-0.0618328	hypomethylation	0.0128083	0.0204011
cg19650936	0.323999	0.252086	-0.0719126	hypomethylation	0.00658822	0.0144792
cg19671143	0.501492	0.449831	-0.0516615	hypomethylation	0.011233	0.0190846
cg19696117	0.923022	0.858915	-0.0641071	hypomethylation	0.0138542	0.0212505
cg19696891	0.40034	0.45186	0.0515197	hypermethylation	0.00423195	0.0120039
cg19735514	0.499292	0.427904	-0.071388	hypomethylation	0.000287953	0.00518933
cg19741767	0.69322	0.749776	0.0565561	hypermethylation	0.00250786	0.00995302
cg19768234	0.852003	0.782235	-0.0697686	hypomethylation	0.00245759	0.00995302
cg19817980	0.489342	0.424218	-0.0651239	hypomethylation	0.00408469	0.011818
cg19832721	0.503779	0.424683	-0.079096	hypomethylation	0.0108719	0.0188045
cg19851529	0.561136	0.478004	-0.0831311	hypomethylation	0.00219596	0.00975424
cg19859910	0.858296	0.807311	-0.050985	hypomethylation	0.00730395	0.0152928
cg19880597	0.51651	0.463184	-0.0533264	hypomethylation	0.0155588	0.0228492
cg19881928	0.224721	0.28682	0.0620992	hypermethylation	0.00363539	0.0114567
cg19884619	0.529993	0.473946	-0.0560465	hypomethylation	0.00630423	0.0141942
cg19884937	0.324309	0.265053	-0.0592561	hypomethylation	0.0329888	0.0370654
cg19903766	0.444179	0.376999	-0.0671798	hypomethylation	0.0133871	0.0208436
cg19907915	0.781662	0.831823	0.050161	hypermethylation	0.0303623	0.034995
cg19909400	0.354022	0.298364	-0.0556586	hypomethylation	0.0342751	0.0381625
cg19910601	0.638703	0.587156	-0.0515474	hypomethylation	0.024357	0.0301321
cg19912309	0.71166	0.632732	-0.0789287	hypomethylation	9.28245e-05	0.00334566
cg19922558	0.759553	0.704749	-0.0548046	hypomethylation	0.00620819	0.0141535
cg19940438	0.404247	0.331462	-0.0727848	hypomethylation	0.00266251	0.0102401
cg19945931	0.481599	0.574968	0.0933691	hypermethylation	0.000275011	0.00513966
cg19963839	0.588578	0.658424	0.0698453	hypermethylation	0.00414273	0.0119153
cg19969391	0.585928	0.532063	-0.0538654	hypomethylation	0.0332288	0.037244
cg19979453	0.547963	0.49177	-0.0561925	hypomethylation	0.0160665	0.0232965
cg19979574	0.803023	0.750757	-0.0522658	hypomethylation	0.0369325	0.0403554
cg19984499	0.848147	0.779753	-0.0683947	hypomethylation	0.0221073	0.0284866
cg19985056	0.0428156	0.0962198	0.0534042	hypermethylation	0.0298504	0.0345804
cg20007021	0.178954	0.27859	0.0996355	hypermethylation	0.0012941	0.00814217
cg20070659	0.786545	0.842432	0.0558873	hypermethylation	0.015544	0.0228407
cg20075528	0.693048	0.636344	-0.0567044	hypomethylation	0.00688961	0.0148823
cg20107184	0.935067	0.878704	-0.0563634	hypomethylation	0.00100754	0.00752456
cg20109624	0.655393	0.582753	-0.0726404	hypomethylation	0.0092776	0.0174162
cg20122518	0.445491	0.387448	-0.0580431	hypomethylation	0.00567977	0.0135798
cg20123217	0.649903	0.710779	0.0608763	hypermethylation	0.0286317	0.0336114
cg20124409	0.890583	0.940999	0.0504159	hypermethylation	0.0300878	0.0347898
cg20124410	0.501292	0.582437	0.0811457	hypermethylation	0.0412346	0.0437489
cg20128319	0.587804	0.534011	-0.0537933	hypomethylation	0.00473709	0.0124671
cg20133046	0.656157	0.57597	-0.0801872	hypomethylation	0.00517776	0.0130244
cg20138617	0.909569	0.961205	0.0516358	hypermethylation	0.023468	0.0294859
cg20198387	0.414371	0.343881	-0.0704898	hypomethylation	0.0051345	0.0129933
cg20202463	0.690749	0.632804	-0.0579446	hypomethylation	0.00543713	0.01336
cg20203628	0.756911	0.811442	0.054531	hypermethylation	0.00103111	0.00752456
cg20217592	0.555131	0.486933	-0.0681981	hypomethylation	0.0141348	0.0215091
cg20223994	0.919483	0.861766	-0.0577174	hypomethylation	0.00226797	0.00977469
cg20241604	0.648873	0.594888	-0.0539847	hypomethylation	0.00299722	0.0106808
cg20246056	0.864214	0.790578	-0.0736356	hypomethylation	0.00350673	0.0113825
cg20250700	0.92918	0.877034	-0.0521458	hypomethylation	0.00669435	0.0146106
cg20251837	0.821001	0.764373	-0.0566277	hypomethylation	0.0259967	0.0314127
cg20252837	0.597724	0.545654	-0.0520702	hypomethylation	0.0304094	0.0350013
cg20253251	0.797786	0.746034	-0.0517521	hypomethylation	0.00316966	0.010812
cg20254293	0.633183	0.563187	-0.0699959	hypomethylation	0.00240718	0.00995302
cg20255085	0.659063	0.602682	-0.0563819	hypomethylation	0.00131183	0.00820079
cg20263889	0.749968	0.668014	-0.0819534	hypomethylation	0.0046127	0.0123427
cg20270320	0.106456	0.0496338	-0.056822	hypomethylation	0.00532607	0.0132261
cg20279471	0.124836	0.194588	0.0697521	hypermethylation	0.0191875	0.0261252
cg20313807	0.893796	0.838655	-0.0551408	hypomethylation	0.00352168	0.0113825
cg20320128	0.757628	0.682981	-0.0746468	hypomethylation	0.00624999	0.0141826
cg20338393	0.786675	0.730176	-0.0564991	hypomethylation	0.00132932	0.00820079
cg20357534	0.352853	0.289215	-0.0636375	hypomethylation	0.00606433	0.0139711
cg20359051	0.879628	0.824807	-0.0548212	hypomethylation	0.0034257	0.0112685
cg20388496	0.26246	0.206871	-0.0555892	hypomethylation	0.0135484	0.0209581
cg20415435	0.816254	0.738837	-0.0774163	hypomethylation	0.00102452	0.00752456
cg20430773	0.433597	0.501847	0.0682495	hypermethylation	0.0136245	0.0210194
cg20431785	0.749122	0.678302	-0.0708193	hypomethylation	0.0130599	0.0205809
cg20433858	0.382555	0.302126	-0.0804288	hypomethylation	0.0193872	0.0262555
cg20441661	0.767873	0.691348	-0.0765248	hypomethylation	0.00166525	0.00893343
cg20461484	0.598545	0.548019	-0.0505256	hypomethylation	0.0328511	0.0369849
cg20472016	0.833135	0.78054	-0.0525949	hypomethylation	0.0184723	0.025412
cg20483374	0.56528	0.431575	-0.133706	hypomethylation	0.0039874	0.0116665
cg20497668	0.777763	0.722011	-0.055752	hypomethylation	0.00169241	0.00895169
cg20506240	0.753612	0.836609	0.0829963	hypermethylation	8.52244e-05	0.00334566
cg20540723	0.895853	0.808978	-0.0868741	hypomethylation	0.0173861	0.0245194
cg20555413	0.849551	0.784704	-0.0648472	hypomethylation	0.00749299	0.0155085
cg20559537	0.507965	0.445805	-0.0621603	hypomethylation	0.00172841	0.0090469
cg20580177	0.652502	0.593302	-0.0592001	hypomethylation	0.00421029	0.0120029
cg20595735	0.777517	0.840676	0.0631589	hypermethylation	0.0432922	0.0454352
cg20640808	0.657495	0.721004	0.0635088	hypermethylation	0.0084224	0.0165717
cg20641450	0.854522	0.797883	-0.0566392	hypomethylation	0.0371155	0.0405203
cg20645911	0.716062	0.795236	0.0791739	hypermethylation	0.00134484	0.00820454
cg20648333	0.9002	0.832336	-0.0678643	hypomethylation	0.04589	0.047529
cg20649298	0.600396	0.532643	-0.0677533	hypomethylation	0.0198039	0.0266339
cg20668607	0.839375	0.784134	-0.0552408	hypomethylation	0.0198927	0.0267248
cg20671534	0.7896	0.723282	-0.0663187	hypomethylation	0.00174566	0.00908873
cg20675702	0.507117	0.6086	0.101484	hypermethylation	1.41515e-05	0.00242755
cg20690028	0.422885	0.362002	-0.0608831	hypomethylation	0.00182985	0.00915462
cg20696605	0.525389	0.447013	-0.078376	hypomethylation	0.000143789	0.0040043
cg20701556	0.613148	0.675752	0.0626047	hypermethylation	0.0237732	0.0296636
cg20717585	0.548952	0.486081	-0.0628714	hypomethylation	0.0458417	0.0474991
cg20729586	0.77257	0.70991	-0.0626593	hypomethylation	0.0179411	0.0248985
cg20771596	0.592146	0.663593	0.0714477	hypermethylation	0.0249817	0.0307008
cg20795907	0.906817	0.848364	-0.0584533	hypomethylation	0.00350909	0.0113825
cg20803796	0.194609	0.142517	-0.0520922	hypomethylation	0.00312514	0.010812
cg20808464	0.703496	0.639824	-0.0636716	hypomethylation	0.00133304	0.00820079
cg20823187	0.781643	0.726721	-0.0549222	hypomethylation	0.0255896	0.0311746
cg20845050	0.592645	0.535776	-0.0568688	hypomethylation	0.00964047	0.0176965
cg20860806	0.642949	0.577789	-0.0651596	hypomethylation	0.0130403	0.0205809
cg20900466	0.933779	0.879371	-0.0544083	hypomethylation	0.00277603	0.0104548
cg20901665	0.773768	0.716389	-0.0573795	hypomethylation	7.81697e-05	0.00334566
cg20906335	0.376807	0.320933	-0.0558742	hypomethylation	0.00208732	0.00952316
cg20909234	0.212008	0.146179	-0.0658289	hypomethylation	0.0279068	0.0329475
cg20946898	0.432642	0.357826	-0.0748155	hypomethylation	0.00240777	0.00995302
cg20964064	0.409311	0.483884	0.0745723	hypermethylation	0.000205948	0.00471042
cg20964588	0.421206	0.36812	-0.0530861	hypomethylation	0.0021829	0.00973628
cg20971956	0.259638	0.190676	-0.0689616	hypomethylation	6.08737e-05	0.00318099
cg21012125	0.397894	0.336318	-0.0615762	hypomethylation	0.00274082	0.0104042
cg21026199	0.751197	0.688482	-0.0627143	hypomethylation	0.00791241	0.0159449
cg21038291	0.379272	0.322826	-0.0564461	hypomethylation	0.0293426	0.0341788
cg21046358	0.240443	0.184686	-0.0557572	hypomethylation	0.00163722	0.00886416
cg21051232	0.393604	0.329337	-0.0642676	hypomethylation	0.0390549	0.0420552
cg21052687	0.53968	0.488879	-0.0508014	hypomethylation	0.0241682	0.0300377
cg21060796	0.223514	0.168297	-0.0552174	hypomethylation	0.00373593	0.0114808
cg21072629	0.13084	0.184968	0.0541279	hypermethylation	0.00859748	0.0167293
cg21075118	0.866203	0.805597	-0.0606054	hypomethylation	0.000881402	0.00731505
cg21079003	0.430063	0.374086	-0.0559769	hypomethylation	0.0394738	0.0423617
cg21084943	0.465635	0.407802	-0.0578329	hypomethylation	0.000823768	0.00708093
cg21117808	0.761783	0.812358	0.0505744	hypermethylation	0.0468189	0.0483323
cg21148531	0.83188	0.889741	0.0578613	hypermethylation	0.0031304	0.010812
cg21167402	0.163455	0.225477	0.0620222	hypermethylation	0.0482502	0.0494393
cg21178254	0.608235	0.557173	-0.0510619	hypomethylation	0.00291969	0.0105991
cg21178689	0.484549	0.534966	0.0504166	hypermethylation	0.00735725	0.0153424
cg21180839	0.810862	0.749922	-0.0609399	hypomethylation	0.000814173	0.00705896
cg21204606	0.394573	0.340309	-0.0542636	hypomethylation	0.021402	0.0278912
cg21212819	0.567488	0.493531	-0.0739571	hypomethylation	0.0140091	0.0213977
cg21214232	0.334974	0.282522	-0.0524517	hypomethylation	0.00067566	0.00671138
cg21225412	0.39571	0.34544	-0.0502698	hypomethylation	0.00747386	0.0154816
cg21243725	0.888415	0.824179	-0.0642359	hypomethylation	0.00541643	0.01336
cg21245975	0.0346907	0.111109	0.0764179	hypermethylation	0.0331023	0.0371517
cg21256907	0.342613	0.280734	-0.0618786	hypomethylation	0.00077986	0.0069826
cg21266975	0.513073	0.454912	-0.0581612	hypomethylation	0.0228427	0.0291219
cg21283066	0.345935	0.294901	-0.0510344	hypomethylation	0.0266507	0.0318521
cg21323720	0.252071	0.200485	-0.0515862	hypomethylation	0.00120178	0.00797918
cg21326516	0.909451	0.843223	-0.0662275	hypomethylation	6.20856e-05	0.00318099
cg21329660	0.766549	0.716523	-0.0500263	hypomethylation	0.00174714	0.00908873
cg21337580	0.398853	0.341832	-0.0570214	hypomethylation	0.0239154	0.0297789
cg21340230	0.506057	0.44932	-0.0567375	hypomethylation	0.00724067	0.0152165
cg21341928	0.374747	0.43644	0.0616928	hypermethylation	0.00460657	0.0123427
cg21354581	0.856728	0.798374	-0.058354	hypomethylation	0.0070841	0.0150807
cg21372733	0.665329	0.612484	-0.0528459	hypomethylation	0.00134629	0.00820454
cg21379099	0.304366	0.242415	-0.0619506	hypomethylation	0.0037082	0.0114654
cg21395252	0.848483	0.756343	-0.0921404	hypomethylation	0.000625469	0.00665674
cg21397393	0.561281	0.612108	0.0508273	hypermethylation	0.00790053	0.0159449
cg21401457	0.459202	0.538435	0.0792337	hypermethylation	0.0213609	0.0278519
cg21450784	0.813352	0.863792	0.0504407	hypermethylation	0.00401452	0.0116824
cg21455751	0.810651	0.755483	-0.0551679	hypomethylation	0.00334841	0.0111305
cg21477591	0.482319	0.541445	0.0591261	hypermethylation	0.0200312	0.0268394
cg21493483	0.442576	0.365139	-0.0774365	hypomethylation	8.98457e-05	0.00334566
cg21526530	0.693399	0.634931	-0.0584682	hypomethylation	0.00439951	0.0121577
cg21544219	0.706528	0.641531	-0.0649972	hypomethylation	0.0137462	0.0211087
cg21550877	0.677692	0.621159	-0.0565326	hypomethylation	0.00986268	0.0178054
cg21566642	0.480891	0.535747	0.0548556	hypermethylation	0.0239636	0.0298128
cg21579107	0.574402	0.635093	0.0606913	hypermethylation	0.0032906	0.0110373
cg21582662	0.2476	0.188894	-0.0587062	hypomethylation	0.0020264	0.00945841
cg21610390	0.663949	0.607252	-0.0566975	hypomethylation	0.00314392	0.010812
cg21610839	0.644275	0.583624	-0.0606515	hypomethylation	0.000458323	0.00623855
cg21617694	0.578058	0.516378	-0.0616793	hypomethylation	0.0134165	0.020847
cg21624697	0.930777	0.879801	-0.0509764	hypomethylation	0.00180467	0.00914889
cg21648744	0.697183	0.754202	0.0570189	hypermethylation	0.00385124	0.0116192
cg21665850	0.831011	0.896027	0.065016	hypermethylation	0.0158719	0.0231205
cg21667998	0.344124	0.292756	-0.0513689	hypomethylation	0.00279596	0.0104662
cg21681168	0.370283	0.422152	0.0518685	hypermethylation	0.0105281	0.0184552
cg21724010	0.486876	0.422979	-0.0638969	hypomethylation	0.00161055	0.0087686
cg21735522	0.374583	0.322325	-0.0522587	hypomethylation	0.00370024	0.0114567
cg21738464	0.921368	0.866019	-0.0553491	hypomethylation	0.0156804	0.0229334
cg21743307	0.522695	0.461694	-0.0610018	hypomethylation	0.028277	0.0332911
cg21746633	0.850717	0.774585	-0.0761323	hypomethylation	0.000218165	0.00471042
cg21764944	0.438303	0.37429	-0.0640129	hypomethylation	0.0254994	0.031081
cg21778743	0.304561	0.367467	0.0629052	hypermethylation	0.0171796	0.0243781
cg21780796	0.684764	0.634041	-0.0507237	hypomethylation	0.00437122	0.0121193
cg21784396	0.301514	0.359284	0.0577703	hypermethylation	7.05501e-05	0.0032687
cg21787089	0.851175	0.645182	-0.205993	hypomethylation	0.00229994	0.00983516
cg21790413	0.386449	0.28017	-0.106279	hypomethylation	0.00848907	0.0166546
cg21794496	0.446461	0.393513	-0.0529476	hypomethylation	0.0224099	0.0287006
cg21811021	0.812014	0.865973	0.0539596	hypermethylation	0.00103837	0.00752599
cg21811967	0.503225	0.452089	-0.0511354	hypomethylation	0.0272632	0.0323542
cg21814292	0.583145	0.509997	-0.0731486	hypomethylation	0.0109251	0.0188407
cg21816963	0.359667	0.292277	-0.0673905	hypomethylation	0.00111893	0.00775568
cg21857867	0.793352	0.73851	-0.0548425	hypomethylation	0.0249086	0.0306326
cg21886743	0.86375	0.801541	-0.0622091	hypomethylation	0.000179312	0.00426796
cg21893059	0.898414	0.828531	-0.0698826	hypomethylation	2.68096e-05	0.00252693
cg21915523	0.762104	0.684624	-0.0774793	hypomethylation	0.000256359	0.00500174
cg21938894	0.65946	0.598907	-0.0605528	hypomethylation	0.0279395	0.0329707
cg21949858	0.618595	0.725896	0.1073	hypermethylation	0.000718154	0.00684358
cg21954085	0.771091	0.70616	-0.0649302	hypomethylation	0.0013957	0.00832472
cg21967790	0.535617	0.479345	-0.0562719	hypomethylation	0.00826201	0.0164057
cg22024931	0.887244	0.817756	-0.0694877	hypomethylation	0.0233398	0.0294434
cg22034261	0.834318	0.772336	-0.0619817	hypomethylation	0.00201634	0.00945841
cg22035278	0.518527	0.467992	-0.0505348	hypomethylation	0.00458265	0.0123427
cg22048216	0.291853	0.360546	0.0686934	hypermethylation	0.00769641	0.0157486
cg22124215	0.86226	0.807072	-0.0551875	hypomethylation	0.00295604	0.0106808
cg22130090	0.824013	0.764275	-0.0597388	hypomethylation	0.00341033	0.0112431
cg22138735	0.394517	0.447476	0.0529586	hypermethylation	0.0234332	0.0294726
cg22140793	0.87586	0.819021	-0.0568391	hypomethylation	0.00974063	0.0177129
cg22179042	0.867395	0.813661	-0.0537335	hypomethylation	0.00227013	0.00977469
cg22186497	0.208945	0.154548	-0.0543967	hypomethylation	0.000904424	0.00740864
cg22189786	0.346796	0.417674	0.0708782	hypermethylation	0.0163977	0.0236407
[truncated: 474 more rows]

## Sheet: Supplementary Table 4
CpG	controls_PL_AVG	cases_PL_BRCA1_epimut_AVG	deltaBeta	DNA_methylation_status	P.Value	adj.P.Val
cg00000029	0.484799	0.43197	-0.0528292	hypomethylation	0.0148798	0.0221261
cg00011856	0.621324	0.560404	-0.0609201	hypomethylation	0.00723688	0.0141827
cg00017489	0.303769	0.247151	-0.0566182	hypomethylation	0.00800033	0.015114
cg00023231	0.254212	0.203291	-0.050921	hypomethylation	0.000315489	0.00414967
cg00030584	0.252036	0.194694	-0.0573419	hypomethylation	0.00413939	0.0107279
cg00030918	0.857132	0.798797	-0.0583351	hypomethylation	0.00407273	0.0106385
cg00036119	0.429622	0.373609	-0.0560129	hypomethylation	0.01584	0.0230404
cg00047185	0.727287	0.670185	-0.0571021	hypomethylation	0.00934327	0.0166139
cg00058436	0.728673	0.788265	0.0595923	hypermethylation	0.0132097	0.0204798
cg00065261	0.611216	0.559463	-0.0517535	hypomethylation	0.000433794	0.00456878
cg00067133	0.497414	0.444774	-0.0526396	hypomethylation	0.0144165	0.021679
cg00073299	0.305236	0.253332	-0.0519036	hypomethylation	0.000987567	0.0060276
cg00081854	0.715406	0.663553	-0.0518533	hypomethylation	0.00635974	0.0132723
cg00085013	0.387911	0.330371	-0.0575396	hypomethylation	0.000132745	0.00322402
cg00086921	0.650681	0.599092	-0.0515895	hypomethylation	0.00358552	0.0100009
cg00088989	0.921576	0.870966	-0.0506105	hypomethylation	0.0208269	0.0277312
cg00092235	0.63124	0.69598	0.0647397	hypermethylation	0.0263508	0.0328388
cg00092687	0.922447	0.853028	-0.0694195	hypomethylation	0.000273994	0.00394651
cg00093542	0.306461	0.251408	-0.0550533	hypomethylation	0.00194659	0.00776418
cg00100549	0.901298	0.846899	-0.0543989	hypomethylation	0.0109329	0.0182748
cg00101154	0.644214	0.53569	-0.108524	hypomethylation	0.0312004	0.0371869
cg00116583	0.825541	0.752176	-0.0733654	hypomethylation	0.00481931	0.011609
cg00117018	0.607946	0.529728	-0.0782175	hypomethylation	0.0265879	0.0330755
cg00119127	0.810341	0.862415	0.0520749	hypermethylation	0.00755219	0.0146055
cg00121876	0.272469	0.215584	-0.0568846	hypomethylation	0.00484828	0.0116238
cg00123225	0.463541	0.406664	-0.056877	hypomethylation	0.0088586	0.0160802
cg00124920	0.839664	0.763135	-0.0765285	hypomethylation	0.0067411	0.0136503
cg00125768	0.358236	0.292127	-0.0661087	hypomethylation	0.002553	0.00861569
cg00126412	0.455726	0.387139	-0.068587	hypomethylation	0.00698075	0.0139349
cg00139234	0.846703	0.789902	-0.0568008	hypomethylation	0.0141165	0.0214284
cg00153919	0.309042	0.25427	-0.0547721	hypomethylation	0.0127062	0.0199974
cg00154455	0.913367	0.856769	-0.0565984	hypomethylation	0.00835168	0.015536
cg00157319	0.846891	0.795806	-0.0510848	hypomethylation	9.5091e-05	0.00287104
cg00177239	0.340718	0.290486	-0.0502322	hypomethylation	0.00832202	0.0154963
cg00190713	0.907405	0.854205	-0.0532	hypomethylation	0.00553551	0.0124401
cg00200283	0.464709	0.399272	-0.065437	hypomethylation	0.0455129	0.0495259
cg00225196	0.422212	0.35887	-0.0633419	hypomethylation	0.0202034	0.0271853
cg00226689	0.885811	0.823505	-0.0623063	hypomethylation	0.00559315	0.0124854
cg00231483	0.369674	0.302647	-0.0670267	hypomethylation	9.25741e-05	0.00284303
cg00231918	0.58549	0.533121	-0.0523689	hypomethylation	0.00590007	0.0128331
cg00232105	0.562139	0.512131	-0.0500076	hypomethylation	0.00387564	0.0103364
cg00232500	0.784934	0.728157	-0.0567776	hypomethylation	0.0017518	0.0074886
cg00238249	0.437593	0.382762	-0.0548303	hypomethylation	0.00273314	0.00877578
cg00250645	0.612176	0.542436	-0.0697405	hypomethylation	0.0273429	0.0337153
cg00251125	0.430755	0.370153	-0.0606024	hypomethylation	0.000325389	0.00414967
cg00266865	0.531999	0.584648	0.0526489	hypermethylation	0.000205759	0.00353782
cg00269817	0.372476	0.319133	-0.0533428	hypomethylation	0.0225297	0.0293226
cg00276548	0.440935	0.386072	-0.054863	hypomethylation	0.0190213	0.0260583
cg00277039	0.389377	0.334012	-0.0553652	hypomethylation	0.00667439	0.0136087
cg00278517	0.23646	0.175448	-0.0610121	hypomethylation	0.000508357	0.00481305
cg00281200	0.884243	0.832386	-0.0518567	hypomethylation	0.00341192	0.00978375
cg00296348	0.288893	0.231449	-0.0574438	hypomethylation	0.0117942	0.0190767
cg00301120	0.400673	0.326375	-0.0742982	hypomethylation	0.0324816	0.0381908
cg00301902	0.924629	0.873811	-0.050818	hypomethylation	0.000414741	0.004521
cg00305108	0.450241	0.393858	-0.0563826	hypomethylation	0.0149818	0.0222248
cg00309965	0.6975	0.647211	-0.050289	hypomethylation	0.00308929	0.00930107
cg00315394	0.788537	0.738162	-0.0503756	hypomethylation	1.37125e-05	0.00139956
cg00318109	0.725915	0.609993	-0.115922	hypomethylation	0.0135364	0.0208192
cg00319686	0.354535	0.292606	-0.0619284	hypomethylation	0.0407464	0.045361
cg00327947	0.36874	0.316238	-0.0525028	hypomethylation	0.002104	0.0079877
cg00329615	0.356117	0.298594	-0.0575235	hypomethylation	0.00129459	0.0067538
cg00329695	0.894439	0.842608	-0.0518311	hypomethylation	0.0184687	0.0255823
cg00331334	0.535454	0.4837	-0.0517539	hypomethylation	0.00651844	0.0134194
cg00333617	0.313526	0.260737	-0.052789	hypomethylation	0.00360285	0.0100182
cg00335124	0.359733	0.307968	-0.0517652	hypomethylation	0.0113097	0.0186377
cg00336022	0.856004	0.793083	-0.0629204	hypomethylation	0.0289139	0.0350811
cg00343839	0.397424	0.463446	0.0660218	hypermethylation	0.0237782	0.0304008
cg00343981	0.549628	0.480714	-0.0689139	hypomethylation	0.00733326	0.0143244
cg00348647	0.788275	0.726054	-0.0622213	hypomethylation	0.0405059	0.0451471
cg00349233	0.465911	0.414651	-0.0512602	hypomethylation	0.0114903	0.0188014
cg00349591	0.645506	0.582206	-0.0633006	hypomethylation	6.62992e-05	0.0027408
cg00354692	0.841237	0.789013	-0.0522232	hypomethylation	0.0016161	0.00726106
cg00359846	0.722309	0.67187	-0.0504382	hypomethylation	0.00582718	0.0127646
cg00363750	0.549034	0.470206	-0.0788283	hypomethylation	0.000406789	0.00451335
cg00367721	0.394492	0.343521	-0.0509709	hypomethylation	0.0203294	0.0272827
cg00368973	0.145267	0.0936655	-0.0516014	hypomethylation	0.000683358	0.00526831
cg00369333	0.559959	0.505992	-0.053967	hypomethylation	0.0236825	0.0303268
cg00373499	0.299976	0.240577	-0.0593995	hypomethylation	0.00670303	0.013633
cg00374263	0.390949	0.326968	-0.063981	hypomethylation	0.0371147	0.0421812
cg00375389	0.894591	0.831944	-0.0626472	hypomethylation	0.000169636	0.00350187
cg00392155	0.820629	0.87285	0.0522214	hypermethylation	0.00217173	0.00810218
cg00393957	0.275845	0.225583	-0.0502624	hypomethylation	0.000492089	0.0047729
cg00394026	0.396474	0.335227	-0.0612466	hypomethylation	0.00652335	0.0134228
cg00399951	0.27206	0.219172	-0.0528884	hypomethylation	0.0446815	0.0488108
cg00408725	0.805068	0.736636	-0.0684321	hypomethylation	0.000636441	0.0051916
cg00413089	0.370432	0.242016	-0.128416	hypomethylation	0.00156318	0.00723579
cg00413849	0.217569	0.148994	-0.0685752	hypomethylation	6.49141e-09	1.81857e-05
cg00418160	0.873535	0.808176	-0.0653586	hypomethylation	0.000226772	0.00366169
cg00419321	0.279693	0.218341	-0.0613518	hypomethylation	0.0331417	0.0387345
cg00423969	0.284441	0.234045	-0.0503964	hypomethylation	0.00184714	0.00766066
cg00439733	0.440192	0.376291	-0.0639009	hypomethylation	0.00219263	0.00813057
cg00442390	0.368668	0.313055	-0.0556128	hypomethylation	0.000759618	0.00545391
cg00457450	0.727482	0.806717	0.079235	hypermethylation	0.00588428	0.0128137
cg00466492	0.865755	0.812467	-0.0532875	hypomethylation	0.00280235	0.00886593
cg00471371	0.418553	0.366112	-0.0524403	hypomethylation	0.00856143	0.015759
cg00486605	0.481431	0.429344	-0.0520869	hypomethylation	0.00557086	0.0124499
cg00492169	0.574433	0.52082	-0.0536132	hypomethylation	0.0155283	0.0227405
cg00492979	0.417271	0.34927	-0.0680014	hypomethylation	0.00814241	0.0152888
cg00512129	0.910707	0.850574	-0.0601328	hypomethylation	0.00186076	0.00766951
cg00519069	0.288349	0.230825	-0.0575238	hypomethylation	0.00088596	0.00579234
cg00523225	0.246265	0.164875	-0.08139	hypomethylation	0.000949503	0.0059642
cg00528572	0.264632	0.209173	-0.0554592	hypomethylation	0.0117466	0.0190411
cg00537196	0.292557	0.240461	-0.0520952	hypomethylation	0.00141891	0.00699835
cg00545916	0.231844	0.163849	-0.0679958	hypomethylation	0.0154226	0.0226567
cg00561395	0.927296	0.86849	-0.0588062	hypomethylation	0.00180444	0.00757892
cg00563932	0.531943	0.471565	-0.0603773	hypomethylation	0.000217849	0.00362199
cg00564790	0.929111	0.861337	-0.0677745	hypomethylation	0.000161516	0.0034541
cg00566209	0.515899	0.586233	0.0703337	hypermethylation	0.00802217	0.0151341
cg00567588	0.830596	0.769263	-0.0613335	hypomethylation	0.00207033	0.00792005
cg00574023	0.924767	0.874524	-0.0502431	hypomethylation	0.0117767	0.0190666
cg00575090	0.634571	0.584007	-0.0505641	hypomethylation	0.0176696	0.0248377
cg00581152	0.42679	0.37001	-0.0567798	hypomethylation	0.00275798	0.00881147
cg00584370	0.624657	0.568151	-0.0565064	hypomethylation	0.00398078	0.0105055
cg00589006	0.364424	0.299188	-0.0652363	hypomethylation	0.000209714	0.00354333
cg00589520	0.360315	0.299651	-0.0606641	hypomethylation	0.00050743	0.00481305
cg00592980	0.352874	0.295255	-0.0576188	hypomethylation	0.00392222	0.0103955
cg00593900	0.181395	0.237887	0.0564921	hypermethylation	0.0121306	0.0194219
cg00597687	0.422373	0.368886	-0.0534871	hypomethylation	0.0193549	0.0264016
cg00601174	0.839729	0.788609	-0.0511194	hypomethylation	0.00321699	0.00952686
cg00601518	0.272321	0.217481	-0.0548399	hypomethylation	0.000375775	0.00436419
cg00602811	0.37294	0.312203	-0.0607378	hypomethylation	0.00109382	0.0062834
cg00607755	0.394826	0.340848	-0.053978	hypomethylation	0.00144556	0.00705527
cg00612017	0.66953	0.599664	-0.0698661	hypomethylation	0.0215887	0.0284884
cg00615271	0.350028	0.292462	-0.0575656	hypomethylation	0.0102475	0.0176061
cg00618711	0.607825	0.557223	-0.0506019	hypomethylation	0.0123461	0.0196576
cg00622128	0.56232	0.492147	-0.0701731	hypomethylation	0.0029826	0.00915698
cg00622815	0.40783	0.353821	-0.0540092	hypomethylation	0.0104636	0.0177791
cg00628277	0.503528	0.447326	-0.0562016	hypomethylation	0.0163464	0.0235568
cg00642460	0.235172	0.312997	0.0778253	hypermethylation	0.00881898	0.0160379
cg00643296	0.370173	0.281723	-0.0884503	hypomethylation	1.46356e-05	0.00146434
cg00646615	0.881676	0.819627	-0.0620483	hypomethylation	0.00166614	0.0073623
cg00649425	0.826097	0.770676	-0.0554209	hypomethylation	0.0165491	0.0237695
cg00658413	0.347125	0.291218	-0.0559061	hypomethylation	0.00391242	0.0103794
cg00674440	0.526757	0.401735	-0.125022	hypomethylation	0.000502371	0.00480981
cg00676294	0.317135	0.255879	-0.0612566	hypomethylation	0.000234452	0.00370395
cg00677287	0.342676	0.286669	-0.0560066	hypomethylation	0.00801984	0.0151341
cg00683085	0.712349	0.633572	-0.0787768	hypomethylation	0.00654257	0.0134347
cg00683266	0.879683	0.827997	-0.051686	hypomethylation	0.00175145	0.0074886
cg00688775	0.270664	0.217259	-0.0534049	hypomethylation	0.00641165	0.0133146
cg00689471	0.245686	0.193653	-0.0520336	hypomethylation	0.000267704	0.00392173
cg00693915	0.862025	0.792702	-0.0693226	hypomethylation	0.00564431	0.0125397
cg00694302	0.660578	0.582592	-0.077986	hypomethylation	0.0412184	0.0457612
cg00695391	0.341958	0.288814	-0.0531436	hypomethylation	0.00139943	0.00695124
cg00698060	0.767049	0.700074	-0.0669752	hypomethylation	0.00428791	0.0109205
cg00699986	0.354373	0.302116	-0.0522571	hypomethylation	0.00133014	0.00685025
cg00701456	0.238015	0.182395	-0.05562	hypomethylation	0.000130237	0.00322402
cg00702815	0.242853	0.190654	-0.0521986	hypomethylation	0.00783136	0.0149198
cg00703898	0.58448	0.516902	-0.0675787	hypomethylation	0.00623226	0.0131871
cg00707127	0.313321	0.247918	-0.0654028	hypomethylation	0.00279777	0.00886146
cg00707688	0.665901	0.604713	-0.061188	hypomethylation	0.00107615	0.00626136
cg00711090	0.280064	0.187106	-0.092958	hypomethylation	3.73357e-05	0.00213461
cg00715696	0.478485	0.410046	-0.0684395	hypomethylation	0.00322872	0.00954644
cg00718261	0.585698	0.514219	-0.0714794	hypomethylation	0.00149985	0.00710656
cg00728566	0.368783	0.314279	-0.0545044	hypomethylation	0.00292029	0.00905335
cg00729370	0.835146	0.774033	-0.0611126	hypomethylation	0.0260119	0.0325323
cg00730096	0.625734	0.568013	-0.0577213	hypomethylation	0.00197517	0.00779356
cg00730373	0.656289	0.603329	-0.05296	hypomethylation	0.0120154	0.0193153
cg00733417	0.309029	0.25688	-0.0521489	hypomethylation	0.00490613	0.0116808
cg00748092	0.568271	0.50989	-0.058381	hypomethylation	0.0071563	0.0141045
cg00749291	0.687166	0.609308	-0.0778585	hypomethylation	0.0388598	0.0437299
cg00764772	0.341281	0.288192	-0.0530895	hypomethylation	0.00175999	0.0074886
cg00767573	0.725647	0.663337	-0.06231	hypomethylation	0.00126565	0.00666267
cg00773142	0.909049	0.85486	-0.0541888	hypomethylation	0.0185966	0.0256832
cg00783877	0.648824	0.584751	-0.0640732	hypomethylation	0.0416112	0.0460584
cg00790693	0.352574	0.292484	-0.0600904	hypomethylation	0.000184648	0.00352963
cg00791851	0.591756	0.475834	-0.115922	hypomethylation	0.0201504	0.0271401
cg00793088	0.456812	0.397255	-0.0595565	hypomethylation	0.012432	0.0197104
cg00798554	0.500579	0.447694	-0.0528848	hypomethylation	0.00116893	0.00640834
cg00810710	0.542685	0.491209	-0.0514768	hypomethylation	0.012894	0.0201858
cg00815399	0.353664	0.253442	-0.100222	hypomethylation	0.0111643	0.0185344
cg00816164	0.235483	0.170024	-0.0654587	hypomethylation	9.28563e-05	0.00284303
cg00825690	0.900003	0.846617	-0.0533865	hypomethylation	0.000466951	0.00467202
cg00830121	0.914683	0.846867	-0.0678168	hypomethylation	0.000457135	0.00463161
cg00835818	0.614611	0.561618	-0.0529923	hypomethylation	0.019414	0.0264392
cg00844202	0.342477	0.291246	-0.0512317	hypomethylation	0.0225015	0.0292928
cg00861497	0.16527	0.11134	-0.05393	hypomethylation	0.00119215	0.00646
cg00864046	0.532033	0.449628	-0.0824054	hypomethylation	0.00772954	0.0148216
cg00879303	0.76487	0.70293	-0.0619395	hypomethylation	0.00716162	0.0141064
cg00886748	0.902755	0.848557	-0.0541981	hypomethylation	0.00193449	0.00774087
cg00890249	0.848728	0.781043	-0.0676853	hypomethylation	0.0010602	0.00622022
cg00893875	0.130467	0.197617	0.06715	hypermethylation	0.01061	0.0179169
cg00901401	0.333695	0.253772	-0.0799225	hypomethylation	0.00235244	0.00837401
cg00905304	0.905204	0.837869	-0.0673345	hypomethylation	0.000364951	0.00435068
cg00917413	0.74709	0.686573	-0.0605169	hypomethylation	0.0352524	0.0405334
cg00917847	0.20218	0.150515	-0.0516659	hypomethylation	0.0350011	0.0402775
cg00925688	0.215619	0.156984	-0.0586352	hypomethylation	0.000443948	0.00458309
cg00926226	0.718851	0.776783	0.0579321	hypermethylation	0.0458224	0.0497854
cg00931187	0.199678	0.149243	-0.0504353	hypomethylation	0.0061549	0.0130976
cg00941414	0.331996	0.266875	-0.0651208	hypomethylation	6.73372e-05	0.0027408
cg00948124	0.707885	0.636505	-0.0713796	hypomethylation	0.00891304	0.0161187
cg00950507	0.926533	0.872556	-0.0539766	hypomethylation	0.00490257	0.0116808
cg00951279	0.373496	0.316942	-0.0565539	hypomethylation	0.00408964	0.0106419
cg00955281	0.725121	0.784953	0.0598323	hypermethylation	0.00654781	0.0134386
cg00964035	0.452079	0.337286	-0.114792	hypomethylation	0.00379863	0.0102768
cg00968336	0.612581	0.561117	-0.051464	hypomethylation	0.0299843	0.0360906
cg00973876	0.451479	0.395075	-0.0564042	hypomethylation	0.00256845	0.00861569
cg00985040	0.679527	0.620616	-0.0589108	hypomethylation	0.00259427	0.00863915
cg00988236	0.476912	0.415786	-0.0611258	hypomethylation	0.0127214	0.0199978
cg00997604	0.520491	0.468564	-0.0519274	hypomethylation	0.0184812	0.0255932
cg01002284	0.220684	0.15256	-0.0681242	hypomethylation	0.00249732	0.00854258
cg01003303	0.879735	0.819262	-0.0604734	hypomethylation	0.0301259	0.0362144
cg01010839	0.718125	0.651643	-0.0664817	hypomethylation	0.00291099	0.00904696
cg01011898	0.331166	0.273724	-0.0574413	hypomethylation	0.00511885	0.011965
cg01014399	0.742576	0.690737	-0.0518387	hypomethylation	0.000178842	0.00351
cg01028526	0.434782	0.364607	-0.0701753	hypomethylation	0.02597	0.0324944
cg01032200	0.288784	0.189915	-0.0988685	hypomethylation	0.0456863	0.0496567
cg01032802	0.768194	0.715975	-0.0522197	hypomethylation	0.00631555	0.0132354
cg01050736	0.800963	0.728569	-0.0723946	hypomethylation	0.00276648	0.00881147
cg01055696	0.766941	0.822773	0.0558319	hypermethylation	0.0224474	0.0292482
cg01071808	0.621337	0.560632	-0.060705	hypomethylation	0.00504592	0.0118678
cg01079860	0.577881	0.510825	-0.0670559	hypomethylation	0.0335721	0.0390826
cg01083050	0.470749	0.416057	-0.0546929	hypomethylation	0.0420603	0.0465096
cg01084048	0.382862	0.323438	-0.0594241	hypomethylation	0.00147237	0.00707585
cg01117623	0.635415	0.580815	-0.0546007	hypomethylation	0.0150601	0.0222996
cg01118321	0.778763	0.723308	-0.0554545	hypomethylation	0.00292463	0.00905845
cg01119903	0.405944	0.35303	-0.0529143	hypomethylation	0.00715154	0.0141045
cg01124132	0.45639	0.555179	0.0987898	hypermethylation	0.022547	0.0293247
cg01129674	0.818971	0.760837	-0.0581344	hypomethylation	0.0178133	0.0249832
cg01129847	0.341231	0.290477	-0.0507534	hypomethylation	0.00553733	0.0124401
cg01131999	0.865858	0.803481	-0.0623774	hypomethylation	0.00335744	0.00973715
cg01137047	0.409095	0.347821	-0.0612737	hypomethylation	0.00385157	0.0103015
cg01144436	0.537002	0.477601	-0.0594005	hypomethylation	0.0261904	0.0327118
cg01147731	0.740635	0.687051	-0.0535842	hypomethylation	0.000829955	0.00563665
cg01149766	0.215988	0.161247	-0.0547408	hypomethylation	0.0071812	0.014118
cg01152408	0.3119	0.254539	-0.0573612	hypomethylation	7.80379e-05	0.00284303
cg01152927	0.778785	0.716257	-0.062528	hypomethylation	0.00476096	0.0115629
cg01156070	0.299723	0.236696	-0.0630264	hypomethylation	0.00632126	0.0132354
cg01157950	0.91558	0.834304	-0.0812761	hypomethylation	0.000272753	0.00394651
cg01176516	0.240606	0.174586	-0.0660196	hypomethylation	0.0199125	0.0268842
cg01184591	0.588892	0.519613	-0.0692795	hypomethylation	0.0023235	0.00836669
cg01199648	0.929596	0.87934	-0.0502556	hypomethylation	0.0156579	0.0228704
cg01202519	0.408554	0.48275	0.074196	hypermethylation	0.0330084	0.0386189
cg01202976	0.883201	0.944875	0.0616748	hypermethylation	0.022656	0.0294255
cg01204709	0.351608	0.413877	0.0622685	hypermethylation	0.0153902	0.0226508
cg01216388	0.71844	0.662329	-0.056111	hypomethylation	0.011554	0.0188573
cg01217923	0.731188	0.667372	-0.0638158	hypomethylation	0.0141456	0.0214284
cg01227572	0.635706	0.584909	-0.0507962	hypomethylation	0.0324382	0.038167
cg01229658	0.360013	0.305534	-0.0544794	hypomethylation	0.00389634	0.0103516
cg01231800	0.803816	0.753655	-0.0501609	hypomethylation	0.0192776	0.0263292
cg01239717	0.410446	0.360366	-0.05008	hypomethylation	0.000515032	0.00481757
cg01268901	0.365296	0.310868	-0.0544274	hypomethylation	0.00204138	0.00788925
cg01271129	0.526255	0.455809	-0.0704459	hypomethylation	0.00111153	0.00629081
cg01275061	0.843346	0.789175	-0.0541709	hypomethylation	0.0205864	0.0275223
cg01275656	0.380453	0.319202	-0.0612514	hypomethylation	0.0149815	0.0222248
cg01280850	0.582081	0.509305	-0.072776	hypomethylation	0.00100372	0.00606074
cg01282906	0.695617	0.636071	-0.0595452	hypomethylation	0.0116698	0.0189579
cg01283976	0.846259	0.780949	-0.0653104	hypomethylation	0.00620994	0.0131647
cg01285237	0.741941	0.687882	-0.0540591	hypomethylation	0.0165021	0.0237202
cg01294862	0.297848	0.241982	-0.0558657	hypomethylation	0.000286544	0.00404409
cg01305291	0.42995	0.373124	-0.0568257	hypomethylation	0.00712088	0.0140685
cg01314555	0.896249	0.840235	-0.0560138	hypomethylation	0.000535314	0.00491006
cg01317037	0.695709	0.632045	-0.0636635	hypomethylation	0.00124262	0.0066083
cg01335710	0.940872	0.887376	-0.053496	hypomethylation	0.000996363	0.00604635
cg01339103	0.894016	0.815752	-0.078264	hypomethylation	8.23416e-05	0.00284303
cg01348922	0.260173	0.197858	-0.0623149	hypomethylation	0.0325845	0.0382551
cg01349063	0.868859	0.817107	-0.0517527	hypomethylation	0.000871443	0.00575111
cg01353265	0.49446	0.400335	-0.0941254	hypomethylation	5.96414e-06	0.000928252
cg01357222	0.408156	0.35463	-0.0535258	hypomethylation	0.00239243	0.00841218
cg01357853	0.484558	0.387649	-0.0969088	hypomethylation	0.0142829	0.0215591
cg01360605	0.342309	0.28582	-0.0564897	hypomethylation	0.00708267	0.0140227
cg01363734	0.382581	0.331721	-0.0508605	hypomethylation	0.0237717	0.0304008
cg01367324	0.38057	0.321431	-0.0591389	hypomethylation	0.00943835	0.0167246
cg01377051	0.324354	0.273458	-0.0508962	hypomethylation	0.00325604	0.00959178
cg01379853	0.931903	0.874684	-0.0572195	hypomethylation	0.0073254	0.0143161
cg01384410	0.43995	0.374376	-0.0655736	hypomethylation	0.00437638	0.01105
cg01396302	0.553072	0.491455	-0.0616176	hypomethylation	0.000813393	0.00559882
cg01410746	0.54315	0.456841	-0.0863088	hypomethylation	0.000701017	0.00532624
cg01411487	0.856322	0.805415	-0.0509072	hypomethylation	0.00286267	0.00896565
cg01412668	0.421092	0.367264	-0.053828	hypomethylation	0.00536681	0.0122586
cg01412970	0.356896	0.435018	0.0781217	hypermethylation	0.0256963	0.0322394
cg01413354	0.2892	0.237869	-0.0513312	hypomethylation	0.0275109	0.0338587
cg01414728	0.480897	0.427325	-0.0535717	hypomethylation	0.00147453	0.00707585
cg01414857	0.673365	0.607473	-0.0658918	hypomethylation	0.0109816	0.0183344
cg01418527	0.803917	0.734461	-0.0694565	hypomethylation	0.0191597	0.0262345
cg01427108	0.782391	0.588493	-0.193898	hypomethylation	0.00262281	0.00866486
cg01435315	0.428085	0.360817	-0.0672673	hypomethylation	0.00406387	0.0106352
cg01436254	0.550872	0.473979	-0.0768928	hypomethylation	0.000374381	0.00436103
cg01442685	0.920089	0.868631	-0.0514584	hypomethylation	0.00055809	0.00498747
cg01449103	0.28988	0.235724	-0.0541561	hypomethylation	0.00161865	0.00726106
cg01462611	0.715564	0.662701	-0.0528626	hypomethylation	0.0181388	0.0252941
cg01465769	0.366225	0.314899	-0.0513258	hypomethylation	0.00349125	0.00986956
cg01477894	0.415684	0.359127	-0.0565572	hypomethylation	0.000765493	0.00545391
cg01486610	0.664625	0.610832	-0.0537928	hypomethylation	0.0182096	0.0253361
cg01487961	0.45931	0.403523	-0.055787	hypomethylation	0.0101038	0.0174512
cg01507522	0.624504	0.574101	-0.0504033	hypomethylation	0.00239374	0.00841218
cg01508988	0.359908	0.287144	-0.0727639	hypomethylation	2.34446e-05	0.00176435
cg01511514	0.884464	0.805418	-0.0790457	hypomethylation	3.73738e-06	0.000747876
cg01517571	0.740258	0.621976	-0.118282	hypomethylation	0.0103049	0.0176261
cg01522320	0.868445	0.806151	-0.062294	hypomethylation	0.000189324	0.00352963
cg01528779	0.307614	0.235898	-0.0717162	hypomethylation	0.000125461	0.00318127
cg01530101	0.267947	0.320265	0.0523176	hypermethylation	0.0183964	0.0255263
cg01530413	0.438739	0.387031	-0.0517079	hypomethylation	0.0236698	0.0303205
cg01533966	0.63107	0.53993	-0.0911397	hypomethylation	0.000170101	0.00350187
cg01538257	0.744675	0.654362	-0.0903124	hypomethylation	5.92607e-05	0.00269949
cg01541570	0.381028	0.326143	-0.0548852	hypomethylation	0.00113611	0.00634025
cg01542719	0.754809	0.704115	-0.0506939	hypomethylation	0.0123753	0.0196706
cg01545863	0.312599	0.258818	-0.0537811	hypomethylation	0.000408884	0.00451722
cg01548680	0.30603	0.253258	-0.0527713	hypomethylation	0.00201638	0.00788862
cg01551258	0.712837	0.661411	-0.051426	hypomethylation	0.00399096	0.0105089
cg01553030	0.873576	0.815538	-0.0580379	hypomethylation	0.000732923	0.0054046
cg01562540	0.527187	0.474431	-0.0527553	hypomethylation	0.00624181	0.0131985
cg01569388	0.432135	0.378017	-0.0541172	hypomethylation	2.63233e-05	0.00178455
cg01579812	0.567428	0.516581	-0.0508476	hypomethylation	0.0230008	0.0297173
cg01584478	0.685698	0.634463	-0.0512348	hypomethylation	0.0191956	0.0262709
cg01584932	0.383085	0.30786	-0.0752242	hypomethylation	0.00162721	0.00726109
cg01587386	0.830281	0.884468	0.054187	hypermethylation	0.0251246	0.0317374
cg01592705	0.649927	0.599594	-0.0503329	hypomethylation	0.0392656	0.0440627
cg01601299	0.434203	0.381981	-0.0522218	hypomethylation	0.00353152	0.00993226
cg01612133	0.796087	0.739395	-0.0566919	hypomethylation	0.00983272	0.0171467
cg01615333	0.453196	0.397494	-0.0557017	hypomethylation	0.019289	0.0263344
cg01622416	0.630524	0.573929	-0.056595	hypomethylation	0.0131345	0.0203914
cg01624173	0.266509	0.205857	-0.0606513	hypomethylation	0.026231	0.032727
cg01625851	0.472206	0.401614	-0.0705917	hypomethylation	0.0372176	0.0422811
cg01640590	0.310971	0.25854	-0.0524308	hypomethylation	0.0116546	0.0189443
cg01646795	0.792676	0.732951	-0.0597257	hypomethylation	0.0197901	0.0267612
cg01649837	0.522873	0.46996	-0.052913	hypomethylation	0.0296426	0.0357839
cg01650618	0.7626	0.704127	-0.0584727	hypomethylation	0.00326862	0.00962379
cg01652514	0.46122	0.399478	-0.0617421	hypomethylation	0.000463252	0.00466807
cg01655349	0.901984	0.84025	-0.061734	hypomethylation	0.00289188	0.00902183
cg01655427	0.297522	0.247069	-0.0504528	hypomethylation	0.000980483	0.00601055
cg01664441	0.646582	0.588283	-0.0582996	hypomethylation	0.015547	0.0227559
cg01675596	0.321523	0.385418	0.0638945	hypermethylation	0.0332464	0.0388083
cg01678833	0.409871	0.357877	-0.0519941	hypomethylation	0.00912007	0.0163572
cg01679206	0.226086	0.173311	-0.0527746	hypomethylation	0.0112799	0.0186179
cg01680988	0.907589	0.829129	-0.0784602	hypomethylation	0.00036348	0.00434239
cg01690942	0.667266	0.617098	-0.0501681	hypomethylation	0.0209279	0.0278063
cg01693519	0.208032	0.154019	-0.054013	hypomethylation	0.00158655	0.00723579
cg01696605	0.790752	0.711264	-0.0794885	hypomethylation	0.00692911	0.0138656
cg01713095	0.870115	0.795615	-0.0744998	hypomethylation	0.005622	0.0125249
cg01715763	0.402628	0.351353	-0.0512754	hypomethylation	0.0174512	0.0246357
cg01719405	0.330624	0.277614	-0.0530103	hypomethylation	0.00972494	0.0170118
cg01722829	0.499344	0.440429	-0.0589154	hypomethylation	0.020296	0.0272707
cg01723892	0.309217	0.255349	-0.0538678	hypomethylation	0.00246487	0.00850412
cg01730785	0.9311	0.878733	-0.0523676	hypomethylation	0.000933602	0.00594212
cg01734951	0.429798	0.373231	-0.0565671	hypomethylation	0.00178694	0.00755306
cg01735712	0.830413	0.772977	-0.0574361	hypomethylation	0.00193601	0.00774087
cg01739960	0.675797	0.608763	-0.0670339	hypomethylation	0.0428485	0.0472041
cg01741606	0.595485	0.528703	-0.0667822	hypomethylation	0.00013839	0.00328623
cg01743873	0.446787	0.388706	-0.0580808	hypomethylation	0.00112273	0.00631594
cg01747862	0.402478	0.343865	-0.0586123	hypomethylation	0.0338204	0.0392329
cg01748347	0.433486	0.380434	-0.0530521	hypomethylation	0.0186335	0.0257027
cg01750221	0.762408	0.701346	-0.0610618	hypomethylation	0.0314333	0.0373407
cg01751047	0.777581	0.714437	-0.0631442	hypomethylation	0.00110403	0.0062834
cg01757942	0.859434	0.795554	-0.0638798	hypomethylation	0.021228	0.028105
cg01760756	0.209102	0.120345	-0.0887561	hypomethylation	0.000264907	0.00392173
cg01761968	0.55681	0.498644	-0.0581664	hypomethylation	0.0181564	0.0253124
cg01766134	0.657946	0.594656	-0.0632893	hypomethylation	0.00855023	0.015759
cg01766941	0.484289	0.429194	-0.0550954	hypomethylation	0.00926005	0.0165183
cg01772980	0.889933	0.839185	-0.0507476	hypomethylation	0.0110726	0.0184312
cg01773927	0.382696	0.309403	-0.0732929	hypomethylation	0.000271122	0.00394651
cg01781179	0.646446	0.592275	-0.0541713	hypomethylation	0.00195071	0.00776418
cg01791778	0.735649	0.797055	0.061406	hypermethylation	0.00600177	0.0129487
cg01792230	0.472651	0.405876	-0.0667749	hypomethylation	0.0050688	0.011888
cg01794156	0.516478	0.601419	0.0849414	hypermethylation	0.00372415	0.0101639
cg01797371	0.189726	0.120917	-0.0688086	hypomethylation	0.00641276	0.0133146
cg01798341	0.827464	0.775445	-0.0520195	hypomethylation	0.00138549	0.00690648
cg01799429	0.770019	0.714683	-0.055336	hypomethylation	0.00785792	0.0149551
cg01799458	0.632029	0.580883	-0.0511462	hypomethylation	0.0325827	0.0382551
cg01800286	0.388829	0.336587	-0.0522424	hypomethylation	0.0196981	0.026672
cg01802713	0.294782	0.242413	-0.0523692	hypomethylation	0.000768681	0.00545391
cg01812644	0.292428	0.242012	-0.0504162	hypomethylation	0.0015492	0.00722862
cg01817364	0.796355	0.86041	0.0640546	hypermethylation	0.00188216	0.00768799
cg01822889	0.217411	0.157441	-0.0599698	hypomethylation	3.42894e-05	0.00206584
cg01823120	0.872596	0.8218	-0.0507961	hypomethylation	0.018436	0.0255559
cg01827070	0.892208	0.963746	0.0715381	hypermethylation	0.0202815	0.0272576
cg01828742	0.361673	0.306808	-0.0548647	hypomethylation	0.00136091	0.00686951
cg01830154	0.340506	0.273939	-0.0665669	hypomethylation	0.00273783	0.00877578
cg01831454	0.294885	0.244531	-0.0503536	hypomethylation	0.00192384	0.00774087
cg01843127	0.569441	0.513101	-0.0563397	hypomethylation	0.0178074	0.0249813
cg01850179	0.333637	0.240991	-0.0926467	hypomethylation	0.000643686	0.0051916
cg01860545	0.821888	0.758634	-0.0632541	hypomethylation	0.00267024	0.008713
cg01863011	0.357606	0.302073	-0.0555329	hypomethylation	0.000748483	0.00544803
cg01873305	0.871587	0.821323	-0.050264	hypomethylation	0.0218836	0.0287759
cg01874309	0.903744	0.853588	-0.0501564	hypomethylation	0.0440637	0.0482393
cg01876103	0.230982	0.179295	-0.0516863	hypomethylation	2.13478e-05	0.0017385
cg01879260	0.335717	0.285243	-0.0504737	hypomethylation	0.000613254	0.00514957
cg01882151	0.717738	0.77507	0.0573322	hypermethylation	0.00184463	0.00766066
cg01884057	0.276956	0.204015	-0.0729404	hypomethylation	0.000298489	0.00410917
cg01885554	0.560912	0.500584	-0.0603279	hypomethylation	0.00282015	0.00890214
cg01895549	0.331136	0.280107	-0.0510293	hypomethylation	0.00392445	0.0103965
cg01898222	0.308555	0.256422	-0.0521333	hypomethylation	0.00177809	0.00753033
cg01898225	0.698565	0.646878	-0.0516875	hypomethylation	0.0395729	0.0443423
cg01904886	0.518272	0.40476	-0.113513	hypomethylation	6.88831e-05	0.0027408
cg01906944	0.52321	0.471738	-0.051472	hypomethylation	0.0274916	0.033847
cg01910579	0.536046	0.475196	-0.0608497	hypomethylation	0.0123617	0.019661
cg01910804	0.576907	0.488571	-0.0883362	hypomethylation	0.000276438	0.00395123
cg01925738	0.573318	0.628647	0.0553283	hypermethylation	0.0348866	0.0401622
cg01928820	0.535782	0.475708	-0.0600742	hypomethylation	0.000545767	0.00494381
cg01930518	0.206572	0.149625	-0.0569468	hypomethylation	0.00147662	0.00707743
cg01936753	0.435539	0.364104	-0.0714351	hypomethylation	0.00370212	0.010149
cg01947751	0.839031	0.778014	-0.0610177	hypomethylation	0.000390871	0.00443454
cg01951617	0.674969	0.61379	-0.0611791	hypomethylation	0.00233623	0.00836845
cg01963002	0.350024	0.290347	-0.0596772	hypomethylation	0.00195531	0.00776418
cg01963633	0.560491	0.495965	-0.0645263	hypomethylation	0.0368142	0.0419247
cg01965462	0.275965	0.224957	-0.0510085	hypomethylation	0.0342058	0.0395573
cg01971034	0.832368	0.781344	-0.0510237	hypomethylation	0.0179034	0.025068
cg01974213	0.870478	0.81916	-0.0513185	hypomethylation	0.0223585	0.0291472
cg01981733	0.846027	0.775303	-0.0707236	hypomethylation	0.00658807	0.0134916
cg01988523	0.874685	0.96377	0.0890851	hypermethylation	0.0115738	0.0188787
cg01988752	0.604039	0.54856	-0.0554796	hypomethylation	0.00338677	0.00976076
cg01989224	0.603209	0.547563	-0.0556467	hypomethylation	0.0208256	0.0277312
cg01993478	0.697693	0.644663	-0.0530292	hypomethylation	0.0123263	0.0196316
cg01994364	0.454521	0.395343	-0.0591776	hypomethylation	0.0105508	0.0178707
cg02000253	0.780479	0.721713	-0.0587656	hypomethylation	0.00201712	0.00788862
cg02004203	0.916773	0.840586	-0.0761871	hypomethylation	0.000126263	0.00318672
cg02011723	0.383385	0.433817	0.0504319	hypermethylation	0.00629424	0.0132177
cg02022739	0.556323	0.608926	0.0526026	hypermethylation	0.0131273	0.020388
cg02030275	0.436982	0.386564	-0.050418	hypomethylation	0.00607995	0.0130238
cg02033206	0.567747	0.512789	-0.0549579	hypomethylation	0.0148279	0.0220783
cg02037857	0.88277	0.827795	-0.0549752	hypomethylation	0.00478309	0.0115736
cg02050298	0.383746	0.331049	-0.0526964	hypomethylation	0.00498458	0.0117804
cg02054572	0.856251	0.715022	-0.141229	hypomethylation	1.39069e-09	7.79204e-06
cg02059927	0.346875	0.295341	-0.0515342	hypomethylation	0.0154717	0.0227037
cg02062175	0.743308	0.687288	-0.0560193	hypomethylation	0.0119774	0.0192787
cg02064106	0.227937	0.176368	-0.051569	hypomethylation	0.00662594	0.0135493
cg02070549	0.303819	0.239352	-0.0644669	hypomethylation	0.00570955	0.0126088
cg02071172	0.754475	0.686794	-0.067681	hypomethylation	0.00697974	0.0139349
cg02075854	0.890464	0.82019	-0.0702736	hypomethylation	0.00315142	0.0094009
cg02076818	0.865993	0.804	-0.0619931	hypomethylation	0.000983412	0.00601534
cg02084029	0.424212	0.371658	-0.0525535	hypomethylation	0.00599447	0.0129471
cg02086877	0.521867	0.390215	-0.131652	hypomethylation	0.0101668	0.0175114
cg02092690	0.780783	0.704287	-0.0764963	hypomethylation	0.0128573	0.0201396
cg02095324	0.883402	0.802785	-0.0806168	hypomethylation	0.0155046	0.0227296
cg02107357	0.669513	0.588794	-0.0807187	hypomethylation	0.0108819	0.0182113
cg02111951	0.334357	0.400815	0.0664577	hypermethylation	0.0341629	0.0395158
cg02122540	0.798418	0.737111	-0.0613067	hypomethylation	0.00335696	0.00973715
cg02137496	0.909139	0.853618	-0.0555209	hypomethylation	0.00258307	0.00863541
cg02143656	0.753833	0.691633	-0.0622005	hypomethylation	0.000518202	0.00483076
cg02147194	0.442097	0.381096	-0.0610009	hypomethylation	0.0117482	0.0190411
cg02150868	0.420489	0.369682	-0.0508074	hypomethylation	0.00424027	0.0108639
cg02151781	0.527783	0.466093	-0.06169	hypomethylation	0.0118544	0.0191469
cg02156870	0.256149	0.307428	0.0512794	hypermethylation	0.00287228	0.0089857
cg02167303	0.677724	0.742502	0.0647782	hypermethylation	0.0117811	0.0190666
cg02174092	0.226081	0.329201	0.10312	hypermethylation	0.0160073	0.0231993
cg02179936	0.536043	0.467055	-0.0689888	hypomethylation	0.0180474	0.0251917
cg02185666	0.328502	0.276183	-0.0523186	hypomethylation	0.000693512	0.00532294
cg02191230	0.635488	0.583004	-0.0524837	hypomethylation	0.0195375	0.0265571
cg02192746	0.397302	0.343606	-0.0536959	hypomethylation	0.0124138	0.0197014
cg02205401	0.374233	0.323642	-0.050591	hypomethylation	0.0256811	0.0322338
cg02206980	0.315182	0.245345	-0.0698365	hypomethylation	0.0134773	0.0207626
cg02213971	0.778249	0.724219	-0.0540306	hypomethylation	0.00395105	0.0104522
cg02227986	0.316389	0.259955	-0.0564339	hypomethylation	0.000446045	0.00458567
cg02229781	0.255058	0.173581	-0.0814774	hypomethylation	0.0263571	0.0328394
cg02242734	0.736147	0.819858	0.0837102	hypermethylation	0.00248999	0.00853037
cg02244309	0.405314	0.352199	-0.053115	hypomethylation	0.00144447	0.00705527
cg02253142	0.329583	0.269214	-0.0603686	hypomethylation	0.00477489	0.0115667
cg02253236	0.859853	0.804835	-0.0550176	hypomethylation	0.00068076	0.00526831
cg02258482	0.763013	0.687195	-0.0758186	hypomethylation	0.0100778	0.0174277
cg02264416	0.846322	0.786496	-0.0598266	hypomethylation	0.00203305	0.00788862
cg02266086	0.505084	0.447639	-0.0574446	hypomethylation	0.0065373	0.0134318
cg02270332	0.562181	0.449161	-0.11302	hypomethylation	0.0221205	0.0289447
cg02272395	0.282214	0.227141	-0.0550728	hypomethylation	0.0117638	0.0190594
cg02285852	0.769239	0.713133	-0.0561055	hypomethylation	0.0401569	0.0448384
cg02286533	0.6172	0.713799	0.0965987	hypermethylation	0.000867955	0.00574162
cg02289287	0.825037	0.882004	0.0569664	hypermethylation	0.0342737	0.0396194
cg02290262	0.395034	0.321524	-0.0735095	hypomethylation	0.00572978	0.0126294
cg02291908	0.910821	0.86046	-0.0503605	hypomethylation	0.00306292	0.00926889
cg02296392	0.677655	0.736716	0.0590613	hypermethylation	0.0100296	0.0173703
cg02298472	0.566382	0.620675	0.0542929	hypermethylation	0.0130658	0.0203561
cg02298703	0.479582	0.420223	-0.0593589	hypomethylation	0.0242238	0.030855
cg02299328	0.359642	0.289677	-0.0699648	hypomethylation	6.29098e-05	0.0027373
cg02302380	0.635383	0.583796	-0.0515871	hypomethylation	0.0164602	0.0236866
cg02303505	0.683986	0.630073	-0.0539131	hypomethylation	0.0343954	0.0397355
cg02306639	0.466024	0.395013	-0.0710103	hypomethylation	0.00610754	0.0130513
cg02308232	0.385912	0.327971	-0.057941	hypomethylation	0.00334985	0.00973508
cg02313495	0.263018	0.170224	-0.0927938	hypomethylation	0.00998335	0.0173179
cg02316506	0.604192	0.551345	-0.0528469	hypomethylation	0.00170992	0.00743265
cg02322911	0.669065	0.612416	-0.0566493	hypomethylation	0.0112293	0.0185705
cg02325811	0.306734	0.245287	-0.0614467	hypomethylation	0.00382094	0.0102778
cg02327335	0.700409	0.643634	-0.0567752	hypomethylation	0.00563825	0.0125397
cg02329670	0.479898	0.429572	-0.0503261	hypomethylation	0.000826507	0.00563372
cg02334987	0.224737	0.163537	-0.0612006	hypomethylation	0.00964197	0.0169407
cg02337992	0.663586	0.613443	-0.0501432	hypomethylation	0.00589321	0.0128232
cg02343008	0.349088	0.286429	-0.0626587	hypomethylation	0.0020181	0.00788862
cg02343628	0.323083	0.260969	-0.0621138	hypomethylation	0.00108474	0.00628318
cg02349146	0.513768	0.451421	-0.0623471	hypomethylation	0.0124888	0.0197613
cg02362841	0.531268	0.479666	-0.0516026	hypomethylation	0.0452667	0.0493107
cg02364831	0.333704	0.264343	-0.0693612	hypomethylation	0.00120966	0.00652329
cg02374430	0.868414	0.817682	-0.0507321	hypomethylation	0.00700477	0.0139391
cg02380135	0.36412	0.307185	-0.0569356	hypomethylation	0.000345528	0.00422707
cg02392555	0.393542	0.338667	-0.0548752	hypomethylation	0.0111173	0.0184837
cg02399831	0.406373	0.35222	-0.054153	hypomethylation	0.0144579	0.0217121
cg02407048	0.427509	0.364459	-0.0630502	hypomethylation	0.00678156	0.0136884
cg02407308	0.512139	0.459758	-0.0523807	hypomethylation	0.0124355	0.0197104
cg02421646	0.459712	0.40874	-0.0509727	hypomethylation	0.00100818	0.00607529
cg02434996	0.772422	0.717405	-0.0550173	hypomethylation	0.000700169	0.00532624
cg02440797	0.227913	0.171407	-0.0565061	hypomethylation	0.00575476	0.0126546
cg02446709	0.757083	0.698671	-0.0584115	hypomethylation	0.0101227	0.0174544
cg02453013	0.537976	0.479284	-0.0586919	hypomethylation	0.0301098	0.0362106
cg02492567	0.828523	0.724935	-0.103588	hypomethylation	0.000322447	0.00414967
cg02493846	0.337137	0.286334	-0.0508035	hypomethylation	0.000321433	0.00414967
cg02497126	0.390163	0.332441	-0.057722	hypomethylation	0.0126346	0.0199238
cg02508770	0.488697	0.43457	-0.0541264	hypomethylation	0.00823018	0.0153848
cg02515900	0.575994	0.516042	-0.0599527	hypomethylation	0.00945418	0.0167408
cg02516288	0.299675	0.223043	-0.0766317	hypomethylation	4.84377e-05	0.00243162
cg02518129	0.772456	0.718875	-0.0535815	hypomethylation	0.0126315	0.0199238
cg02520133	0.890222	0.834554	-0.0556674	hypomethylation	0.00371965	0.0101639
cg02524346	0.835043	0.936162	0.10112	hypermethylation	0.000944983	0.0059547
cg02526350	0.625901	0.570555	-0.0553465	hypomethylation	0.000284186	0.00403242
cg02544752	0.923633	0.86353	-0.0601027	hypomethylation	0.00202844	0.00788862
cg02551604	0.249539	0.191791	-0.0577476	hypomethylation	0.00017864	0.00351
cg02556924	0.587835	0.533218	-0.0546173	hypomethylation	0.00103453	0.00615339
cg02573091	0.463377	0.583367	0.119989	hypermethylation	0.0216366	0.028529
cg02575092	0.280545	0.230277	-0.050268	hypomethylation	0.0147571	0.0220374
cg02578350	0.582528	0.521527	-0.0610007	hypomethylation	0.0141828	0.021473
cg02588591	0.504456	0.453755	-0.0507009	hypomethylation	0.0068503	0.0137719
cg02590484	0.796735	0.74319	-0.0535457	hypomethylation	0.0130413	0.0203339
cg02592403	0.660898	0.606368	-0.0545302	hypomethylation	0.0313098	0.0372856
cg02605776	0.409705	0.348306	-0.0613992	hypomethylation	0.00146212	0.00707585
cg02619205	0.27162	0.219069	-0.052551	hypomethylation	8.56269e-05	0.00284303
cg02624047	0.434675	0.37656	-0.0581148	hypomethylation	0.00126399	0.0066624
cg02627403	0.451725	0.382597	-0.0691281	hypomethylation	0.000393057	0.00443454
cg02636380	0.5163	0.46045	-0.0558502	hypomethylation	0.019003	0.0260455
cg02648943	0.633637	0.685942	0.052305	hypermethylation	0.0333154	0.0388726
cg02655549	0.531351	0.456579	-0.0747722	hypomethylation	0.000386193	0.00441873
cg02656474	0.271111	0.437663	0.166552	hypermethylation	0.00160746	0.00726072
cg02660097	0.358754	0.27258	-0.0861736	hypomethylation	0.000175	0.00350187
cg02669012	0.330002	0.275226	-0.0547752	hypomethylation	9.83291e-05	0.00288861
cg02673986	0.291716	0.228185	-0.0635313	hypomethylation	0.000236552	0.00370395
cg02680903	0.498252	0.441115	-0.0571374	hypomethylation	0.00964056	0.0169407
cg02683668	0.938784	0.884017	-0.0547673	hypomethylation	0.00156981	0.00723579
cg02688549	0.581656	0.515294	-0.0663618	hypomethylation	0.00299281	0.00916276
cg02689785	0.859941	0.792764	-0.0671769	hypomethylation	0.00382341	0.0102795
cg02692938	0.621608	0.548232	-0.0733761	hypomethylation	0.000770172	0.00545547
cg02698668	0.402563	0.35194	-0.0506221	hypomethylation	0.00668662	0.0136217
cg02703494	0.924713	0.867572	-0.0571409	hypomethylation	0.00635624	0.0132723
cg02703627	0.730435	0.679231	-0.0512041	hypomethylation	0.0302588	0.036343
cg02705573	0.382177	0.332171	-0.0500052	hypomethylation	0.0112718	0.0186136
cg02706365	0.339727	0.271032	-0.0686947	hypomethylation	0.015414	0.022652
cg02713706	0.668601	0.726556	0.057955	hypermethylation	0.0320734	0.0378578
cg02716041	0.895799	0.839095	-0.0567044	hypomethylation	0.00979611	0.0171076
cg02719489	0.90458	0.825133	-0.0794466	hypomethylation	0.000509502	0.00481305
cg02719634	0.854365	0.801482	-0.0528835	hypomethylation	0.00316335	0.00941815
cg02722183	0.437746	0.386806	-0.0509397	hypomethylation	0.0254541	0.0320133
cg02722204	0.338618	0.286783	-0.0518349	hypomethylation	0.00246189	0.00849907
cg02723079	0.454091	0.401671	-0.0524198	hypomethylation	0.016748	0.0239569
cg02734000	0.275755	0.220913	-0.0548425	hypomethylation	0.00941224	0.0166941
cg02748479	0.593935	0.528941	-0.064994	hypomethylation	0.0337864	0.0392261
cg02750974	0.289187	0.237804	-0.0513832	hypomethylation	0.00238436	0.00841218
cg02765200	0.5934	0.530949	-0.0624506	hypomethylation	0.00219556	0.00813604
cg02766403	0.537851	0.479886	-0.057965	hypomethylation	0.00850298	0.0157131
cg02766704	0.788653	0.711579	-0.077074	hypomethylation	0.000193731	0.00352963
cg02768760	0.893576	0.841506	-0.05207	hypomethylation	0.0205052	0.0274333
cg02787902	0.813072	0.74687	-0.0662022	hypomethylation	0.00114477	0.00634436
cg02789218	0.90618	0.851909	-0.0542711	hypomethylation	0.0056258	0.0125275
cg02791753	0.239994	0.183905	-0.056089	hypomethylation	0.0102427	0.0176057
cg02793280	0.820826	0.717599	-0.103226	hypomethylation	8.27188e-05	0.00284303
cg02802029	0.483726	0.413668	-0.0700574	hypomethylation	0.0121558	0.0194319
cg02807673	0.159782	0.101321	-0.0584612	hypomethylation	0.00105836	0.00622022
cg02829712	0.287568	0.226785	-0.0607837	hypomethylation	0.0340299	0.039419
cg02832476	0.614582	0.554468	-0.060114	hypomethylation	0.00952612	0.0168216
cg02833580	0.0783512	0.128636	0.0502851	hypermethylation	0.00282832	0.00891694
cg02833950	0.756234	0.698604	-0.05763	hypomethylation	0.0436372	0.0479035
cg02842608	0.945749	0.894386	-0.0513632	hypomethylation	0.000628691	0.00518296
cg02845345	0.528161	0.449086	-0.0790752	hypomethylation	0.00252274	0.00857702
cg02847356	0.328395	0.270511	-0.0578832	hypomethylation	0.00113349	0.00633196
cg02848875	0.556201	0.634712	0.0785111	hypermethylation	0.032101	0.0378737
cg02865165	0.381162	0.32152	-0.0596423	hypomethylation	0.0422093	0.0466334
cg02867811	0.928226	0.850355	-0.0778711	hypomethylation	0.000117072	0.00310756
cg02867991	0.584404	0.533415	-0.0509884	hypomethylation	0.0041929	0.0108162
cg02870819	0.386361	0.333563	-0.0527986	hypomethylation	0.00498341	0.0117804
cg02872426	0.380007	0.309151	-0.0708568	hypomethylation	0.0143626	0.0216269
cg02881503	0.257999	0.1994	-0.058599	hypomethylation	0.00320432	0.00950441
cg02884928	0.607698	0.547743	-0.0599543	hypomethylation	0.0176599	0.0248344
cg02888441	0.150891	0.100789	-0.0501018	hypomethylation	0.0165738	0.0237964
cg02889828	0.833164	0.757143	-0.0760208	hypomethylation	9.23779e-06	0.00120371
cg02896808	0.811015	0.760708	-0.050307	hypomethylation	0.00353293	0.00993226
cg02897667	0.234376	0.170364	-0.0640122	hypomethylation	0.00769877	0.0147879
cg02898825	0.735794	0.680324	-0.0554699	hypomethylation	0.0229554	0.0296767
cg02909158	0.78882	0.733559	-0.0552616	hypomethylation	0.0178567	0.0250127
cg02913402	0.697441	0.608851	-0.0885899	hypomethylation	2.87286e-05	0.00185806
cg02921624	0.329292	0.256742	-0.0725509	hypomethylation	2.2181e-06	0.00057795
cg02928184	0.609616	0.557767	-0.0518492	hypomethylation	0.0441343	0.0482883
cg02938422	0.932883	0.881897	-0.0509854	hypomethylation	0.000453291	0.00463058
cg02945587	0.330099	0.279477	-0.0506219	hypomethylation	0.00960736	0.0169064
cg02947456	0.931261	0.865871	-0.0653899	hypomethylation	0.000503043	0.00480981
cg02949258	0.93818	0.878966	-0.0592135	hypomethylation	0.00452294	0.0112581
cg02955504	0.824483	0.769296	-0.0551879	hypomethylation	0.0251358	0.0317377
cg02956042	0.844757	0.767506	-0.077251	hypomethylation	0.000290241	0.00406045
cg02961012	0.755884	0.705608	-0.0502763	hypomethylation	0.000669322	0.005236
cg02962508	0.28794	0.236801	-0.0511396	hypomethylation	0.0142101	0.0214955
cg02964065	0.660093	0.727517	0.067424	hypermethylation	0.0287817	0.0349585
cg02974204	0.620743	0.56443	-0.0563129	hypomethylation	0.0176629	0.0248344
cg02986404	0.349295	0.294342	-0.054953	hypomethylation	0.00511312	0.0119619
cg02998240	0.722852	0.672392	-0.0504599	hypomethylation	0.0427676	0.0471395
cg03003668	0.660729	0.589455	-0.071274	hypomethylation	0.0222923	0.0290948
cg03003919	0.528506	0.478097	-0.0504095	hypomethylation	0.0367147	0.0418284
cg03015758	0.625488	0.572039	-0.0534493	hypomethylation	0.003576	0.00999318
cg03016083	0.329091	0.278156	-0.0509343	hypomethylation	0.00839977	0.0155841
cg03022211	0.876256	0.819279	-0.0569772	hypomethylation	0.0208327	0.0277324
cg03022395	0.90028	0.810574	-0.0897068	hypomethylation	0.0346049	0.0399156
cg03023465	0.341463	0.279669	-0.0617931	hypomethylation	0.0323353	0.0380699
cg03034070	0.487483	0.416822	-0.0706606	hypomethylation	0.00527128	0.0121844
cg03039990	0.343284	0.27811	-0.0651742	hypomethylation	0.00025083	0.00384918
cg03042971	0.41303	0.355627	-0.0574024	hypomethylation	0.00100381	0.00606074
cg03043157	0.237715	0.16596	-0.0717549	hypomethylation	6.07778e-05	0.0027373
cg03043822	0.667908	0.731258	0.0633491	hypermethylation	0.0237145	0.030357
cg03064754	0.936256	0.885935	-0.0503207	hypomethylation	0.0154763	0.0227037
cg03078006	0.650487	0.713755	0.0632677	hypermethylation	0.010816	0.0181444
cg03078486	0.598091	0.656088	0.0579968	hypermethylation	0.0430587	0.0473612
cg03082779	0.47147	0.413789	-0.0576803	hypomethylation	0.00141688	0.0069945
cg03083251	0.445596	0.390392	-0.0552048	hypomethylation	0.0011002	0.0062834
cg03087600	0.843431	0.772649	-0.0707811	hypomethylation	0.000161232	0.0034541
cg03088446	0.790504	0.734341	-0.0561635	hypomethylation	0.00265029	0.00870554
cg03089686	0.636791	0.577693	-0.059098	hypomethylation	0.0399382	0.0446566
cg03090301	0.457356	0.402736	-0.0546193	hypomethylation	0.00225206	0.00822574
cg03104937	0.447785	0.395874	-0.051911	hypomethylation	0.026458	0.0329359
cg03105319	0.909035	0.843172	-0.0658634	hypomethylation	0.00172935	0.0074629
cg03111858	0.864002	0.803808	-0.0601938	hypomethylation	0.0025533	0.00861569
cg03119009	0.491045	0.439197	-0.051848	hypomethylation	0.019698	0.026672
cg03123759	0.845517	0.783909	-0.0616082	hypomethylation	0.0284725	0.034726
cg03126904	0.30822	0.239346	-0.0688735	hypomethylation	0.00706842	0.0140092
cg03126986	0.472069	0.419419	-0.0526504	hypomethylation	0.00684612	0.0137684
cg03131366	0.308361	0.251408	-0.0569528	hypomethylation	0.000178009	0.00351
cg03131752	0.870427	0.820029	-0.0503974	hypomethylation	0.0154502	0.0226846
cg03133378	0.70913	0.786104	0.0769739	hypermethylation	0.0359556	0.0412151
cg03140725	0.718369	0.665421	-0.0529478	hypomethylation	0.0109294	0.0182744
cg03141074	0.819315	0.763859	-0.055456	hypomethylation	0.0104503	0.0177791
cg03142697	0.269917	0.203427	-0.0664901	hypomethylation	0.0195156	0.0265464
cg03147592	0.601909	0.691139	0.0892291	hypermethylation	0.0128702	0.0201542
cg03147852	0.787899	0.70917	-0.0787296	hypomethylation	0.0014542	0.00707585
cg03161803	0.125982	0.183613	0.0576306	hypermethylation	0.00580558	0.0127314
cg03163184	0.323008	0.267934	-0.0550745	hypomethylation	0.0167656	0.0239734
cg03163337	0.934678	0.876839	-0.0578387	hypomethylation	0.000713429	0.00533002
cg03165014	0.17975	0.245852	0.0661022	hypermethylation	0.00698812	0.0139389
cg03165098	0.394864	0.32921	-0.065654	hypomethylation	0.00418573	0.0108027
cg03167320	0.904891	0.822782	-0.0821088	hypomethylation	1.33703e-05	0.00139956
cg03175870	0.837517	0.771947	-0.0655698	hypomethylation	0.00162769	0.00726109
cg03176520	0.486828	0.431959	-0.0548683	hypomethylation	0.0206391	0.0275729
cg03189821	0.677538	0.728557	0.051019	hypermethylation	0.0130682	0.0203561
cg03202564	0.493117	0.431072	-0.0620454	hypomethylation	0.00984461	0.0171515
cg03203197	0.540887	0.617027	0.0761399	hypermethylation	0.0129733	0.0202533
cg03207151	0.463352	0.388972	-0.0743796	hypomethylation	0.00437895	0.01105
cg03221652	0.393764	0.339435	-0.054329	hypomethylation	0.0416937	0.0461314
cg03237261	0.901592	0.850762	-0.05083	hypomethylation	0.00528392	0.0121935
cg03237316	0.500419	0.432389	-0.0680301	hypomethylation	0.000659133	0.00520892
cg03237393	0.585346	0.517855	-0.0674915	hypomethylation	0.0325563	0.0382417
cg03258749	0.87029	0.809609	-0.0606805	hypomethylation	0.00846295	0.0156598
cg03264751	0.272636	0.202651	-0.0699857	hypomethylation	0.000193495	0.00352963
cg03271533	0.696967	0.646089	-0.0508778	hypomethylation	0.00598202	0.012931
cg03289224	0.897038	0.843303	-0.0537354	hypomethylation	0.000910914	0.00585976
cg03292921	0.768819	0.715972	-0.0528471	hypomethylation	0.00857387	0.0157634
cg03298096	0.853216	0.8028	-0.050417	hypomethylation	0.00431648	0.0109584
cg03303774	0.374802	0.297666	-0.077136	hypomethylation	0.0014657	0.00707585
cg03310027	0.795467	0.854618	0.0591502	hypermethylation	3.3344e-05	0.00203072
cg03310480	0.400293	0.343575	-0.0567174	hypomethylation	3.98996e-05	0.00214959
cg03318469	0.340664	0.28376	-0.0569041	hypomethylation	0.00220029	0.00813746
cg03319082	0.566376	0.466384	-0.0999914	hypomethylation	0.00169015	0.0073926
cg03320087	0.368102	0.317603	-0.0504989	hypomethylation	0.0114431	0.0187582
cg03320144	0.818463	0.766972	-0.0514915	hypomethylation	0.0409407	0.0455395
cg03324695	0.257253	0.198885	-0.058368	hypomethylation	0.02313	0.0298336
cg03325619	0.917607	0.86494	-0.0526673	hypomethylation	0.0111831	0.0185491
cg03325664	0.270018	0.200629	-0.0693892	hypomethylation	0.000552609	0.00496197
cg03328727	0.322299	0.233521	-0.088778	hypomethylation	0.00792441	0.0150357
cg03330181	0.223129	0.165515	-0.0576146	hypomethylation	0.0167012	0.0239144
cg03331080	0.140835	0.089914	-0.0509209	hypomethylation	0.0326849	0.0383525
cg03334052	0.733934	0.659854	-0.0740804	hypomethylation	0.000295588	0.00410838
cg03338950	0.266716	0.18079	-0.0859252	hypomethylation	0.00548146	0.0124041
cg03340044	0.465982	0.415135	-0.050847	hypomethylation	0.0116269	0.0189157
cg03344985	0.36316	0.311718	-0.0514413	hypomethylation	0.0271708	0.0335835
cg03350138	0.450068	0.374227	-0.0758412	hypomethylation	0.0136824	0.0209691
cg03353394	0.525705	0.451065	-0.0746401	hypomethylation	0.000621718	0.00518296
cg03355316	0.779416	0.721867	-0.0575489	hypomethylation	0.00955854	0.0168523
cg03358378	0.862189	0.811929	-0.0502592	hypomethylation	0.0218453	0.0287592
cg03368481	0.85666	0.792631	-0.064029	hypomethylation	0.00341735	0.00979335
cg03369084	0.327009	0.264621	-0.0623881	hypomethylation	0.0360793	0.041323
cg03369398	0.675758	0.607651	-0.068106	hypomethylation	0.000863162	0.00573359
cg03375002	0.463605	0.41181	-0.0517952	hypomethylation	0.00622936	0.0131871
cg03386751	0.240861	0.189797	-0.0510644	hypomethylation	0.00031416	0.00414967
cg03389538	0.373811	0.322825	-0.0509855	hypomethylation	0.00271594	0.00877578
cg03391464	0.155631	0.0950715	-0.0605596	hypomethylation	0.000437511	0.00457327
cg03392386	0.723449	0.790286	0.0668372	hypermethylation	0.0135888	0.0208769
cg03393340	0.310345	0.254963	-0.0553825	hypomethylation	0.000584414	0.00505967
cg03394318	0.605982	0.546408	-0.0595742	hypomethylation	0.00794455	0.0150485
cg03395546	0.390743	0.330584	-0.0601588	hypomethylation	9.99016e-05	0.00288861
cg03400783	0.600016	0.539885	-0.0601305	hypomethylation	0.0183079	0.0254413
cg03409548	0.640344	0.554833	-0.0855109	hypomethylation	0.000196401	0.00352963
cg03411401	0.904584	0.852868	-0.0517155	hypomethylation	0.0197543	0.0267352
cg03429763	0.373084	0.322937	-0.0501477	hypomethylation	0.00821562	0.0153697
cg03436546	0.833284	0.764548	-0.0687362	hypomethylation	0.00679074	0.0136988
cg03438417	0.348544	0.295875	-0.0526686	hypomethylation	0.0276235	0.0339715
cg03458099	0.797921	0.747285	-0.0506355	hypomethylation	0.024973	0.0315866
cg03463411	0.426771	0.367347	-0.0594241	hypomethylation	0.0397807	0.0445243
cg03464017	0.800904	0.692638	-0.108266	hypomethylation	0.000304524	0.0041428
cg03470837	0.592107	0.531984	-0.060123	hypomethylation	0.00888181	0.0161028
cg03472888	0.685728	0.613108	-0.0726196	hypomethylation	0.0227344	0.0294726
cg03473127	0.603351	0.541032	-0.0623188	hypomethylation	0.0320678	0.0378578
cg03477336	0.674981	0.623743	-0.0512378	hypomethylation	0.00552718	0.0124389
cg03478379	0.615823	0.541883	-0.0739401	hypomethylation	0.000368164	0.00435243
cg03483707	0.202023	0.144937	-0.0570857	hypomethylation	0.0115719	0.0188787
cg03483727	0.543583	0.476475	-0.0671084	hypomethylation	0.0308951	0.0369725
cg03484476	0.242247	0.190185	-0.0520612	hypomethylation	0.0012212	0.00656028
cg03492101	0.327249	0.272813	-0.0544368	hypomethylation	0.0041973	0.0108226
cg03495944	0.80672	0.864152	0.0574323	hypermethylation	0.00857794	0.0157634
cg03497059	0.326409	0.268627	-0.0577822	hypomethylation	0.00182459	0.00762356
cg03517160	0.638681	0.573509	-0.0651727	hypomethylation	0.00546614	0.0123995
cg03521982	0.767313	0.683068	-0.0842449	hypomethylation	0.00239435	0.00841218
cg03534662	0.398423	0.345956	-0.0524674	hypomethylation	0.00259152	0.00863915
cg03550951	0.582477	0.496702	-0.0857752	hypomethylation	0.00445978	0.0111854
cg03553692	0.415808	0.35919	-0.0566189	hypomethylation	0.0146024	0.0218709
cg03558769	0.72197	0.787233	0.0652632	hypermethylation	0.0122117	0.0194991
cg03570948	0.827724	0.772499	-0.0552254	hypomethylation	0.00320416	0.00950441
cg03581189	0.90243	0.841295	-0.0611355	hypomethylation	0.0397882	0.0445243
cg03590031	0.800733	0.74114	-0.0595929	hypomethylation	0.00265975	0.00870821
cg03627196	0.461566	0.405756	-0.0558107	hypomethylation	0.0142535	0.0215379
cg03629335	0.796265	0.741321	-0.0549439	hypomethylation	0.0294503	0.0355932
cg03629497	0.899051	0.847148	-0.0519024	hypomethylation	0.00519402	0.0120756
cg03629516	0.83098	0.776336	-0.0546433	hypomethylation	0.00272759	0.00877578
cg03635702	0.41744	0.290829	-0.126611	hypomethylation	0.00614763	0.0130921
cg03641585	0.609933	0.489555	-0.120378	hypomethylation	0.0109645	0.0183197
cg03644971	0.896625	0.83698	-0.0596449	hypomethylation	0.00183963	0.00765216
cg03645661	0.360545	0.269402	-0.0911431	hypomethylation	0.0321653	0.0379336
cg03648020	0.4093	0.328859	-0.0804411	hypomethylation	0.0070859	0.0140241
cg03650179	0.900513	0.974706	0.0741927	hypermethylation	0.0154107	0.022652
cg03655684	0.692637	0.640276	-0.0523603	hypomethylation	0.0206285	0.0275654
cg03659281	0.253773	0.196779	-0.0569941	hypomethylation	0.0128988	0.0201874
cg03663538	0.946355	0.871626	-0.0747294	hypomethylation	1.84935e-05	0.00164474
cg03665818	0.832007	0.751111	-0.0808955	hypomethylation	0.00271865	0.00877578
cg03668240	0.652414	0.598127	-0.0542865	hypomethylation	0.00043648	0.00457121
cg03671360	0.815643	0.75033	-0.0653129	hypomethylation	0.0171724	0.0244019
cg03675845	0.300437	0.242163	-0.0582735	hypomethylation	0.0122454	0.0195361
cg03676918	0.837802	0.77743	-0.0603723	hypomethylation	0.00399123	0.0105089
cg03677021	0.386636	0.335034	-0.0516019	hypomethylation	0.0126231	0.0199188
cg03678274	0.394472	0.339876	-0.0545968	hypomethylation	0.00659055	0.0134917
cg03680517	0.580142	0.493492	-0.0866504	hypomethylation	0.0063932	0.0133015
cg03687650	0.783219	0.721163	-0.0620559	hypomethylation	0.00595364	0.0128846
cg03688400	0.709867	0.657182	-0.0526845	hypomethylation	0.00594353	0.0128727
cg03705621	0.48659	0.407623	-0.078967	hypomethylation	0.00611806	0.0130638
cg03706977	0.844292	0.789054	-0.0552383	hypomethylation	0.000315282	0.00414967
cg03718013	0.453663	0.397968	-0.0556954	hypomethylation	0.0138628	0.0211644
cg03720545	0.572841	0.520703	-0.0521386	hypomethylation	0.017507	0.024683
cg03736781	0.422471	0.367732	-0.0547387	hypomethylation	0.0310693	0.0370938
cg03737522	0.766217	0.709136	-0.0570809	hypomethylation	0.00291608	0.00904696
cg03740217	0.73812	0.683991	-0.0541288	hypomethylation	0.00158166	0.00723579
cg03746834	0.378646	0.302573	-0.0760734	hypomethylation	5.72368e-05	0.00265039
cg03751365	0.889896	0.828832	-0.0610645	hypomethylation	0.000432823	0.00456878
cg03754708	0.735273	0.650283	-0.0849908	hypomethylation	6.6507e-06	0.00097903
cg03754825	0.41469	0.364429	-0.0502612	hypomethylation	0.0189493	0.0260037
cg03759229	0.505793	0.564688	0.0588947	hypermethylation	0.00899933	0.0162028
cg03777697	0.784209	0.72532	-0.0588889	hypomethylation	0.0330469	0.0386559
cg03792936	0.4824	0.410711	-0.0716887	hypomethylation	0.0030643	0.00926889
cg03794801	0.256362	0.203243	-0.0531193	hypomethylation	0.00127372	0.00668228
cg03798743	0.210273	0.147191	-0.0630812	hypomethylation	0.00276502	0.00881147
cg03838769	0.784583	0.715827	-0.0687552	hypomethylation	0.0084377	0.0156335
cg03857198	0.427951	0.372824	-0.055127	hypomethylation	0.00328865	0.00963719
cg03857732	0.85068	0.789001	-0.0616792	hypomethylation	0.0113851	0.0186906
cg03860562	0.253233	0.202724	-0.0505084	hypomethylation	0.00188804	0.00768799
cg03870816	0.823408	0.758036	-0.065372	hypomethylation	0.000975554	0.00599345
cg03871034	0.679522	0.598247	-0.0812748	hypomethylation	0.00891518	0.0161187
cg03871489	0.759497	0.699905	-0.0595916	hypomethylation	0.00969377	0.0169977
cg03881867	0.734656	0.66023	-0.0744263	hypomethylation	0.000115576	0.00310756
cg03887438	0.55875	0.492742	-0.0660074	hypomethylation	0.026637	0.0331088
cg03887787	0.304363	0.229008	-0.0753553	hypomethylation	0.00256947	0.00861569
cg03890691	0.365148	0.435401	0.0702537	hypermethylation	0.0119337	0.019236
cg03897407	0.853031	0.791707	-0.0613234	hypomethylation	0.0333306	0.0388822
cg03898448	0.757685	0.70142	-0.0562644	hypomethylation	0.000625485	0.00518296
cg03906071	0.535795	0.482421	-0.0533744	hypomethylation	0.0221191	0.0289447
cg03906115	0.262137	0.211471	-0.0506664	hypomethylation	0.00323176	0.00955041
cg03907575	0.415887	0.361486	-0.0544011	hypomethylation	0.000598305	0.00508696
cg03918304	0.251765	0.191071	-0.0606933	hypomethylation	0.037101	0.0421768
cg03920024	0.616828	0.565349	-0.0514793	hypomethylation	0.00234389	0.00836845
cg03924136	0.656908	0.602323	-0.0545848	hypomethylation	0.00483927	0.0116238
cg03938978	0.460629	0.352837	-0.107792	hypomethylation	0.0246964	0.0313276
cg03948902	0.913907	0.835478	-0.0784289	hypomethylation	0.00195181	0.00776418
cg03950225	0.448901	0.396168	-0.0527328	hypomethylation	0.00360098	0.0100182
cg03961112	0.417018	0.365272	-0.0517454	hypomethylation	0.0165212	0.0237355
cg03967798	0.31866	0.263444	-0.0552154	hypomethylation	0.00195664	0.00776418
cg03970900	0.640501	0.585362	-0.0551393	hypomethylation	0.0209496	0.0278224
cg03971249	0.355121	0.303049	-0.0520716	hypomethylation	0.00534932	0.0122586
cg03976151	0.892851	0.839298	-0.0535535	hypomethylation	0.00076138	0.00545391
cg03980231	0.579559	0.515636	-0.0639235	hypomethylation	0.00658151	0.013488
cg03982284	0.806402	0.751067	-0.0553349	hypomethylation	0.0192572	0.0263166
cg03983597	0.843284	0.789699	-0.0535848	hypomethylation	0.0393632	0.0441457
cg03995933	0.605154	0.551975	-0.0531794	hypomethylation	0.000991908	0.00603438
cg04006446	0.866065	0.804977	-0.0610878	hypomethylation	0.00316479	0.00941815
cg04015777	0.293849	0.238048	-0.0558005	hypomethylation	0.00193104	0.00774087
cg04017413	0.390997	0.29335	-0.0976475	hypomethylation	6.4954e-07	0.000259955
cg04023140	0.365137	0.31209	-0.0530468	hypomethylation	0.0189771	0.0260227
cg04038455	0.753821	0.825754	0.0719328	hypermethylation	0.00342338	0.00979335
cg04038932	0.328522	0.244009	-0.084513	hypomethylation	0.000144911	0.0033276
cg04040828	0.22145	0.154935	-0.0665151	hypomethylation	0.000206746	0.00353782
cg04043538	0.693814	0.632849	-0.0609656	hypomethylation	0.0389413	0.0437952
cg04045133	0.409671	0.357614	-0.0520567	hypomethylation	0.0187778	0.0258442
cg04048392	0.273684	0.198161	-0.0755227	hypomethylation	0.00790678	0.0150226
cg04055157	0.332025	0.28145	-0.0505757	hypomethylation	0.00353638	0.0099352
cg04073204	0.873544	0.818379	-0.0551646	hypomethylation	0.00643835	0.0133509
cg04075781	0.316747	0.237302	-0.0794454	hypomethylation	0.00135666	0.00685427
cg04075986	0.261558	0.202936	-0.0586217	hypomethylation	0.0384199	0.0433394
cg04076766	0.202305	0.266329	0.0640247	hypermethylation	0.0184609	0.0255778
cg04084348	0.249766	0.196969	-0.0527969	hypomethylation	0.000852397	0.0057129
cg04090347	0.665886	0.594145	-0.0717405	hypomethylation	0.0325409	0.0382316
cg04091325	0.709989	0.761779	0.05179	hypermethylation	0.00534532	0.0122563
cg04100733	0.52915	0.598766	0.0696155	hypermethylation	0.00601193	0.0129607
cg04101804	0.860517	0.790537	-0.0699801	hypomethylation	0.00351261	0.00990447
cg04103251	0.644783	0.573268	-0.071515	hypomethylation	0.0118588	0.0191483
cg04105270	0.436276	0.378189	-0.0580861	hypomethylation	0.0109899	0.0183426
cg04109663	0.749044	0.696698	-0.0523458	hypomethylation	0.0105472	0.0178707
cg04111029	0.850362	0.79594	-0.0544212	hypomethylation	0.0218741	0.02877
cg04112704	0.774516	0.713201	-0.0613148	hypomethylation	0.0127045	0.0199974
cg04118080	0.395601	0.329394	-0.066207	hypomethylation	8.67161e-05	0.00284303
cg04119852	0.783115	0.732315	-0.0507993	hypomethylation	0.00188782	0.00768799
cg04127907	0.358117	0.298725	-0.0593928	hypomethylation	0.0412202	0.0457612
cg04135377	0.5068	0.42264	-0.0841597	hypomethylation	0.00259473	0.00863915
cg04138881	0.580699	0.523744	-0.056955	hypomethylation	0.00285863	0.00896398
cg04140633	0.935027	0.88167	-0.0533566	hypomethylation	0.017646	0.0248343
cg04143909	0.697173	0.780427	0.0832532	hypermethylation	0.00710474	0.0140539
cg04146883	0.875502	0.799768	-0.0757342	hypomethylation	0.0016887	0.00739201
cg04149317	0.853395	0.800081	-0.0533131	hypomethylation	0.000945866	0.0059547
cg04157979	0.760412	0.70448	-0.0559321	hypomethylation	0.00241843	0.00843438
cg04160749	0.7736	0.853404	0.0798039	hypermethylation	0.0171515	0.0243908
cg04161328	0.283151	0.227055	-0.0560968	hypomethylation	0.00147424	0.00707585
cg04165656	0.372804	0.289221	-0.083583	hypomethylation	0.00445067	0.0111675
cg04165845	0.935226	0.882611	-0.0526152	hypomethylation	0.0275257	0.0338662
cg04175111	0.456915	0.39942	-0.0574952	hypomethylation	0.0168562	0.024071
cg04188705	0.650415	0.593894	-0.0565208	hypomethylation	0.00281949	0.00890214
cg04195852	0.429393	0.375383	-0.05401	hypomethylation	0.004118	0.0106919
cg04198392	0.599693	0.548215	-0.0514774	hypomethylation	0.0206633	0.0275921
cg04198545	0.599794	0.548388	-0.0514059	hypomethylation	0.00779001	0.0148714
cg04202047	0.349393	0.299375	-0.0500173	hypomethylation	0.0129567	0.0202348
cg04204897	0.8384	0.780326	-0.0580739	hypomethylation	0.000807239	0.00557701
cg04206021	0.240366	0.181654	-0.0587116	hypomethylation	0.000125322	0.00318127
cg04215511	0.734551	0.640965	-0.0935862	hypomethylation	0.0106744	0.0179876
cg04222924	0.808311	0.749257	-0.0590535	hypomethylation	0.00856697	0.015759
cg04235280	0.349686	0.289716	-0.0599705	hypomethylation	0.000913493	0.0058677
cg04237749	0.94992	0.897295	-0.0526249	hypomethylation	0.00042504	0.00454485
cg04251230	0.873573	0.814427	-0.059146	hypomethylation	0.0242247	0.030855
cg04258514	0.641886	0.556354	-0.0855325	hypomethylation	0.00288244	0.00900239
cg04264726	0.301492	0.218449	-0.0830427	hypomethylation	0.00327825	0.00963059
cg04267152	0.329528	0.252856	-0.0766721	hypomethylation	0.00231311	0.00834536
cg04268624	0.779531	0.833076	0.0535459	hypermethylation	0.0412291	0.045762
cg04272368	0.287409	0.237401	-0.050008	hypomethylation	0.00334246	0.00971864
cg04288063	0.356471	0.299764	-0.0567072	hypomethylation	0.023008	0.0297173
cg04292104	0.530298	0.468328	-0.0619701	hypomethylation	0.00762056	0.0147032
cg04300553	0.805337	0.669354	-0.135983	hypomethylation	2.28896e-06	0.00057795
cg04301614	0.259702	0.194077	-0.0656252	hypomethylation	3.5125e-06	0.000747876
cg04302628	0.804777	0.75326	-0.0515177	hypomethylation	0.0428991	0.0472134
cg04308589	0.919417	0.868539	-0.0508779	hypomethylation	0.00151247	0.00711534
cg04308838	0.735529	0.66854	-0.0669893	hypomethylation	0.0010932	0.0062834
cg04314575	0.675446	0.622801	-0.052645	hypomethylation	0.00201449	0.00788862
cg04316909	0.257611	0.198182	-0.0594289	hypomethylation	0.0231094	0.029814
cg04320315	0.61382	0.558364	-0.055456	hypomethylation	0.0177405	0.0248935
cg04321714	0.357309	0.304637	-0.0526715	hypomethylation	0.00109807	0.0062834
cg04328001	0.777304	0.716444	-0.0608593	hypomethylation	0.0437219	0.047967
cg04331802	0.868257	0.81654	-0.0517179	hypomethylation	0.0011442	0.00634436
cg04342484	0.639136	0.573741	-0.0653942	hypomethylation	0.0102899	0.0176261
cg04348643	0.69489	0.608259	-0.0866312	hypomethylation	1.36464e-05	0.00139956
cg04360546	0.575962	0.519867	-0.0560944	hypomethylation	0.000893297	0.00581993
cg04364764	0.780373	0.707814	-0.0725587	hypomethylation	0.0019698	0.00778549
cg04365308	0.608546	0.53517	-0.0733762	hypomethylation	0.00825101	0.0153999
cg04369416	0.391647	0.329902	-0.0617451	hypomethylation	0.00295925	0.00911528
cg04376312	0.420817	0.358888	-0.0619286	hypomethylation	0.00605865	0.0129985
cg04383836	0.660434	0.606499	-0.0539352	hypomethylation	0.00679195	0.0136988
cg04385438	0.3857	0.332697	-0.0530032	hypomethylation	0.00158701	0.00723579
cg04386156	0.624838	0.55706	-0.0677772	hypomethylation	0.0262187	0.032727
cg04390575	0.698531	0.647605	-0.0509257	hypomethylation	0.00208125	0.00793823
cg04390928	0.40029	0.342723	-0.0575662	hypomethylation	0.00464205	0.0114176
cg04393709	0.528217	0.455967	-0.0722503	hypomethylation	0.00209565	0.00797686
cg04394341	0.7622	0.703291	-0.0589089	hypomethylation	0.000962487	0.00598078
cg04395593	0.31534	0.261166	-0.0541744	hypomethylation	0.000187827	0.00352963
cg04414026	0.671725	0.604528	-0.0671966	hypomethylation	0.00242674	0.00844856
cg04414766	0.630599	0.533513	-0.0970861	hypomethylation	0.00578386	0.0126937
cg04421392	0.831244	0.771448	-0.0597956	hypomethylation	0.0176413	0.0248343
cg04436207	0.247025	0.185823	-0.0612019	hypomethylation	0.0322105	0.0379548
cg04440119	0.89885	0.827146	-0.0717035	hypomethylation	0.00497006	0.0117721
cg04440456	0.287482	0.228613	-0.0588688	hypomethylation	0.000858518	0.00573359
cg04447128	0.644627	0.590007	-0.0546198	hypomethylation	0.00107591	0.00626136
cg04461867	0.709471	0.651668	-0.0578033	hypomethylation	0.0275136	0.0338587
cg04465087	0.653864	0.602811	-0.0510526	hypomethylation	0.00548405	0.012405
cg04474988	0.340359	0.391981	0.0516218	hypermethylation	0.00336447	0.00973715
cg04475868	0.767171	0.707187	-0.0599842	hypomethylation	0.00163858	0.00728506
cg04483282	0.904625	0.837632	-0.0669932	hypomethylation	0.000259103	0.00391309
cg04486436	0.8666	0.810452	-0.056148	hypomethylation	0.00679864	0.0137074
cg04488207	0.83177	0.759077	-0.0726926	hypomethylation	0.000768315	0.00545391
cg04492926	0.223202	0.171127	-0.0520745	hypomethylation	0.000875412	0.00576373
cg04496824	0.248356	0.197779	-0.0505777	hypomethylation	0.000571391	0.00501774
cg04498014	0.486318	0.427721	-0.0585962	hypomethylation	0.00468909	0.0114665
cg04500879	0.781466	0.716693	-0.0647736	hypomethylation	0.000371312	0.00435243
cg04508948	0.541508	0.488808	-0.0527007	hypomethylation	0.00124537	0.0066083
cg04511182	0.609824	0.540531	-0.0692934	hypomethylation	0.0150643	0.0222999
cg04513714	0.311609	0.261077	-0.0505323	hypomethylation	0.0010153	0.00607772
cg04514998	0.198743	0.140409	-0.0583339	hypomethylation	5.55361e-05	0.00261487
cg04517524	0.508068	0.575006	0.066938	hypermethylation	0.0143193	0.0215911
cg04522024	0.868402	0.8004	-0.0680014	hypomethylation	0.000240871	0.00375933
cg04524478	0.268935	0.185823	-0.083112	hypomethylation	1.91604e-05	0.00166285
cg04528427	0.772655	0.722487	-0.0501673	hypomethylation	0.0129168	0.020199
cg04533116	0.389592	0.335109	-0.0544829	hypomethylation	0.00191009	0.00774087
cg04541009	0.369117	0.314027	-0.0550895	hypomethylation	0.000863672	0.00573359
cg04546557	0.687098	0.6183	-0.068798	hypomethylation	0.00462064	0.0114051
cg04552530	0.347928	0.297071	-0.0508574	hypomethylation	0.00385139	0.0103015
cg04558948	0.653803	0.599379	-0.0544238	hypomethylation	0.00248157	0.00852891
cg04573872	0.866941	0.815825	-0.0511164	hypomethylation	0.00826407	0.0154148
cg04579398	0.441055	0.504172	0.0631167	hypermethylation	0.0113948	0.0186985
cg04585475	0.774887	0.702252	-0.0726347	hypomethylation	0.000470914	0.00470326
cg04595190	0.904294	0.853766	-0.0505283	hypomethylation	0.000271992	0.00394651
cg04601137	0.320397	0.267839	-0.0525575	hypomethylation	0.000944827	0.0059547
cg04610187	0.450823	0.399551	-0.0512725	hypomethylation	0.00498122	0.0117804
cg04612608	0.578842	0.657675	0.0788327	hypermethylation	0.000745977	0.00544803
cg04613301	0.281587	0.22766	-0.0539273	hypomethylation	0.000639039	0.0051916
cg04613576	0.895675	0.837991	-0.0576837	hypomethylation	0.00683787	0.0137617
cg04616064	0.703582	0.639136	-0.0644461	hypomethylation	0.0338037	0.0392299
cg04639988	0.259666	0.191556	-0.0681105	hypomethylation	9.15697e-05	0.00284303
cg04645211	0.198996	0.148736	-0.0502597	hypomethylation	0.00345021	0.00981295
cg04645534	0.453782	0.389531	-0.0642507	hypomethylation	0.0154154	0.022652
cg04652824	0.545368	0.494778	-0.0505904	hypomethylation	0.0156809	0.0228861
cg04654489	0.236194	0.184782	-0.0514118	hypomethylation	0.00504745	0.0118678
cg04656811	0.413673	0.361374	-0.0522995	hypomethylation	0.0227052	0.0294617
cg04657146	0.59095	0.380258	-0.210692	hypomethylation	0.00715671	0.0141045
cg04677123	0.60737	0.543991	-0.0633787	hypomethylation	0.00422732	0.0108628
cg04682830	0.834693	0.773662	-0.0610317	hypomethylation	0.000589998	0.00505967
cg04687241	0.685257	0.634186	-0.051071	hypomethylation	0.0220088	0.0288659
cg04692873	0.398718	0.345877	-0.0528406	hypomethylation	0.00705773	0.0140071
cg04705280	0.575071	0.515983	-0.059088	hypomethylation	0.0110262	0.0183814
cg04705669	0.521429	0.430757	-0.0906721	hypomethylation	0.0184866	0.0255943
cg04714058	0.811993	0.745476	-0.0665169	hypomethylation	0.00140562	0.00696347
cg04720309	0.892189	0.839676	-0.0525129	hypomethylation	0.00531796	0.0122344
cg04721103	0.918681	0.864182	-0.0544991	hypomethylation	0.00108112	0.00627074
cg04728254	0.86682	0.811354	-0.0554666	hypomethylation	0.00162436	0.00726106
cg04737087	0.312854	0.261879	-0.0509755	hypomethylation	0.00134756	0.00685334
cg04742384	0.777651	0.722891	-0.05476	hypomethylation	0.0139585	0.0212541
cg04748191	0.368972	0.316741	-0.0522317	hypomethylation	0.00875881	0.0159751
cg04768048	0.172699	0.112623	-0.0600764	hypomethylation	0.00125125	0.00663269
cg04779233	0.784609	0.731056	-0.0535532	hypomethylation	0.00982973	0.0171467
cg04781916	0.555076	0.493306	-0.0617706	hypomethylation	0.0130066	0.0202969
cg04783624	0.8088	0.723792	-0.0850075	hypomethylation	0.00312946	0.00937667
cg04790356	0.411243	0.352369	-0.058874	hypomethylation	0.0136546	0.0209435
cg04795110	0.859996	0.803703	-0.0562921	hypomethylation	0.0123598	0.019661
cg04807561	0.776001	0.707766	-0.0682347	hypomethylation	0.00995181	0.0172899
cg04821248	0.691837	0.769734	0.0778972	hypermethylation	0.0027358	0.00877578
cg04830221	0.691258	0.626908	-0.0643498	hypomethylation	0.00346685	0.00984029
cg04831327	0.455858	0.397979	-0.0578791	hypomethylation	0.0114775	0.0187927
cg04836354	0.251846	0.200267	-0.0515786	hypomethylation	0.00196792	0.00778549
cg04837280	0.315632	0.264366	-0.0512658	hypomethylation	0.00550286	0.0124124
cg04843935	0.611216	0.544961	-0.0662547	hypomethylation	0.0141374	0.0214284
cg04846508	0.372757	0.317822	-0.0549351	hypomethylation	0.00298176	0.00915698
cg04849320	0.291833	0.234361	-0.0574722	hypomethylation	0.0296689	0.0358034
cg04850382	0.599556	0.530248	-0.0693077	hypomethylation	0.00423497	0.0108628
cg04859027	0.55255	0.501509	-0.0510407	hypomethylation	0.017232	0.024468
cg04875128	0.207733	0.258476	0.0507437	hypermethylation	0.0197707	0.0267508
cg04875591	0.728153	0.668368	-0.0597851	hypomethylation	0.0135222	0.0208088
cg04876028	0.785959	0.723682	-0.0622774	hypomethylation	0.0185743	0.0256651
cg04876208	0.490568	0.429162	-0.0614058	hypomethylation	0.00588321	0.0128137
cg04883269	0.643997	0.593319	-0.0506783	hypomethylation	0.00138487	0.00690648
cg04883648	0.927867	0.873982	-0.0538855	hypomethylation	0.00175667	0.0074886
cg04887675	0.468103	0.411836	-0.0562666	hypomethylation	0.0242712	0.0309071
cg04890576	0.297336	0.232309	-0.0650271	hypomethylation	0.00305816	0.00926889
cg04894169	0.67724	0.738466	0.0612268	hypermethylation	0.0166969	0.0239144
cg04898765	0.958114	0.908021	-0.0500933	hypomethylation	0.00119117	0.00646
cg04904531	0.895291	0.840052	-0.0552388	hypomethylation	0.043386	0.0476744
cg04918696	0.667346	0.594821	-0.0725243	hypomethylation	0.0210427	0.0279125
cg04919516	0.852194	0.780331	-0.0718629	hypomethylation	0.000642287	0.0051916
cg04924028	0.612021	0.549718	-0.0623036	hypomethylation	0.00413951	0.0107279
cg04928457	0.832174	0.777759	-0.0544145	hypomethylation	0.0113521	0.0186796
cg04943581	0.495068	0.436241	-0.0588266	hypomethylation	0.00211232	0.00799145
cg04944278	0.875882	0.822102	-0.0537799	hypomethylation	0.0415916	0.0460519
cg04944853	0.935633	0.859222	-0.0764111	hypomethylation	0.00173822	0.00747946
cg04945518	0.870821	0.817008	-0.0538122	hypomethylation	0.014281	0.0215591
cg04949153	0.38838	0.335996	-0.0523835	hypomethylation	0.0133387	0.0206114
cg04949225	0.238191	0.187316	-0.0508756	hypomethylation	0.00100229	0.00606074
cg04955246	0.776003	0.696436	-0.0795667	hypomethylation	0.000493119	0.0047729
cg04966286	0.238575	0.183169	-0.0554057	hypomethylation	0.0046502	0.0114293
cg04966942	0.693513	0.623944	-0.0695693	hypomethylation	0.00218964	0.00813057
cg04970434	0.659342	0.607285	-0.052057	hypomethylation	0.00225877	0.00823864
cg04970945	0.838987	0.781269	-0.0577183	hypomethylation	0.00763056	0.0147125
cg04974402	0.489272	0.437267	-0.052005	hypomethylation	0.00746275	0.0144992
cg04993355	0.73347	0.651748	-0.0817224	hypomethylation	0.00795194	0.0150523
cg05002041	0.226365	0.141469	-0.0848959	hypomethylation	4.52658e-08	5.07249e-05
cg05003832	0.757898	0.69236	-0.0655373	hypomethylation	0.00205199	0.00790501
cg05009104	0.80841	0.753129	-0.0552809	hypomethylation	0.0201096	0.0270981
cg05012661	0.552854	0.498108	-0.0547455	hypomethylation	0.0182095	0.0253361
cg05014721	0.616528	0.686108	0.0695805	hypermethylation	0.00955461	0.0168523
cg05020409	0.861712	0.792462	-0.06925	hypomethylation	0.000340641	0.0042104
cg05021355	0.474293	0.407348	-0.0669451	hypomethylation	0.0143107	0.0215893
cg05028259	0.931956	0.871923	-0.0600321	hypomethylation	0.0216754	0.0285557
cg05031539	0.877858	0.802573	-0.0752849	hypomethylation	0.000232434	0.00369979
cg05039282	0.433304	0.379886	-0.0534178	hypomethylation	0.027803	0.0341259
cg05041596	0.355328	0.303708	-0.0516196	hypomethylation	0.0450722	0.0491447
cg05043910	0.66659	0.560342	-0.106248	hypomethylation	0.0106478	0.0179644
cg05044291	0.343993	0.271513	-0.07248	hypomethylation	0.0389925	0.0438265
cg05046272	0.563012	0.511677	-0.0513356	hypomethylation	0.0103555	0.0176895
cg05056825	0.836097	0.886279	0.050182	hypermethylation	0.00667923	0.0136136
cg05062489	0.651832	0.581101	-0.0707302	hypomethylation	0.00110717	0.0062834
cg05062618	0.263029	0.2059	-0.0571292	hypomethylation	0.000284523	0.00403242
cg05063250	0.508299	0.436333	-0.0719664	hypomethylation	0.0222043	0.0290197
cg05072559	0.771312	0.717607	-0.0537047	hypomethylation	0.00603973	0.0129866
cg05073904	0.833736	0.771599	-0.0621372	hypomethylation	0.00788077	0.0149884
cg05075169	0.252065	0.20015	-0.0519149	hypomethylation	0.00187394	0.00768799
cg05082311	0.442132	0.372544	-0.0695878	hypomethylation	0.000100504	0.00288861
cg05091658	0.346202	0.440956	0.0947532	hypermethylation	0.0114505	0.018765
cg05094984	0.148202	0.208957	0.0607549	hypermethylation	0.0364984	0.0417008
cg05114748	0.824108	0.88548	0.0613725	hypermethylation	0.0134811	0.0207626
cg05119883	0.395857	0.302788	-0.0930694	hypomethylation	0.00808213	0.0152138
cg05136926	0.404161	0.347223	-0.056938	hypomethylation	0.00565904	0.0125525
cg05138776	0.92699	0.849896	-0.0770932	hypomethylation	0.000608162	0.005129
cg05138892	0.808038	0.866607	0.0585689	hypermethylation	0.00614398	0.0130892
cg05140286	0.827295	0.767248	-0.0600478	hypomethylation	0.014615	0.0218835
cg05146534	0.240388	0.189571	-0.050817	hypomethylation	0.023745	0.0303891
cg05148931	0.281436	0.225565	-0.0558708	hypomethylation	0.00134901	0.00685334
cg05158606	0.455755	0.381231	-0.0745236	hypomethylation	0.0035142	0.00990447
cg05164163	0.267824	0.20431	-0.0635139	hypomethylation	0.00146893	0.00707585
cg05165779	0.877702	0.815232	-0.0624702	hypomethylation	0.00538159	0.0122773
cg05167694	0.65185	0.591421	-0.0604284	hypomethylation	0.00371069	0.0101565
cg05186090	0.936451	0.885761	-0.0506895	hypomethylation	0.00133475	0.00685025
cg05194346	0.539814	0.456225	-0.0835882	hypomethylation	2.56659e-05	0.00178455
cg05194412	0.463623	0.409842	-0.0537807	hypomethylation	0.0131418	0.0203971
cg05197995	0.478185	0.427352	-0.0508332	hypomethylation	0.00875879	0.0159751
cg05202858	0.505164	0.432901	-0.072262	hypomethylation	0.028953	0.0351134
cg05204095	0.501187	0.447452	-0.0537357	hypomethylation	0.0437294	0.047967
cg05206344	0.45486	0.397793	-0.0570663	hypomethylation	0.00961495	0.0169092
cg05206633	0.495066	0.434188	-0.0608781	hypomethylation	0.0185037	0.0256117
cg05212403	0.929551	0.877971	-0.0515794	hypomethylation	0.00307127	0.00927673
cg05213296	0.379697	0.293582	-0.0861155	hypomethylation	0.0155375	0.022748
cg05215521	0.906786	0.847824	-0.0589615	hypomethylation	0.0246577	0.0312998
cg05219896	0.637075	0.586112	-0.0509631	hypomethylation	0.000968875	0.00598078
cg05222354	0.429899	0.372316	-0.0575833	hypomethylation	0.000654256	0.00520709
cg05225311	0.165927	0.106135	-0.0597919	hypomethylation	3.92441e-05	0.00214262
cg05244682	0.934455	0.883288	-0.0511672	hypomethylation	0.00859562	0.0157906
cg05247113	0.439927	0.386434	-0.0534931	hypomethylation	0.0115142	0.0188216
cg05250352	0.946295	0.881443	-0.064852	hypomethylation	0.00306537	0.00926889
cg05254287	0.600036	0.546377	-0.0536588	hypomethylation	0.00613989	0.0130892
cg05255811	0.481005	0.428975	-0.0520301	hypomethylation	0.0187748	0.0258442
cg05265936	0.660478	0.590758	-0.0697205	hypomethylation	0.00205035	0.00790501
cg05269080	0.551195	0.496936	-0.054259	hypomethylation	0.0132967	0.0205691
cg05272661	0.941532	0.884222	-0.0573108	hypomethylation	0.000642109	0.0051916
cg05273321	0.577487	0.511136	-0.0663502	hypomethylation	0.0331817	0.0387651
cg05278780	0.677588	0.553493	-0.124096	hypomethylation	0.00311254	0.00935004
cg05283597	0.456014	0.4035	-0.0525141	hypomethylation	0.000587614	0.00505967
cg05288977	0.305228	0.24944	-0.0557885	hypomethylation	2.28647e-05	0.00175494
cg05290582	0.476616	0.418165	-0.0584509	hypomethylation	0.0038052	0.0102768
cg05291677	0.827931	0.895469	0.0675376	hypermethylation	0.00502066	0.0118246
cg05291862	0.454545	0.401959	-0.0525858	hypomethylation	0.00424458	0.0108639
cg05294813	0.252536	0.201484	-0.051052	hypomethylation	0.0341485	0.0395073
cg05298847	0.445045	0.381265	-0.0637798	hypomethylation	0.0055205	0.0124389
cg05300378	0.59878	0.534917	-0.0638636	hypomethylation	0.000142924	0.00329548
cg05309177	0.552311	0.498613	-0.0536978	hypomethylation	0.0329828	0.0385971
cg05310160	0.624144	0.690925	0.0667813	hypermethylation	0.00980106	0.0171076
cg05313263	0.315078	0.243477	-0.0716012	hypomethylation	0.00308016	0.00928355
cg05316864	0.47447	0.418733	-0.0557362	hypomethylation	0.000268037	0.00392173
cg05318186	0.515357	0.447074	-0.068283	hypomethylation	0.000374239	0.00436103
cg05318849	0.31462	0.26448	-0.0501395	hypomethylation	0.000674621	0.00524987
cg05330718	0.263964	0.212376	-0.0515884	hypomethylation	0.00239469	0.00841218
cg05331611	0.600054	0.547115	-0.0529396	hypomethylation	0.000733088	0.0054046
cg05332159	0.266588	0.192135	-0.0744526	hypomethylation	3.13766e-05	0.00197532
cg05340042	0.724235	0.671877	-0.052359	hypomethylation	0.000389576	0.00443454
cg05341111	0.3201	0.262789	-0.0573111	hypomethylation	0.000977242	0.00599725
cg05345996	0.864056	0.810951	-0.0531059	hypomethylation	0.00307442	0.00928122
cg05350293	0.557215	0.503284	-0.0539305	hypomethylation	0.00514251	0.0120046
cg05355184	0.904911	0.846084	-0.0588271	hypomethylation	0.000541214	0.00492713
cg05358915	0.689717	0.638075	-0.0516414	hypomethylation	0.00217485	0.00810218
cg05359714	0.461424	0.408226	-0.0531977	hypomethylation	0.0282931	0.0345675
cg05360958	0.293175	0.231581	-0.0615938	hypomethylation	0.000325289	0.00414967
cg05371159	0.320298	0.249583	-0.0707156	hypomethylation	0.000312881	0.00414967
cg05376756	0.906065	0.837865	-0.0682	hypomethylation	0.00379333	0.0102768
cg05387546	0.717307	0.780493	0.0631859	hypermethylation	0.0287734	0.034956
cg05392610	0.916458	0.861376	-0.055082	hypomethylation	0.00268253	0.00871317
cg05392947	0.48833	0.427468	-0.060862	hypomethylation	0.00635335	0.0132723
cg05397033	0.80951	0.859673	0.0501637	hypermethylation	0.0093852	0.0166606
cg05401590	0.368384	0.312371	-0.0560133	hypomethylation	0.00650042	0.0134194
cg05402062	0.683413	0.617889	-0.0655244	hypomethylation	0.00152565	0.00714636
cg05403689	0.735572	0.798414	0.0628427	hypermethylation	0.003432	0.00979335
cg05404236	0.277938	0.342239	0.0643005	hypermethylation	0.00863507	0.015824
cg05406923	0.35121	0.272454	-0.0787558	hypomethylation	0.00384303	0.0103015
cg05408873	0.954988	0.898899	-0.056089	hypomethylation	0.0077695	0.0148547
cg05413694	0.838723	0.787488	-0.0512353	hypomethylation	0.00793714	0.015045
cg05441039	0.208901	0.157854	-0.0510468	hypomethylation	0.017586	0.0247756
cg05446675	0.529522	0.461184	-0.0683388	hypomethylation	0.00402275	0.0105571
cg05449874	0.525579	0.469164	-0.0564145	hypomethylation	0.0331049	0.0387076
cg05451210	0.357479	0.300755	-0.0567244	hypomethylation	0.00123877	0.00660403
cg05474006	0.755985	0.690063	-0.0659224	hypomethylation	0.000297442	0.00410917
cg05478821	0.787764	0.866421	0.0786571	hypermethylation	0.00622473	0.0131861
cg05483391	0.800407	0.747624	-0.0527828	hypomethylation	0.00880185	0.0160166
cg05498680	0.244067	0.185426	-0.0586409	hypomethylation	6.94616e-05	0.0027408
cg05500904	0.441702	0.39041	-0.0512924	hypomethylation	0.0346922	0.0399713
cg05509190	0.186406	0.134392	-0.052014	hypomethylation	0.000171162	0.00350187
cg05513735	0.415711	0.330735	-0.084976	hypomethylation	0.00139457	0.00693324
cg05514909	0.425061	0.488556	0.0634953	hypermethylation	0.0311237	0.0371271
cg05517875	0.370789	0.318824	-0.0519649	hypomethylation	0.00291324	0.00904696
cg05518370	0.642151	0.579862	-0.0622891	hypomethylation	0.00651476	0.0134194
cg05520811	0.462587	0.408765	-0.0538217	hypomethylation	0.00187865	0.00768799
cg05523882	0.489043	0.43614	-0.0529026	hypomethylation	0.0279067	0.0341923
cg05526038	0.640153	0.562401	-0.0777521	hypomethylation	0.00312792	0.00937667
cg05533615	0.437816	0.375791	-0.0620251	hypomethylation	5.04993e-05	0.00247409
cg05537253	0.532464	0.472051	-0.060413	hypomethylation	0.00406969	0.0106385
cg05539101	0.87066	0.81822	-0.0524401	hypomethylation	0.0103248	0.0176534
cg05551469	0.49087	0.431024	-0.0598463	hypomethylation	0.00150674	0.00711244
cg05557516	0.296634	0.24432	-0.0523139	hypomethylation	0.00174294	0.00748703
cg05561193	0.587919	0.536494	-0.0514247	hypomethylation	0.0138018	0.0210942
cg05570783	0.65087	0.718347	0.0674769	hypermethylation	0.000959541	0.00598078
cg05579598	0.453159	0.39164	-0.0615198	hypomethylation	0.000504013	0.00481088
cg05580141	0.359789	0.309626	-0.0501627	hypomethylation	0.00636157	0.0132723
cg05583110	0.326114	0.273923	-0.0521909	hypomethylation	0.00160344	0.00726072
cg05589489	0.568661	0.624635	0.0559743	hypermethylation	0.00323577	0.00955721
cg05602310	0.767227	0.709504	-0.0577234	hypomethylation	0.00651182	0.0134194
cg05610990	0.912591	0.857359	-0.0552322	hypomethylation	0.00429079	0.0109229
cg05612094	0.394245	0.332678	-0.061567	hypomethylation	0.00270141	0.00874914
cg05620261	0.360419	0.424795	0.064376	hypermethylation	0.000541695	0.00492713
cg05623253	0.559994	0.494174	-0.0658195	hypomethylation	0.0234774	0.0301153
cg05624376	0.37264	0.316917	-0.0557234	hypomethylation	0.00625485	0.013205
cg05628259	0.836586	0.775622	-0.0609645	hypomethylation	0.000701086	0.00532624
cg05639690	0.531402	0.474366	-0.0570364	hypomethylation	0.00481398	0.011609
cg05641656	0.427981	0.37417	-0.053811	hypomethylation	0.00476375	0.0115637
cg05649487	0.572529	0.509381	-0.0631481	hypomethylation	0.00333235	0.00969929
cg05650260	0.23982	0.184332	-0.0554887	hypomethylation	0.0141876	0.021473
cg05654278	0.734058	0.789779	0.0557219	hypermethylation	0.00169798	0.00739796
cg05655457	0.278754	0.227004	-0.0517494	hypomethylation	0.00146246	0.00707585
cg05663480	0.440404	0.371583	-0.0688216	hypomethylation	0.00706169	0.0140071
cg05666287	0.684093	0.633043	-0.0510495	hypomethylation	0.0236855	0.0303268
cg05680541	0.528435	0.46828	-0.0601558	hypomethylation	0.0385046	0.0434087
cg05700860	0.612491	0.540658	-0.071833	hypomethylation	0.00646309	0.0133811
cg05714008	0.678812	0.60035	-0.0784621	hypomethylation	0.00666879	0.0136022
cg05733557	0.903902	0.84262	-0.061282	hypomethylation	0.00436626	0.0110348
cg05740418	0.242193	0.191149	-0.0510441	hypomethylation	0.00230265	0.00833223
cg05741666	0.455724	0.397193	-0.0585308	hypomethylation	0.0405944	0.0452188
cg05743798	0.705824	0.644843	-0.0609812	hypomethylation	0.0135301	0.0208153
cg05751066	0.850142	0.797272	-0.0528699	hypomethylation	0.000624989	0.00518296
cg05757007	0.816934	0.757745	-0.0591888	hypomethylation	0.000305952	0.0041428
cg05757803	0.797868	0.870893	0.0730252	hypermethylation	0.00484617	0.0116238
cg05765254	0.891885	0.820152	-0.0717328	hypomethylation	0.00427095	0.0108872
cg05766510	0.709983	0.765261	0.0552776	hypermethylation	0.0241772	0.0308084
cg05767035	0.873138	0.816134	-0.0570045	hypomethylation	0.00283433	0.00892176
cg05767404	0.307725	0.253612	-0.0541126	hypomethylation	0.0447466	0.0488533
cg05783316	0.912703	0.850137	-0.0625658	hypomethylation	0.0101765	0.0175227
cg05784098	0.716058	0.639496	-0.0765618	hypomethylation	0.000263833	0.00392173
cg05785311	0.782017	0.725215	-0.056802	hypomethylation	0.0126841	0.0199744
cg05785747	0.563237	0.498503	-0.0647343	hypomethylation	0.000898807	0.00582624
cg05792494	0.357106	0.298713	-0.0583938	hypomethylation	0.000290601	0.00406045
cg05796475	0.452117	0.388366	-0.0637515	hypomethylation	0.00802841	0.0151407
cg05811998	0.379455	0.317623	-0.0618321	hypomethylation	0.00384	0.0103015
cg05816188	0.283526	0.215799	-0.0677268	hypomethylation	0.000741383	0.00544425
cg05820861	0.808463	0.873108	0.0646447	hypermethylation	0.0232831	0.0299347
cg05824936	0.338373	0.283085	-0.0552881	hypomethylation	0.0041809	0.0107952
cg05825244	0.49447	0.593796	0.0993261	hypermethylation	0.00636827	0.0132743
cg05840541	0.281648	0.219401	-0.0622468	hypomethylation	0.000716314	0.00533002
cg05844977	0.749947	0.693872	-0.0560742	hypomethylation	0.00169332	0.00739498
cg05845376	0.68272	0.764886	0.0821662	hypermethylation	0.0102072	0.0175594
cg05856321	0.404314	0.311628	-0.092686	hypomethylation	0.00423548	0.0108628
cg05857996	0.673694	0.73581	0.0621159	hypermethylation	0.0230037	0.0297173
cg05858126	0.395004	0.343912	-0.0510916	hypomethylation	0.0060425	0.0129866
cg05858709	0.226097	0.17333	-0.0527671	hypomethylation	0.00433858	0.0109918
cg05858946	0.417377	0.35029	-0.0670876	hypomethylation	0.00391185	0.0103794
cg05859572	0.393778	0.343558	-0.0502202	hypomethylation	0.00346229	0.00984029
cg05868443	0.321534	0.217617	-0.103918	hypomethylation	0.00272354	0.00877578
cg05869737	0.575708	0.512325	-0.063383	hypomethylation	0.01734	0.0245529
cg05878104	0.319915	0.233977	-0.0859374	hypomethylation	0.0188762	0.0259351
cg05882529	0.602951	0.547562	-0.0553892	hypomethylation	0.00985186	0.0171588
cg05884192	0.38753	0.337203	-0.0503271	hypomethylation	0.000668877	0.005236
cg05889085	0.426954	0.367773	-0.0591802	hypomethylation	0.0124208	0.0197014
cg05893796	0.505423	0.453872	-0.0515511	hypomethylation	0.00298803	0.00915986
cg05904180	0.569259	0.504514	-0.064745	hypomethylation	0.0337241	0.03917
cg05907464	0.645634	0.557597	-0.0880368	hypomethylation	0.0196638	0.0266512
cg05908615	0.934768	0.875078	-0.0596902	hypomethylation	0.00979883	0.0171076
cg05912182	0.655848	0.600516	-0.055332	hypomethylation	0.00307836	0.00928314
cg05930053	0.432682	0.382113	-0.0505694	hypomethylation	0.0138375	0.0211316
cg05930586	0.75713	0.807232	0.0501019	hypermethylation	0.0163687	0.0235732
cg05934592	0.331567	0.281377	-0.0501898	hypomethylation	0.000196016	0.00352963
cg05938607	0.237469	0.180568	-0.0569013	hypomethylation	0.0160428	0.0232329
cg05939089	0.843829	0.788651	-0.0551778	hypomethylation	0.000610589	0.00513683
cg05940452	0.501649	0.565714	0.0640651	hypermethylation	0.0259299	0.0324587
cg05941153	0.440052	0.368921	-0.0711306	hypomethylation	0.00150548	0.00711244
cg05941378	0.373373	0.320534	-0.0528393	hypomethylation	0.00437223	0.0110449
cg05941864	0.367261	0.310377	-0.0568841	hypomethylation	0.0108402	0.0181702
cg05951994	0.262568	0.211843	-0.0507247	hypomethylation	0.0309175	0.0369914
cg05965029	0.231709	0.172103	-0.0596057	hypomethylation	9.13582e-07	0.000328762
cg05971072	0.872774	0.781749	-0.0910248	hypomethylation	0.000157292	0.00342921
cg05974501	0.831409	0.768931	-0.0624782	hypomethylation	0.0220963	0.0289266
cg05976283	0.331893	0.280433	-0.0514598	hypomethylation	0.00872865	0.0159464
cg05988129	0.462616	0.411342	-0.0512732	hypomethylation	0.0366812	0.0418159
cg05992904	0.860205	0.800754	-0.0594513	hypomethylation	0.012475	0.0197451
cg05995254	0.937778	0.885327	-0.0524514	hypomethylation	0.000342254	0.0042104
cg05995465	0.868895	0.688228	-0.180667	hypomethylation	0.0182452	0.0253794
cg05998565	0.942407	0.891008	-0.0513999	hypomethylation	0.00365002	0.0100758
cg06007042	0.53082	0.46644	-0.0643805	hypomethylation	0.0127788	0.0200559
cg06012263	0.467774	0.404276	-0.0634989	hypomethylation	0.0220206	0.028869
cg06016850	0.427213	0.372732	-0.054481	hypomethylation	0.0403621	0.0450227
cg06026296	0.485106	0.431919	-0.0531873	hypomethylation	0.00533559	0.0122563
cg06029095	0.796112	0.739693	-0.0564195	hypomethylation	0.000113125	0.00310705
cg06035600	0.429569	0.489061	0.0594923	hypermethylation	0.0217408	0.0286351
cg06040034	0.501765	0.443704	-0.0580607	hypomethylation	0.0272842	0.0336726
cg06042058	0.828672	0.773054	-0.0556179	hypomethylation	0.00876209	0.0159759
cg06047130	0.92649	0.866599	-0.0598903	hypomethylation	0.0199757	0.0269566
cg06059616	0.394335	0.329837	-0.0644981	hypomethylation	0.0164846	0.0237071
cg06064509	0.76661	0.701315	-0.065295	hypomethylation	0.000119133	0.00313382
cg06080068	0.725285	0.66884	-0.0564448	hypomethylation	0.0297625	0.0358776
cg06089353	0.475652	0.416268	-0.0593838	hypomethylation	0.0447985	0.0489004
cg06090404	0.182337	0.129374	-0.0529624	hypomethylation	0.0159754	0.0231771
cg06097079	0.348534	0.293674	-0.0548602	hypomethylation	0.000236077	0.00370395
cg06098761	0.297613	0.354955	0.057342	hypermethylation	0.00360219	0.0100182
cg06099001	0.861843	0.80323	-0.0586129	hypomethylation	0.00192415	0.00774087
cg06107159	0.411601	0.349265	-0.0623351	hypomethylation	0.00669717	0.0136303
cg06115838	0.573224	0.409649	-0.163575	hypomethylation	0.0243469	0.0309683
cg06124892	0.265378	0.212133	-0.0532454	hypomethylation	0.000324202	0.00414967
cg06125671	0.569122	0.511708	-0.0574136	hypomethylation	0.00608771	0.0130238
cg06131833	0.326479	0.274289	-0.0521902	hypomethylation	0.00162434	0.00726106
cg06137588	0.299705	0.24187	-0.0578342	hypomethylation	0.00221588	0.00815992
cg06139856	0.460858	0.268419	-0.192439	hypomethylation	0.0209743	0.0278349
cg06168656	0.422416	0.344414	-0.0780014	hypomethylation	0.00890479	0.0161181
cg06172950	0.245469	0.195225	-0.0502439	hypomethylation	0.00156382	0.00723579
cg06174261	0.41733	0.358254	-0.0590758	hypomethylation	0.0179548	0.0251125
cg06174561	0.442328	0.382051	-0.0602769	hypomethylation	0.0266616	0.0331252
cg06178322	0.112918	0.163464	0.0505467	hypermethylation	0.0187168	0.0257856
cg06178383	0.493521	0.442341	-0.0511805	hypomethylation	0.0347152	0.0399896
cg06192592	0.784727	0.734726	-0.0500012	hypomethylation	0.00546074	0.0123995
cg06193766	0.776415	0.701195	-0.0752203	hypomethylation	0.0283405	0.0345952
cg06198139	0.519404	0.4676	-0.051804	hypomethylation	0.00469294	0.0114673
cg06198149	0.923798	0.856138	-0.0676604	hypomethylation	0.0127219	0.0199978
cg06200449	0.911457	0.855974	-0.0554837	hypomethylation	0.00258008	0.00863055
cg06203181	0.492657	0.421737	-0.0709197	hypomethylation	0.0460583	0.0499834
cg06203364	0.535362	0.595878	0.0605159	hypermethylation	0.000870862	0.00575111
cg06210576	0.939214	0.87768	-0.0615344	hypomethylation	0.0218724	0.02877
cg06214378	0.420944	0.360828	-0.0601166	hypomethylation	0.0187126	0.0257856
cg06218095	0.70934	0.61847	-0.0908693	hypomethylation	0.0231947	0.0298596
cg06221963	0.680946	0.576581	-0.104366	hypomethylation	0.0286568	0.0348673
cg06226884	0.285745	0.212679	-0.0730658	hypomethylation	0.00572888	0.0126294
cg06237102	0.461864	0.39355	-0.0683138	hypomethylation	0.00276534	0.00881147
cg06245711	0.535216	0.476704	-0.0585117	hypomethylation	0.00385364	0.0103015
cg06254604	0.219643	0.169038	-0.0506053	hypomethylation	0.000421614	0.00453135
cg06255037	0.731718	0.674498	-0.0572197	hypomethylation	0.000179791	0.00351
cg06257058	0.392708	0.342586	-0.0501219	hypomethylation	0.0141381	0.0214284
cg06273882	0.354414	0.302216	-0.0521981	hypomethylation	0.0384321	0.0433444
cg06278181	0.909957	0.853025	-0.0569321	hypomethylation	0.0116328	0.0189198
cg06278337	0.75963	0.704551	-0.0550785	hypomethylation	0.0108412	0.0181702
cg06279276	0.268585	0.325028	0.0564427	hypermethylation	0.00983881	0.0171468
cg06279725	0.534147	0.483946	-0.0502008	hypomethylation	0.0193952	0.0264343
cg06283493	0.262089	0.207265	-0.0548241	hypomethylation	0.00240789	0.00842593
cg06286127	0.776215	0.715196	-0.0610189	hypomethylation	0.0112844	0.0186179
cg06288552	0.80955	0.732601	-0.0769493	hypomethylation	0.00114314	0.00634436
cg06292396	0.874368	0.806034	-0.0683333	hypomethylation	0.0387284	0.0435996
cg06292784	0.662377	0.59879	-0.0635866	hypomethylation	0.0366389	0.0417931
cg06299443	0.863014	0.807113	-0.0559013	hypomethylation	0.00459075	0.0113814
cg06300892	0.711451	0.658514	-0.0529374	hypomethylation	0.0438003	0.0480073
cg06305962	0.629325	0.723615	0.0942901	hypermethylation	0.00348809	0.0098656
cg06307913	0.366144	0.301667	-0.0644772	hypomethylation	0.0399077	0.0446314
cg06310844	0.327058	0.263983	-0.0630752	hypomethylation	1.50798e-07	0.000127134
cg06311934	0.844485	0.775109	-0.0693766	hypomethylation	0.00114425	0.00634436
cg06328750	0.688559	0.638452	-0.0501067	hypomethylation	0.0204638	0.0273976
cg06330673	0.90798	0.838518	-0.0694618	hypomethylation	0.00124547	0.0066083
cg06339924	0.575069	0.50744	-0.0676289	hypomethylation	0.00652932	0.0134271
cg06343745	0.669529	0.607769	-0.0617608	hypomethylation	0.0068924	0.0138267
cg06346081	0.265441	0.199337	-0.0661044	hypomethylation	0.000404317	0.00450184
cg06351520	0.743348	0.674345	-0.0690028	hypomethylation	0.000341225	0.0042104
cg06353655	0.540649	0.489526	-0.0511233	hypomethylation	0.00477068	0.0115637
cg06354975	0.780022	0.71924	-0.0607822	hypomethylation	0.0108871	0.0182146
cg06359056	0.593537	0.54226	-0.0512777	hypomethylation	0.0383623	0.0432831
cg06359375	0.524198	0.473685	-0.0505129	hypomethylation	0.000797103	0.00553918
cg06360527	0.823228	0.771969	-0.0512592	hypomethylation	0.00276752	0.00881147
cg06365016	0.764572	0.823938	0.0593655	hypermethylation	0.0256563	0.0322098
cg06373687	0.382661	0.332205	-0.0504554	hypomethylation	0.000426096	0.00454746
cg06373870	0.467807	0.413771	-0.0540364	hypomethylation	0.0303044	0.03639
cg06374258	0.32359	0.271663	-0.0519267	hypomethylation	0.000839764	0.00567829
cg06391251	0.68657	0.634866	-0.0517038	hypomethylation	0.00521069	0.0120943
cg06398397	0.371271	0.309974	-0.0612975	hypomethylation	0.0205529	0.0274906
cg06399164	0.586123	0.529771	-0.0563522	hypomethylation	0.00288713	0.00901204
cg06406458	0.849902	0.676901	-0.173001	hypomethylation	0.00620864	0.0131647
cg06413398	0.261319	0.206293	-0.0550258	hypomethylation	0.00408794	0.0106419
cg06417478	0.581786	0.37711	-0.204676	hypomethylation	0.00549734	0.01241
cg06418113	0.298075	0.247448	-0.0506267	hypomethylation	0.00186674	0.00767939
cg06418238	0.34345	0.281853	-0.0615968	hypomethylation	0.010283	0.0176261
cg06418245	0.913199	0.862155	-0.0510447	hypomethylation	0.000606398	0.00512466
cg06424894	0.337851	0.287009	-0.0508417	hypomethylation	0.0459912	0.0499311
cg06426114	0.539536	0.484033	-0.0555034	hypomethylation	0.00821384	0.0153697
cg06427502	0.381624	0.324841	-0.0567833	hypomethylation	2.18497e-05	0.0017385
cg06433816	0.879554	0.79233	-0.0872242	hypomethylation	0.0102921	0.0176261
cg06446551	0.856902	0.793255	-0.0636472	hypomethylation	0.0174308	0.0246246
cg06448683	0.349951	0.285892	-0.0640591	hypomethylation	0.0207907	0.0277094
cg06454579	0.912053	0.86165	-0.0504037	hypomethylation	0.000718306	0.00533069
cg06460642	0.423669	0.343842	-0.0798269	hypomethylation	0.00376953	0.0102493
cg06462970	0.542547	0.467714	-0.0748329	hypomethylation	0.00518314	0.0120653
cg06470855	0.670663	0.617305	-0.0533582	hypomethylation	0.0428708	0.0472108
cg06480733	0.62514	0.57038	-0.0547607	hypomethylation	0.00838314	0.0155687
cg06481517	0.592141	0.537067	-0.0550741	hypomethylation	0.0203124	0.0272796
cg06484146	0.281889	0.20687	-0.0750188	hypomethylation	0.00900663	0.0162108
cg06486190	0.539775	0.472553	-0.0672217	hypomethylation	0.00398577	0.0105055
cg06487943	0.394112	0.333524	-0.0605876	hypomethylation	0.0109143	0.0182546
cg06490845	0.597882	0.545868	-0.0520147	hypomethylation	0.0101244	0.0174544
cg06496041	0.716862	0.654577	-0.0622855	hypomethylation	0.0237902	0.0304052
cg06503201	0.316755	0.258844	-0.0579118	hypomethylation	0.00164879	0.00732028
cg06507137	0.825993	0.77089	-0.0551032	hypomethylation	0.00142674	0.00702464
cg06508738	0.730165	0.664711	-0.0654535	hypomethylation	0.0429391	0.0472482
cg06510708	0.502573	0.451388	-0.0511851	hypomethylation	0.00434339	0.0109968
cg06520846	0.228837	0.166537	-0.0622999	hypomethylation	0.00121811	0.00654996
cg06532879	0.940492	0.880908	-0.0595846	hypomethylation	0.000660326	0.005211
cg06540278	0.781888	0.718533	-0.0633554	hypomethylation	2.63991e-05	0.00178455
cg06550582	0.620897	0.55837	-0.0625266	hypomethylation	0.0220618	0.0288881
cg06562103	0.914332	0.862882	-0.0514505	hypomethylation	0.00810796	0.0152438
cg06563472	0.955244	0.900172	-0.0550719	hypomethylation	0.0140425	0.0213399
cg06565913	0.382792	0.309935	-0.0728571	hypomethylation	0.00266781	0.008713
cg06575863	0.92052	0.855438	-0.0650821	hypomethylation	0.0185884	0.0256782
cg06584784	0.774951	0.705348	-0.069603	hypomethylation	0.00842841	0.0156269
cg06595479	0.407436	0.469483	0.0620469	hypermethylation	0.00824238	0.0153889
cg06599983	0.902768	0.833723	-0.0690454	hypomethylation	2.56013e-05	0.00178455
cg06600444	0.695488	0.535558	-0.15993	hypomethylation	0.000187445	0.00352963
cg06601098	0.367322	0.305901	-0.0614218	hypomethylation	0.0135504	0.020835
cg06604589	0.292682	0.238274	-0.0544075	hypomethylation	0.00628026	0.0132176
cg06615316	0.832638	0.895459	0.0628211	hypermethylation	0.00104456	0.00618435
cg06616408	0.486201	0.429398	-0.0568026	hypomethylation	0.0191689	0.0262407
cg06621843	0.497818	0.445656	-0.0521629	hypomethylation	0.0110045	0.0183615
cg06636551	0.278335	0.198957	-0.0793779	hypomethylation	0.00602812	0.0129793
cg06637170	0.297763	0.244842	-0.0529212	hypomethylation	0.000414695	0.004521
cg06638023	0.321413	0.270821	-0.0505914	hypomethylation	0.00381539	0.0102768
cg06639609	0.857123	0.798217	-0.0589062	hypomethylation	0.00059055	0.00505967
cg06645081	0.26594	0.211358	-0.0545824	hypomethylation	0.0038589	0.0103057
cg06658912	0.748943	0.691075	-0.0578687	hypomethylation	0.0369454	0.04204
cg06660522	0.450181	0.384472	-0.0657097	hypomethylation	0.00556132	0.0124496
cg06665786	0.431835	0.381734	-0.0501014	hypomethylation	0.000184023	0.00352963
cg06666727	0.866524	0.807981	-0.0585428	hypomethylation	0.0075872	0.0146539
cg06669598	0.70653	0.593389	-0.11314	hypomethylation	1.51098e-05	0.00147251
cg06671087	0.537648	0.475362	-0.0622863	hypomethylation	0.0119462	0.0192507
cg06673020	0.848151	0.755477	-0.0926746	hypomethylation	9.23094e-05	0.00284303
cg06680863	0.682635	0.618074	-0.0645605	hypomethylation	0.0176539	0.0248343
cg06683094	0.641268	0.582575	-0.0586932	hypomethylation	0.0110502	0.0184159
cg06683734	0.279759	0.223604	-0.0561549	hypomethylation	0.00185749	0.00766951
cg06686132	0.894242	0.839085	-0.055157	hypomethylation	0.0243827	0.0309998
cg06686789	0.594178	0.537501	-0.0566771	hypomethylation	0.0186148	0.0256893
cg06686895	0.615721	0.552283	-0.0634378	hypomethylation	0.04497	0.0490685
cg06688960	0.188989	0.103967	-0.0850223	hypomethylation	0.00480952	0.0116054
cg06701796	0.804645	0.753854	-0.0507912	hypomethylation	0.000969731	0.00598078
cg06703343	0.386441	0.313833	-0.0726079	hypomethylation	0.0355139	0.0407755
cg06705237	0.488276	0.433486	-0.0547894	hypomethylation	0.00361107	0.0100262
cg06706156	0.422277	0.363004	-0.0592738	hypomethylation	0.0075543	0.0146055
cg06709721	0.24655	0.194667	-0.0518831	hypomethylation	0.000825754	0.00563372
cg06716138	0.903491	0.840648	-0.0628434	hypomethylation	0.00306298	0.00926889
cg06721232	0.588336	0.527567	-0.0607694	hypomethylation	0.00532412	0.0122409
cg06722407	0.461842	0.384748	-0.0770937	hypomethylation	0.020363	0.0273017
cg06727305	0.536739	0.485206	-0.0515337	hypomethylation	0.0029675	0.00913565
cg06728055	0.299146	0.241161	-0.0579853	hypomethylation	0.00112892	0.00632346
cg06728252	0.65498	0.757933	0.102953	hypermethylation	0.0017302	0.0074629
cg06731572	0.767072	0.715853	-0.0512197	hypomethylation	0.0142437	0.0215347
cg06743973	0.603322	0.546808	-0.0565139	hypomethylation	0.0169129	0.0241285
cg06745968	0.920175	0.858295	-0.0618799	hypomethylation	0.00902794	0.0162231
cg06749803	0.298914	0.384061	0.085147	hypermethylation	0.00138264	0.00690459
cg06756372	0.711318	0.658174	-0.053144	hypomethylation	0.040278	0.044945
cg06758191	0.977257	0.90682	-0.0704368	hypomethylation	0.0375321	0.0425434
cg06760111	0.377394	0.316359	-0.0610351	hypomethylation	0.0117058	0.0190054
cg06763522	0.615412	0.555942	-0.0594706	hypomethylation	0.00690932	0.0138458
cg06770878	0.582111	0.528044	-0.054067	hypomethylation	0.00318243	0.00945951
cg06776159	0.797617	0.740868	-0.0567495	hypomethylation	0.0272488	0.0336437
cg06781608	0.724034	0.670238	-0.053796	hypomethylation	0.0055365	0.0124401
cg06782606	0.521146	0.470824	-0.0503219	hypomethylation	0.00370134	0.010149
cg06789194	0.870941	0.815801	-0.0551392	hypomethylation	0.00530704	0.0122217
cg06800545	0.541843	0.491195	-0.0506478	hypomethylation	0.0333867	0.0389153
cg06803706	0.454498	0.398294	-0.0562043	hypomethylation	0.00920272	0.0164632
cg06808305	0.678911	0.627746	-0.051165	hypomethylation	0.0208065	0.0277173
cg06815731	0.884401	0.833102	-0.0512994	hypomethylation	0.0278803	0.034177
cg06816651	0.4077	0.355575	-0.0521255	hypomethylation	0.00814898	0.015296
cg06820364	0.904157	0.853699	-0.0504581	hypomethylation	0.00245445	0.00849431
cg06827397	0.294947	0.231038	-0.0639092	hypomethylation	0.0203549	0.0272974
cg06832677	0.396405	0.343036	-0.0533693	hypomethylation	0.00396472	0.0104686
cg06836032	0.726343	0.669188	-0.057155	hypomethylation	0.0120392	0.0193393
cg06836380	0.468196	0.414917	-0.0532785	hypomethylation	0.0380389	0.0430133
cg06847429	0.923433	0.868559	-0.0548747	hypomethylation	0.0149767	0.0222248
cg06847624	0.50175	0.561814	0.0600644	hypermethylation	0.0422891	0.0466888
cg06850787	0.748386	0.834713	0.0863268	hypermethylation	0.00223466	0.00818873
cg06857441	0.688542	0.623083	-0.065459	hypomethylation	0.0160996	0.0233031
cg06862636	0.517852	0.449178	-0.0686742	hypomethylation	0.00526565	0.0121844
cg06867361	0.343663	0.290367	-0.0532955	hypomethylation	0.00971382	0.0169977
cg06871323	0.766422	0.672736	-0.0936862	hypomethylation	0.00586212	0.0128021
cg06872599	0.534536	0.468435	-0.0661011	hypomethylation	0.0254895	0.0320434
cg06879998	0.740928	0.684503	-0.0564254	hypomethylation	0.0309687	0.0370123
cg06897687	0.54153	0.488139	-0.0533911	hypomethylation	0.0177064	0.0248582
cg06905720	0.366927	0.310922	-0.0560053	hypomethylation	0.0278881	0.034177
cg06924548	0.246681	0.194206	-0.0524756	hypomethylation	0.00768508	0.0147717
cg06925185	0.827985	0.753869	-0.0741168	hypomethylation	0.00011758	0.00310756
cg06928346	0.319161	0.386888	0.0677272	hypermethylation	0.000125465	0.00318127
cg06931065	0.389072	0.337385	-0.051687	hypomethylation	0.0303679	0.0364315
cg06931941	0.46036	0.511901	0.0515417	hypermethylation	0.00531914	0.0122344
cg06945179	0.869434	0.803586	-0.0658479	hypomethylation	0.000176012	0.00350402
cg06945504	0.797938	0.8485	0.0505622	hypermethylation	0.0113759	0.0186906
cg06947608	0.559539	0.433428	-0.126111	hypomethylation	2.21031e-06	0.00057795
cg06957867	0.919246	0.868085	-0.0511617	hypomethylation	0.00148088	0.00708878
cg06961429	0.783642	0.719442	-0.0642002	hypomethylation	0.00463045	0.0114155
cg06965839	0.525834	0.466683	-0.0591509	hypomethylation	0.0225689	0.0293464
cg06971577	0.640671	0.589744	-0.0509263	hypomethylation	0.0135205	0.0208088
cg06981636	0.515551	0.452965	-0.0625863	hypomethylation	0.0421501	0.0465905
cg06984463	0.303335	0.249496	-0.0538388	hypomethylation	0.0390863	0.0439055
cg06986743	0.661695	0.56217	-0.0995241	hypomethylation	0.0174709	0.0246511
cg06986837	0.65194	0.599518	-0.0524216	hypomethylation	0.0411685	0.0457219
cg06993144	0.349877	0.283864	-0.0660132	hypomethylation	0.00820045	0.0153618
cg06994786	0.949308	0.895605	-0.0537037	hypomethylation	0.00517745	0.0120621
cg07000567	0.607414	0.544192	-0.0632225	hypomethylation	1.80683e-05	0.00163285
cg07003334	0.892845	0.83188	-0.0609655	hypomethylation	0.00335494	0.00973715
cg07003993	0.468466	0.395981	-0.0724844	hypomethylation	0.000167518	0.00350187
cg07006249	0.475309	0.390132	-0.0851767	hypomethylation	0.00675673	0.0136671
cg07008343	0.713872	0.651847	-0.0620253	hypomethylation	0.00626924	0.0132176
cg07009371	0.545288	0.479768	-0.0655196	hypomethylation	0.00955218	0.0168523
cg07015465	0.920387	0.866009	-0.0543779	hypomethylation	0.00291156	0.00904696
cg07016075	0.542845	0.488942	-0.0539021	hypomethylation	0.00851081	0.0157224
cg07016145	0.588338	0.53183	-0.0565079	hypomethylation	0.0368772	0.041988
cg07016288	0.877609	0.81793	-0.0596789	hypomethylation	0.0100934	0.0174423
cg07016546	0.775282	0.712895	-0.0623874	hypomethylation	0.0437724	0.0479954
cg07019386	0.764599	0.659446	-0.105153	hypomethylation	0.000199472	0.00352963
cg07026430	0.716985	0.643887	-0.0730982	hypomethylation	0.00454686	0.0112976
cg07031888	0.621593	0.561537	-0.0600558	hypomethylation	0.00555111	0.0124457
cg07036786	0.569656	0.494188	-0.0754682	hypomethylation	0.00134517	0.00685334
cg07038243	0.4742	0.386594	-0.0876054	hypomethylation	0.000632783	0.0051916
cg07039560	0.615419	0.688204	0.0727853	hypermethylation	0.004054	0.0106143
cg07046120	0.591359	0.537508	-0.0538513	hypomethylation	0.00241064	0.00842596
cg07052231	0.529864	0.463578	-0.0662852	hypomethylation	0.00188648	0.00768799
cg07054208	0.363275	0.306258	-0.0570179	hypomethylation	0.00786683	0.014967
cg07064231	0.919025	0.863556	-0.0554686	hypomethylation	0.00157518	0.00723579
cg07070113	0.751088	0.695266	-0.0558216	hypomethylation	0.00664288	0.0135642
cg07071036	0.273584	0.221378	-0.0522059	hypomethylation	0.00061486	0.00514957
cg07074575	0.31873	0.232464	-0.0862665	hypomethylation	0.000310226	0.00414967
cg07076816	0.148825	0.235897	0.087072	hypermethylation	0.00303335	0.00923788
cg07095347	0.287142	0.235353	-0.0517897	hypomethylation	0.0136207	0.0209056
cg07095969	0.317414	0.264511	-0.0529023	hypomethylation	0.0112092	0.0185594
cg07120200	0.486537	0.432988	-0.0535493	hypomethylation	0.0346264	0.0399201
cg07123846	0.398577	0.34705	-0.0515267	hypomethylation	0.00797462	0.015085
cg07124234	0.91578	0.848405	-0.0673752	hypomethylation	0.0017986	0.00757101
cg07126798	0.474662	0.40132	-0.0733425	hypomethylation	0.000183694	0.00352963
cg07127047	0.718926	0.644152	-0.0747748	hypomethylation	0.00126642	0.00666267
cg07128846	0.759969	0.706193	-0.0537766	hypomethylation	0.0371441	0.0422061
cg07131958	0.335854	0.284	-0.051854	hypomethylation	0.00612569	0.0130751
cg07136108	0.182701	0.244423	0.0617223	hypermethylation	0.00493633	0.0117178
cg07138399	0.690355	0.760721	0.0703657	hypermethylation	0.0251563	0.0317457
cg07139329	0.408718	0.336853	-0.0718648	hypomethylation	0.00158844	0.00723579
cg07147520	0.806499	0.750318	-0.0561811	hypomethylation	0.00355527	0.00995347
cg07149347	0.530412	0.466222	-0.0641896	hypomethylation	0.00893627	0.016136
cg07161968	0.770586	0.70605	-0.0645358	hypomethylation	0.00363101	0.0100467
cg07164487	0.842921	0.768734	-0.0741869	hypomethylation	0.00211093	0.00799145
cg07167324	0.615938	0.548476	-0.0674613	hypomethylation	0.00856555	0.015759
cg07170092	0.780982	0.697614	-0.083368	hypomethylation	5.11382e-05	0.00247409
cg07175647	0.403575	0.348543	-0.0550311	hypomethylation	0.00527478	0.0121875
cg07184032	0.217819	0.136884	-0.0809349	hypomethylation	1.57685e-05	0.00147251
cg07186962	0.327989	0.275374	-0.0526157	hypomethylation	0.00145344	0.00707585
cg07188009	0.443533	0.373834	-0.0696999	hypomethylation	0.00630056	0.0132177
cg07190378	0.637536	0.570602	-0.0669337	hypomethylation	0.0336188	0.0391169
cg07192082	0.444956	0.387798	-0.0571582	hypomethylation	0.0271123	0.0335417
cg07197752	0.318032	0.252005	-0.0660274	hypomethylation	0.00552996	0.0124389
cg07199535	0.407885	0.356917	-0.050968	hypomethylation	0.00672447	0.0136403
cg07200871	0.865011	0.92356	0.0585488	hypermethylation	0.016695	0.0239144
cg07201475	0.385703	0.306745	-0.0789579	hypomethylation	0.00303776	0.00924528
cg07201976	0.24384	0.19152	-0.0523199	hypomethylation	0.00778909	0.0148714
cg07202054	0.465706	0.411786	-0.0539196	hypomethylation	0.011382	0.0186906
cg07203024	0.71627	0.660213	-0.056057	hypomethylation	0.000416868	0.00452777
cg07210187	0.866892	0.797994	-0.0688983	hypomethylation	0.00234672	0.00836845
cg07212142	0.798791	0.746698	-0.0520928	hypomethylation	0.0320309	0.0378458
cg07216976	0.183926	0.108093	-0.0758334	hypomethylation	0.00375441	0.0102265
cg07233316	0.596387	0.530594	-0.0657934	hypomethylation	0.00655401	0.0134464
cg07234876	0.757128	0.888268	0.13114	hypermethylation	0.00134914	0.00685334
cg07240190	0.855045	0.804825	-0.0502204	hypomethylation	0.0273416	0.0337153
cg07240206	0.268787	0.21361	-0.0551769	hypomethylation	0.00263002	0.00867334
cg07244927	0.518623	0.468024	-0.050599	hypomethylation	0.0317519	0.0376043
cg07249742	0.885331	0.82909	-0.0562418	hypomethylation	0.00132704	0.00684657
cg07249860	0.927361	0.864839	-0.0625213	hypomethylation	0.00227659	0.00827752
cg07261569	0.740116	0.678999	-0.0611175	hypomethylation	0.00747398	0.0145103
cg07262842	0.297867	0.233277	-0.0645903	hypomethylation	0.00106158	0.00622169
cg07265477	0.287205	0.223181	-0.0640235	hypomethylation	0.0075528	0.0146055
cg07268048	0.447567	0.394641	-0.0529266	hypomethylation	0.0447058	0.0488278
cg07277549	0.457046	0.4054	-0.0516457	hypomethylation	0.0235698	0.0302062
cg07278718	0.274113	0.223925	-0.0501882	hypomethylation	0.00159939	0.00726072
cg07280097	0.400039	0.345391	-0.0546483	hypomethylation	0.00225907	0.00823864
cg07287793	0.645713	0.583618	-0.0620946	hypomethylation	1.37384e-05	0.00139956
cg07292612	0.697614	0.760475	0.0628611	hypermethylation	0.0339771	0.0393822
cg07305537	0.540208	0.484291	-0.0559172	hypomethylation	0.0389033	0.0437631
cg07311956	0.308871	0.242742	-0.0661295	hypomethylation	0.000327406	0.00414967
cg07334009	0.949298	0.898366	-0.0509319	hypomethylation	0.0299347	0.0360387
cg07334154	0.913549	0.862286	-0.0512628	hypomethylation	0.000935278	0.00594212
cg07336438	0.411434	0.328424	-0.0830101	hypomethylation	0.00258918	0.00863915
cg07342559	0.62298	0.572319	-0.0506611	hypomethylation	0.0143386	0.0215986
cg07346187	0.27466	0.22376	-0.0509008	hypomethylation	0.00236764	0.00838023
cg07349477	0.391463	0.338479	-0.0529844	hypomethylation	0.0359129	0.0411829
cg07351681	0.906475	0.856132	-0.0503431	hypomethylation	0.0160281	0.0232195
cg07357091	0.295047	0.350407	0.0553599	hypermethylation	0.00266157	0.00870821
cg07358373	0.580916	0.524749	-0.0561666	hypomethylation	0.000638883	0.0051916
cg07366660	0.301573	0.250238	-0.0513345	hypomethylation	0.00701557	0.0139391
cg07378350	0.647263	0.587414	-0.0598485	hypomethylation	0.018042	0.0251917
cg07382842	0.503003	0.451363	-0.0516404	hypomethylation	0.0401061	0.0447995
cg07384080	0.550534	0.490827	-0.0597071	hypomethylation	0.00287888	0.00900133
cg07388493	0.454689	0.398151	-0.0565379	hypomethylation	0.00315265	0.0094009
cg07392385	0.679885	0.62029	-0.0595956	hypomethylation	0.0450962	0.0491583
cg07395826	0.413224	0.362475	-0.0507496	hypomethylation	0.00650481	0.0134194
cg07402062	0.473519	0.405606	-0.0679131	hypomethylation	0.00917468	0.0164287
cg07403525	0.486346	0.423143	-0.0632034	hypomethylation	0.0134446	0.0207236
cg07403865	0.23139	0.293126	0.0617352	hypermethylation	0.00618965	0.013152
cg07409383	0.40204	0.343074	-0.058966	hypomethylation	0.00653459	0.0134311
cg07411532	0.419128	0.363115	-0.0560131	hypomethylation	8.61588e-05	0.00284303
cg07418777	0.887551	0.805121	-0.0824306	hypomethylation	0.00997181	0.0173086
cg07421015	0.236775	0.186599	-0.0501755	hypomethylation	0.000753714	0.00544803
cg07423149	0.473182	0.422461	-0.0507208	hypomethylation	0.0219276	0.0288202
cg07437919	0.403939	0.298761	-0.105179	hypomethylation	9.38818e-07	0.000328762
cg07464821	0.787505	0.733083	-0.0544224	hypomethylation	0.0239878	0.0306438
cg07465864	0.313056	0.240701	-0.0723546	hypomethylation	0.00150046	0.00710656
cg07470512	0.115559	0.0642601	-0.0512994	hypomethylation	0.0296894	0.0358126
cg07473103	0.874856	0.816304	-0.0585517	hypomethylation	0.00155657	0.00723579
cg07475922	0.235423	0.167497	-0.0679266	hypomethylation	0.000260299	0.00392057
cg07479270	0.957887	0.874353	-0.0835332	hypomethylation	0.03237	0.0381028
cg07480006	0.267244	0.214395	-0.0528488	hypomethylation	0.00207366	0.00792005
cg07509935	0.104753	0.162046	0.0572928	hypermethylation	0.00878653	0.0160072
cg07518449	0.448143	0.383411	-0.0647322	hypomethylation	0.0343826	0.039729
cg07520074	0.806879	0.709944	-0.0969346	hypomethylation	0.0105638	0.0178764
cg07522661	0.822469	0.762311	-0.0601576	hypomethylation	0.0121749	0.0194514
cg07526328	0.688101	0.576645	-0.111456	hypomethylation	0.000223123	0.00364242
cg07530460	0.888742	0.962124	0.0733818	hypermethylation	0.0169421	0.0241544
cg07530626	0.651496	0.601078	-0.0504177	hypomethylation	0.0309812	0.0370123
cg07531663	0.392994	0.332597	-0.060397	hypomethylation	0.0422648	0.0466711
cg07533951	0.185455	0.134805	-0.05065	hypomethylation	0.0077807	0.0148637
cg07539990	0.286214	0.235001	-0.0512132	hypomethylation	0.00214118	0.00805168
cg07549449	0.537319	0.480681	-0.0566378	hypomethylation	0.0124228	0.0197014
cg07552723	0.898022	0.82529	-0.0727318	hypomethylation	0.00339341	0.00976076
cg07569216	0.275573	0.217056	-0.0585172	hypomethylation	0.00907703	0.0162852
cg07571531	0.497286	0.434372	-0.062914	hypomethylation	0.0385862	0.043478
cg07575970	0.872791	0.786423	-0.0863679	hypomethylation	0.00173938	0.00747946
cg07577294	0.942543	0.892535	-0.0500084	hypomethylation	0.0173688	0.0245751
cg07582993	0.667283	0.725253	0.0579707	hypermethylation	0.002119	0.00800051
cg07583848	0.876775	0.820949	-0.0558259	hypomethylation	0.000862247	0.00573359
cg07601816	0.845005	0.785263	-0.059742	hypomethylation	0.00808618	0.0152138
cg07605826	0.77607	0.723394	-0.052676	hypomethylation	0.00309622	0.00931194
cg07610825	0.904854	0.836202	-0.068652	hypomethylation	0.000926612	0.00591996
cg07616943	0.348051	0.293493	-0.0545579	hypomethylation	0.0118093	0.0190849
cg07617736	0.326883	0.253413	-0.07347	hypomethylation	0.000799252	0.00554234
cg07620838	0.900242	0.840159	-0.0600832	hypomethylation	0.00716525	0.0141064
cg07633530	0.66115	0.597805	-0.0633449	hypomethylation	0.0174278	0.0246246
cg07636145	0.212172	0.150215	-0.0619572	hypomethylation	9.53084e-05	0.00287104
cg07641662	0.200248	0.129087	-0.0711605	hypomethylation	3.59156e-07	0.000198165
cg07646260	0.519545	0.465486	-0.0540589	hypomethylation	0.0298466	0.0359404
cg07648405	0.476996	0.425603	-0.0513935	hypomethylation	0.000703291	0.00532624
cg07648456	0.50327	0.567806	0.0645366	hypermethylation	0.0126668	0.0199584
cg07651624	0.704949	0.757765	0.0528153	hypermethylation	0.0311469	0.0371469
cg07655227	0.23888	0.18752	-0.05136	hypomethylation	0.00193832	0.00774087
cg07659053	0.853583	0.729855	-0.123728	hypomethylation	0.0107486	0.0180635
cg07661882	0.434176	0.382766	-0.0514095	hypomethylation	0.0265847	0.0330755
cg07670421	0.855786	0.794389	-0.0613978	hypomethylation	0.00110048	0.0062834
cg07672814	0.318405	0.254015	-0.06439	hypomethylation	0.0365452	0.0417238
cg07686834	0.89309	0.835082	-0.0580083	hypomethylation	0.0157276	0.0229245
cg07686953	0.225765	0.175282	-0.0504829	hypomethylation	0.00148918	0.00710584
cg07694864	0.14522	0.195526	0.0503058	hypermethylation	0.029127	0.0352709
cg07697265	0.904334	0.852047	-0.0522876	hypomethylation	0.000456835	0.00463161
cg07709791	0.916617	0.861488	-0.0551292	hypomethylation	0.00489779	0.0116808
cg07710094	0.625977	0.573949	-0.0520275	hypomethylation	0.0120855	0.0193734
cg07716131	0.316314	0.264329	-0.051985	hypomethylation	0.00270405	0.00875261
cg07716696	0.322182	0.262357	-0.0598255	hypomethylation	0.0147496	0.0220369
cg07718431	0.574434	0.674699	0.100265	hypermethylation	0.0404411	0.0450928
cg07723198	0.917389	0.867159	-0.0502301	hypomethylation	0.00148488	0.00709878
cg07724074	0.738533	0.791979	0.0534464	hypermethylation	0.0060017	0.0129487
cg07732626	0.337498	0.283094	-0.0544041	hypomethylation	0.0178373	0.0250043
cg07738651	0.460698	0.395537	-0.0651607	hypomethylation	0.00272907	0.00877578
cg07738730	0.581775	0.520177	-0.0615975	hypomethylation	0.0281938	0.0344651
cg07744502	0.298884	0.248863	-0.0500212	hypomethylation	0.00169712	0.00739796
cg07744547	0.759552	0.817058	0.0575068	hypermethylation	0.0211739	0.0280466
cg07745166	0.335636	0.282855	-0.0527804	hypomethylation	0.0164618	0.0236866
cg07748963	0.316207	0.179559	-0.136648	hypomethylation	0.0309752	0.0370123
cg07757535	0.354457	0.300041	-0.0544165	hypomethylation	0.00423617	0.0108628
cg07776931	0.623489	0.551763	-0.0717257	hypomethylation	0.00862254	0.0158141
cg07778935	0.472757	0.414523	-0.0582344	hypomethylation	0.0134527	0.0207303
cg07785144	0.765398	0.714903	-0.050495	hypomethylation	0.0121391	0.0194219
cg07787354	0.741956	0.633074	-0.108882	hypomethylation	3.89044e-07	0.000198165
cg07791547	0.250345	0.191353	-0.0589922	hypomethylation	6.44098e-05	0.0027373
cg07792387	0.76156	0.704574	-0.056986	hypomethylation	0.00140428	0.006963
cg07793898	0.646789	0.591341	-0.0554481	hypomethylation	0.00236494	0.00837594
cg07797372	0.456794	0.40353	-0.0532638	hypomethylation	0.025891	0.0324318
cg07800040	0.874616	0.81971	-0.0549059	hypomethylation	0.0111972	0.018556
cg07800627	0.607381	0.552173	-0.0552076	hypomethylation	0.0011749	0.00641133
cg07802401	0.680454	0.742789	0.0623351	hypermethylation	0.0366723	0.0418141
cg07806533	0.863327	0.81238	-0.050947	hypomethylation	0.00157988	0.00723579
cg07814289	0.110409	0.164755	0.0543453	hypermethylation	0.0404541	0.0450984
cg07816439	0.620265	0.568786	-0.0514792	hypomethylation	0.00122992	0.00658819
cg07820189	0.519599	0.456336	-0.0632631	hypomethylation	0.00112707	0.00632132
cg07824483	0.432168	0.382159	-0.0500088	hypomethylation	0.0079859	0.0151012
cg07830218	0.502785	0.446863	-0.0559223	hypomethylation	0.0297971	0.0359025
cg07832177	0.693895	0.642473	-0.0514212	hypomethylation	0.0122167	0.0195014
cg07832772	0.501313	0.436506	-0.0648072	hypomethylation	0.00840332	0.0155855
cg07839627	0.56354	0.508552	-0.0549881	hypomethylation	4.03983e-05	0.00215573
cg07848310	0.202026	0.325353	0.123327	hypermethylation	0.00671572	0.0136383
cg07856155	0.468423	0.410821	-0.0576024	hypomethylation	0.00467466	0.0114626
cg07861198	0.523597	0.46765	-0.0559469	hypomethylation	0.0153574	0.0226084
cg07865216	0.569227	0.512119	-0.0571082	hypomethylation	0.0122204	0.0195018
cg07872305	0.60807	0.517213	-0.0908565	hypomethylation	0.0311089	0.0371174
cg07876131	0.414218	0.357637	-0.056581	hypomethylation	0.0148335	0.0220808
cg07876788	0.558136	0.487361	-0.0707752	hypomethylation	0.0296464	0.0357839
cg07878514	0.293868	0.238533	-0.0553349	hypomethylation	0.003412	0.00978375
cg07883894	0.394655	0.301113	-0.0935419	hypomethylation	0.00016582	0.00350187
cg07884197	0.315878	0.265646	-0.0502321	hypomethylation	0.00605821	0.0129985
cg07894089	0.274435	0.221399	-0.053036	hypomethylation	0.00182454	0.00762356
cg07899016	0.459297	0.402672	-0.0566245	hypomethylation	0.0238275	0.030446
cg07899896	0.475189	0.402279	-0.0729094	hypomethylation	0.0316722	0.0375417
cg07903036	0.22874	0.177746	-0.0509941	hypomethylation	0.00285708	0.00896398
cg07904051	0.579783	0.521515	-0.0582681	hypomethylation	0.00660551	0.0135125
cg07904751	0.755145	0.806025	0.0508791	hypermethylation	0.00261843	0.00866486
cg07908903	0.316077	0.265895	-0.0501818	hypomethylation	0.00490956	0.0116808
cg07914029	0.563557	0.502448	-0.0611093	hypomethylation	0.000638702	0.0051916
cg07915546	0.443663	0.373802	-0.0698615	hypomethylation	0.00505686	0.0118799
cg07918341	0.784795	0.720726	-0.0640696	hypomethylation	0.00621892	0.0131787
cg07925670	0.445516	0.374858	-0.0706575	hypomethylation	0.002687	0.00871718
cg07927540	0.349759	0.290947	-0.0588123	hypomethylation	0.0249648	0.0315866
cg07943849	0.811518	0.759893	-0.0516255	hypomethylation	0.0167681	0.0239734
cg07950265	0.946408	0.892645	-0.0537629	hypomethylation	0.000751822	0.00544803
cg07953867	0.489421	0.364155	-0.125267	hypomethylation	0.000326801	0.00414967
cg07955367	0.845594	0.761042	-0.0845519	hypomethylation	0.00204204	0.00788925
cg07958387	0.286709	0.234706	-0.0520027	hypomethylation	0.000936443	0.00594212
cg07958898	0.453006	0.401982	-0.051024	hypomethylation	0.00125761	0.00664189
cg07960232	0.46918	0.418756	-0.0504236	hypomethylation	0.0146251	0.0218928
cg07968760	0.415	0.484089	0.0690896	hypermethylation	0.0332158	0.0387806
cg07971797	0.807316	0.74026	-0.0670558	hypomethylation	0.0128294	0.0201229
cg07972427	0.652493	0.596302	-0.056191	hypomethylation	0.0231942	0.0298596
cg07976695	0.27092	0.218962	-0.0519579	hypomethylation	0.000649695	0.0051916
cg07978718	0.4575	0.381399	-0.0761006	hypomethylation	0.0252311	0.0318115
cg08005462	0.248675	0.197307	-0.0513673	hypomethylation	0.0086017	0.0157914
cg08008072	0.28447	0.231983	-0.0524873	hypomethylation	0.0251634	0.0317475
cg08009458	0.934076	0.877097	-0.0569793	hypomethylation	0.00247543	0.00852891
cg08011436	0.409605	0.351594	-0.0580109	hypomethylation	0.0401373	0.0448255
cg08024896	0.252428	0.312013	0.0595845	hypermethylation	0.0268533	0.0333071
cg08025191	0.545795	0.492284	-0.0535108	hypomethylation	0.0447145	0.0488278
cg08027238	0.880356	0.808376	-0.0719804	hypomethylation	0.00129765	0.00676167
cg08032483	0.848334	0.788984	-0.0593494	hypomethylation	6.1482e-05	0.0027373
cg08034157	0.515869	0.457081	-0.0587889	hypomethylation	0.00216698	0.00810218
cg08035323	0.329439	0.260094	-0.0693456	hypomethylation	0.000501968	0.00480981
cg08036078	0.297105	0.245624	-0.0514808	hypomethylation	0.000898269	0.00582624
cg08038974	0.381863	0.3255	-0.0563632	hypomethylation	0.000197822	0.00352963
cg08047401	0.927231	0.876957	-0.0502734	hypomethylation	0.00216613	0.00810218
cg08054150	0.712147	0.650809	-0.0613379	hypomethylation	0.020012	0.0269832
cg08071142	0.670683	0.604005	-0.0666778	hypomethylation	0.00261417	0.00866486
cg08074480	0.573924	0.517022	-0.0569027	hypomethylation	0.00475319	0.0115629
cg08076044	0.224167	0.161007	-0.0631599	hypomethylation	0.00839672	0.0155836
cg08078339	0.906183	0.839236	-0.066947	hypomethylation	0.000814815	0.00560173
cg08088390	0.723214	0.667675	-0.055539	hypomethylation	0.0428715	0.0472108
cg08091771	0.691563	0.636715	-0.054848	hypomethylation	0.00172485	0.00745704
cg08094349	0.478664	0.389862	-0.0888016	hypomethylation	0.00087832	0.00576417
cg08096851	0.246679	0.182356	-0.0643224	hypomethylation	0.00016051	0.0034541
cg08106415	0.373197	0.313034	-0.0601629	hypomethylation	0.00969883	0.0169977
cg08109808	0.593956	0.541219	-0.0527367	hypomethylation	0.0344323	0.0397536
cg08118114	0.552745	0.618092	0.0653476	hypermethylation	0.0129329	0.0202128
cg08121160	0.313222	0.259754	-0.0534678	hypomethylation	0.00175796	0.0074886
cg08126118	0.362896	0.312013	-0.0508826	hypomethylation	0.00720782	0.0141505
cg08130071	0.478421	0.537123	0.0587025	hypermethylation	0.0163031	0.0235186
cg08131086	0.748645	0.690106	-0.0585394	hypomethylation	0.043761	0.0479923
cg08133496	0.398166	0.314742	-0.083424	hypomethylation	5.29931e-07	0.0002284
cg08141199	0.301955	0.251935	-0.0500199	hypomethylation	0.00286797	0.00897724
cg08148802	0.501609	0.447348	-0.0542614	hypomethylation	0.00480025	0.011593
cg08149328	0.150413	0.0910623	-0.0593511	hypomethylation	0.0141976	0.0214823
cg08151442	0.634694	0.584366	-0.050328	hypomethylation	0.00720458	0.0141491
cg08155312	0.875474	0.823068	-0.0524063	hypomethylation	0.0179846	0.0251354
cg08159594	0.432065	0.380667	-0.0513981	hypomethylation	0.0101129	0.0174544
cg08160072	0.398679	0.344224	-0.0544548	hypomethylation	0.00660395	0.0135125
cg08161205	0.884911	0.833388	-0.051523	hypomethylation	0.00974117	0.0170349
cg08166588	0.602579	0.53267	-0.0699098	hypomethylation	0.00107294	0.00626058
cg08173263	0.344782	0.294343	-0.050439	hypomethylation	0.00646485	0.0133811
cg08173439	0.605385	0.543584	-0.0618012	hypomethylation	0.00644813	0.0133613
cg08173730	0.663488	0.602376	-0.0611118	hypomethylation	0.0160497	0.0232368
cg08180998	0.899242	0.837647	-0.0615946	hypomethylation	0.00523026	0.0121296
cg08185591	0.594396	0.537769	-0.0566272	hypomethylation	0.026132	0.0326461
cg08190562	0.923315	0.870341	-0.0529738	hypomethylation	0.00212214	0.00800696
cg08198377	0.315367	0.261298	-0.0540683	hypomethylation	0.00851536	0.0157256
cg08211195	0.831266	0.779336	-0.0519309	hypomethylation	0.0228476	0.0295715
cg08213398	0.663672	0.609259	-0.0544132	hypomethylation	0.0140177	0.0213137
cg08223887	0.599059	0.54272	-0.0563384	hypomethylation	0.0438746	0.0480604
cg08225155	0.913498	0.848479	-0.0650198	hypomethylation	0.000197411	0.00352963
cg08226047	0.673513	0.610086	-0.0634273	hypomethylation	0.004759	0.0115629
cg08228850	0.499939	0.424476	-0.075463	hypomethylation	0.0134286	0.020716
cg08232909	0.554057	0.500217	-0.05384	hypomethylation	0.0282417	0.0345122
cg08240917	0.904112	0.728688	-0.175424	hypomethylation	0.0020705	0.00792005
cg08243951	0.876828	0.826388	-0.0504403	hypomethylation	0.00240016	0.00842084
cg08253808	0.386342	0.32616	-0.060182	hypomethylation	0.00339077	0.00976076
cg08254359	0.302836	0.231378	-0.0714583	hypomethylation	0.00808547	0.0152138
cg08264279	0.449065	0.377863	-0.0712022	hypomethylation	0.000563645	0.00501286
cg08264839	0.323379	0.270382	-0.0529972	hypomethylation	0.00242534	0.00844856
cg08265451	0.831239	0.77157	-0.0596691	hypomethylation	0.00181989	0.00761529
cg08265769	0.365855	0.30346	-0.0623953	hypomethylation	0.0149972	0.0222359
cg08276645	0.586499	0.527491	-0.0590081	hypomethylation	0.0309659	0.0370123
cg08285289	0.330996	0.26591	-0.0650852	hypomethylation	0.00332023	0.00967407
cg08290471	0.830179	0.756727	-0.0734512	hypomethylation	0.00670335	0.013633
cg08291342	0.29308	0.232764	-0.0603162	hypomethylation	0.00025753	0.00389984
cg08325413	0.834847	0.779547	-0.0553003	hypomethylation	0.00449258	0.0112376
cg08325662	0.587898	0.53567	-0.0522287	hypomethylation	0.0216643	0.0285529
cg08327744	0.456635	0.402503	-0.0541317	hypomethylation	0.000529743	0.00488183
cg08328067	0.557662	0.496839	-0.0608227	hypomethylation	0.0262754	0.0327521
cg08335497	0.932173	0.87848	-0.0536933	hypomethylation	0.0305453	0.0366125
cg08350889	0.364853	0.29518	-0.0696736	hypomethylation	0.00735332	0.0143506
cg08362102	0.235133	0.184379	-0.0507546	hypomethylation	0.0038169	0.0102768
cg08364510	0.425708	0.353275	-0.0724333	hypomethylation	0.000465724	0.00466807
cg08369164	0.485475	0.434977	-0.0504982	hypomethylation	0.043117	0.0474079
cg08371951	0.518824	0.462643	-0.0561808	hypomethylation	0.00641089	0.0133146
cg08381620	0.411756	0.34391	-0.0678462	hypomethylation	0.00927014	0.0165311
cg08384611	0.420569	0.36619	-0.0543783	hypomethylation	0.0335477	0.0390704
cg08388182	0.58916	0.534884	-0.0542753	hypomethylation	0.00687156	0.0137998
cg08393008	0.795229	0.743162	-0.0520667	hypomethylation	0.00651931	0.0134194
cg08408040	0.0744297	0.138042	0.0636122	hypermethylation	0.0416542	0.0460969
cg08410918	0.302879	0.24878	-0.0540988	hypomethylation	0.000214533	0.00358815
cg08415138	0.346657	0.296004	-0.0506529	hypomethylation	0.00760034	0.0146692
cg08419053	0.939988	0.887399	-0.0525887	hypomethylation	6.93423e-05	0.0027408
cg08424491	0.492802	0.430793	-0.0620089	hypomethylation	0.0315157	0.0374115
cg08430157	0.84797	0.780792	-0.0671787	hypomethylation	0.0110653	0.0184301
cg08430986	0.624695	0.571664	-0.0530307	hypomethylation	0.0131283	0.020388
cg08435853	0.814525	0.754257	-0.060268	hypomethylation	0.00887224	0.016093
cg08446860	0.3428	0.28054	-0.06226	hypomethylation	0.0150132	0.0222478
cg08460875	0.724049	0.653861	-0.0701884	hypomethylation	0.00064484	0.0051916
cg08463173	0.835446	0.785065	-0.0503813	hypomethylation	0.0107161	0.0180308
cg08470252	0.66945	0.596887	-0.0725627	hypomethylation	0.00449264	0.0112376
cg08471298	0.555208	0.498875	-0.0563323	hypomethylation	0.00278496	0.00883085
cg08473764	0.821145	0.894821	0.0736764	hypermethylation	6.94287e-05	0.0027408
cg08483768	0.562298	0.485742	-0.0765558	hypomethylation	0.000345187	0.00422707
cg08485488	0.778099	0.713837	-0.064262	hypomethylation	0.000483498	0.00476473
cg08486986	0.46968	0.550011	0.0803306	hypermethylation	0.0125712	0.0198565
cg08490751	0.44297	0.512928	0.0699575	hypermethylation	0.0389049	0.0437631
cg08508325	0.261484	0.199912	-0.0615721	hypomethylation	0.000835226	0.00566558
cg08514053	0.710726	0.646538	-0.0641873	hypomethylation	0.00096721	0.00598078
cg08514417	0.918122	0.865623	-0.0524988	hypomethylation	0.00463777	0.0114176
cg08516212	0.754081	0.822873	0.0687926	hypermethylation	0.0359982	0.041247
cg08519290	0.465785	0.415599	-0.050187	hypomethylation	0.0209598	0.0278224
cg08525145	0.349013	0.292297	-0.0567158	hypomethylation	0.000567053	0.00501774
cg08526796	0.439193	0.382708	-0.0564851	hypomethylation	0.000665518	0.00523488
cg08530008	0.753041	0.696589	-0.0564522	hypomethylation	0.00420813	0.0108356
cg08535604	0.270243	0.200575	-0.0696685	hypomethylation	0.0080988	0.0152325
cg08538491	0.621027	0.570033	-0.0509945	hypomethylation	0.00438212	0.01105
cg08543530	0.29927	0.248959	-0.0503114	hypomethylation	0.0215864	0.0284884
cg08545389	0.198665	0.146371	-0.0522935	hypomethylation	0.000342663	0.0042104
cg08560544	0.692773	0.638291	-0.0544821	hypomethylation	0.0424058	0.0467992
cg08563318	0.705711	0.636371	-0.0693399	hypomethylation	0.00958071	0.0168822
cg08584845	0.327114	0.262819	-0.064295	hypomethylation	0.0219422	0.0288258
cg08585897	0.813171	0.748037	-0.0651335	hypomethylation	0.00140985	0.00696596
cg08587864	0.599601	0.542496	-0.0571054	hypomethylation	0.0102108	0.0175601
cg08593031	0.358033	0.307459	-0.0505735	hypomethylation	0.0103306	0.0176579
cg08594019	0.762821	0.711061	-0.0517603	hypomethylation	0.0179051	0.025068
cg08601984	0.927002	0.866791	-0.0602107	hypomethylation	0.00525008	0.0121705
cg08602500	0.368234	0.312468	-0.0557655	hypomethylation	0.00557278	0.0124499
cg08611402	0.947339	0.885459	-0.0618805	hypomethylation	0.000249808	0.00384918
cg08633479	0.639258	0.709064	0.0698053	hypermethylation	0.0160294	0.0232195
cg08636145	0.158141	0.224671	0.0665293	hypermethylation	0.00893017	0.0161301
cg08636573	0.713929	0.656929	-0.0570003	hypomethylation	0.0122913	0.0195871
cg08637725	0.899106	0.846964	-0.0521416	hypomethylation	0.00195912	0.00776855
cg08642068	0.618892	0.520767	-0.0981251	hypomethylation	0.0321794	0.0379342
cg08644860	0.601462	0.539844	-0.0616182	hypomethylation	0.00443409	0.0111359
cg08657182	0.524871	0.462819	-0.0620519	hypomethylation	0.00328468	0.00963059
cg08671460	0.233521	0.17556	-0.0579607	hypomethylation	0.000141936	0.00328623
cg08686008	0.64355	0.591232	-0.0523178	hypomethylation	0.0280515	0.0343361
cg08687025	0.483092	0.405997	-0.0770946	hypomethylation	0.004359	0.0110214
cg08690876	0.3089	0.255059	-0.0538408	hypomethylation	0.00136524	0.0068834
cg08699270	0.559236	0.49988	-0.0593566	hypomethylation	8.91668e-05	0.00284303
cg08699441	0.462506	0.40995	-0.052556	hypomethylation	0.0181967	0.0253307
cg08702207	0.907811	0.847868	-0.0599425	hypomethylation	0.00026519	0.00392173
cg08708194	0.434547	0.383667	-0.0508797	hypomethylation	0.00552685	0.0124389
cg08710786	0.603419	0.551541	-0.0518782	hypomethylation	0.000703447	0.00532624
cg08716843	0.325534	0.259516	-0.0660183	hypomethylation	0.00316684	0.00941815
cg08720746	0.318372	0.268001	-0.0503709	hypomethylation	0.00250221	0.0085487
cg08726338	0.350141	0.300086	-0.0500549	hypomethylation	0.0347276	0.0399956
cg08727316	0.856995	0.801052	-0.0559425	hypomethylation	0.00416213	0.0107567
cg08735211	0.230252	0.17182	-0.0584324	hypomethylation	0.000629022	0.00518296
cg08739651	0.193248	0.244317	0.0510687	hypermethylation	0.0293328	0.0354817
cg08742975	0.895858	0.950909	0.0550504	hypermethylation	0.0426934	0.0470703
cg08746828	0.538496	0.487651	-0.0508457	hypomethylation	0.0136149	0.0209056
cg08748820	0.229288	0.177182	-0.0521054	hypomethylation	0.0227412	0.0294747
cg08749656	0.554704	0.493986	-0.0607175	hypomethylation	0.0185689	0.0256639
cg08749689	0.268	0.217887	-0.0501129	hypomethylation	0.00314164	0.00938806
cg08751451	0.689576	0.604559	-0.0850167	hypomethylation	0.0185217	0.0256303
cg08752140	0.233865	0.170489	-0.0633752	hypomethylation	0.000545891	0.00494381
cg08757624	0.887336	0.819295	-0.068041	hypomethylation	0.0174349	0.0246246
cg08760843	0.413573	0.352849	-0.0607239	hypomethylation	0.000394863	0.0044426
cg08762424	0.316194	0.437801	0.121606	hypermethylation	0.0269846	0.033428
cg08763924	0.32629	0.272443	-0.0538465	hypomethylation	0.00730319	0.0142876
cg08766616	0.935774	0.883874	-0.0518997	hypomethylation	0.000537189	0.00491006
cg08770311	0.825072	0.722883	-0.102189	hypomethylation	0.000547378	0.00494671
cg08776296	0.844648	0.744758	-0.09989	hypomethylation	0.0262219	0.032727
cg08777963	0.540365	0.624298	0.0839332	hypermethylation	0.0127709	0.020051
cg08785724	0.452074	0.401963	-0.0501113	hypomethylation	0.0120173	0.0193153
cg08787030	0.863716	0.795022	-0.0686944	hypomethylation	0.00590564	0.0128351
cg08789503	0.323428	0.270893	-0.0525346	hypomethylation	0.00785428	0.0149533
cg08789978	0.409166	0.339006	-0.0701598	hypomethylation	0.00199227	0.00783542
cg08791344	0.35859	0.307896	-0.0506938	hypomethylation	0.00775987	0.0148492
cg08799809	0.678874	0.733254	0.0543803	hypermethylation	0.0300221	0.0361207
cg08809526	0.654027	0.589123	-0.0649047	hypomethylation	0.00102821	0.00612876
cg08810397	0.650416	0.597598	-0.0528174	hypomethylation	0.0402078	0.0448773
cg08813622	0.758151	0.695793	-0.0623583	hypomethylation	0.000781188	0.00549874
cg08817540	0.456353	0.545555	0.0892023	hypermethylation	0.000266136	0.00392173
cg08817797	0.939212	0.885985	-0.0532269	hypomethylation	0.000486276	0.00476473
cg08821521	0.321917	0.264333	-0.0575846	hypomethylation	0.00051472	0.00481757
cg08828287	0.906074	0.84927	-0.0568036	hypomethylation	0.0130532	0.0203441
cg08833992	0.859453	0.807357	-0.0520966	hypomethylation	0.000438309	0.00457327
cg08840765	0.752913	0.679787	-0.0731261	hypomethylation	0.0148115	0.0220702
cg08850243	0.321533	0.269595	-0.0519377	hypomethylation	0.00315093	0.0094009
cg08853920	0.587579	0.523803	-0.0637758	hypomethylation	0.01471	0.0219905
cg08856559	0.83479	0.766409	-0.0683816	hypomethylation	0.000584948	0.00505967
cg08857745	0.751439	0.663279	-0.0881598	hypomethylation	0.00191202	0.00774087
cg08866079	0.3158	0.259634	-0.0561665	hypomethylation	0.00407899	0.0106419
cg08866162	0.868682	0.818375	-0.0503072	hypomethylation	0.00475829	0.0115629
cg08866497	0.641482	0.582438	-0.0590442	hypomethylation	0.00205279	0.00790501
cg08868540	0.582069	0.528586	-0.0534836	hypomethylation	0.00578213	0.0126937
cg08874599	0.812731	0.758082	-0.0546487	hypomethylation	0.000593774	0.00506574
cg08885216	0.891567	0.82766	-0.0639068	hypomethylation	0.00127954	0.00670025
cg08889009	0.309809	0.360667	0.0508589	hypermethylation	0.00203154	0.00788862
cg08897388	0.30661	0.25658	-0.0500292	hypomethylation	0.0012142	0.00653521
cg08902894	0.726917	0.666163	-0.0607532	hypomethylation	0.000968579	0.00598078
cg08902940	0.598377	0.547926	-0.0504506	hypomethylation	0.035391	0.040676
cg08911852	0.303665	0.25281	-0.0508545	hypomethylation	0.00563129	0.0125306
cg08914627	0.788903	0.706314	-0.0825888	hypomethylation	0.000221543	0.0036402
cg08925551	0.905662	0.827335	-0.0783276	hypomethylation	2.03211e-05	0.00172514
cg08933220	0.228468	0.169167	-0.0593008	hypomethylation	0.000107505	0.0030269
cg08933613	0.754667	0.685823	-0.0688437	hypomethylation	4.74551e-06	0.00080573
cg08946103	0.474027	0.415607	-0.0584205	hypomethylation	0.0365389	0.0417238
cg08948128	0.481463	0.427534	-0.0539293	hypomethylation	0.00510853	0.0119612
cg08951855	0.537421	0.480248	-0.0571737	hypomethylation	0.00701057	0.0139391
cg08956208	0.27659	0.225555	-0.0510352	hypomethylation	0.00844034	0.0156335
cg08957127	0.662344	0.604393	-0.057951	hypomethylation	0.0227043	0.0294617
cg08957484	0.377464	0.4284	0.0509359	hypermethylation	0.00180021	0.00757101
cg08959039	0.438169	0.373838	-0.0643311	hypomethylation	0.0315747	0.0374578
cg08962392	0.900514	0.847503	-0.0530109	hypomethylation	0.00556155	0.0124496
cg08967338	0.354292	0.283838	-0.0704545	hypomethylation	0.0320818	0.0378589
cg08977295	0.478453	0.42449	-0.0539625	hypomethylation	0.0106026	0.0179096
cg08984179	0.818043	0.738864	-0.0791783	hypomethylation	3.93878e-05	0.00214262
cg08986245	0.190043	0.139607	-0.0504365	hypomethylation	0.0147029	0.0219857
cg08994455	0.829437	0.757588	-0.0718489	hypomethylation	0.0129055	0.0201874
cg09005171	0.553216	0.503006	-0.0502103	hypomethylation	0.00103666	0.00615951
cg09015232	0.731501	0.668437	-0.0630638	hypomethylation	0.013259	0.0205279
cg09027876	0.621872	0.571581	-0.0502905	hypomethylation	0.0121346	0.0194219
cg09036531	0.582572	0.515756	-0.0668159	hypomethylation	6.44876e-05	0.0027373
cg09044981	0.77054	0.696377	-0.0741623	hypomethylation	0.0352072	0.040498
cg09045363	0.202624	0.151843	-0.0507815	hypomethylation	0.0243623	0.030981
cg09057685	0.485936	0.411294	-0.0746418	hypomethylation	0.00166339	0.00735594
cg09067021	0.862085	0.808068	-0.0540164	hypomethylation	0.0256336	0.0321885
cg09068214	0.222675	0.169695	-0.05298	hypomethylation	0.000418099	0.00452777
cg09085358	0.540886	0.478772	-0.0621142	hypomethylation	0.0100081	0.0173484
cg09085594	0.638321	0.580359	-0.0579619	hypomethylation	0.0175901	0.0247756
cg09098522	0.400566	0.348183	-0.0523827	hypomethylation	0.0037124	0.0101565
cg09101205	0.54271	0.478577	-0.0641326	hypomethylation	0.0150903	0.0223207
cg09103658	0.714083	0.773062	0.0589786	hypermethylation	0.00193736	0.00774087
cg09107055	0.513051	0.44267	-0.070381	hypomethylation	0.00602981	0.0129793
cg09109730	0.558383	0.491096	-0.0672867	hypomethylation	0.0318617	0.037702
cg09119043	0.55259	0.628051	0.0754613	hypermethylation	0.0320436	0.0378458
cg09124484	0.608443	0.554688	-0.0537554	hypomethylation	0.00289934	0.00903505
cg09133462	0.404028	0.348669	-0.0553594	hypomethylation	0.0222097	0.0290197
cg09136950	0.542214	0.472072	-0.0701427	hypomethylation	0.000998192	0.00604635
cg09137597	0.374476	0.324471	-0.0500058	hypomethylation	0.00194722	0.00776418
cg09142135	0.91693	0.840794	-0.0761359	hypomethylation	0.0288187	0.0349959
cg09150734	0.927749	0.87013	-0.0576194	hypomethylation	0.000838402	0.00567829
cg09156426	0.599309	0.549015	-0.0502936	hypomethylation	0.0232194	0.0298733
cg09158588	0.774954	0.713954	-0.061	hypomethylation	0.0231981	0.0298596
cg09162329	0.392402	0.330741	-0.0616602	hypomethylation	0.00664725	0.0135667
cg09164168	0.613484	0.563317	-0.0501664	hypomethylation	0.0133162	0.0205925
cg09164913	0.336803	0.275414	-0.0613884	hypomethylation	0.0270582	0.033497
cg09191490	0.683776	0.630948	-0.0528281	hypomethylation	0.00106881	0.0062446
cg09193022	0.769886	0.716052	-0.0538345	hypomethylation	0.00284033	0.00892562
cg09226904	0.10175	0.169899	0.0681482	hypermethylation	0.00867135	0.0158569
cg09233300	0.943609	0.869521	-0.0740887	hypomethylation	0.000397228	0.00446026
cg09234764	0.633354	0.564357	-0.0689972	hypomethylation	0.0137225	0.0210132
cg09248714	0.29863	0.248039	-0.0505912	hypomethylation	0.0286509	0.0348673
cg09254119	0.320212	0.249458	-0.0707541	hypomethylation	0.0197927	0.0267612
cg09256477	0.722284	0.64659	-0.0756933	hypomethylation	9.85527e-05	0.00288861
cg09259843	0.599664	0.547592	-0.0520719	hypomethylation	0.000275584	0.0039491
cg09268449	0.420703	0.370472	-0.0502316	hypomethylation	0.00152672	0.00714636
cg09277403	0.422995	0.370644	-0.0523507	hypomethylation	0.018408	0.025536
cg09310092	0.332604	0.280918	-0.0516854	hypomethylation	0.00115099	0.00635369
cg09317728	0.435262	0.380812	-0.054451	hypomethylation	0.0293902	0.0355435
cg09319063	0.51479	0.439272	-0.0755181	hypomethylation	0.00134347	0.00685334
cg09320652	0.674326	0.61506	-0.0592659	hypomethylation	0.034911	0.0401821
cg09329137	0.502272	0.441411	-0.0608614	hypomethylation	0.0232177	0.0298733
cg09347959	0.272401	0.209248	-0.0631528	hypomethylation	0.000522133	0.00483915
cg09351848	0.887744	0.825359	-0.062385	hypomethylation	0.000550722	0.00496093
cg09359103	0.648506	0.524787	-0.12372	hypomethylation	0.0183599	0.0254946
cg09362839	0.473061	0.419493	-0.0535683	hypomethylation	0.0154046	0.022652
cg09365147	0.276118	0.224659	-0.0514599	hypomethylation	0.00295642	0.00911155
cg09365792	0.59513	0.527757	-0.0673725	hypomethylation	0.00697219	0.0139349
cg09366265	0.224215	0.158977	-0.0652384	hypomethylation	0.000124499	0.00318127
cg09367467	0.457479	0.406633	-0.0508456	hypomethylation	0.00314789	0.0094009
cg09368486	0.390308	0.337501	-0.0528077	hypomethylation	0.0287101	0.0348943
cg09369939	0.844122	0.894151	0.050029	hypermethylation	0.0203928	0.0273212
cg09373148	0.500733	0.557597	0.056864	hypermethylation	0.0114653	0.0187782
cg09374521	0.952437	0.897743	-0.0546941	hypomethylation	0.00206872	0.00792005
cg09381706	0.885355	0.821494	-0.0638609	hypomethylation	0.00122623	0.00657469
cg09389201	0.702162	0.649255	-0.0529068	hypomethylation	0.0167232	0.0239337
cg09390319	0.528119	0.608506	0.0803876	hypermethylation	0.00158413	0.00723579
cg09396832	0.828365	0.768356	-0.0600095	hypomethylation	0.0144536	0.0217113
cg09396840	0.200736	0.143667	-0.0570683	hypomethylation	0.00176784	0.00750965
cg09402314	0.870031	0.921384	0.0513526	hypermethylation	0.0409979	0.0455776
cg09413976	0.918801	0.865567	-0.0532338	hypomethylation	0.00283633	0.00892306
cg09415825	0.280966	0.22366	-0.0573059	hypomethylation	0.00700508	0.0139391
cg09416608	0.369679	0.298583	-0.0710964	hypomethylation	4.73631e-06	0.00080573
cg09422355	0.767509	0.712827	-0.0546814	hypomethylation	0.00815372	0.0152969
cg09422970	0.770001	0.716539	-0.0534624	hypomethylation	0.0100515	0.017393
cg09436815	0.904773	0.853476	-0.0512966	hypomethylation	0.00114928	0.00635053
cg09437835	0.817091	0.75789	-0.0592011	hypomethylation	0.00106008	0.00622022
cg09456448	0.436777	0.373904	-0.0628731	hypomethylation	0.00198648	0.00782719
cg09461388	0.366083	0.304706	-0.0613769	hypomethylation	0.00506262	0.0118835
cg09463265	0.443613	0.391019	-0.052594	hypomethylation	0.0207881	0.0277094
cg09469610	0.390925	0.327807	-0.063118	hypomethylation	0.00389639	0.0103516
cg09470311	0.562011	0.509895	-0.0521165	hypomethylation	0.0339876	0.0393863
cg09484211	0.468644	0.384908	-0.0837363	hypomethylation	0.00536111	0.0122586
cg09489435	0.633691	0.551756	-0.0819352	hypomethylation	0.00917754	0.0164287
cg09501959	0.749074	0.827652	0.0785781	hypermethylation	6.71802e-05	0.0027408
cg09508668	0.617718	0.561165	-0.0565524	hypomethylation	0.0457538	0.0497204
cg09509462	0.885041	0.824407	-0.0606332	hypomethylation	0.004279	0.0109028
cg09525112	0.339443	0.28094	-0.0585032	hypomethylation	0.00319835	0.00949673
cg09531520	0.221709	0.164351	-0.0573584	hypomethylation	0.000100585	0.00288861
cg09546802	0.390398	0.338404	-0.0519937	hypomethylation	0.0283008	0.0345693
cg09552548	0.417444	0.300983	-0.116461	hypomethylation	0.000333762	0.0041836
cg09557636	0.794456	0.731143	-0.0633124	hypomethylation	0.00970215	0.0169977
cg09561213	0.931033	0.870482	-0.0605511	hypomethylation	0.000165008	0.00350187
cg09584060	0.840271	0.774462	-0.0658092	hypomethylation	0.000367739	0.00435243
cg09584650	0.224395	0.144915	-0.0794792	hypomethylation	0.0316991	0.0375577
cg09586500	0.261221	0.210976	-0.0502451	hypomethylation	0.00410303	0.0106629
cg09590594	0.573911	0.523309	-0.050602	hypomethylation	0.0270398	0.0334815
cg09595843	0.885121	0.818466	-0.066655	hypomethylation	0.00461585	0.0114036
cg09596866	0.339173	0.391293	0.0521194	hypermethylation	0.0224569	0.0292482
cg09597756	0.580622	0.51173	-0.0688924	hypomethylation	0.0268573	0.0333071
cg09605287	0.541214	0.490291	-0.0509234	hypomethylation	0.0044131	0.0110981
cg09610772	0.842479	0.777924	-0.0645551	hypomethylation	0.0243184	0.0309461
cg09613853	0.891696	0.805033	-0.0866634	hypomethylation	0.00176738	0.00750965
cg09618893	0.626937	0.574832	-0.0521047	hypomethylation	0.0440803	0.0482481
cg09624870	0.581137	0.493363	-0.0877742	hypomethylation	2.71672e-05	0.00181211
cg09630983	0.499896	0.409579	-0.0903169	hypomethylation	9.24706e-05	0.00284303
cg09639761	0.808889	0.749598	-0.0592916	hypomethylation	0.000455372	0.00463058
cg09641089	0.560573	0.502921	-0.0576513	hypomethylation	0.00924778	0.0165069
cg09652312	0.523312	0.609494	0.086182	hypermethylation	0.00160501	0.00726072
cg09657260	0.750791	0.688946	-0.0618453	hypomethylation	0.00171834	0.00744615
cg09669354	0.222892	0.156512	-0.0663794	hypomethylation	0.00566557	0.0125613
cg09674580	0.736852	0.657031	-0.0798211	hypomethylation	0.000705106	0.00532708
cg09678707	0.733494	0.682402	-0.0510929	hypomethylation	0.0313633	0.0373097
cg09681244	0.72394	0.673399	-0.050541	hypomethylation	0.00792347	0.0150357
cg09682949	0.698509	0.64393	-0.0545786	hypomethylation	0.00272479	0.00877578
cg09683385	0.307435	0.23857	-0.0688657	hypomethylation	0.00149762	0.00710656
cg09685961	0.707606	0.652535	-0.0550708	hypomethylation	0.0239952	0.0306462
cg09692070	0.879758	0.821005	-0.0587526	hypomethylation	0.0053059	0.0122217
cg09698506	0.297433	0.242853	-0.0545798	hypomethylation	0.0207815	0.0277094
cg09708559	0.311691	0.260783	-0.0509074	hypomethylation	0.00883093	0.0160544
cg09734761	0.48223	0.421571	-0.0606591	hypomethylation	0.00133337	0.00685025
cg09734798	0.69946	0.648508	-0.0509524	hypomethylation	0.010485	0.0177969
cg09735657	0.319421	0.264851	-0.0545692	hypomethylation	0.00146834	0.00707585
cg09737019	0.566169	0.48295	-0.0832191	hypomethylation	0.00196572	0.00778403
cg09739413	0.544082	0.618321	0.0742384	hypermethylation	0.0221797	0.0290019
cg09744766	0.234649	0.292159	0.0575101	hypermethylation	0.0245298	0.0311576
cg09746261	0.46563	0.384748	-0.0808821	hypomethylation	0.000189755	0.00352963
cg09754549	0.823937	0.757819	-0.0661184	hypomethylation	0.0285435	0.0347701
cg09756125	0.735613	0.593881	-0.141732	hypomethylation	0.0362557	0.0414997
cg09762515	0.665919	0.581716	-0.084203	hypomethylation	0.000224279	0.00364242
cg09765747	0.467243	0.392471	-0.0747717	hypomethylation	0.000752167	0.00544803
cg09770131	0.623116	0.696582	0.0734658	hypermethylation	0.0147727	0.0220547
cg09771102	0.286413	0.226586	-0.0598275	hypomethylation	0.00250471	0.00855114
cg09773990	0.902612	0.836892	-0.0657197	hypomethylation	0.0018279	0.00763168
cg09775742	0.258386	0.202716	-0.0556695	hypomethylation	0.000536356	0.00491006
cg09777208	0.293853	0.242957	-0.0508964	hypomethylation	0.00350391	0.00988541
cg09787311	0.40077	0.34134	-0.0594298	hypomethylation	0.00257308	0.00861569
cg09792000	0.479267	0.411917	-0.0673504	hypomethylation	0.00987934	0.0172014
cg09798061	0.551964	0.482413	-0.0695505	hypomethylation	0.000328834	0.00414967
cg09802689	0.939386	0.875022	-0.0643632	hypomethylation	0.00409004	0.0106419
cg09807329	0.752844	0.694426	-0.0584182	hypomethylation	0.00347762	0.00984736
cg09809885	0.926519	0.871665	-0.0548544	hypomethylation	0.0412772	0.0457963
cg09811860	0.548937	0.48229	-0.0666468	hypomethylation	0.00733477	0.0143244
cg09821461	0.243954	0.192709	-0.0512451	hypomethylation	0.000199391	0.00352963
cg09821769	0.362741	0.300983	-0.061758	hypomethylation	0.0311753	0.037165
cg09822192	0.386049	0.3281	-0.0579494	hypomethylation	0.0244986	0.0311331
cg09823288	0.563279	0.480157	-0.0831219	hypomethylation	0.00144129	0.00705527
cg09842602	0.920265	0.866363	-0.0539017	hypomethylation	0.00248616	0.00852891
cg09845941	0.383957	0.300083	-0.0838738	hypomethylation	0.00711414	0.0140601
cg09855037	0.422026	0.371619	-0.0504064	hypomethylation	0.0108548	0.0181823
cg09858862	0.38585	0.334828	-0.0510223	hypomethylation	0.0202348	0.027221
cg09863230	0.426205	0.373509	-0.0526962	hypomethylation	0.014816	0.0220702
cg09864245	0.251349	0.17801	-0.0733392	hypomethylation	0.00038722	0.00441873
cg09872361	0.303482	0.238154	-0.0653281	hypomethylation	0.00763713	0.0147125
cg09880955	0.224361	0.275181	0.0508201	hypermethylation	0.0245741	0.0312007
cg09883968	0.428629	0.377705	-0.0509243	hypomethylation	0.00630111	0.0132177
cg09884290	0.913762	0.859429	-0.0543329	hypomethylation	4.84899e-05	0.00243162
cg09884851	0.501848	0.451685	-0.050163	hypomethylation	0.0170747	0.0243001
cg09889857	0.270655	0.213761	-0.0568942	hypomethylation	0.0367111	0.0418284
cg09908442	0.919048	0.863922	-0.0551257	hypomethylation	0.00400855	0.0105347
cg09916763	0.829022	0.779018	-0.0500041	hypomethylation	0.00890667	0.0161181
cg09922452	0.501073	0.421711	-0.0793618	hypomethylation	0.017439	0.0246246
cg09928736	0.869879	0.800412	-0.0694668	hypomethylation	0.00161353	0.00726072
cg09930282	0.844238	0.784146	-0.0600923	hypomethylation	0.0043213	0.0109657
cg09938582	0.656835	0.600994	-0.0558417	hypomethylation	0.0190217	0.0260583
cg09951759	0.738959	0.677341	-0.0616184	hypomethylation	0.00459566	0.0113885
cg09967308	0.716297	0.645494	-0.0708034	hypomethylation	0.00899246	0.0161957
cg09971646	0.419449	0.366416	-0.0530328	hypomethylation	0.0195984	0.0266038
cg09975738	0.588712	0.533387	-0.0553248	hypomethylation	0.0210414	0.0279125
cg09985739	0.902159	0.834008	-0.0681517	hypomethylation	0.0019069	0.00774087
cg09988528	0.702821	0.638476	-0.0643444	hypomethylation	0.000680099	0.00526831
cg10001715	0.263876	0.212233	-0.0516427	hypomethylation	0.000404948	0.00450184
cg10006535	0.420127	0.363228	-0.0568991	hypomethylation	0.0256255	0.0321885
cg10006811	0.700616	0.645354	-0.0552621	hypomethylation	0.029573	0.0357184
cg10007041	0.618895	0.556392	-0.0625034	hypomethylation	0.010403	0.0177436
cg10008882	0.749485	0.652362	-0.0971234	hypomethylation	0.0189167	0.0259689
cg10008953	0.503771	0.453374	-0.0503965	hypomethylation	0.0372347	0.0422919
cg10009497	0.303878	0.245727	-0.0581506	hypomethylation	0.00167267	0.00737388
cg10009827	0.822192	0.76915	-0.0530425	hypomethylation	8.72219e-05	0.00284303
cg10012448	0.75635	0.682057	-0.0742927	hypomethylation	0.00216762	0.00810218
cg10012825	0.309121	0.257099	-0.0520221	hypomethylation	0.00377938	0.0102596
cg10014274	0.771217	0.824602	0.0533849	hypermethylation	0.00600689	0.0129548
cg10018725	0.401814	0.348687	-0.0531275	hypomethylation	0.00736669	0.0143717
cg10022447	0.446285	0.392069	-0.0542164	hypomethylation	0.0194	0.0264343
cg10023182	0.488153	0.429869	-0.0582834	hypomethylation	0.0210647	0.0279286
cg10025778	0.902898	0.831489	-0.0714099	hypomethylation	2.3617e-05	0.00176435
cg10027732	0.186119	0.132651	-0.0534688	hypomethylation	0.000338688	0.0042104
cg10029307	0.302442	0.244591	-0.0578516	hypomethylation	0.000392144	0.00443454
cg10040506	0.472482	0.417351	-0.0551316	hypomethylation	0.0327179	0.0383765
cg10043073	0.746595	0.822346	0.0757507	hypermethylation	0.00769616	0.0147879
cg10046452	0.659139	0.598089	-0.0610501	hypomethylation	0.00855169	0.015759
cg10047845	0.639015	0.564447	-0.0745678	hypomethylation	0.0225419	0.0293247
cg10062147	0.830867	0.774944	-0.055923	hypomethylation	0.0100902	0.0174423
cg10066043	0.782893	0.727133	-0.0557594	hypomethylation	0.0278769	0.034177
cg10071009	0.441629	0.389969	-0.0516597	hypomethylation	0.00625331	0.013205
cg10072237	0.237507	0.15308	-0.084427	hypomethylation	0.0279412	0.0342242
cg10077360	0.206384	0.156246	-0.050138	hypomethylation	0.00537495	0.0122721
cg10092265	0.458793	0.511256	0.0524629	hypermethylation	0.0207175	0.0276578
cg10095954	0.71223	0.771111	0.0588808	hypermethylation	0.000877564	0.00576417
cg10123347	0.178637	0.0926206	-0.0860165	hypomethylation	3.78739e-08	5.07249e-05
cg10154826	0.292415	0.200248	-0.0921667	hypomethylation	0.026917	0.0333738
cg10155621	0.216585	0.161679	-0.0549059	hypomethylation	0.000296232	0.00410838
cg10162971	0.838916	0.73404	-0.104876	hypomethylation	8.88624e-05	0.00284303
cg10173649	0.776278	0.711352	-0.0649262	hypomethylation	0.0173755	0.0245784
cg10178498	0.475806	0.423221	-0.0525855	hypomethylation	0.0306466	0.0366907
cg10179240	0.696241	0.643161	-0.0530797	hypomethylation	0.00715211	0.0141045
cg10185505	0.756309	0.866115	0.109806	hypermethylation	0.0428893	0.047212
cg10193107	0.441352	0.316904	-0.124447	hypomethylation	0.00884112	0.0160677
cg10196532	0.637978	0.557912	-0.0800663	hypomethylation	0.00565643	0.0125525
[truncated: 3,164 more rows]

## Sheet: Supplementary Table 5
CpG	controls_PL_AVG	cases_PL_BRCA1_mut_AVG	cases_PL_BRCA1_epimut_AVG	deltaBeta_BRCA1_mut	deltaBeta_BRCA1_epimut	DNA_methylation_status_BRCA1_mut	DNA_methylation_status_BRCA1_epimut	P.Value_BRCA1_mut	adj.P.Val_BRCA1_mut	P.Value_BRCA1_epimut	adj.P.Val_BRCA1_epimut
cg00030918	0.857132	0.796269	0.798797	-0.0608632	-0.0583351	hypomethylation	hypomethylation	0.0104093	0.0184064	0.00407273	0.0106385
cg00101154	0.644214	0.553103	0.53569	-0.0911106	-0.108524	hypomethylation	hypomethylation	0.0473715	0.0487035	0.0312004	0.0371869
cg00116583	0.825541	0.765022	0.752176	-0.0605192	-0.0733654	hypomethylation	hypomethylation	0.0265632	0.0318228	0.00481931	0.011609
cg00124920	0.839664	0.775241	0.763135	-0.0644231	-0.0765285	hypomethylation	hypomethylation	0.0187832	0.0257827	0.0067411	0.0136503
cg00126412	0.455726	0.380992	0.387139	-0.0747345	-0.068587	hypomethylation	hypomethylation	0.00175915	0.00909497	0.00698075	0.0139349
cg00139234	0.846703	0.790144	0.789902	-0.0565596	-0.0568008	hypomethylation	hypomethylation	0.018886	0.0258824	0.0141165	0.0214284
cg00177239	0.340718	0.288132	0.290486	-0.0525865	-0.0502322	hypomethylation	hypomethylation	0.00488578	0.0126887	0.00832202	0.0154963
cg00301120	0.400673	0.301928	0.326375	-0.0987455	-0.0742982	hypomethylation	hypomethylation	0.00100862	0.00752456	0.0324816	0.0381908
cg00336022	0.856004	0.799365	0.793083	-0.056638	-0.0629204	hypomethylation	hypomethylation	0.0452552	0.0469872	0.0289139	0.0350811
cg00363750	0.549034	0.485971	0.470206	-0.0630636	-0.0788283	hypomethylation	hypomethylation	0.000939644	0.00749388	0.000406789	0.00451335
cg00375389	0.894591	0.840254	0.831944	-0.0543374	-0.0626472	hypomethylation	hypomethylation	0.00316187	0.010812	0.000169636	0.00350187
cg00413089	0.370432	0.293384	0.242016	-0.0770482	-0.128416	hypomethylation	hypomethylation	0.0376906	0.0409708	0.00156318	0.00723579
cg00413849	0.217569	0.159137	0.148994	-0.0584326	-0.0685752	hypomethylation	hypomethylation	2.35792e-07	0.000187599	6.49141e-09	1.81857e-05
cg00418160	0.873535	0.821693	0.808176	-0.0518423	-0.0653586	hypomethylation	hypomethylation	0.00423724	0.0120039	0.000226772	0.00366169
cg00419321	0.279693	0.206836	0.218341	-0.0728563	-0.0613518	hypomethylation	hypomethylation	0.00306661	0.0107759	0.0331417	0.0387345
cg00457450	0.727482	0.81524	0.806717	0.0877579	0.079235	hypermethylation	hypermethylation	0.00212421	0.00964534	0.00588428	0.0128137
cg00523225	0.246265	0.162727	0.164875	-0.0835378	-0.08139	hypomethylation	hypomethylation	5.82876e-05	0.00318099	0.000949503	0.0059642
cg00615271	0.350028	0.290446	0.292462	-0.0595826	-0.0575656	hypomethylation	hypomethylation	0.00628479	0.0141829	0.0102475	0.0176061
cg00618711	0.607825	0.556278	0.557223	-0.0515478	-0.0506019	hypomethylation	hypomethylation	0.00383201	0.0116064	0.0123461	0.0196576
cg00622128	0.56232	0.49531	0.492147	-0.0670104	-0.0701731	hypomethylation	hypomethylation	0.000855843	0.00717461	0.0029826	0.00915698
cg00642460	0.235172	0.296164	0.312997	0.0609919	0.0778253	hypermethylation	hypermethylation	0.00338678	0.011203	0.00881898	0.0160379
cg00643296	0.370173	0.315602	0.281723	-0.0545719	-0.0884503	hypomethylation	hypomethylation	0.00347742	0.0113825	1.46356e-05	0.00146434
cg00658413	0.347125	0.296159	0.291218	-0.0509654	-0.0559061	hypomethylation	hypomethylation	0.00186368	0.00925601	0.00391242	0.0103794
cg00693915	0.862025	0.79535	0.792702	-0.0666745	-0.0693226	hypomethylation	hypomethylation	0.00251895	0.00995302	0.00564431	0.0125397
cg00698060	0.767049	0.70773	0.700074	-0.0593192	-0.0669752	hypomethylation	hypomethylation	0.00643969	0.0143148	0.00428791	0.0109205
cg00711090	0.280064	0.203764	0.187106	-0.0763004	-0.092958	hypomethylation	hypomethylation	0.000655813	0.00665674	3.73357e-05	0.00213461
cg00767573	0.725647	0.674593	0.663337	-0.0510541	-0.06231	hypomethylation	hypomethylation	0.00916997	0.0173395	0.00126565	0.00666267
cg00793088	0.456812	0.406615	0.397255	-0.050197	-0.0595565	hypomethylation	hypomethylation	0.049008	0.0499989	0.012432	0.0197104
cg00815399	0.353664	0.275176	0.253442	-0.0784882	-0.100222	hypomethylation	hypomethylation	0.0252046	0.0308284	0.0111643	0.0185344
cg00830121	0.914683	0.861545	0.846867	-0.053138	-0.0678168	hypomethylation	hypomethylation	0.00190062	0.00929705	0.000457135	0.00463161
cg00890249	0.848728	0.788359	0.781043	-0.0603686	-0.0676853	hypomethylation	hypomethylation	0.0026082	0.0101083	0.0010602	0.00622022
cg00964035	0.452079	0.376579	0.337286	-0.0754999	-0.114792	hypomethylation	hypomethylation	0.0408778	0.0435167	0.00379863	0.0102768
cg01002284	0.220684	0.16346	0.15256	-0.057224	-0.0681242	hypomethylation	hypomethylation	0.00412047	0.0118811	0.00249732	0.00854258
cg01050736	0.800963	0.748421	0.728569	-0.0525422	-0.0723946	hypomethylation	hypomethylation	0.009213	0.0173855	0.00276648	0.00881147
cg01071808	0.621337	0.554824	0.560632	-0.0665128	-0.060705	hypomethylation	hypomethylation	0.00626835	0.0141826	0.00504592	0.0118678
cg01119903	0.405944	0.342071	0.35303	-0.0638735	-0.0529143	hypomethylation	hypomethylation	0.00452141	0.0123195	0.00715154	0.0141045
cg01131999	0.865858	0.784067	0.803481	-0.0817913	-0.0623774	hypomethylation	hypomethylation	7.12558e-05	0.0032687	0.00335744	0.00973715
cg01152927	0.778785	0.724575	0.716257	-0.0542107	-0.062528	hypomethylation	hypomethylation	0.0169886	0.0242128	0.00476096	0.0115629
cg01156070	0.299723	0.246064	0.236696	-0.0536586	-0.0630264	hypomethylation	hypomethylation	0.0111791	0.0190444	0.00632126	0.0132354
cg01157950	0.91558	0.850314	0.834304	-0.0652665	-0.0812761	hypomethylation	hypomethylation	0.00114989	0.00783153	0.000272753	0.00394651
cg01202519	0.408554	0.464238	0.48275	0.0556832	0.074196	hypermethylation	hypermethylation	0.0171751	0.0243781	0.0330084	0.0386189
cg01202976	0.883201	0.942847	0.944875	0.0596465	0.0616748	hypermethylation	hypermethylation	0.00882404	0.0169947	0.022656	0.0294255
cg01216388	0.71844	0.66087	0.662329	-0.0575698	-0.056111	hypomethylation	hypomethylation	0.00473472	0.0124671	0.011554	0.0188573
cg01217923	0.731188	0.666658	0.667372	-0.0645299	-0.0638158	hypomethylation	hypomethylation	0.0106452	0.0185355	0.0141456	0.0214284
cg01231800	0.803816	0.751758	0.753655	-0.0520581	-0.0501609	hypomethylation	hypomethylation	0.00457936	0.0123427	0.0192776	0.0263292
cg01271129	0.526255	0.457239	0.455809	-0.0690157	-0.0704459	hypomethylation	hypomethylation	0.000830739	0.00708093	0.00111153	0.00629081
cg01275656	0.380453	0.320145	0.319202	-0.060308	-0.0612514	hypomethylation	hypomethylation	0.0171157	0.0243284	0.0149815	0.0222248
cg01335710	0.940872	0.889702	0.887376	-0.0511693	-0.053496	hypomethylation	hypomethylation	0.00772213	0.0157693	0.000996363	0.00604635
cg01367324	0.38057	0.314917	0.321431	-0.0656527	-0.0591389	hypomethylation	hypomethylation	0.00370082	0.0114567	0.00943835	0.0167246
cg01412970	0.356896	0.444634	0.435018	0.0877381	0.0781217	hypermethylation	hypermethylation	0.00889873	0.0170475	0.0256963	0.0322394
cg01427108	0.782391	0.58395	0.588493	-0.198441	-0.193898	hypomethylation	hypomethylation	0.00183076	0.00915462	0.00262281	0.00866486
cg01508988	0.359908	0.295561	0.287144	-0.0643469	-0.0727639	hypomethylation	hypomethylation	0.000128621	0.00382281	2.34446e-05	0.00176435
cg01511514	0.884464	0.809412	0.805418	-0.0750522	-0.0790457	hypomethylation	hypomethylation	1.22481e-05	0.00242755	3.73738e-06	0.000747876
cg01533966	0.63107	0.562269	0.53993	-0.0688013	-0.0911397	hypomethylation	hypomethylation	0.000808968	0.00705896	0.000170101	0.00350187
cg01538257	0.744675	0.669867	0.654362	-0.0748078	-0.0903124	hypomethylation	hypomethylation	0.000597451	0.00664039	5.92607e-05	0.00269949
cg01548680	0.30603	0.253305	0.253258	-0.0527241	-0.0527713	hypomethylation	hypomethylation	0.00062837	0.00665674	0.00201638	0.00788862
cg01612133	0.796087	0.745071	0.739395	-0.051016	-0.0566919	hypomethylation	hypomethylation	0.0152384	0.022589	0.00983272	0.0171467
cg01680988	0.907589	0.82435	0.829129	-0.0832397	-0.0784602	hypomethylation	hypomethylation	0.000101324	0.00347289	0.00036348	0.00434239
cg01696605	0.790752	0.730386	0.711264	-0.0603661	-0.0794885	hypomethylation	hypomethylation	0.0134862	0.0209032	0.00692911	0.0138656
cg01713095	0.870115	0.813845	0.795615	-0.05627	-0.0744998	hypomethylation	hypomethylation	0.0176156	0.0247078	0.005622	0.0125249
cg01722829	0.499344	0.446336	0.440429	-0.0530087	-0.0589154	hypomethylation	hypomethylation	0.00994563	0.017861	0.020296	0.0272707
cg01730785	0.9311	0.878099	0.878733	-0.0530013	-0.0523676	hypomethylation	hypomethylation	0.00202814	0.00945841	0.000933602	0.00594212
cg01739960	0.675797	0.620273	0.608763	-0.0555247	-0.0670339	hypomethylation	hypomethylation	0.0365633	0.0400561	0.0428485	0.0472041
cg01741606	0.595485	0.54139	0.528703	-0.0540952	-0.0667822	hypomethylation	hypomethylation	0.000979989	0.00752456	0.00013839	0.00328623
cg01743873	0.446787	0.395278	0.388706	-0.0515085	-0.0580808	hypomethylation	hypomethylation	0.0105298	0.0184552	0.00112273	0.00631594
cg01747862	0.402478	0.322994	0.343865	-0.0794836	-0.0586123	hypomethylation	hypomethylation	0.00439391	0.0121555	0.0338204	0.0392329
cg01760756	0.209102	0.14561	0.120345	-0.0634917	-0.0887561	hypomethylation	hypomethylation	0.00251788	0.00995302	0.000264907	0.00392173
cg01797371	0.189726	0.131045	0.120917	-0.0586804	-0.0688086	hypomethylation	hypomethylation	0.00633577	0.014209	0.00641276	0.0133146
cg01817364	0.796355	0.855006	0.86041	0.0586509	0.0640546	hypermethylation	hypermethylation	0.00057162	0.00649513	0.00188216	0.00768799
cg01850179	0.333637	0.255576	0.240991	-0.0780613	-0.0926467	hypomethylation	hypomethylation	0.0027319	0.0104042	0.000643686	0.0051916
cg01860545	0.821888	0.771204	0.758634	-0.050684	-0.0632541	hypomethylation	hypomethylation	0.0163968	0.0236407	0.00267024	0.008713
cg01904886	0.518272	0.4251	0.40476	-0.0931726	-0.113513	hypomethylation	hypomethylation	0.000703017	0.00676989	6.88831e-05	0.0027408
cg01910804	0.576907	0.498918	0.488571	-0.0779895	-0.0883362	hypomethylation	hypomethylation	0.000212994	0.00471042	0.000276438	0.00395123
cg01925738	0.573318	0.634182	0.628647	0.0608639	0.0553283	hypermethylation	hypermethylation	0.0129195	0.0204748	0.0348866	0.0401622
cg01930518	0.206572	0.156087	0.149625	-0.0504847	-0.0569468	hypomethylation	hypomethylation	0.00317322	0.010812	0.00147662	0.00707743
cg01971034	0.832368	0.763101	0.781344	-0.0692668	-0.0510237	hypomethylation	hypomethylation	0.00132922	0.00820079	0.0179034	0.025068
cg01988523	0.874685	0.947266	0.96377	0.0725814	0.0890851	hypermethylation	hypermethylation	0.0458026	0.0474969	0.0115738	0.0188787
cg02004203	0.916773	0.854198	0.840586	-0.0625745	-0.0761871	hypomethylation	hypomethylation	0.00291816	0.0105991	0.000126263	0.00318672
cg02054572	0.856251	0.737303	0.715022	-0.118948	-0.141229	hypomethylation	hypomethylation	2.97422e-07	0.000187599	1.39069e-09	7.79204e-06
cg02070549	0.303819	0.250559	0.239352	-0.05326	-0.0644669	hypomethylation	hypomethylation	0.0081271	0.0162735	0.00570955	0.0126088
cg02076818	0.865993	0.812281	0.804	-0.0537117	-0.0619931	hypomethylation	hypomethylation	0.00894878	0.0171044	0.000983412	0.00601534
cg02095324	0.883402	0.812502	0.802785	-0.0709002	-0.0806168	hypomethylation	hypomethylation	0.012305	0.0198627	0.0155046	0.0227296
cg02107357	0.669513	0.587231	0.588794	-0.0822817	-0.0807187	hypomethylation	hypomethylation	0.00637067	0.0142493	0.0108819	0.0182113
cg02111951	0.334357	0.395081	0.400815	0.0607234	0.0664577	hypermethylation	hypermethylation	0.0230495	0.0292843	0.0341629	0.0395158
cg02122540	0.798418	0.743545	0.737111	-0.0548735	-0.0613067	hypomethylation	hypomethylation	0.00310805	0.010812	0.00335696	0.00973715
cg02143656	0.753833	0.69337	0.691633	-0.0604632	-0.0622005	hypomethylation	hypomethylation	0.00483271	0.012596	0.000518202	0.00483076
cg02179936	0.536043	0.466761	0.467055	-0.0692821	-0.0689888	hypomethylation	hypomethylation	0.019143	0.0260788	0.0180474	0.0251917
cg02285852	0.769239	0.70928	0.713133	-0.0599589	-0.0561055	hypomethylation	hypomethylation	0.0321283	0.036415	0.0401569	0.0448384
cg02286533	0.6172	0.668306	0.713799	0.0511054	0.0965987	hypermethylation	hypermethylation	0.0359339	0.0394866	0.000867955	0.00574162
cg02290262	0.395034	0.335498	0.321524	-0.0595355	-0.0735095	hypomethylation	hypomethylation	0.0151231	0.0224974	0.00572978	0.0126294
cg02291908	0.910821	0.854762	0.86046	-0.0560589	-0.0503605	hypomethylation	hypomethylation	0.000528311	0.00638695	0.00306292	0.00926889
cg02306639	0.466024	0.404841	0.395013	-0.0611822	-0.0710103	hypomethylation	hypomethylation	0.00696485	0.0149529	0.00610754	0.0130513
cg02343008	0.349088	0.298428	0.286429	-0.0506599	-0.0626587	hypomethylation	hypomethylation	0.00457195	0.0123427	0.0020181	0.00788862
cg02349146	0.513768	0.462719	0.451421	-0.0510491	-0.0623471	hypomethylation	hypomethylation	0.0206955	0.0272959	0.0124888	0.0197613
cg02364831	0.333704	0.279559	0.264343	-0.0541449	-0.0693612	hypomethylation	hypomethylation	0.00488838	0.0126887	0.00120966	0.00652329
cg02380135	0.36412	0.307961	0.307185	-0.0561593	-0.0569356	hypomethylation	hypomethylation	0.000543035	0.00638695	0.000345528	0.00422707
cg02392555	0.393542	0.34227	0.338667	-0.0512727	-0.0548752	hypomethylation	hypomethylation	0.0122045	0.0197936	0.0111173	0.0184837
cg02492567	0.828523	0.751401	0.724935	-0.0771219	-0.103588	hypomethylation	hypomethylation	0.00359469	0.0114567	0.000322447	0.00414967
cg02551604	0.249539	0.196431	0.191791	-0.0531078	-0.0577476	hypomethylation	hypomethylation	0.000223213	0.0047325	0.00017864	0.00351
cg02605776	0.409705	0.354469	0.348306	-0.0552367	-0.0613992	hypomethylation	hypomethylation	0.00246922	0.00995302	0.00146212	0.00707585
cg02655549	0.531351	0.466981	0.456579	-0.0643701	-0.0747722	hypomethylation	hypomethylation	0.00127013	0.0081268	0.000386193	0.00441873
cg02688549	0.581656	0.516462	0.515294	-0.0651945	-0.0663618	hypomethylation	hypomethylation	0.00309387	0.010812	0.00299281	0.00916276
cg02706365	0.339727	0.266012	0.271032	-0.0737148	-0.0686947	hypomethylation	hypomethylation	0.00150591	0.00860816	0.015414	0.022652
cg02713706	0.668601	0.719902	0.726556	0.051301	0.057955	hypermethylation	hypermethylation	0.0330759	0.0371387	0.0320734	0.0378578
cg02719489	0.90458	0.842538	0.825133	-0.0620412	-0.0794466	hypomethylation	hypomethylation	0.0043231	0.0120521	0.000509502	0.00481305
cg02766704	0.788653	0.736311	0.711579	-0.0523419	-0.077074	hypomethylation	hypomethylation	0.00208672	0.00952316	0.000193731	0.00352963
cg02793280	0.820826	0.765689	0.717599	-0.0551365	-0.103226	hypomethylation	hypomethylation	0.0145983	0.0219105	8.27188e-05	0.00284303
cg02832476	0.614582	0.54786	0.554468	-0.0667219	-0.060114	hypomethylation	hypomethylation	0.00240613	0.00995302	0.00952612	0.0168216
cg02833950	0.756234	0.701952	0.698604	-0.0542818	-0.05763	hypomethylation	hypomethylation	0.0296361	0.034413	0.0436372	0.0479035
cg02848875	0.556201	0.647102	0.634712	0.0909008	0.0785111	hypermethylation	hypermethylation	0.00206394	0.00951979	0.032101	0.0378737
cg02865165	0.381162	0.322552	0.32152	-0.0586105	-0.0596423	hypomethylation	hypomethylation	0.0291238	0.0339711	0.0422093	0.0466334
cg02867811	0.928226	0.868679	0.850355	-0.0595474	-0.0778711	hypomethylation	hypomethylation	0.00145826	0.00849176	0.000117072	0.00310756
cg02913402	0.697441	0.633708	0.608851	-0.0637326	-0.0885899	hypomethylation	hypomethylation	0.000564312	0.00649513	2.87286e-05	0.00185806
cg02921624	0.329292	0.269196	0.256742	-0.0600966	-0.0725509	hypomethylation	hypomethylation	4.31746e-05	0.00296349	2.2181e-06	0.00057795
cg02928184	0.609616	0.557273	0.557767	-0.0523435	-0.0518492	hypomethylation	hypomethylation	0.0302194	0.0349101	0.0441343	0.0482883
cg02956042	0.844757	0.774782	0.767506	-0.0699746	-0.077251	hypomethylation	hypomethylation	0.00167418	0.00893343	0.000290241	0.00406045
cg02974204	0.620743	0.569256	0.56443	-0.0514871	-0.0563129	hypomethylation	hypomethylation	0.00723615	0.0152165	0.0176629	0.0248344
cg03043822	0.667908	0.723081	0.731258	0.0551722	0.0633491	hypermethylation	hypermethylation	0.0386312	0.0417773	0.0237145	0.030357
cg03064754	0.936256	0.886047	0.885935	-0.0502094	-0.0503207	hypomethylation	hypomethylation	0.0227324	0.0290252	0.0154763	0.0227037
cg03087600	0.843431	0.778479	0.772649	-0.0649519	-0.0707811	hypomethylation	hypomethylation	0.00022924	0.00474075	0.000161232	0.0034541
cg03111858	0.864002	0.805022	0.803808	-0.0589795	-0.0601938	hypomethylation	hypomethylation	0.00611348	0.0140408	0.0025533	0.00861569
cg03133378	0.70913	0.777408	0.786104	0.0682773	0.0769739	hypermethylation	hypermethylation	0.0233847	0.0294555	0.0359556	0.0412151
cg03141074	0.819315	0.76857	0.763859	-0.0507452	-0.055456	hypomethylation	hypomethylation	0.00779738	0.0158524	0.0104503	0.0177791
cg03147592	0.601909	0.683926	0.691139	0.0820171	0.0892291	hypermethylation	hypermethylation	0.00250445	0.00995302	0.0128702	0.0201542
cg03163337	0.934678	0.872358	0.876839	-0.06232	-0.0578387	hypomethylation	hypomethylation	0.000655312	0.00665674	0.000713429	0.00533002
cg03176520	0.486828	0.430132	0.431959	-0.0566959	-0.0548683	hypomethylation	hypomethylation	0.00377068	0.0115314	0.0206391	0.0275729
cg03207151	0.463352	0.403182	0.388972	-0.0601692	-0.0743796	hypomethylation	hypomethylation	0.0072897	0.0152793	0.00437895	0.01105
cg03221652	0.393764	0.33111	0.339435	-0.0626538	-0.054329	hypomethylation	hypomethylation	0.00400442	0.0116665	0.0416937	0.0461314
cg03303774	0.374802	0.297212	0.297666	-0.0775902	-0.077136	hypomethylation	hypomethylation	0.000427504	0.00613812	0.0014657	0.00707585
cg03310027	0.795467	0.85503	0.854618	0.059563	0.0591502	hypermethylation	hypermethylation	1.34744e-05	0.00242755	3.3344e-05	0.00203072
cg03319082	0.566376	0.504898	0.466384	-0.0614775	-0.0999914	hypomethylation	hypomethylation	0.0288433	0.033785	0.00169015	0.0073926
cg03328727	0.322299	0.254196	0.233521	-0.0681021	-0.088778	hypomethylation	hypomethylation	0.0195298	0.0264061	0.00792441	0.0150357
cg03334052	0.733934	0.65127	0.659854	-0.0826637	-0.0740804	hypomethylation	hypomethylation	2.8137e-05	0.00252693	0.000295588	0.00410838
cg03338950	0.266716	0.198778	0.18079	-0.0679375	-0.0859252	hypomethylation	hypomethylation	0.0104452	0.0184073	0.00548146	0.0124041
cg03350138	0.450068	0.381374	0.374227	-0.068694	-0.0758412	hypomethylation	hypomethylation	0.0106737	0.0185703	0.0136824	0.0209691
cg03353394	0.525705	0.468958	0.451065	-0.0567469	-0.0746401	hypomethylation	hypomethylation	0.00274592	0.0104042	0.000621718	0.00518296
cg03369084	0.327009	0.267118	0.264621	-0.0598903	-0.0623881	hypomethylation	hypomethylation	0.0270612	0.0321506	0.0360793	0.041323
cg03369398	0.675758	0.62498	0.607651	-0.0507772	-0.068106	hypomethylation	hypomethylation	0.0125233	0.0201122	0.000863162	0.00573359
cg03392386	0.723449	0.805091	0.790286	0.0816416	0.0668372	hypermethylation	hypermethylation	6.30399e-05	0.00318099	0.0135888	0.0208769
cg03395546	0.390743	0.33092	0.330584	-0.0598226	-0.0601588	hypomethylation	hypomethylation	9.01574e-05	0.00334566	9.99016e-05	0.00288861
cg03409548	0.640344	0.579222	0.554833	-0.0611222	-0.0855109	hypomethylation	hypomethylation	0.00224382	0.00977469	0.000196401	0.00352963
cg03463411	0.426771	0.365438	0.367347	-0.0613329	-0.0594241	hypomethylation	hypomethylation	0.0146881	0.021993	0.0397807	0.0445243
cg03464017	0.800904	0.721623	0.692638	-0.0792812	-0.108266	hypomethylation	hypomethylation	0.00606177	0.0139711	0.000304524	0.0041428
cg03470837	0.592107	0.53022	0.531984	-0.0618874	-0.060123	hypomethylation	hypomethylation	0.00312916	0.010812	0.00888181	0.0161028
cg03478379	0.615823	0.556	0.541883	-0.0598233	-0.0739401	hypomethylation	hypomethylation	0.00181939	0.00915462	0.000368164	0.00435243
cg03483707	0.202023	0.148691	0.144937	-0.0533322	-0.0570857	hypomethylation	hypomethylation	0.00845789	0.0166064	0.0115719	0.0188787
cg03483727	0.543583	0.466152	0.476475	-0.0774311	-0.0671084	hypomethylation	hypomethylation	0.00842708	0.0165717	0.0308951	0.0369725
cg03495944	0.80672	0.858388	0.864152	0.0516678	0.0574323	hypermethylation	hypermethylation	0.00219325	0.00975424	0.00857794	0.0157634
cg03521982	0.767313	0.705089	0.683068	-0.0622241	-0.0842449	hypomethylation	hypomethylation	0.000735418	0.0069089	0.00239435	0.00841218
cg03550951	0.582477	0.52796	0.496702	-0.0545167	-0.0857752	hypomethylation	hypomethylation	0.0218664	0.0282773	0.00445978	0.0111854
cg03581189	0.90243	0.843289	0.841295	-0.0591414	-0.0611355	hypomethylation	hypomethylation	0.0417715	0.044207	0.0397882	0.0445243
cg03635702	0.41744	0.331006	0.290829	-0.0864336	-0.126611	hypomethylation	hypomethylation	0.0480786	0.04933	0.00614763	0.0130921
cg03644971	0.896625	0.84238	0.83698	-0.0542453	-0.0596449	hypomethylation	hypomethylation	0.00177854	0.00911249	0.00183963	0.00765216
cg03665818	0.832007	0.760952	0.751111	-0.0710549	-0.0808955	hypomethylation	hypomethylation	0.00421573	0.0120039	0.00271865	0.00877578
cg03676918	0.837802	0.777694	0.77743	-0.0601081	-0.0603723	hypomethylation	hypomethylation	0.00157213	0.00873074	0.00399123	0.0105089
cg03705621	0.48659	0.429194	0.407623	-0.0573958	-0.078967	hypomethylation	hypomethylation	0.0104669	0.0184285	0.00611806	0.0130638
cg03706977	0.844292	0.781653	0.789054	-0.0626396	-0.0552383	hypomethylation	hypomethylation	2.87588e-05	0.00252693	0.000315282	0.00414967
cg03736781	0.422471	0.370121	0.367732	-0.0523498	-0.0547387	hypomethylation	hypomethylation	0.0302881	0.0349521	0.0310693	0.0370938
cg03740217	0.73812	0.684889	0.683991	-0.053231	-0.0541288	hypomethylation	hypomethylation	0.00543423	0.01336	0.00158166	0.00723579
cg03754708	0.735273	0.666119	0.650283	-0.0691541	-0.0849908	hypomethylation	hypomethylation	0.000168944	0.00425123	6.6507e-06	0.00097903
cg03798743	0.210273	0.151868	0.147191	-0.0584044	-0.0630812	hypomethylation	hypomethylation	0.000630687	0.00665674	0.00276502	0.00881147
cg03838769	0.784583	0.729628	0.715827	-0.0549542	-0.0687552	hypomethylation	hypomethylation	0.0118941	0.0195243	0.0084377	0.0156335
cg03870816	0.823408	0.773398	0.758036	-0.0500099	-0.065372	hypomethylation	hypomethylation	0.00798984	0.0160497	0.000975554	0.00599345
cg03871489	0.759497	0.685024	0.699905	-0.0744729	-0.0595916	hypomethylation	hypomethylation	0.000858446	0.00717461	0.00969377	0.0169977
cg03887787	0.304363	0.23655	0.229008	-0.0678127	-0.0753553	hypomethylation	hypomethylation	0.00543988	0.01336	0.00256947	0.00861569
cg03890691	0.365148	0.422741	0.435401	0.0575931	0.0702537	hypermethylation	hypermethylation	0.00875436	0.0169251	0.0119337	0.019236
cg03938978	0.460629	0.357114	0.352837	-0.103515	-0.107792	hypomethylation	hypomethylation	0.0260106	0.0314145	0.0246964	0.0313276
cg03980231	0.579559	0.521803	0.515636	-0.0577564	-0.0639235	hypomethylation	hypomethylation	0.00152401	0.00864063	0.00658151	0.013488
cg04017413	0.390997	0.309724	0.29335	-0.0812731	-0.0976475	hypomethylation	hypomethylation	2.62364e-05	0.00252693	6.4954e-07	0.000259955
cg04038455	0.753821	0.806066	0.825754	0.0522447	0.0719328	hypermethylation	hypermethylation	0.00701836	0.0150317	0.00342338	0.00979335
cg04038932	0.328522	0.254943	0.244009	-0.0735781	-0.084513	hypomethylation	hypomethylation	0.000162217	0.00417627	0.000144911	0.0033276
cg04075781	0.316747	0.263029	0.237302	-0.0537178	-0.0794454	hypomethylation	hypomethylation	0.0116345	0.0193499	0.00135666	0.00685427
cg04075986	0.261558	0.194479	0.202936	-0.0670795	-0.0586217	hypomethylation	hypomethylation	0.00447342	0.0122759	0.0384199	0.0433394
cg04076766	0.202305	0.2673	0.266329	0.0649949	0.0640247	hypermethylation	hypermethylation	0.0122759	0.0198411	0.0184609	0.0255778
cg04105270	0.436276	0.381379	0.378189	-0.0548967	-0.0580861	hypomethylation	hypomethylation	0.00709505	0.0150807	0.0109899	0.0183426
cg04135377	0.5068	0.449713	0.42264	-0.0570868	-0.0841597	hypomethylation	hypomethylation	0.0146819	0.021993	0.00259473	0.00863915
cg04146883	0.875502	0.819779	0.799768	-0.055723	-0.0757342	hypomethylation	hypomethylation	0.00468545	0.0124671	0.0016887	0.00739201
cg04165656	0.372804	0.318185	0.289221	-0.0546196	-0.083583	hypomethylation	hypomethylation	0.0385612	0.0417374	0.00445067	0.0111675
cg04204897	0.8384	0.774687	0.780326	-0.0637126	-0.0580739	hypomethylation	hypomethylation	0.00168882	0.00895145	0.000807239	0.00557701
cg04258514	0.641886	0.589695	0.556354	-0.0521909	-0.0855325	hypomethylation	hypomethylation	0.0189389	0.025925	0.00288244	0.00900239
cg04264726	0.301492	0.242928	0.218449	-0.0585638	-0.0830427	hypomethylation	hypomethylation	0.0290407	0.0339211	0.00327825	0.00963059
cg04292104	0.530298	0.464079	0.468328	-0.066219	-0.0619701	hypomethylation	hypomethylation	0.000145713	0.0040043	0.00762056	0.0147032
cg04300553	0.805337	0.72106	0.669354	-0.0842771	-0.135983	hypomethylation	hypomethylation	0.00655007	0.0144537	2.28896e-06	0.00057795
cg04308838	0.735529	0.676483	0.66854	-0.0590458	-0.0669893	hypomethylation	hypomethylation	0.0015857	0.00873074	0.0010932	0.0062834
cg04316909	0.257611	0.186162	0.198182	-0.0714493	-0.0594289	hypomethylation	hypomethylation	0.00309249	0.010812	0.0231094	0.029814
cg04348643	0.69489	0.632842	0.608259	-0.0620475	-0.0866312	hypomethylation	hypomethylation	0.000121444	0.00373663	1.36464e-05	0.00139956
cg04364764	0.780373	0.717625	0.707814	-0.062748	-0.0725587	hypomethylation	hypomethylation	0.0110658	0.0189668	0.0019698	0.00778549
cg04385438	0.3857	0.328783	0.332697	-0.0569169	-0.0530032	hypomethylation	hypomethylation	0.000297112	0.00523647	0.00158701	0.00723579
cg04436207	0.247025	0.180888	0.185823	-0.0661363	-0.0612019	hypomethylation	hypomethylation	0.00596755	0.0138766	0.0322105	0.0379548
cg04440119	0.89885	0.847278	0.827146	-0.0515715	-0.0717035	hypomethylation	hypomethylation	0.0242771	0.0301284	0.00497006	0.0117721
cg04461867	0.709471	0.653656	0.651668	-0.0558151	-0.0578033	hypomethylation	hypomethylation	0.0109078	0.0188239	0.0275136	0.0338587
cg04486436	0.8666	0.808351	0.810452	-0.0582491	-0.056148	hypomethylation	hypomethylation	0.00392201	0.0116665	0.00679864	0.0137074
cg04511182	0.609824	0.553504	0.540531	-0.0563201	-0.0692934	hypomethylation	hypomethylation	0.0312422	0.0356187	0.0150643	0.0222999
cg04517524	0.508068	0.558161	0.575006	0.0500933	0.066938	hypermethylation	hypermethylation	0.034771	0.0386152	0.0143193	0.0215911
cg04522024	0.868402	0.813097	0.8004	-0.0553046	-0.0680014	hypomethylation	hypomethylation	0.00242704	0.00995302	0.000240871	0.00375933
cg04524478	0.268935	0.210862	0.185823	-0.0580733	-0.083112	hypomethylation	hypomethylation	0.00105245	0.00755489	1.91604e-05	0.00166285
cg04585475	0.774887	0.710627	0.702252	-0.06426	-0.0726347	hypomethylation	hypomethylation	0.00157809	0.00873074	0.000470914	0.00470326
cg04612608	0.578842	0.661715	0.657675	0.0828733	0.0788327	hypermethylation	hypermethylation	8.87939e-05	0.00334566	0.000745977	0.00544803
cg04682830	0.834693	0.784482	0.773662	-0.0502116	-0.0610317	hypomethylation	hypomethylation	0.00387351	0.0116482	0.000589998	0.00505967
cg04705669	0.521429	0.433267	0.430757	-0.0881623	-0.0906721	hypomethylation	hypomethylation	0.0178055	0.0248196	0.0184866	0.0255943
cg04714058	0.811993	0.748719	0.745476	-0.0632738	-0.0665169	hypomethylation	hypomethylation	0.000954691	0.00751735	0.00140562	0.00696347
cg04721103	0.918681	0.867655	0.864182	-0.0510267	-0.0544991	hypomethylation	hypomethylation	0.000494794	0.00627463	0.00108112	0.00627074
cg04779233	0.784609	0.733934	0.731056	-0.0506747	-0.0535532	hypomethylation	hypomethylation	0.0156861	0.0229334	0.00982973	0.0171467
cg04783624	0.8088	0.733012	0.723792	-0.0757878	-0.0850075	hypomethylation	hypomethylation	0.00155919	0.00873074	0.00312946	0.00937667
cg04807561	0.776001	0.719645	0.707766	-0.0563556	-0.0682347	hypomethylation	hypomethylation	0.00278661	0.0104622	0.00995181	0.0172899
cg04821248	0.691837	0.751263	0.769734	0.059426	0.0778972	hypermethylation	hypermethylation	0.0103116	0.0182826	0.0027358	0.00877578
cg04850382	0.599556	0.536115	0.530248	-0.063441	-0.0693077	hypomethylation	hypomethylation	0.00334528	0.0111305	0.00423497	0.0108628
cg04875128	0.207733	0.261367	0.258476	0.053634	0.0507437	hypermethylation	hypermethylation	0.0056179	0.0135356	0.0197707	0.0267508
cg04875591	0.728153	0.664227	0.668368	-0.0639253	-0.0597851	hypomethylation	hypomethylation	0.00304644	0.0107499	0.0135222	0.0208088
cg04883648	0.927867	0.866772	0.873982	-0.0610948	-0.0538855	hypomethylation	hypomethylation	0.000218123	0.00471042	0.00175667	0.0074886
cg04894169	0.67724	0.745266	0.738466	0.0680268	0.0612268	hypermethylation	hypermethylation	0.00291049	0.0105962	0.0166969	0.0239144
cg04928457	0.832174	0.777725	0.777759	-0.0544486	-0.0544145	hypomethylation	hypomethylation	0.0023416	0.00995302	0.0113521	0.0186796
cg04944853	0.935633	0.8828	0.859222	-0.0528329	-0.0764111	hypomethylation	hypomethylation	0.014867	0.0222343	0.00173822	0.00747946
cg04945518	0.870821	0.811178	0.817008	-0.0596422	-0.0538122	hypomethylation	hypomethylation	0.00284663	0.0105463	0.014281	0.0215591
cg05002041	0.226365	0.156753	0.141469	-0.069612	-0.0848959	hypomethylation	hypomethylation	5.02897e-07	0.000253762	4.52658e-08	5.07249e-05
cg05009104	0.80841	0.756224	0.753129	-0.0521863	-0.0552809	hypomethylation	hypomethylation	0.0074389	0.0154472	0.0201096	0.0270981
cg05014721	0.616528	0.683492	0.686108	0.0669641	0.0695805	hypermethylation	hypermethylation	0.00786649	0.0158944	0.00955461	0.0168523
cg05021355	0.474293	0.419338	0.407348	-0.0549547	-0.0669451	hypomethylation	hypomethylation	0.0335906	0.0375661	0.0143107	0.0215893
cg05031539	0.877858	0.818772	0.802573	-0.0590866	-0.0752849	hypomethylation	hypomethylation	0.00187865	0.00929705	0.000232434	0.00369979
cg05041596	0.355328	0.304323	0.303708	-0.0510045	-0.0516196	hypomethylation	hypomethylation	0.025634	0.0311912	0.0450722	0.0491447
cg05044291	0.343993	0.262352	0.271513	-0.0816413	-0.07248	hypomethylation	hypomethylation	0.00998462	0.0179111	0.0389925	0.0438265
cg05062489	0.651832	0.592739	0.581101	-0.0590922	-0.0707302	hypomethylation	hypomethylation	0.00219989	0.00975452	0.00110717	0.0062834
cg05140286	0.827295	0.773075	0.767248	-0.0542205	-0.0600478	hypomethylation	hypomethylation	0.00923592	0.0173994	0.014615	0.0218835
cg05158606	0.455755	0.395019	0.381231	-0.0607356	-0.0745236	hypomethylation	hypomethylation	0.0112242	0.0190826	0.0035142	0.00990447
cg05167694	0.65185	0.596518	0.591421	-0.0553315	-0.0604284	hypomethylation	hypomethylation	0.00185757	0.00924387	0.00371069	0.0101565
cg05194412	0.463623	0.411397	0.409842	-0.0522261	-0.0537807	hypomethylation	hypomethylation	0.0253621	0.0309573	0.0131418	0.0203971
cg05204095	0.501187	0.449461	0.447452	-0.0517265	-0.0537357	hypomethylation	hypomethylation	0.0344358	0.0382906	0.0437294	0.047967
cg05213296	0.379697	0.301056	0.293582	-0.0786409	-0.0861155	hypomethylation	hypomethylation	0.044577	0.0464935	0.0155375	0.022748
cg05250352	0.946295	0.882647	0.881443	-0.0636477	-0.064852	hypomethylation	hypomethylation	0.0010929	0.00773942	0.00306537	0.00926889
cg05278780	0.677588	0.581459	0.553493	-0.0961289	-0.124096	hypomethylation	hypomethylation	0.00544334	0.01336	0.00311254	0.00935004
cg05290582	0.476616	0.42267	0.418165	-0.0539452	-0.0584509	hypomethylation	hypomethylation	0.00296511	0.0106808	0.0038052	0.0102768
cg05291677	0.827931	0.883566	0.895469	0.055635	0.0675376	hypermethylation	hypermethylation	0.00721543	0.0152148	0.00502066	0.0118246
cg05310160	0.624144	0.700149	0.690925	0.0760044	0.0667813	hypermethylation	hypermethylation	0.00144849	0.00847923	0.00980106	0.0171076
cg05318186	0.515357	0.458575	0.447074	-0.0567822	-0.068283	hypomethylation	hypomethylation	0.00108659	0.00772377	0.000374239	0.00436103
cg05371159	0.320298	0.267325	0.249583	-0.0529729	-0.0707156	hypomethylation	hypomethylation	0.00347851	0.0113825	0.000312881	0.00414967
cg05392610	0.916458	0.862305	0.861376	-0.0541532	-0.055082	hypomethylation	hypomethylation	0.000770555	0.0069826	0.00268253	0.00871317
cg05403689	0.735572	0.79194	0.798414	0.056368	0.0628427	hypermethylation	hypermethylation	0.00538731	0.0133247	0.003432	0.00979335
cg05404236	0.277938	0.345222	0.342239	0.0672835	0.0643005	hypermethylation	hypermethylation	0.00222783	0.00977469	0.00863507	0.015824
cg05406923	0.35121	0.286794	0.272454	-0.0644153	-0.0787558	hypomethylation	hypomethylation	0.0165124	0.0237383	0.00384303	0.0103015
cg05408873	0.954988	0.89658	0.898899	-0.0584078	-0.056089	hypomethylation	hypomethylation	0.0133586	0.0208436	0.0077695	0.0148547
cg05446675	0.529522	0.473355	0.461184	-0.0561674	-0.0683388	hypomethylation	hypomethylation	0.00778196	0.0158466	0.00402275	0.0105571
cg05449874	0.525579	0.46517	0.469164	-0.0604089	-0.0564145	hypomethylation	hypomethylation	0.0178499	0.0248567	0.0331049	0.0387076
cg05474006	0.755985	0.697626	0.690063	-0.0583587	-0.0659224	hypomethylation	hypomethylation	0.000579865	0.00650221	0.000297442	0.00410917
cg05478821	0.787764	0.842649	0.866421	0.0548854	0.0786571	hypermethylation	hypermethylation	0.0440378	0.0460263	0.00622473	0.0131861
cg05513735	0.415711	0.351577	0.330735	-0.0641338	-0.084976	hypomethylation	hypomethylation	0.00275626	0.0104258	0.00139457	0.00693324
cg05514909	0.425061	0.481415	0.488556	0.0563536	0.0634953	hypermethylation	hypermethylation	0.0176934	0.0247078	0.0311237	0.0371271
cg05518370	0.642151	0.585418	0.579862	-0.0567325	-0.0622891	hypomethylation	hypomethylation	0.00627693	0.0141826	0.00651476	0.0134194
cg05570783	0.65087	0.7069	0.718347	0.0560298	0.0674769	hypermethylation	hypermethylation	0.00565525	0.0135798	0.000959541	0.00598078
cg05700860	0.612491	0.556444	0.540658	-0.0560468	-0.071833	hypomethylation	hypomethylation	0.0310953	0.0354799	0.00646309	0.0133811
cg05733557	0.903902	0.852899	0.84262	-0.0510036	-0.061282	hypomethylation	hypomethylation	0.00866187	0.0168159	0.00436626	0.0110348
cg05766510	0.709983	0.783449	0.765261	0.0734655	0.0552776	hypermethylation	hypermethylation	0.000784875	0.0069826	0.0241772	0.0308084
cg05784098	0.716058	0.657792	0.639496	-0.0582663	-0.0765618	hypomethylation	hypomethylation	0.0106799	0.0185703	0.000263833	0.00392173
cg05796475	0.452117	0.384018	0.388366	-0.0680996	-0.0637515	hypomethylation	hypomethylation	0.00613262	0.0140532	0.00802841	0.0151407
cg05811998	0.379455	0.319163	0.317623	-0.0602915	-0.0618321	hypomethylation	hypomethylation	0.00136133	0.0082168	0.00384	0.0103015
cg05840541	0.281648	0.229864	0.219401	-0.051784	-0.0622468	hypomethylation	hypomethylation	0.00156502	0.00873074	0.000716314	0.00533002
cg05844977	0.749947	0.693555	0.693872	-0.0563912	-0.0560742	hypomethylation	hypomethylation	0.0017271	0.0090469	0.00169332	0.00739498
cg05845376	0.68272	0.73706	0.764886	0.0543401	0.0821662	hypermethylation	hypermethylation	0.0288824	0.033785	0.0102072	0.0175594
cg05869737	0.575708	0.515422	0.512325	-0.0602854	-0.063383	hypomethylation	hypomethylation	0.0144124	0.0217417	0.01734	0.0245529
cg05907464	0.645634	0.581939	0.557597	-0.0636947	-0.0880368	hypomethylation	hypomethylation	0.0482636	0.0494393	0.0196638	0.0266512
cg05940452	0.501649	0.578791	0.565714	0.0771417	0.0640651	hypermethylation	hypermethylation	0.00244665	0.00995302	0.0259299	0.0324587
cg05971072	0.872774	0.811504	0.781749	-0.0612699	-0.0910248	hypomethylation	hypomethylation	0.00460929	0.0123427	0.000157292	0.00342921
cg05974501	0.831409	0.779616	0.768931	-0.0517934	-0.0624782	hypomethylation	hypomethylation	0.0111588	0.0190433	0.0220963	0.0289266
cg05995465	0.868895	0.706105	0.688228	-0.16279	-0.180667	hypomethylation	hypomethylation	0.0288619	0.033785	0.0182452	0.0253794
cg06012263	0.467774	0.417628	0.404276	-0.0501464	-0.0634989	hypomethylation	hypomethylation	0.023512	0.0294981	0.0220206	0.028869
cg06047130	0.92649	0.867995	0.866599	-0.058495	-0.0598903	hypomethylation	hypomethylation	0.0209871	0.0275354	0.0199757	0.0269566
cg06139856	0.460858	0.274934	0.268419	-0.185924	-0.192439	hypomethylation	hypomethylation	0.0104325	0.0184064	0.0209743	0.0278349
cg06174561	0.442328	0.39142	0.382051	-0.0509077	-0.0602769	hypomethylation	hypomethylation	0.0307934	0.0352984	0.0266616	0.0331252
cg06178383	0.493521	0.436112	0.442341	-0.0574095	-0.0511805	hypomethylation	hypomethylation	0.00430902	0.0120521	0.0347152	0.0399896
cg06203181	0.492657	0.434087	0.421737	-0.0585695	-0.0709197	hypomethylation	hypomethylation	0.0193415	0.0262217	0.0460583	0.0499834
cg06218095	0.70934	0.622638	0.61847	-0.0867012	-0.0908693	hypomethylation	hypomethylation	0.0115069	0.0192138	0.0231947	0.0298596
cg06278181	0.909957	0.85689	0.853025	-0.0530674	-0.0569321	hypomethylation	hypomethylation	0.0254662	0.0310693	0.0116328	0.0189198
cg06286127	0.776215	0.721212	0.715196	-0.0550028	-0.0610189	hypomethylation	hypomethylation	0.00458623	0.0123427	0.0112844	0.0186179
cg06288552	0.80955	0.744429	0.732601	-0.0651219	-0.0769493	hypomethylation	hypomethylation	0.00489936	0.0126925	0.00114314	0.00634436
cg06300892	0.711451	0.654962	0.658514	-0.0564894	-0.0529374	hypomethylation	hypomethylation	0.012974	0.0204968	0.0438003	0.0480073
cg06305962	0.629325	0.717554	0.723615	0.0882294	0.0942901	hypermethylation	hypermethylation	0.00558613	0.0135236	0.00348809	0.0098656
cg06307913	0.366144	0.296941	0.301667	-0.0692027	-0.0644772	hypomethylation	hypomethylation	0.0123696	0.0199542	0.0399077	0.0446314
cg06310844	0.327058	0.270593	0.263983	-0.0564647	-0.0630752	hypomethylation	hypomethylation	5.97538e-06	0.0016751	1.50798e-07	0.000127134
cg06311934	0.844485	0.787545	0.775109	-0.0569398	-0.0693766	hypomethylation	hypomethylation	0.00102571	0.00752456	0.00114425	0.00634436
cg06365016	0.764572	0.841015	0.823938	0.0764426	0.0593655	hypermethylation	hypermethylation	0.00118675	0.00792126	0.0256563	0.0322098
cg06446551	0.856902	0.806069	0.793255	-0.0508326	-0.0636472	hypomethylation	hypomethylation	0.0069697	0.0149529	0.0174308	0.0246246
cg06462970	0.542547	0.457136	0.467714	-0.0854107	-0.0748329	hypomethylation	hypomethylation	0.00101392	0.00752456	0.00518314	0.0120653
cg06484146	0.281889	0.228524	0.20687	-0.0533647	-0.0750188	hypomethylation	hypomethylation	0.0478384	0.0491235	0.00900663	0.0162108
cg06540278	0.781888	0.72624	0.718533	-0.0556484	-0.0633554	hypomethylation	hypomethylation	9.88895e-05	0.00346525	2.63991e-05	0.00178455
cg06550582	0.620897	0.564434	0.55837	-0.0564627	-0.0625266	hypomethylation	hypomethylation	0.0313248	0.0356967	0.0220618	0.0288881
cg06575863	0.92052	0.853647	0.855438	-0.0668732	-0.0650821	hypomethylation	hypomethylation	0.0156889	0.0229334	0.0185884	0.0256782
cg06584784	0.774951	0.715835	0.705348	-0.0591164	-0.069603	hypomethylation	hypomethylation	0.0236397	0.029583	0.00842841	0.0156269
cg06595479	0.407436	0.477975	0.469483	0.070539	0.0620469	hypermethylation	hypermethylation	0.00068582	0.00672842	0.00824238	0.0153889
cg06600444	0.695488	0.558819	0.535558	-0.136669	-0.15993	hypomethylation	hypomethylation	0.000576659	0.00649513	0.000187445	0.00352963
cg06604589	0.292682	0.236925	0.238274	-0.0557568	-0.0544075	hypomethylation	hypomethylation	0.000993346	0.00752456	0.00628026	0.0132176
cg06636551	0.278335	0.218729	0.198957	-0.0596058	-0.0793779	hypomethylation	hypomethylation	0.0306762	0.035196	0.00602812	0.0129793
cg06639609	0.857123	0.806935	0.798217	-0.0501877	-0.0589062	hypomethylation	hypomethylation	0.00592822	0.0138243	0.00059055	0.00505967
cg06658912	0.748943	0.684331	0.691075	-0.0646124	-0.0578687	hypomethylation	hypomethylation	0.0200292	0.0268394	0.0369454	0.04204
cg06669598	0.70653	0.613281	0.593389	-0.0932485	-0.11314	hypomethylation	hypomethylation	2.45942e-05	0.00252693	1.51098e-05	0.00147251
cg06671087	0.537648	0.453415	0.475362	-0.0842329	-0.0622863	hypomethylation	hypomethylation	0.000203371	0.00470738	0.0119462	0.0192507
cg06673020	0.848151	0.787678	0.755477	-0.0604739	-0.0926746	hypomethylation	hypomethylation	0.00454602	0.0123197	9.23094e-05	0.00284303
cg06680863	0.682635	0.607458	0.618074	-0.0751766	-0.0645605	hypomethylation	hypomethylation	0.00643438	0.0143148	0.0176539	0.0248343
cg06683094	0.641268	0.58782	0.582575	-0.0534488	-0.0586932	hypomethylation	hypomethylation	0.0304538	0.0350364	0.0110502	0.0184159
cg06686789	0.594178	0.543775	0.537501	-0.0504026	-0.0566771	hypomethylation	hypomethylation	0.0152001	0.0225454	0.0186148	0.0256893
cg06728252	0.65498	0.720083	0.757933	0.0651028	0.102953	hypermethylation	hypermethylation	0.0223328	0.0286485	0.0017302	0.0074629
cg06731572	0.767072	0.715626	0.715853	-0.0514459	-0.0512197	hypomethylation	hypomethylation	0.00372236	0.0114806	0.0142437	0.0215347
cg06745968	0.920175	0.862902	0.858295	-0.0572734	-0.0618799	hypomethylation	hypomethylation	0.0039752	0.0116665	0.00902794	0.0162231
cg06749803	0.298914	0.388215	0.384061	0.0893008	0.085147	hypermethylation	hypermethylation	0.000954779	0.00751735	0.00138264	0.00690459
cg06760111	0.377394	0.320274	0.316359	-0.0571203	-0.0610351	hypomethylation	hypomethylation	0.0258743	0.0313248	0.0117058	0.0190054
cg06815731	0.884401	0.830739	0.833102	-0.0536623	-0.0512994	hypomethylation	hypomethylation	0.0100051	0.0179282	0.0278803	0.034177
cg06820364	0.904157	0.843154	0.853699	-0.0610026	-0.0504581	hypomethylation	hypomethylation	0.000350982	0.00567921	0.00245445	0.00849431
cg06836032	0.726343	0.673525	0.669188	-0.0528179	-0.057155	hypomethylation	hypomethylation	0.0189955	0.0259478	0.0120392	0.0193393
cg06847624	0.50175	0.552509	0.561814	0.0507591	0.0600644	hypermethylation	hypermethylation	0.019408	0.0262696	0.0422891	0.0466888
cg06850787	0.748386	0.831565	0.834713	0.0831793	0.0863268	hypermethylation	hypermethylation	0.000787167	0.0069826	0.00223466	0.00818873
cg06867361	0.343663	0.286993	0.290367	-0.0566695	-0.0532955	hypomethylation	hypomethylation	0.00649875	0.0143914	0.00971382	0.0169977
cg06928346	0.319161	0.3755	0.386888	0.0563391	0.0677272	hypermethylation	hypermethylation	0.00244305	0.00995302	0.000125465	0.00318127
cg06931941	0.46036	0.510978	0.511901	0.0506182	0.0515417	hypermethylation	hypermethylation	0.00183906	0.00916986	0.00531914	0.0122344
cg06945179	0.869434	0.818824	0.803586	-0.05061	-0.0658479	hypomethylation	hypomethylation	0.011837	0.0195194	0.000176012	0.00350402
cg06947608	0.559539	0.464609	0.433428	-0.09493	-0.126111	hypomethylation	hypomethylation	0.000146015	0.0040043	2.21031e-06	0.00057795
cg06961429	0.783642	0.717368	0.719442	-0.0662743	-0.0642002	hypomethylation	hypomethylation	0.00317585	0.010812	0.00463045	0.0114155
cg06965839	0.525834	0.452701	0.466683	-0.0731323	-0.0591509	hypomethylation	hypomethylation	0.00705892	0.0150549	0.0225689	0.0293464
cg07003993	0.468466	0.407461	0.395981	-0.0610045	-0.0724844	hypomethylation	hypomethylation	0.00110891	0.00775568	0.000167518	0.00350187
cg07015465	0.920387	0.869847	0.866009	-0.0505396	-0.0543779	hypomethylation	hypomethylation	0.00854533	0.0166872	0.00291156	0.00904696
cg07019386	0.764599	0.696753	0.659446	-0.0678463	-0.105153	hypomethylation	hypomethylation	0.00598329	0.0139004	0.000199472	0.00352963
cg07038243	0.4742	0.417268	0.386594	-0.0569316	-0.0876054	hypomethylation	hypomethylation	0.0487585	0.0498653	0.000632783	0.0051916
cg07054208	0.363275	0.310243	0.306258	-0.0530319	-0.0570179	hypomethylation	hypomethylation	0.00400325	0.0116665	0.00786683	0.014967
cg07074575	0.31873	0.241081	0.232464	-0.0776496	-0.0862665	hypomethylation	hypomethylation	0.000176924	0.00425123	0.000310226	0.00414967
cg07120200	0.486537	0.427133	0.432988	-0.0594037	-0.0535493	hypomethylation	hypomethylation	0.0178519	0.0248567	0.0346264	0.0399201
cg07127047	0.718926	0.66149	0.644152	-0.0574361	-0.0747748	hypomethylation	hypomethylation	0.00458797	0.0123427	0.00126642	0.00666267
cg07128846	0.759969	0.708925	0.706193	-0.051044	-0.0537766	hypomethylation	hypomethylation	0.0421111	0.0443617	0.0371441	0.0422061
cg07138399	0.690355	0.788899	0.760721	0.0985436	0.0703657	hypermethylation	hypermethylation	0.000927241	0.00749388	0.0251563	0.0317457
cg07170092	0.780982	0.728476	0.697614	-0.0525064	-0.083368	hypomethylation	hypomethylation	0.00778988	0.0158499	5.11382e-05	0.00247409
cg07201475	0.385703	0.313611	0.306745	-0.0720923	-0.0789579	hypomethylation	hypomethylation	0.00729143	0.0152793	0.00303776	0.00924528
cg07210187	0.866892	0.811252	0.797994	-0.0556403	-0.0688983	hypomethylation	hypomethylation	0.0313582	0.0357186	0.00234672	0.00836845
cg07212142	0.798791	0.739185	0.746698	-0.0596061	-0.0520928	hypomethylation	hypomethylation	0.0112565	0.0190846	0.0320309	0.0378458
cg07216976	0.183926	0.109647	0.108093	-0.0742792	-0.0758334	hypomethylation	hypomethylation	0.00111537	0.00775568	0.00375441	0.0102265
cg07233316	0.596387	0.534272	0.530594	-0.0621151	-0.0657934	hypomethylation	hypomethylation	0.0054451	0.01336	0.00655401	0.0134464
cg07240206	0.268787	0.213146	0.21361	-0.055641	-0.0551769	hypomethylation	hypomethylation	0.000826907	0.00708093	0.00263002	0.00867334
cg07244927	0.518623	0.455725	0.468024	-0.0628984	-0.050599	hypomethylation	hypomethylation	0.0195445	0.0264118	0.0317519	0.0376043
cg07249742	0.885331	0.824647	0.82909	-0.0606841	-0.0562418	hypomethylation	hypomethylation	0.00105283	0.00755489	0.00132704	0.00684657
cg07305537	0.540208	0.479624	0.484291	-0.0605841	-0.0559172	hypomethylation	hypomethylation	0.00889256	0.0170475	0.0389033	0.0437631
cg07336438	0.411434	0.333719	0.328424	-0.0777145	-0.0830101	hypomethylation	hypomethylation	0.000764876	0.0069826	0.00258918	0.00863915
cg07403525	0.486346	0.419825	0.423143	-0.0665209	-0.0632034	hypomethylation	hypomethylation	0.0113426	0.019142	0.0134446	0.0207236
cg07437919	0.403939	0.306893	0.298761	-0.0970465	-0.105179	hypomethylation	hypomethylation	2.01211e-07	0.000187599	9.38818e-07	0.000328762
cg07465864	0.313056	0.262985	0.240701	-0.0500706	-0.0723546	hypomethylation	hypomethylation	0.0201261	0.0268939	0.00150046	0.00710656
cg07509935	0.104753	0.187743	0.162046	0.0829902	0.0572928	hypermethylation	hypermethylation	0.000533887	0.00638695	0.00878653	0.0160072
cg07522661	0.822469	0.767418	0.762311	-0.0550509	-0.0601576	hypomethylation	hypomethylation	0.00989061	0.0178054	0.0121749	0.0194514
cg07526328	0.688101	0.611036	0.576645	-0.0770659	-0.111456	hypomethylation	hypomethylation	0.00841189	0.0165677	0.000223123	0.00364242
cg07530460	0.888742	0.960768	0.962124	0.072026	0.0733818	hypermethylation	hypermethylation	0.00502778	0.0128392	0.0169421	0.0241544
cg07571531	0.497286	0.436759	0.434372	-0.0605273	-0.062914	hypomethylation	hypomethylation	0.0303366	0.0349814	0.0385862	0.043478
cg07575970	0.872791	0.801589	0.786423	-0.0712022	-0.0863679	hypomethylation	hypomethylation	0.00260241	0.0101083	0.00173938	0.00747946
cg07583848	0.876775	0.790742	0.820949	-0.0860332	-0.0558259	hypomethylation	hypomethylation	0.000196802	0.00459752	0.000862247	0.00573359
cg07617736	0.326883	0.275186	0.253413	-0.0516974	-0.07347	hypomethylation	hypomethylation	0.0051665	0.0130216	0.000799252	0.00554234
cg07633530	0.66115	0.585706	0.597805	-0.0754443	-0.0633449	hypomethylation	hypomethylation	0.0014217	0.00842614	0.0174278	0.0246246
cg07641662	0.200248	0.149941	0.129087	-0.050307	-0.0711605	hypomethylation	hypomethylation	0.000395508	0.00612188	3.59156e-07	0.000198165
cg07670421	0.855786	0.79768	0.794389	-0.058106	-0.0613978	hypomethylation	hypomethylation	0.0061747	0.0141165	0.00110048	0.0062834
cg07694864	0.14522	0.220741	0.195526	0.075521	0.0503058	hypermethylation	hypermethylation	0.00080579	0.00705896	0.029127	0.0352709
cg07738651	0.460698	0.391056	0.395537	-0.0696413	-0.0651607	hypomethylation	hypomethylation	0.00101414	0.00752456	0.00272907	0.00877578
cg07778935	0.472757	0.411194	0.414523	-0.0615629	-0.0582344	hypomethylation	hypomethylation	0.0112586	0.0190846	0.0134527	0.0207303
cg07785144	0.765398	0.70727	0.714903	-0.0581281	-0.050495	hypomethylation	hypomethylation	0.00147855	0.00853636	0.0121391	0.0194219
cg07787354	0.741956	0.637846	0.633074	-0.10411	-0.108882	hypomethylation	hypomethylation	8.57621e-07	0.000326991	3.89044e-07	0.000198165
cg07791547	0.250345	0.194222	0.191353	-0.0561228	-0.0589922	hypomethylation	hypomethylation	0.000166588	0.00424547	6.44098e-05	0.0027373
cg07848310	0.202026	0.299813	0.325353	0.0977875	0.123327	hypermethylation	hypermethylation	0.0107104	0.0185986	0.00671572	0.0136383
cg07861198	0.523597	0.455903	0.46765	-0.067694	-0.0559469	hypomethylation	hypomethylation	0.000775173	0.0069826	0.0153574	0.0226084
cg07876788	0.558136	0.459049	0.487361	-0.0990866	-0.0707752	hypomethylation	hypomethylation	0.00735804	0.0153424	0.0296464	0.0357839
cg07883894	0.394655	0.319188	0.301113	-0.0754665	-0.0935419	hypomethylation	hypomethylation	0.000640009	0.00665674	0.00016582	0.00350187
cg07925670	0.445516	0.394242	0.374858	-0.0512742	-0.0706575	hypomethylation	hypomethylation	0.0136297	0.0210194	0.002687	0.00871718
cg07943849	0.811518	0.75607	0.759893	-0.0554487	-0.0516255	hypomethylation	hypomethylation	0.00676239	0.0147209	0.0167681	0.0239734
cg07953867	0.489421	0.406049	0.364155	-0.0833717	-0.125267	hypomethylation	hypomethylation	0.00652287	0.0144108	0.000326801	0.00414967
cg07955367	0.845594	0.78844	0.761042	-0.0571538	-0.0845519	hypomethylation	hypomethylation	0.0257015	0.0312505	0.00204204	0.00788925
cg07968760	0.415	0.485577	0.484089	0.0705774	0.0690896	hypermethylation	hypermethylation	0.0103318	0.0183056	0.0332158	0.0387806
cg07972427	0.652493	0.594824	0.596302	-0.057669	-0.056191	hypomethylation	hypomethylation	0.0151596	0.0225192	0.0231942	0.0298596
cg07978718	0.4575	0.393735	0.381399	-0.0637654	-0.0761006	hypomethylation	hypomethylation	0.0232127	0.0293562	0.0252311	0.0318115
cg08009458	0.934076	0.882493	0.877097	-0.0515836	-0.0569793	hypomethylation	hypomethylation	0.0109509	0.0188504	0.00247543	0.00852891
cg08071142	0.670683	0.602579	0.604005	-0.0681038	-0.0666778	hypomethylation	hypomethylation	0.000936633	0.00749388	0.00261417	0.00866486
cg08078339	0.906183	0.84719	0.839236	-0.0589928	-0.066947	hypomethylation	hypomethylation	0.00151487	0.00860816	0.000814815	0.00560173
cg08096851	0.246679	0.194067	0.182356	-0.052612	-0.0643224	hypomethylation	hypomethylation	0.00111725	0.00775568	0.00016051	0.0034541
cg08106415	0.373197	0.319836	0.313034	-0.0533613	-0.0601629	hypomethylation	hypomethylation	0.0119948	0.0196003	0.00969883	0.0169977
cg08121160	0.313222	0.257283	0.259754	-0.0559391	-0.0534678	hypomethylation	hypomethylation	0.00109511	0.00773942	0.00175796	0.0074886
cg08133496	0.398166	0.346878	0.314742	-0.0512876	-0.083424	hypomethylation	hypomethylation	0.00240503	0.00995302	5.29931e-07	0.0002284
cg08149328	0.150413	0.0981234	0.0910623	-0.05229	-0.0593511	hypomethylation	hypomethylation	0.0169748	0.0242099	0.0141976	0.0214823
cg08173263	0.344782	0.289595	0.294343	-0.0551866	-0.050439	hypomethylation	hypomethylation	0.0102896	0.0182826	0.00646485	0.0133811
cg08173730	0.663488	0.612391	0.602376	-0.0510965	-0.0611118	hypomethylation	hypomethylation	0.0262896	0.0316302	0.0160497	0.0232368
cg08213398	0.663672	0.612154	0.609259	-0.0515188	-0.0544132	hypomethylation	hypomethylation	0.00918005	0.0173395	0.0140177	0.0213137
cg08228850	0.499939	0.434985	0.424476	-0.0649538	-0.075463	hypomethylation	hypomethylation	0.0240825	0.0299458	0.0134286	0.020716
cg08240917	0.904112	0.789429	0.728688	-0.114683	-0.175424	hypomethylation	hypomethylation	0.0231333	0.0292999	0.0020705	0.00792005
cg08254359	0.302836	0.25229	0.231378	-0.0505464	-0.0714583	hypomethylation	hypomethylation	0.0378575	0.0411243	0.00808547	0.0152138
cg08265451	0.831239	0.777409	0.77157	-0.0538301	-0.0596691	hypomethylation	hypomethylation	0.00064858	0.00665674	0.00181989	0.00761529
cg08290471	0.830179	0.778673	0.756727	-0.0515059	-0.0734512	hypomethylation	hypomethylation	0.00568919	0.0135798	0.00670335	0.013633
cg08325413	0.834847	0.777232	0.779547	-0.0576154	-0.0553003	hypomethylation	hypomethylation	0.00395123	0.0116665	0.00449258	0.0112376
cg08328067	0.557662	0.495884	0.496839	-0.0617778	-0.0608227	hypomethylation	hypomethylation	0.00705902	0.0150549	0.0262754	0.0327521
cg08350889	0.364853	0.306524	0.29518	-0.0583293	-0.0696736	hypomethylation	hypomethylation	0.00431835	0.0120521	0.00735332	0.0143506
cg08369164	0.485475	0.431084	0.434977	-0.054392	-0.0504982	hypomethylation	hypomethylation	0.0164352	0.0236749	0.043117	0.0474079
cg08430157	0.84797	0.788222	0.780792	-0.0597479	-0.0671787	hypomethylation	hypomethylation	0.0106297	0.0185213	0.0110653	0.0184301
cg08460875	0.724049	0.672344	0.653861	-0.0517052	-0.0701884	hypomethylation	hypomethylation	0.00738367	0.0153686	0.00064484	0.0051916
cg08473764	0.821145	0.889078	0.894821	0.0679329	0.0736764	hypermethylation	hypermethylation	0.00025772	0.00500174	6.94287e-05	0.0027408
cg08483768	0.562298	0.48967	0.485742	-0.0726282	-0.0765558	hypomethylation	hypomethylation	0.000252527	0.00500174	0.000345187	0.00422707
cg08490751	0.44297	0.512911	0.512928	0.069941	0.0699575	hypermethylation	hypermethylation	0.00631963	0.0142032	0.0389049	0.0437631
cg08563318	0.705711	0.645317	0.636371	-0.0603935	-0.0693399	hypomethylation	hypomethylation	0.00587941	0.013786	0.00958071	0.0168822
cg08633479	0.639258	0.713744	0.709064	0.0744853	0.0698053	hypermethylation	hypermethylation	0.00362053	0.0114567	0.0160294	0.0232195
cg08644860	0.601462	0.545148	0.539844	-0.0563136	-0.0616182	hypomethylation	hypomethylation	0.0025234	0.00995302	0.00443409	0.0111359
cg08671460	0.233521	0.180935	0.17556	-0.0525862	-0.0579607	hypomethylation	hypomethylation	0.000689863	0.00672842	0.000141936	0.00328623
cg08687025	0.483092	0.42958	0.405997	-0.053512	-0.0770946	hypomethylation	hypomethylation	0.0418067	0.0442192	0.004359	0.0110214
cg08749656	0.554704	0.496121	0.493986	-0.0585825	-0.0607175	hypomethylation	hypomethylation	0.031095	0.0354799	0.0185689	0.0256639
cg08770311	0.825072	0.756307	0.722883	-0.0687652	-0.102189	hypomethylation	hypomethylation	0.0126516	0.0202796	0.000547378	0.00494671
cg08776296	0.844648	0.705848	0.744758	-0.1388	-0.09989	hypomethylation	hypomethylation	0.00732473	0.0153143	0.0262219	0.032727
cg08866497	0.641482	0.58526	0.582438	-0.0562218	-0.0590442	hypomethylation	hypomethylation	0.0150852	0.0224543	0.00205279	0.00790501
cg08874599	0.812731	0.751907	0.758082	-0.0608235	-0.0546487	hypomethylation	hypomethylation	0.000452844	0.00620938	0.000593774	0.00506574
cg08914627	0.788903	0.732915	0.706314	-0.0559871	-0.0825888	hypomethylation	hypomethylation	0.0113237	0.0191337	0.000221543	0.0036402
cg08946103	0.474027	0.41787	0.415607	-0.0561575	-0.0584205	hypomethylation	hypomethylation	0.0403765	0.0430922	0.0365389	0.0417238
cg08967338	0.354292	0.290968	0.283838	-0.0633244	-0.0704545	hypomethylation	hypomethylation	0.0117618	0.0194928	0.0320818	0.0378589
cg08984179	0.818043	0.762911	0.738864	-0.0551312	-0.0791783	hypomethylation	hypomethylation	0.00190047	0.00929705	3.93878e-05	0.00214262
cg09036531	0.582572	0.513504	0.515756	-0.0690686	-0.0668159	hypomethylation	hypomethylation	3.5679e-05	0.00264759	6.44876e-05	0.0027373
cg09044981	0.77054	0.693871	0.696377	-0.0766685	-0.0741623	hypomethylation	hypomethylation	0.0230227	0.0292773	0.0352072	0.040498
cg09045363	0.202624	0.148895	0.151843	-0.0537296	-0.0507815	hypomethylation	hypomethylation	0.0125597	0.0201578	0.0243623	0.030981
cg09057685	0.485936	0.434032	0.411294	-0.0519033	-0.0746418	hypomethylation	hypomethylation	0.016996	0.0242128	0.00166339	0.00735594
cg09085358	0.540886	0.485011	0.478772	-0.0558748	-0.0621142	hypomethylation	hypomethylation	0.00201727	0.00945841	0.0100081	0.0173484
cg09085594	0.638321	0.579863	0.580359	-0.0584578	-0.0579619	hypomethylation	hypomethylation	0.00756261	0.0155714	0.0175901	0.0247756
cg09101205	0.54271	0.466303	0.478577	-0.0764068	-0.0641326	hypomethylation	hypomethylation	0.00276228	0.010433	0.0150903	0.0223207
cg09107055	0.513051	0.441828	0.44267	-0.0712227	-0.070381	hypomethylation	hypomethylation	0.00274641	0.0104042	0.00602981	0.0129793
cg09109730	0.558383	0.498988	0.491096	-0.0593948	-0.0672867	hypomethylation	hypomethylation	0.019211	0.0261344	0.0318617	0.037702
cg09136950	0.542214	0.491544	0.472072	-0.0506703	-0.0701427	hypomethylation	hypomethylation	0.0270662	0.0321506	0.000998192	0.00604635
cg09150734	0.927749	0.863324	0.87013	-0.064425	-0.0576194	hypomethylation	hypomethylation	0.00823428	0.0163971	0.000838402	0.00567829
cg09233300	0.943609	0.88551	0.869521	-0.0580994	-0.0740887	hypomethylation	hypomethylation	0.00316329	0.010812	0.000397228	0.00446026
cg09234764	0.633354	0.571819	0.564357	-0.0615348	-0.0689972	hypomethylation	hypomethylation	0.0110872	0.0189776	0.0137225	0.0210132
cg09256477	0.722284	0.650832	0.64659	-0.0714519	-0.0756933	hypomethylation	hypomethylation	0.000147798	0.0040096	9.85527e-05	0.00288861
cg09317728	0.435262	0.359402	0.380812	-0.0758603	-0.054451	hypomethylation	hypomethylation	0.000285048	0.00518472	0.0293902	0.0355435
cg09319063	0.51479	0.456758	0.439272	-0.0580322	-0.0755181	hypomethylation	hypomethylation	0.000667521	0.00665674	0.00134347	0.00685334
cg09351848	0.887744	0.830954	0.825359	-0.0567901	-0.062385	hypomethylation	hypomethylation	0.00101244	0.00752456	0.000550722	0.00496093
cg09366265	0.224215	0.169178	0.158977	-0.0550371	-0.0652384	hypomethylation	hypomethylation	0.000632343	0.00665674	0.000124499	0.00318127
cg09381706	0.885355	0.819646	0.821494	-0.0657097	-0.0638609	hypomethylation	hypomethylation	0.000642283	0.00665674	0.00122623	0.00657469
cg09389201	0.702162	0.650478	0.649255	-0.0516839	-0.0529068	hypomethylation	hypomethylation	0.000941561	0.00749388	0.0167232	0.0239337
cg09390319	0.528119	0.584886	0.608506	0.0567673	0.0803876	hypermethylation	hypermethylation	0.0117488	0.0194886	0.00158413	0.00723579
cg09396832	0.828365	0.7689	0.768356	-0.0594652	-0.0600095	hypomethylation	hypomethylation	0.0039336	0.0116665	0.0144536	0.0217113
cg09415825	0.280966	0.227843	0.22366	-0.053123	-0.0573059	hypomethylation	hypomethylation	0.00975159	0.0177129	0.00700508	0.0139391
cg09489435	0.633691	0.556769	0.551756	-0.0769229	-0.0819352	hypomethylation	hypomethylation	0.00973245	0.0177129	0.00917754	0.0164287
cg09508668	0.617718	0.551096	0.561165	-0.0666215	-0.0565524	hypomethylation	hypomethylation	0.00896698	0.0171262	0.0457538	0.0497204
cg09552548	0.417444	0.352371	0.300983	-0.0650729	-0.116461	hypomethylation	hypomethylation	0.0352475	0.0389529	0.000333762	0.0041836
cg09584060	0.840271	0.77605	0.774462	-0.0642203	-0.0658092	hypomethylation	hypomethylation	0.000914627	0.00746797	0.000367739	0.00435243
cg09613853	0.891696	0.819351	0.805033	-0.0723454	-0.0866634	hypomethylation	hypomethylation	0.00584481	0.0137453	0.00176738	0.00750965
cg09624870	0.581137	0.518498	0.493363	-0.0626389	-0.0877742	hypomethylation	hypomethylation	0.000955759	0.00751735	2.71672e-05	0.00181211
cg09652312	0.523312	0.597193	0.609494	0.0738803	0.086182	hypermethylation	hypermethylation	0.00426076	0.0120067	0.00160501	0.00726072
cg09657260	0.750791	0.692187	0.688946	-0.0586039	-0.0618453	hypomethylation	hypomethylation	0.0105134	0.0184552	0.00171834	0.00744615
cg09678707	0.733494	0.681116	0.682402	-0.0523789	-0.0510929	hypomethylation	hypomethylation	0.0118649	0.0195194	0.0313633	0.0373097
cg09737019	0.566169	0.50527	0.48295	-0.060899	-0.0832191	hypomethylation	hypomethylation	0.0084956	0.0166546	0.00196572	0.00778403
cg09739413	0.544082	0.607581	0.618321	0.0634983	0.0742384	hypermethylation	hypermethylation	0.0442835	0.0462447	0.0221797	0.0290019
cg09756125	0.735613	0.586125	0.593881	-0.149488	-0.141732	hypomethylation	hypomethylation	0.0101939	0.018189	0.0362557	0.0414997
cg09765747	0.467243	0.404235	0.392471	-0.0630073	-0.0747717	hypomethylation	hypomethylation	0.000708272	0.00679457	0.000752167	0.00544803
cg09770131	0.623116	0.718059	0.696582	0.0949425	0.0734658	hypermethylation	hypermethylation	0.000435868	0.00613812	0.0147727	0.0220547
cg09792000	0.479267	0.383868	0.411917	-0.0953992	-0.0673504	hypomethylation	hypomethylation	0.000116486	0.00372017	0.00987934	0.0172014
cg09802689	0.939386	0.888117	0.875022	-0.0512687	-0.0643632	hypomethylation	hypomethylation	0.0317621	0.0360647	0.00409004	0.0106419
cg09811860	0.548937	0.491907	0.48229	-0.0570299	-0.0666468	hypomethylation	hypomethylation	0.00354135	0.011411	0.00733477	0.0143244
cg09864245	0.251349	0.193692	0.17801	-0.057657	-0.0733392	hypomethylation	hypomethylation	0.00359772	0.0114567	0.00038722	0.00441873
cg09928736	0.869879	0.80979	0.800412	-0.0600892	-0.0694668	hypomethylation	hypomethylation	0.00545894	0.01336	0.00161353	0.00726072
cg10012448	0.75635	0.693921	0.682057	-0.0624286	-0.0742927	hypomethylation	hypomethylation	0.000623512	0.00665674	0.00216762	0.00810218
cg10072237	0.237507	0.162043	0.15308	-0.0754634	-0.084427	hypomethylation	hypomethylation	0.0381206	0.0413315	0.0279412	0.0342242
cg10092265	0.458793	0.515005	0.511256	0.0562122	0.0524629	hypermethylation	hypermethylation	0.00287003	0.0105814	0.0207175	0.0276578
cg10123347	0.178637	0.122096	0.0926206	-0.0565414	-0.0860165	hypomethylation	hypomethylation	8.81641e-05	0.00334566	3.78739e-08	5.07249e-05
cg10162971	0.838916	0.763996	0.73404	-0.07492	-0.104876	hypomethylation	hypomethylation	0.00144002	0.00846892	8.88624e-05	0.00284303
cg10185505	0.756309	0.852683	0.866115	0.0963743	0.109806	hypermethylation	hypermethylation	0.0310579	0.0354799	0.0428893	0.047212
cg10210594	0.112006	0.181858	0.214786	0.0698517	0.10278	hypermethylation	hypermethylation	0.0131807	0.0206938	0.000958782	0.00598078
cg10214754	0.751231	0.687717	0.683869	-0.0635138	-0.0673615	hypomethylation	hypomethylation	0.0206493	0.0272622	0.0422591	0.0466711
cg10231049	0.493806	0.44174	0.419457	-0.0520662	-0.0743489	hypomethylation	hypomethylation	0.0111739	0.0190444	0.00137539	0.0068834
cg10238051	0.757762	0.808642	0.820312	0.0508803	0.0625498	hypermethylation	hypermethylation	0.0314297	0.0357839	0.0273176	0.0336989
cg10249983	0.449741	0.607905	0.580049	0.158165	0.130309	hypermethylation	hypermethylation	0.00125855	0.00811527	0.032074	0.0378578
cg10276968	0.187598	0.134339	0.10593	-0.0532588	-0.081668	hypomethylation	hypomethylation	0.00841058	0.0165677	8.17545e-05	0.00284303
cg10302336	0.48803	0.434651	0.421274	-0.0533789	-0.0667555	hypomethylation	hypomethylation	2.49567e-05	0.00252693	3.6705e-06	0.000747876
cg10319545	0.842786	0.788638	0.786556	-0.0541479	-0.0562297	hypomethylation	hypomethylation	0.0255005	0.031081	0.0150572	0.0222996
cg10330056	0.36547	0.31422	0.309833	-0.0512504	-0.0556368	hypomethylation	hypomethylation	0.0359333	0.0394866	0.0380659	0.0430267
cg10331082	0.587868	0.537358	0.537165	-0.0505097	-0.0507027	hypomethylation	hypomethylation	0.00326319	0.0110067	0.0147529	0.0220369
cg10335112	0.770639	0.720354	0.713668	-0.0502852	-0.0569715	hypomethylation	hypomethylation	0.000445041	0.00613812	8.73338e-05	0.00284303
cg10351795	0.642295	0.576141	0.589326	-0.0661542	-0.0529695	hypomethylation	hypomethylation	1.67431e-05	0.00242755	0.00106388	0.00622228
cg10403849	0.418126	0.362253	0.344518	-0.0558733	-0.0736085	hypomethylation	hypomethylation	0.0189451	0.025925	0.000972911	0.00598378
cg10410412	0.762557	0.712238	0.695448	-0.0503191	-0.0671092	hypomethylation	hypomethylation	0.0296391	0.034413	0.00794003	0.015045
cg10454127	0.588871	0.537717	0.533677	-0.051154	-0.0551939	hypomethylation	hypomethylation	0.00385464	0.0116192	0.00339133	0.00976076
cg10478584	0.345061	0.280656	0.270947	-0.0644041	-0.0741131	hypomethylation	hypomethylation	0.0026839	0.0103067	0.0013694	0.0068834
cg10506618	0.569468	0.449115	0.424078	-0.120354	-0.14539	hypomethylation	hypomethylation	9.07228e-07	0.000326991	1.81523e-07	0.000127134
cg10531352	0.769213	0.699267	0.689928	-0.0699457	-0.079285	hypomethylation	hypomethylation	0.000766738	0.0069826	0.000328736	0.00414967
cg10578782	0.639533	0.576536	0.56342	-0.0629975	-0.0761132	hypomethylation	hypomethylation	0.0173108	0.0244535	0.00945508	0.0167408
cg10580144	0.0971299	0.147474	0.151103	0.0503437	0.0539731	hypermethylation	hypermethylation	0.00384525	0.0116186	0.00131788	0.00683081
cg10587895	0.815469	0.752981	0.744159	-0.062488	-0.0713099	hypomethylation	hypomethylation	0.00259454	0.0101019	0.00161335	0.00726072
cg10604476	0.469246	0.543149	0.564555	0.0739027	0.095309	hypermethylation	hypermethylation	0.0387502	0.0418735	0.0083737	0.0155644
cg10609256	0.707783	0.64244	0.621232	-0.0653437	-0.0865511	hypomethylation	hypomethylation	0.0238057	0.0296895	0.00127669	0.00669158
cg10639395	0.368442	0.303759	0.280499	-0.0646834	-0.0879428	hypomethylation	hypomethylation	0.00727384	0.0152678	0.000529145	0.00488183
cg10643333	0.718724	0.662083	0.663856	-0.0566408	-0.0548671	hypomethylation	hypomethylation	0.00148526	0.00855551	0.00231935	0.0083571
cg10650127	0.75009	0.695554	0.69231	-0.0545366	-0.0577807	hypomethylation	hypomethylation	0.00122255	0.0080535	0.00299593	0.00916276
cg10665071	0.840404	0.917335	0.939535	0.0769312	0.0991311	hypermethylation	hypermethylation	0.0357265	0.0393101	0.00838167	0.0155687
cg10678190	0.723427	0.652475	0.665543	-0.0709519	-0.0578841	hypomethylation	hypomethylation	0.00289804	0.0105814	0.0346082	0.0399156
cg10694470	0.305643	0.244005	0.248635	-0.061638	-0.0570087	hypomethylation	hypomethylation	0.0113891	0.0191693	0.038963	0.0438109
cg10719029	0.229064	0.175752	0.171648	-0.0533125	-0.0574156	hypomethylation	hypomethylation	0.00200347	0.00945841	0.00378929	0.0102768
cg10757433	0.374585	0.319413	0.32031	-0.0551722	-0.0542753	hypomethylation	hypomethylation	0.00110701	0.00775568	0.00135504	0.00685427
cg10773372	0.867382	0.815698	0.81043	-0.0516836	-0.0569516	hypomethylation	hypomethylation	0.00499232	0.0127926	0.00307777	0.00928314
cg10786767	0.541063	0.47297	0.482045	-0.0680926	-0.0590178	hypomethylation	hypomethylation	0.00713755	0.0150948	0.0181229	0.0252783
cg10815657	0.64643	0.714582	0.71677	0.0681513	0.0703401	hypermethylation	hypermethylation	0.0211148	0.0276194	0.033678	0.0391403
cg10821226	0.286884	0.339249	0.358529	0.0523644	0.0716444	hypermethylation	hypermethylation	0.0134881	0.0209032	0.00426624	0.0108802
cg10846936	0.65247	0.586742	0.572604	-0.065728	-0.079867	hypomethylation	hypomethylation	0.00104105	0.00752599	2.60235e-05	0.00178455
cg10940023	0.469923	0.417926	0.406952	-0.0519973	-0.0629717	hypomethylation	hypomethylation	0.00695695	0.0149529	0.00461401	0.0114036
cg10995206	0.746148	0.686263	0.681751	-0.0598847	-0.064397	hypomethylation	hypomethylation	0.000621767	0.00665674	0.000965583	0.00598078
cg11003530	0.408361	0.353537	0.35475	-0.0548239	-0.0536108	hypomethylation	hypomethylation	0.0172628	0.0244411	0.0356097	0.0408687
cg11003814	0.350031	0.285472	0.252988	-0.0645584	-0.0970429	hypomethylation	hypomethylation	0.0145153	0.0218424	0.00181881	0.00761529
cg11015251	0.39342	0.454992	0.470645	0.0615714	0.0772246	hypermethylation	hypermethylation	0.00369152	0.0114567	0.00148152	0.00708878
cg11028443	0.914494	0.85144	0.853286	-0.0630538	-0.0612078	hypomethylation	hypomethylation	0.000546802	0.00638695	0.000174055	0.00350187
cg11075718	0.639131	0.576774	0.558586	-0.0623576	-0.0805456	hypomethylation	hypomethylation	0.00724254	0.0152165	0.0227726	0.0295018
cg11077310	0.730071	0.656637	0.671028	-0.0734348	-0.0590436	hypomethylation	hypomethylation	0.00061624	0.00665674	0.00389317	0.0103516
cg11078654	0.925314	0.859712	0.867908	-0.0656022	-0.0574063	hypomethylation	hypomethylation	0.00358789	0.0114567	0.00186297	0.00766951
cg11095247	0.745834	0.687149	0.689638	-0.0586849	-0.056196	hypomethylation	hypomethylation	0.020374	0.02708	0.0165763	0.0237964
cg11096515	0.451429	0.395754	0.373905	-0.0556751	-0.0775232	hypomethylation	hypomethylation	0.0153888	0.0227319	0.00901904	0.0162123
cg11107657	0.501056	0.441318	0.442328	-0.059738	-0.0587278	hypomethylation	hypomethylation	0.00103075	0.00752456	0.00131612	0.00682798
cg11113589	0.327332	0.276696	0.272163	-0.0506363	-0.0551695	hypomethylation	hypomethylation	0.00709813	0.0150807	0.00698113	0.0139349
cg11120805	0.518482	0.464308	0.448301	-0.0541734	-0.0701808	hypomethylation	hypomethylation	0.0234081	0.0294557	0.00275836	0.00881147
cg11123744	0.481249	0.572013	0.541516	0.0907646	0.060267	hypermethylation	hypermethylation	0.000776531	0.0069826	0.0241461	0.0307758
cg11127112	0.671861	0.616924	0.621046	-0.0549366	-0.0508145	hypomethylation	hypomethylation	0.00182831	0.00915462	0.0154537	0.0226846
cg11137145	0.54959	0.498217	0.486271	-0.051373	-0.0633191	hypomethylation	hypomethylation	0.0387533	0.0418735	0.0146613	0.0219352
cg11210069	0.678561	0.580971	0.590733	-0.09759	-0.0878281	hypomethylation	hypomethylation	0.000393913	0.00612188	0.00545099	0.0123902
cg11229771	0.748218	0.811531	0.804099	0.0633134	0.0558818	hypermethylation	hypermethylation	0.00114479	0.00783153	0.0115458	0.0188573
cg11241151	0.704706	0.620651	0.595016	-0.0840551	-0.10969	hypomethylation	hypomethylation	0.00436584	0.0121177	0.00127337	0.00668228
cg11300809	0.416222	0.358125	0.362338	-0.0580969	-0.0538842	hypomethylation	hypomethylation	0.00106794	0.00763292	0.00352878	0.00993226
cg11372818	0.737922	0.789434	0.815508	0.0515126	0.0775862	hypermethylation	hypermethylation	0.0378644	0.0411243	0.00484537	0.0116238
cg11417259	0.529004	0.583521	0.594884	0.054517	0.06588	hypermethylation	hypermethylation	0.00397651	0.0116665	0.00117516	0.00641133
cg11423701	0.829361	0.75497	0.768962	-0.0743901	-0.0603982	hypomethylation	hypomethylation	0.00667637	0.0145865	0.0325348	0.0382316
cg11452700	0.82456	0.76176	0.751189	-0.0627998	-0.0733712	hypomethylation	hypomethylation	0.00103598	0.00752599	0.00203126	0.00788862
cg11456659	0.904895	0.85477	0.83807	-0.0501254	-0.0668252	hypomethylation	hypomethylation	0.000376096	0.00596786	5.78042e-06	0.000928252
cg11462582	0.355624	0.290706	0.283567	-0.0649179	-0.0720566	hypomethylation	hypomethylation	0.000152271	0.00403499	4.40601e-05	0.00230719
cg11524343	0.399542	0.346152	0.334947	-0.0533891	-0.0645943	hypomethylation	hypomethylation	0.0409378	0.0435438	0.0189911	0.0260355
cg11532431	0.745119	0.798615	0.821959	0.0534963	0.0768401	hypermethylation	hypermethylation	0.0381434	0.0413384	0.00681794	0.0137364
cg11540482	0.333788	0.273284	0.266353	-0.0605038	-0.0674352	hypomethylation	hypomethylation	0.0236146	0.0295827	0.0250542	0.0316667
cg11545307	0.899903	0.841979	0.816486	-0.0579247	-0.0834174	hypomethylation	hypomethylation	0.020139	0.0268939	8.08808e-05	0.00284303
cg11564488	0.793156	0.74194	0.736438	-0.0512155	-0.0567179	hypomethylation	hypomethylation	0.0111237	0.0190272	0.0082837	0.0154441
cg11663585	0.923215	0.869394	0.86374	-0.0538211	-0.0594759	hypomethylation	hypomethylation	0.00414013	0.0119153	0.0012451	0.0066083
cg11682605	0.761816	0.700217	0.686195	-0.0615985	-0.0756204	hypomethylation	hypomethylation	0.0109625	0.0188538	0.000896988	0.00582624
cg11721177	0.424944	0.486805	0.480899	0.061861	0.055955	hypermethylation	hypermethylation	0.00137433	0.00825582	0.014794	0.0220616
cg11740865	0.924978	0.87212	0.871624	-0.0528582	-0.0533543	hypomethylation	hypomethylation	0.00207288	0.00952316	0.000409557	0.00451722
cg11741455	0.907921	0.853785	0.845064	-0.054136	-0.0628573	hypomethylation	hypomethylation	0.00336335	0.0111655	0.00429621	0.0109317
cg11749010	0.227963	0.281562	0.29696	0.0535994	0.0689969	hypermethylation	hypermethylation	0.00974175	0.0177129	0.00202445	0.00788862
cg11755269	0.912473	0.861498	0.821351	-0.050975	-0.0911228	hypomethylation	hypomethylation	0.00551136	0.013409	0.000200435	0.00352963
cg11839415	0.652644	0.708293	0.724054	0.0556491	0.0714102	hypermethylation	hypermethylation	0.0172056	0.0244012	0.00636257	0.0132723
cg11852086	0.625716	0.567157	0.571029	-0.0585594	-0.0546872	hypomethylation	hypomethylation	0.0206306	0.0272622	0.0380464	0.0430133
cg11854043	0.861464	0.807764	0.806544	-0.0536993	-0.0549191	hypomethylation	hypomethylation	0.00439296	0.0121555	0.0234654	0.0301069
cg11868947	0.842594	0.893331	0.896658	0.0507369	0.0540639	hypermethylation	hypermethylation	0.00297909	0.0106808	0.00451129	0.0112459
cg11906002	0.767558	0.716358	0.7109	-0.0511997	-0.0566582	hypomethylation	hypomethylation	0.0201425	0.0268939	0.0333839	0.0389153
cg11937920	0.819517	0.762497	0.752208	-0.0570201	-0.0673092	hypomethylation	hypomethylation	0.00662829	0.0145419	0.00823849	0.0153868
cg11957516	0.807268	0.753805	0.737312	-0.0534628	-0.0699558	hypomethylation	hypomethylation	0.0324376	0.0366667	0.00346528	0.00984029
cg12018436	0.275938	0.206599	0.200287	-0.0693387	-0.0756515	hypomethylation	hypomethylation	0.00278252	0.0104622	0.00567111	0.0125613
cg12050576	0.533307	0.457076	0.441844	-0.0762315	-0.0914634	hypomethylation	hypomethylation	0.00855663	0.0166964	0.0115529	0.0188573
cg12060917	0.284618	0.218263	0.22234	-0.066355	-0.0622779	hypomethylation	hypomethylation	0.00180921	0.00914889	0.00546457	0.0123995
cg12064373	0.228897	0.324735	0.31502	0.0958387	0.0861237	hypermethylation	hypermethylation	0.00155207	0.00873074	0.0163117	0.0235189
cg12133118	0.422952	0.363509	0.366892	-0.0594423	-0.0560596	hypomethylation	hypomethylation	0.00135927	0.0082168	0.00281017	0.00888564
cg12224203	0.313972	0.260222	0.245422	-0.0537498	-0.0685502	hypomethylation	hypomethylation	0.0367791	0.0402576	0.00994771	0.0172899
cg12226028	0.290606	0.361855	0.360189	0.0712489	0.0695826	hypermethylation	hypermethylation	0.00228741	0.00980361	0.00346559	0.00984029
cg12232240	0.861543	0.805984	0.791133	-0.0555589	-0.0704096	hypomethylation	hypomethylation	0.011668	0.0193802	0.00344678	0.00980819
cg12244665	0.815424	0.757632	0.756267	-0.0577928	-0.0591572	hypomethylation	hypomethylation	0.00115362	0.00783153	0.0025741	0.00861569
cg12278959	0.254314	0.202732	0.186358	-0.0515814	-0.0679552	hypomethylation	hypomethylation	0.0276327	0.0326697	0.00298662	0.00915986
cg12302982	0.481732	0.536335	0.558196	0.0546026	0.0764637	hypermethylation	hypermethylation	0.0423827	0.044592	0.0147495	0.0220369
cg12333160	0.254943	0.180311	0.186195	-0.0746314	-0.0687472	hypomethylation	hypomethylation	0.0115055	0.0192138	0.0303457	0.0364239
cg12357534	0.701701	0.752609	0.772684	0.050908	0.0709828	hypermethylation	hypermethylation	0.0234788	0.0294859	0.0030618	0.00926889
cg12372401	0.859836	0.788914	0.76712	-0.0709223	-0.092716	hypomethylation	hypomethylation	0.00903502	0.017204	0.000646264	0.0051916
cg12403591	0.558844	0.498672	0.504502	-0.0601718	-0.0543413	hypomethylation	hypomethylation	0.0174993	0.0246103	0.0132506	0.0205274
cg12406108	0.552616	0.4675	0.454608	-0.0851156	-0.098008	hypomethylation	hypomethylation	0.020554	0.0272219	0.040074	0.0447726
cg12417772	0.562468	0.4976	0.470607	-0.0648684	-0.0918608	hypomethylation	hypomethylation	5.27929e-05	0.00318099	4.55024e-06	0.00080573
cg12424249	0.882886	0.826049	0.808675	-0.0568364	-0.074211	hypomethylation	hypomethylation	0.00357172	0.0114567	0.00098258	0.00601534
cg12437115	0.86	0.791235	0.779805	-0.0687646	-0.0801946	hypomethylation	hypomethylation	0.00337619	0.0111933	9.20191e-05	0.00284303
cg12481579	0.812658	0.866743	0.869166	0.0540851	0.0565086	hypermethylation	hypermethylation	0.0058457	0.0137453	0.00931976	0.0165931
cg12508693	0.79532	0.717119	0.734929	-0.0782019	-0.0603918	hypomethylation	hypomethylation	0.00150887	0.00860816	0.00463197	0.0114155
cg12523932	0.332065	0.404347	0.404188	0.0722816	0.0721224	hypermethylation	hypermethylation	0.000844266	0.00717199	0.00109735	0.0062834
cg12650512	0.870428	0.819732	0.8204	-0.0506959	-0.0500279	hypomethylation	hypomethylation	0.0160048	0.0232471	0.0120489	0.0193445
cg12696295	0.664759	0.607294	0.610694	-0.0574644	-0.0540644	hypomethylation	hypomethylation	0.0184958	0.0254167	0.0310778	0.0370961
cg12699274	0.285324	0.218395	0.203084	-0.0669292	-0.0822402	hypomethylation	hypomethylation	0.000739298	0.0069089	0.00066709	0.00523488
cg12742889	0.852775	0.800147	0.789719	-0.0526272	-0.063056	hypomethylation	hypomethylation	0.0172851	0.0244418	0.00505956	0.0118813
cg12744031	0.33795	0.261449	0.228526	-0.0765009	-0.109424	hypomethylation	hypomethylation	0.0418711	0.0442197	0.00695537	0.0139132
cg12765123	0.543816	0.48803	0.450246	-0.0557861	-0.0935706	hypomethylation	hypomethylation	0.0434867	0.0456014	0.00123202	0.00659314
cg12782180	0.453192	0.508351	0.508193	0.0551589	0.0550005	hypermethylation	hypermethylation	0.00236732	0.00995302	0.0139099	0.0212016
cg12810354	0.685898	0.635611	0.623633	-0.0502871	-0.0622658	hypomethylation	hypomethylation	0.0246861	0.0304265	0.0112304	0.0185705
cg12811575	0.483354	0.395488	0.401104	-0.0878666	-0.0822504	hypomethylation	hypomethylation	2.45243e-08	6.18748e-05	4.37104e-07	0.000204091
cg12830829	0.168314	0.115713	0.0991805	-0.052601	-0.0691334	hypomethylation	hypomethylation	1.87315e-05	0.00242755	2.25984e-08	4.22062e-05
cg12837996	0.909067	0.848506	0.831916	-0.0605612	-0.0771512	hypomethylation	hypomethylation	0.00102146	0.00752456	0.00172752	0.00746282
cg12850242	0.368901	0.301781	0.301602	-0.06712	-0.0672989	hypomethylation	hypomethylation	0.00414652	0.0119153	0.00485054	0.0116243
cg12870776	0.813414	0.762853	0.757305	-0.0505604	-0.056109	hypomethylation	hypomethylation	0.0172354	0.0244159	0.0162691	0.0234816
cg12871743	0.840831	0.752945	0.773663	-0.0878858	-0.0671673	hypomethylation	hypomethylation	0.000262838	0.00502379	0.0150798	0.022317
cg12884719	0.563908	0.501693	0.503673	-0.0622157	-0.0602349	hypomethylation	hypomethylation	0.00444749	0.0122373	0.00357374	0.00999184
cg12892016	0.590398	0.539295	0.535677	-0.0511029	-0.0547213	hypomethylation	hypomethylation	0.00962682	0.0176965	0.0180552	0.0251963
cg12894431	0.906928	0.856838	0.819068	-0.0500897	-0.0878603	hypomethylation	hypomethylation	0.0148415	0.0222095	1.13727e-05	0.00130439
cg12919720	0.671704	0.752791	0.752293	0.0810865	0.0805887	hypermethylation	hypermethylation	0.000956429	0.00751735	0.0170561	0.0242799
cg12927641	0.873404	0.811615	0.785925	-0.0617886	-0.087479	hypomethylation	hypomethylation	0.0145892	0.0219098	0.00837298	0.0155644
cg12939989	0.881535	0.830995	0.828324	-0.0505404	-0.053211	hypomethylation	hypomethylation	0.000514638	0.00637693	0.000244487	0.00378415
cg12944343	0.533064	0.450151	0.45257	-0.082913	-0.0804944	hypomethylation	hypomethylation	0.007412	0.015404	0.0226199	0.0293898
cg12957797	0.56839	0.493521	0.481042	-0.0748688	-0.0873479	hypomethylation	hypomethylation	0.0119799	0.0195886	0.00358591	0.0100009
cg12977772	0.243036	0.187642	0.179106	-0.0553939	-0.0639294	hypomethylation	hypomethylation	0.00452641	0.0123195	0.00921058	0.016472
cg12978573	0.31705	0.249226	0.231374	-0.0678247	-0.0856767	hypomethylation	hypomethylation	0.00132905	0.00820079	0.000139821	0.00328623
cg12990410	0.554672	0.498278	0.469986	-0.0563939	-0.0846864	hypomethylation	hypomethylation	0.0189703	0.0259275	0.00512084	0.011965
cg13037952	0.880762	0.824296	0.820187	-0.0564661	-0.0605747	hypomethylation	hypomethylation	0.0120399	0.0196328	0.00222445	0.00816903
cg13039343	0.607312	0.548724	0.538422	-0.0585878	-0.0688902	hypomethylation	hypomethylation	0.000546717	0.00638695	0.000637786	0.0051916
cg13057506	0.606322	0.553267	0.536353	-0.0530549	-0.069969	hypomethylation	hypomethylation	0.0206146	0.0272622	0.00633587	0.013255
cg13121213	0.943199	0.882434	0.884073	-0.060765	-0.059126	hypomethylation	hypomethylation	0.0014692	0.00850183	0.00227805	0.00827752
cg13130352	0.562628	0.619807	0.625759	0.057179	0.0631308	hypermethylation	hypermethylation	0.000426983	0.00613812	0.00525628	0.0121748
cg13169954	0.942823	0.880772	0.876033	-0.0620515	-0.06679	hypomethylation	hypomethylation	0.000530999	0.00638695	0.000124226	0.00318127
cg13186710	0.219873	0.168126	0.160486	-0.0517474	-0.059387	hypomethylation	hypomethylation	0.000175279	0.00425123	0.000417015	0.00452777
cg13245522	0.585355	0.501057	0.533611	-0.0842982	-0.0517441	hypomethylation	hypomethylation	0.000718807	0.00684358	0.0192384	0.0263038
cg13250654	0.693373	0.64177	0.605117	-0.0516034	-0.0882565	hypomethylation	hypomethylation	0.00562241	0.0135356	0.00159096	0.00724138
cg13260280	0.673984	0.614007	0.618097	-0.0599775	-0.0558872	hypomethylation	hypomethylation	0.000536474	0.00638695	0.00488258	0.0116808
cg13263846	0.241441	0.188463	0.158109	-0.0529782	-0.0833321	hypomethylation	hypomethylation	0.012743	0.0203508	0.00022906	0.00367744
cg13280036	0.356304	0.301752	0.296186	-0.054552	-0.060118	hypomethylation	hypomethylation	0.00940416	0.0175589	0.00338712	0.00976076
cg13311549	0.852568	0.80097	0.799891	-0.0515976	-0.0526763	hypomethylation	hypomethylation	0.0464106	0.0479893	0.0186659	0.0257345
cg13373342	0.56171	0.504388	0.507462	-0.0573219	-0.0542478	hypomethylation	hypomethylation	0.00127555	0.0081268	0.00848356	0.0156876
cg13383246	0.275157	0.224665	0.2197	-0.050492	-0.0554577	hypomethylation	hypomethylation	0.00764526	0.0156821	0.00578253	0.0126937
cg13417066	0.412568	0.328932	0.330938	-0.0836354	-0.0816297	hypomethylation	hypomethylation	0.00478257	0.01253	0.0120551	0.0193445
cg13427594	0.905918	0.843985	0.818172	-0.0619331	-0.0877464	hypomethylation	hypomethylation	0.000241608	0.00491595	2.12983e-06	0.00057795
cg13483413	0.630694	0.577031	0.551028	-0.0536627	-0.0796655	hypomethylation	hypomethylation	0.0460833	0.0476704	0.00499898	0.0117884
cg13485366	0.524165	0.468046	0.466054	-0.0561193	-0.0581111	hypomethylation	hypomethylation	0.00194717	0.00933974	0.0010808	0.00627074
cg13505245	0.62003	0.567153	0.563981	-0.0528769	-0.0560484	hypomethylation	hypomethylation	0.00332556	0.0110984	0.00414559	0.0107337
cg13511418	0.915289	0.864432	0.860226	-0.0508574	-0.0550629	hypomethylation	hypomethylation	0.00708761	0.0150807	0.008005	0.015114
cg13550855	0.566763	0.511706	0.510159	-0.0550569	-0.0566043	hypomethylation	hypomethylation	0.0057042	0.0136027	0.00449605	0.0112411
cg13552155	0.83155	0.780556	0.736288	-0.0509946	-0.0952624	hypomethylation	hypomethylation	0.014374	0.0217417	2.20769e-05	0.0017385
cg13561855	0.312652	0.259972	0.2396	-0.0526796	-0.0730515	hypomethylation	hypomethylation	0.0210065	0.0275465	0.00438765	0.0110589
cg13569051	0.676727	0.614888	0.60873	-0.0618386	-0.0679964	hypomethylation	hypomethylation	0.0369053	0.0403432	0.00571922	0.012621
cg13616132	0.260171	0.204612	0.206743	-0.055559	-0.0534278	hypomethylation	hypomethylation	0.00704312	0.0150464	0.0226082	0.0293839
cg13629798	0.812568	0.75927	0.738066	-0.0532975	-0.074502	hypomethylation	hypomethylation	0.0192253	0.0261344	0.00284359	0.00893086
cg13659778	0.757986	0.703062	0.698336	-0.054924	-0.0596494	hypomethylation	hypomethylation	0.0110602	0.0189668	0.00630117	0.0132177
cg13683361	0.282508	0.223596	0.225844	-0.0589123	-0.0566638	hypomethylation	hypomethylation	0.00435996	0.0121177	0.0168336	0.0240486
cg13700815	0.339082	0.286196	0.287054	-0.0528858	-0.0520275	hypomethylation	hypomethylation	0.000410233	0.00613812	0.0111138	0.0184835
cg13702536	0.870774	0.928738	0.934688	0.0579635	0.0639138	hypermethylation	hypermethylation	0.0120073	0.019608	0.0207264	0.0276631
cg13713663	0.392365	0.339559	0.334914	-0.0528067	-0.0574511	hypomethylation	hypomethylation	0.000830623	0.00708093	0.00156657	0.00723579
cg13732582	0.257664	0.315171	0.32123	0.0575073	0.0635669	hypermethylation	hypermethylation	0.0166184	0.0238499	0.00781595	0.0149101
cg13742426	0.748402	0.696054	0.694568	-0.0523485	-0.0538338	hypomethylation	hypomethylation	0.00593407	0.0138243	0.00716413	0.0141064
[truncated: 538 more rows]

## Sheet: common meth
	Category	GeneSet	N_genes	N_overlap	p	adjP	genes	link
[truncated: 24 more rows]
