# Supplementary material for: Blood cells of BRCA1 mutation and epimutation carries appear to acquire specific epigenetic signatures
Source: Research Square preprint supplement (doi:10.21203/rs.3.rs-7301339/v1), 2025-08-12
Supplement: Supplementary file 4 [file b272d9c04b581cdb3394a6ff.xlsx]

## Sheet: Info
Table	Description
Supplementary Table 1	All significant GSEA results for BRCA1 mutation carriers in "Halmark gene sets" database
Supplementary Table 2	All significant GSEA results for BRCA1 epimutation carriers in "Halmark gene sets" database
Supplementary Table 3	All significant GSEA results for BRCA1 mutation carriers in "Curated gene sets" database
Supplementary Table 4	All significant GSEA results for BRCA1 epimutation carriers in "Curated gene sets" database
Supplementary Table 5	Common significant GSEA results for BRCA1 mutation and epimutation carriers in "Curated gene sets" database
Supplementary Table 6	Unique significant GSEA results for BRCA1 mutation carriers in "Curated gene sets" database
Supplementary Table 7	Unique significant GSEA results for BRCA1 epimutation carriers in "Curated gene sets" database
Headers	Description
Category	One of the category from MsigDB
GeneSet	Name of gene set as provided by MsigDB
N_genes	Number of genes in a gene set
N_overlap	Number of input genes overlapping with the gene set
p	Hypergeometric test (upper tail) P-value
adjP	Adjusted P-value (Benjamini-Hochberg (FDR))
genes	Genes overlapping with the gene set

## Sheet: Supplementary Table 1
No.	Category	GeneSet	N_genes	N_overlap	p	adjP	genes
1	Hallmark_gene_sets	HALLMARK_KRAS_SIGNALING_DN	184	26	4.27049e-05	0.00213524	EDN2:RYR2:ABCB11:PDE6B:ADRA2C:SYNPO:TENM2:PROP1:SGK1:PARK2:SLC29A3:CPEB3:CALCB:PTPRJ:NTF3:GPR19:ACTC1:ALOX12B:MYO15A:DCC:FGF22:ATP4A:RYR1:ZNF112:KLK8:KCNQ2

## Sheet: Supplementary Table 2
No.	Category	GeneSet	N_genes	N_overlap	p	adjP	genes
1	Hallmark_gene_sets	HALLMARK_UV_RESPONSE_DN	138	38	1.45127e-06	7.25635e-05	PEX14:PRDM2:PTGFR:AKT3:LTBP1:COL5A2:IGFBP5:PPARG:KALRN:SCHIP1:APBB2:PDLIM5:MAP1B:ATXN1:CAP2:MAPK14:FYN:SYNJ2:AMPH:CDK13:MAGI2:INSIG1:DLC1:RBPMS:RXRA:CELF2:NRP1:KCNMA1:MGMT:SLC22A18:SIPA1L1:ANXA2:SMAD3:ADORA2B:ERBB2:ITGB3:SPOP:PRKCA
2	Hallmark_gene_sets	HALLMARK_APICAL_JUNCTION	186	41	0.0001782	0.00445501	LDLRAP1:THBS3:NFASC:AKT3:ITGA9:CD86:PPP2R2C:FYB:VCAN:RASA1:MAPK14:COL9A1:EPB41L2:FSCN1:SKAP2:CLDN15:EXOC4:KCNH2:INSIG1:PTK2:VCL:TSPAN4:PARVA:CTNND1:NRXN2:LIMA1:CX3CL1:CDH8:CDH15:NLGN2:GRB7:WNK4:ITGB4:DSC3:PARD6G:ICAM1:ICAM4:ICAM5:MYL9:CDH4:MAPK11
3	Hallmark_gene_sets	HALLMARK_EPITHELIAL_MESENCHYMAL_TRANSITION	189	39	0.000994024	0.0165671	PRRX1:COL5A2:COL6A3:FBLN2:WNT5A:MYLK:ITGB5:PLOD2:IL15:VCAN:EDIL3:FBN2:SGCD:SLIT3:CAP2:DST:TFPI2:CXCL12:ADAM12:CD59:CADM1:TAGLN:NTM:MGP:LRP1:LUM:DCN:SGCG:COL4A1:COL4A2:NID2:GREM1:PPIB:LOXL1:ITGB3:CDH2:TPM4:MYL9:PMEPA1
4	Hallmark_gene_sets	HALLMARK_MYOGENESIS	192	39	0.0013536	0.01692	GJA5:TNNI1:FKBP1B:CHRNA1:CHRNG:COL6A3:MYLK:ITGB5:WWTR1:SCHIP1:IGFBP7:SGCD:PDLIM7:KCNH2:MYOM2:CLU:PTP4A3:GSN:NOTCH1:SORBS1:ADAM12:LSP1:NAV2:APLNR:PC:TAGLN:NOS1:SGCG:COL4A2:MYH7:DAPK2:GNAO1:CDH13:MYH2:ITGB4:DTNA:HRC:APP:LARGE

## Sheet: Supplementary Table 3
No.	Category	GeneSet	N_genes	N_overlap	p	adjP	genes
1	Curated_gene_sets	BENPORATH_ES_WITH_H3K27ME3	1007	125	4.23931e-15	2.75343e-11	TNFRSF1B:IGSF21:EPHA10:NT5C1A:FOXD2:LHX8:BRINP2:CACNA1E:SUSD4:TRIM67:SLC35F3:KCNS3:NRXN1:TGFA:CYP26B1:PAX8:CNTNAP5:RAPGEF4:HOXD13:HOXD4:CDK5R2:SGPP2:SLCO2A1:KCNAB1:MECOM:ZFYVE28:KCNIP4:PHOX2B:GABRA4:PITX2:GRIA2:SPOCK3:CDH6:EGFLAM:MAST4:SLIT3:RASGEF1C:HLA-B:LRFN2:RUNX2:KCNQ5:RIPPLY2:EYA4:TCF21:RPS6KA2:SMOC2:HOXA4:TBX20:GRB10:ACTL6B:SLC26A5:LHFPL3:PRKAG2:DPP6:PTPRN2:CSMD1:LPL:NRG1:HEY1:PAX5:PGM5:PR…
2	Curated_gene_sets	REACTOME_NEURONAL_SYSTEM	373	57	7.2897e-11	2.36733e-07	SLC1A7:KCNN3:CACNA1E:SYT2:KCNS3:ADCY3:NRXN1:LRRTM4:CACNA2D3:ADCY5:KCNAB1:KCNMB2:KCNMB3:GNB4:GABRA4:GRIA2:RASGRF2:CAMK4:GLRA1:GABRA6:LRFN2:KCNQ5:GRIK2:RPS6KA2:PRKAG2:DLGAP2:NRG1:KCNB2:PTPRD:GABBR2:STXBP1:GAD2:KCNMA1:KCNQ1:PPFIBP2:ABCC8:SYT12:SLC38A2:LIN7A:ADCY4:KCNH5:SIPA1L1:NRXN3:GABRB3:GABRA5:GABRG3:NPTN:RASGRF1:NLGN2:GJC1:PPM1E:PRKCA:DLGAP1:LRFN3:GRIN2D:PLCB1:KCNQ2
3	Curated_gene_sets	BENPORATH_SUZ12_TARGETS	898	102	3.16959e-10	6.86216e-07	TNFRSF1B:IGSF21:EPHA10:NT5C1A:CYP4X1:FOXD2:LHX8:BRINP2:CACNA1E:SUSD4:TRIM67:SLC35F3:CYP26B1:PAX8:RAPGEF4:HOXD13:HOXD4:CDK5R2:SGPP2:SLCO2A1:KCNAB1:MECOM:ZFYVE28:KCNIP4:TBC1D1:PHOX2B:GABRA4:PITX2:GRIA2:SPOCK3:CDH6:EGFLAM:RASGRF2:DPP6:VIPR2:CSMD1:LPL:NRG1:HEY1:PAX5:PGM5:GABBR2:LPPR1:KLF4:ASTN2:GAD2:PARD3:KCNMA1:GRID1:TLL2:CRTAC1:GFRA1:IGF2:ABCC8:ABTB2:NPAS4:SYT12:GPR83:ARHGAP20:LAYN:DSCAML1:PKNOX2:E…
4	Curated_gene_sets	BENPORATH_EED_TARGETS	935	104	6.85142e-10	1.1125e-06	IGSF21:ARID1A:NT5C1A:FOXD2:LHX8:BRINP2:CACNA1E:SUSD4:TRIM67:SLC35F3:TGFA:CYP26B1:PAX8:HOXD13:HOXD4:CDK5R2:SGPP2:SLCO2A1:KCNAB1:ZFYVE28:SORCS2:PHOX2B:GABRA4:PITX2:GRIA2:SPOCK3:HIST1H3A:HIST1H3B:HIST1H3C:HIST1H3D:HIST1H3E:HIST1H3F:HIST1H3G:HIST1H3H:HIST1H3I:HIST1H3J:HLA-G:HLA-B:LRFN2:RUNX2:KCNQ5:MCHR2:EYA4:TCF21:AHR:DFNA5:HOXA4:TBX20:MAGI2:RELN:LHFPL3:VIPR2:CSMD1:LPL:NRG1:HEY1:MTSS1:PGM5:LPPR1:KLF4…
5	Curated_gene_sets	MIKKELSEN_MEF_HCP_WITH_H3_UNMETHYLATED	184	35	1.06869e-09	1.38259e-06	OLFM3:SYCP1:NXPH2:SLC25A31:PCDHA1:PCDHA2:PCDHA3:PCDHA4:PCDHA5:PCDHA6:PCDHA7:PCDHA9:PCDHA10:PCDHA11:PCDHA12:PCDHA13:PCDHAC1:PCDHB7:GLRA1:CLVS2:BHLHA15:CNTNAP2:DPP6:LY6K:GSN:NPAS4:PIWIL1:LTB4R:RBFOX1:DPEP3:NLGN2:CHAD:DLGAP1:ZNF516:FGF22:KLK10:WBP2NL
6	Curated_gene_sets	MIKKELSEN_MEF_HCP_WITH_H3K27ME3	566	72	1.27722e-09	1.38259e-06	IGSF21:EPHA8:NHLH2:CACNA1E:IRF6:SLC35F3:RYR2:ALK:PAX8:DPP10:RAPGEF4:HOXD4:MARCH4:CDK5R2:ADRA2C:PPP2R2C:SLC34A2:PHOX2B:PRDM8:GRIA2:CPLX2:PFN3:RASGEF1C:TNXB:TCF21:TBX20:ACTL6B:SLC26A5:RELN:TMEM229A:PTPRN2:DLGAP2:CSMD1:FGF17:CALB1:BAI1:KCNT1:GRID1:CRTAC1:CPXM2:BRSK2:KCNQ1:RBMXL2:ABCC8:DSCAML1:NTM:SRRM4:PTGDR:KCNH5:GABRA5:GABRG3:OTUD7A:DOC2A:CDH8:MARVELD3:DOC2B:ALOX12B:SLC47A1:IKZF3:CRHR1:CA10:DCC:CB…
7	Curated_gene_sets	BENPORATH_PRC2_TARGETS	588	70	3.38044e-08	3.13656e-05	IGSF21:NT5C1A:FOXD2:LHX8:BRINP2:CACNA1E:SUSD4:TRIM67:SLC35F3:CYP26B1:PAX8:HOXD13:HOXD4:CDK5R2:SGPP2:SLCO2A1:KCNAB1:ZFYVE28:PHOX2B:GABRA4:PITX2:GRIA2:SPOCK3:CSMD1:LPL:NRG1:HEY1:PGM5:LPPR1:KLF4:ASTN2:GAD2:KCNMA1:GRID1:CRTAC1:ABCC8:ABTB2:NPAS4:SYT12:ARHGAP20:LAYN:DSCAML1:PKNOX2:HOXC11:HOXC8:HOXC4:HOXC4:TBX5:GPC5:ADCY4:PTGDR:OCA2:SEMA6D:RASGRF1:ST8SIA2:SCNN1G:MT1A:NTN1:HNF1B:IKZF3:CRHR1:HOXB6:B4GALNT…
8	Curated_gene_sets	MEISSNER_BRAIN_HCP_WITH_H3K4ME3_AND_H3K27ME3	1030	103	2.07898e-07	0.000154653	IGSF21:ALPL:RNF220:STIL:BCAR3:SYT2:PTPN14:KIF26B:TRIM58:KCNS3:DYSF:DPP10:SNED1:ITGA9:ITGB5:SLCO2A1:MECOM:IGF2BP2:ADRA2C:SORCS2:PRDM8:SLC12A7:EGFLAM:RASGRF2:N4BP3:ADAMTS2:CD83:ABT1:B3GAT2:C6ORF165:C6orf165:EYA4:SMOC2:ELFN1:RELN:PLXNA4:DPP6:VIPR2:MTUS1:LPL:EBF2:RBPMS:SPIDR:FZD6:GLDC:PGM5:KLF4:ASS1:ENTPD2:CCDC3:KIAA1217:GAD2:TSPAN15:TLL2:CRTAC1:GFRA1:FGFR2:SWAP70:BDNF:ABTB2:GPR83:NTF3:PTPRO:LIN7A:TE…
9	Curated_gene_sets	MIKKELSEN_ES_HCP_WITH_H3K27ME3	39	13	2.35137e-07	0.000154653	CACNA1E:HOXD4:PHOX2B:PRDM8:PCDHA2:PCDHA3:PCDHA12:PCDHB7:PCDHB15:NTM:TBX5:ALOX12B:DCC:NETO1
10	Curated_gene_sets	MIKKELSEN_IPS_WITH_HCP_H3K27ME3	97	21	2.38112e-07	0.000154653	CACNA1E:HOXD4:PHOX2B:PRDM8:SLC25A31:PCDHA2:PCDHA3:PCDHA4:PCDHA10:PCDHA11:PCDHA13:PCDHB7:ACTL6B:CALB1:IGF2:NPAS4:NTM:HOXC8:TBX5:ASIC2:HOXB6:CACNA1G:CA10
11	Curated_gene_sets	ACEVEDO_METHYLATED_IN_LIVER_CANCER_DN	698	76	3.52332e-07	0.000208036	AJAP1:TNFRSF8:EPHA8:LUZP1:EPHA10:MSTO1:OR10K1:RGS13:KIF26B:OR2L13:MYT1L:SLC8A1:KIF5C:HOXD13:NUP35:OR6B3:CLASP2:KCNMB2:MUC4:PPP2R2C:CLNK:ANK2:NPY2R:ASB5:SLC6A19:SLC6A18:EGFLAM:PCDHA11:PCDHA13:PCDHGA2:HMGXB3:TENM2:SH3PXD2B:CPLX2:N4BP3:RASGEF1C:DPCR1:GRIK2:TIAM2:PARK2:SDK1:HOXA4:PLXNA4:DPP6:PTPRN2:VIPR2:DLGAP2:SLC20A2:SLC45A4:ASTN2:ZNF438:CCDC7:C10ORF68:GDF10:TET1:GRID1:CRTAC1:PDZD8:CPXM2:PTPRE:ABCC…
12	Curated_gene_sets	GRYDER_PAX3FOXO1_ENHANCERS_IN_TADS	942	93	1.45077e-06	0.00078523	RERE:ARID1A:SDC3:RRAGC:BCAR3:DNTTIP2:KCNN3:ATF6:ENAH:GALNT2:KCNS3:KLHL29:ALK:CDC42EP3:ST6GAL2:CUL3:DOCK10:AGAP1:SUMF1:MAGI1:IGF2BP2:TBC1D1:PITX2:ANK2:KIAA0922:SPOCK3:RGMB:SPDL1:RANBP17:N4BP3:FARS2:ATXN1:RPF2:EYA4:SNX9:QKI:SDK1:WIPI2:GRB10:COBL:TPST1:POR:KIAA1324L:CDK6:DNAJB6:VIPR2:NRG1:PTPRD:PRUNE2:DAPK1:ASTN2:ASS1:CELF2:CCDC3:KIAA1217:KIF5B:PARD3:SGMS1:KCNMA1:NOC3L:FAM160B1:FGFR2:IGF2:EXT2:PKNOX…
13	Curated_gene_sets	ACEVEDO_LIVER_CANCER_WITH_H3K27ME3_DN	148	25	2.51662e-06	0.00125734	RAPGEF4:PP2D1:PCDHGB3:PCDHGA6:PCDHGA7:PCDHGB4:PCDHGA8:PCDHGA9:PCDHGB6:PCDHGA10:PCDHGB7:PCDHGA11:CPLX2:GRIK2:USH1C:OR5D14:OR5L2:TMEM132C:OR4K2:COCH:TTC9:RBFOX1:PPP1R16B:COL18A1:APOL2
14	Curated_gene_sets	MEISSNER_NPC_HCP_WITH_H3K4ME2_AND_H3K27ME3	333	42	4.48302e-06	0.0020798	IGSF21:LHX8:SYT2:RYR2:KCNS3:ALK:ST6GAL2:DPP10:HOXD13:CDK5R2:SGPP2:ADRA2C:PPP2R2C:EGFLAM:ADAMTS2:RASGEF1C:SMOC2:AHR:COBL:ACTL6B:PTPRN2:DLGAP2:BAI1:GABBR2:CRTAC1:IGF2:TMEM151A:SYT12:DSCAML1:TESC:GABRA5:GABRG3:RASGRF1:CDH8:VAT1L:IKZF3:CRHR1:PTPRT:GNAS:KCNQ2:SOX18:TBX1
15	Curated_gene_sets	MIKKELSEN_MCV6_HCP_WITH_H3K27ME3	415	49	4.88294e-06	0.00211432	IGSF21:EPHA8:NHLH2:SYT2:SLC35F3:TRIM58:DYSF:DPP10:NXPH2:HOXD4:CCK:CACNA2D3:GNB4:ADRA2C:SLC34A2:GABRA4:GRIA2:PCDHAC2:ADAMTS2:RASGEF1C:GRB10:RELN:LHFPL3:DLGAP2:BAI1:GLDC:GABBR2:KCNT1:KCNMA1:GRID1:BRSK2:KCNQ1:ABCC8:NELL2:TBX5:NPAS3:GABRA5:DOC2B:ALOX12B:ASIC2:CRHR1:CHAD:CACNA1G:DLL3:PTPRT:KCNK15:NTSR1:KCNQ2:B3GALT5
16	Curated_gene_sets	REACTOME_PROTEIN_PROTEIN_INTERACTIONS_AT_SYNAPSES	76	16	9.30678e-06	0.00377797	SYT2:NRXN1:LRRTM4:LRFN2:DLGAP2:PTPRD:STXBP1:PPFIBP2:SYT12:LIN7A:SIPA1L1:NRXN3:NLGN2:DLGAP1:LRFN3:GRIN2D
17	Curated_gene_sets	MANALO_HYPOXIA_UP	187	27	2.07457e-05	0.00765087	GJA5:PPARG:BCL6:SORBS2:MAST4:SYNPO:N4BP3:ATXN1:HLA-B:HIVEP2:RPS6KA2:ZHX2:MTSS1:CELF2:GDF10:CHST1:PTPRR:DUSP6:COL4A1:COL4A2:SMAD6:CDH2:KANK3:CYP4F11:PPP1R13L:HIF3A:COL18A1
18	Curated_gene_sets	LIM_MAMMARY_STEM_CELL_UP	439	49	2.23243e-05	0.00765087	PDPN:LUZP1:LGR6:KLHL29:OSBPL6:DOCK10:HDAC4:RARB:ITGA9:GNB4:PCDH7:SLIT3:COL23A1:ADAMTS2:QKI:IL6:TPST1:RELN:LEP:CALD1:RBPMS:NRG1:MTSS1:GSN:CCDC3:KCNMA1:PTPRE:ARHGAP20:PKNOX2:NTF3:YAF2:LIMA1:LRP1:DUSP6:ELK3:EID3:COL4A1:COL4A2:SNTB2:CDH13:NXN:NLGN2:GJC1:RNF165:LPHN1:PPP1R16B:PTPRT:CDH4:COL18A1
19	Curated_gene_sets	GRESHOCK_CANCER_COPY_NUMBER_UP	309	38	2.23813e-05	0.00765087	RPL22:LCK:STIL:EPS15:ABL2:ALK:MSH2:PAX8:HOXD13:PPARG:XPC:MECOM:BCL6:PHOX2B:RANBP17:ROS1:CDK6:FANCG:PAX5:TET1:SUFU:FGFR2:LMO2:EXT2:MEN1:ARHGEF12:HOXC11:ERCC5:RAD51B:FANCA:SPECC1:RARA:BRCA1:HLF:CLTC:ZNF331:GNAS:CLTCL1
20	Curated_gene_sets	REACTOME_NEUREXINS_AND_NEUROLIGINS	50	12	3.04304e-05	0.00988228	SYT2:NRXN1:LRRTM4:DLGAP2:STXBP1:SYT12:LIN7A:SIPA1L1:NRXN3:NLGN2:DLGAP1:GRIN2D
21	Curated_gene_sets	RODRIGUES_THYROID_CARCINOMA_DN	67	14	3.63885e-05	0.0112544	CDC42EP3:PAX8:MAP2:ANKRD28:ROBO1:BBX:IGF2BP2:ATXN1:HIVEP2:AIG1:CDK6:KCNMA1:PPP1R13L:PLCB1
22	Curated_gene_sets	DAVICIONI_MOLECULAR_ARMS_VS_ERMS_UP	308	37	4.74323e-05	0.0140033	KCNN3:ALK:CDC42EP3:PKP4:RAPGEF4:CUL3:CLASP2:ADRA2C:ANK2:KIAA0922:NNT:COBL:POR:MAGI2:VIPR2:DLGAP2:KDM4C:PTPRD:GNE:PAX5:DAPK1:LPPR1:ASTN2:ASS1:SGMS1:ADK:FGFR2:MED13L:DOCK9:ARPP19:WWOX:FAM64A:TTC19:MEOX1:TEX2:PIGN:COL18A1
23	Curated_gene_sets	REACTOME_TRANSMISSION_ACROSS_CHEMICAL_SYNAPSES	241	31	5.29787e-05	0.0149607	SLC1A7:CACNA1E:ADCY3:CACNA2D3:ADCY5:GNB4:GABRA4:GRIA2:RASGRF2:CAMK4:GLRA1:GABRA6:GRIK2:RPS6KA2:PRKAG2:NRG1:GABBR2:STXBP1:GAD2:SLC38A2:LIN7A:ADCY4:GABRB3:GABRA5:GABRG3:NPTN:RASGRF1:PPM1E:PRKCA:GRIN2D:PLCB1
24	Curated_gene_sets	MEISSNER_NPC_HCP_WITH_H3K4ME2	456	49	5.92704e-05	0.0160401	ALPL:AGBL4:LGR6:SLC35F3:ADCY3:DYSF:MARCH4:PRDM8:PRKG2:SLC12A7:TERT:FBXL21:PCDHAC1:SLIT3:CPLX2:N4BP3:COL23A1:GRIK2:AIG1:DPP6:VIPR2:MFHAS1:EBF2:FZD6:SEMA4D:CCDC3:KIAA1217:GAD2:GDF10:TLL2:CPXM2:PTPRE:BRSK2:SRRM4:DLK1:OTUD7A:RBFOX1:DOC2A:ABR:ITGB3:CACNA1G:EMILIN2:MYO5B:MBP:PPAP2C:DLL3:GRIN2D:UCKL1:COL18A1
25	Curated_gene_sets	DAWSON_METHYLATED_IN_LYMPHOMA_TCL1	55	12	8.32337e-05	0.0216241	AJAP1:KLHL29:PKP4:STK39:HOXD13:OSBPL6:CLVS2:SOGA3:SOGA3:KIAA0408:TMEM229A:PTPRD:MDGA2:MDGA2:MACROD2
26	Curated_gene_sets	KEGG_NEUROACTIVE_LIGAND_RECEPTOR_INTERACTION	248	31	9.10572e-05	0.0227468	ADRA2C:GABRA4:NPY2R:GRIA2:GLRA1:GABRA6:MCHR2:GRIK2:NMBR:OPRM1:LEP:CHRM2:VIPR2:GABBR2:PARD3:GRID1:APLNR:CHRM1:GPR83:LTB4R2:LTB4R2:LTB4R:PTGDR:BDKRB2:GABRB3:GABRA5:GABRG3:CRHR1:MC2R:S1PR2:GRIN2D:NTSR1
27	Curated_gene_sets	REACTOME_NEUROTRANSMITTER_RECEPTORS_AND_POSTSYNAPTIC_SIGNAL_TRANSMISSION	182	25	9.48935e-05	0.0228272	ADCY3:ADCY5:GNB4:GABRA4:GRIA2:RASGRF2:CAMK4:GLRA1:GABRA6:GRIK2:RPS6KA2:PRKAG2:NRG1:GABBR2:LIN7A:ADCY4:GABRB3:GABRA5:GABRG3:NPTN:RASGRF1:PPM1E:PRKCA:GRIN2D:PLCB1
28	Curated_gene_sets	REACTOME_REGULATION_OF_COMMISSURAL_AXON_PATHFINDING_BY_SLIT_AND_ROBO	10	5	0.000152283	0.0353242	ROBO1:SLIT3:NELL2:NTN1:DCC
29	Curated_gene_sets	MIKKELSEN_NPC_HCP_WITH_H3K27ME3	327	37	0.00016501	0.0369564	TNFRSF1B:IGSF21:EPHA8:LHX8:SYT2:RYR2:KCNS3:ALK:DPP10:NXPH2:PTPRN:SGPP2:ADRA2C:PPP2R2C:RASGEF1C:COBL:DLGAP2:BAI1:CRTAC1:IGF2:KCNQ1:TMEM151A:SYT12:DSCAML1:HOXC8:GABRA5:GABRG3:SCNN1G:CDH8:VAT1L:IKZF3:CRHR1:B4GALNT2:CA10:PTPRT:KCNQ2:SOX18

## Sheet: Supplementary Table 4
No.	Category	GeneSet	N_genes	N_overlap	p	adjP	genes
1	Curated_gene_sets	DACOSTA_UV_RESPONSE_VIA_ERCC3_DN	816	175	1.54326e-13	1.00234e-09	PEX14:ID3:STIL:ZFYVE9:ROR1:ZZZ3:DPYD:KIFAP3:RABGAP1L:RGL1:RGS7:ROCK2:PUM2:NCOA1:WDR43:LRPPRC:MSH2:MSH6:PSME4:EHBP1:R3HDM1:ZEB2:KIF5C:PKP4:BAZ2B:STK39:TLK1:SLC25A12:COL5A2:SATB2:KLF7:TRIP12:AGAP1:LRRFIP1:HDAC4:ANKRD28:UBE2E1:TRAK1:WNT5A:MITF:FILIP1L:BBX:ZBTB20:ZNF148:PLOD2:WWTR1:MBNL1:SCHIP1:FAM193A:AFAP1:APBB2:POLR2B:FGF5:WDFY3:PDLIM5:TSPAN5:ABCE1:SEMA5A:MAP1B:MSH3:RASA1:FAM172A:TTC37:MAN2A1:NREP…
2	Curated_gene_sets	BENPORATH_ES_WITH_H3K27ME3	1007	202	1.70587e-12	5.53982e-09	TP73:TNFRSF1B:IGSF21:PAX7:CSMD2:GRIK3:RSPO1:COL9A2:FOXD2:PTGER3:LHX8:PTGFR:BCAN:ASTN1:FAM163A:CR2:WNT3A:TRIM67:SLC35F3:KCNS3:DTNB:NRXN1:TGFA:VAX2:ATOH8:CD8A:MAL:FBLN7:CNTNAP5:ZEB2:KCNH7:RAPGEF4:HOXD13:TMEFF2:SATB2:ERBB4:SGPP2:RAMP1:GPD1L:CD47:SLCO2A1:CLSTN2:DGKG:GABRA4:CWH43:EPHA5:FGF5:SCD5:LEF1:DCLK2:LRBA:DCHS2:SPOCK3:SLC9A3:CTNND2:EGFLAM:FBN2:CXCL14:NRG2:CDX1:EBF1:SLIT3:RASGEF1C:HLA-B:ETV7:LRFN…
3	Curated_gene_sets	MEISSNER_BRAIN_HCP_WITH_H3K4ME3_AND_H3K27ME3	1030	203	8.21407e-12	1.7181e-08	PRKCZ:PRDM16:IGSF21:ID3:LDLRAP1:MAP3K6:GRIK3:RSPO1:RNF220:STIL:GLIS1:ROR1:PTGER3:SLC44A5:RHBG:BCAN:FAM163A:SYT2:SOX13:PTPN14:DISC1:PLD5:TRIM58:FAM110C:SNTG2:RRM2:KCNS3:ATOH8:MAL:FBLN7:DPP10:C1QL2:SATB2:FZD5:IGFBP5:SNED1:HRH1:FBLN2:CMTM7:ITGA9:WNT5A:PHLDB2:ITGB5:TMEM108:SLCO2A1:ESYT3:PLOD2:WWTR1:IGF2BP2:ADRA2C:SORCS2:PROM1:CORIN:CWH43:IGFBP7:ANTXR2:PRDM8:FGF5:PDLIM5:LEF1:SLC9A3:ANKRD33B:EGFLAM:RAS…
4	Curated_gene_sets	GOBERT_OLIGODENDROCYTE_DIFFERENTIATION_DN	988	196	1.0581e-11	1.7181e-08	ICMT:SPSB1:EFCAB7:PDE4B:WLS:MLLT11:RUSC1:RABGAP1L:TNR:ASTN1:NAV1:SOX13:NFASC:TMCC2:AKT3:LTBP1:QPCT:RTN4:EHBP1:TCF7L1:LIMS2:WDR33:SFT2D3:ZEB2:PKP4:BAZ2B:TMEFF2:PLEKHM3:TNS1:WDFY1:COL6A3:MYEOV2:SNED1:RAD18:ANKRD28:NISCH:FOXP1:PHLDB2:ZBTB20:LSAMP:IGSF11:MYLK:KALRN:TMEM108:AMOTL2:XRN1:GNB4:SOX2-OT:FAM193A:TBC1D14:AFAP1:HS3ST1:PCDH7:IGFBP7:ANTXR2:LIN54:CASP6:ZFR:ELOVL7:MAP1B:NREP:PCDHB4:PPP2R2B:SYNPO:…
5	Curated_gene_sets	BENPORATH_SUZ12_TARGETS	898	179	5.87862e-11	7.63633e-08	TP73:TNFRSF1B:IGSF21:PAX7:GRIK3:RSPO1:YRDC:COL9A2:FOXD2:WLS:PTGER3:LHX8:PTGFR:GFI1:FAM46C:ASTN1:FAM163A:WNT3A:TRIM67:SLC35F3:VAX2:ATOH8:CD8A:MAL:FBLN7:ZEB2:RAPGEF4:HOXD13:TMEFF2:ERBB4:IGFBP5:SGPP2:SLCO2A1:ESYT3:CLSTN2:DGKG:TBC1D1:GABRA4:CWH43:EPHA5:FGF5:SCD5:LEF1:DCLK2:DCHS2:SPOCK3:SLC9A3:CTNND2:EGFLAM:CRHBP:RASGRF2:FBN2:CXCL14:NRG2:CAV2:DGKI:DPP6:VIPR2:CSMD1:GATA4:DLC1:NEFM:HTRA4:SDR16C5:SLCO5A1…
6	Curated_gene_sets	MIKKELSEN_MEF_HCP_WITH_H3K27ME3	566	124	1.46603e-10	1.58698e-07	PRKCZ:PTCHD2:IGSF21:PAX7:EPHA8:GRIK3:RSPO1:GFI1:NHLH2:BCAN:ASTN1:FAM163A:IRF6:WNT3A:SLC35F3:ALK:MAL:DPP10:C1QL2:KCNH7:RAPGEF4:MARCH4:LHFPL4:HRH1:FGF12:ADRA2C:PPP2R2C:CWH43:PRDM8:SLC9A3:PRLR:TMEM174:CRHBP:FSTL4:HTR4:CDX1:KCNIP1:PFN3:RASGEF1C:TNXB:TFAP2D:TCF21:GRM1:NXPH1:TBX20:VSTM2A:SLC26A5:RELN:TMEM229A:PTPRN2:DLGAP2:CSMD1:GRHL2:DPYS:FBP1:KCNT1:LHX3:SPAG6:CHAT:SLIT1:SORCS3:CPXM2:TCERG1L:BRSK2:NEL…
7	Curated_gene_sets	LIU_OVARIAN_CANCER_TUMORS_AND_XENOGRAFTS_XDGS_DN	1430	254	1.24465e-09	1.15486e-06	VWA1:SLC2A5:TNFRSF8:TNFRSF1B:CLIC4:FGR:LCK:CSMD2:GRIK3:PDE4B:PTGER3:AK5:GBP2:DPYD:SELP:PRRX1:ASTN1:RGL1:PTGS2:KCNT2:CHI3L1:NFASC:GNG4:NID1:AKT3:KCNS3:NLRC4:QPCT:ANTXR1:TGFA:CD8A:SH3RF3:ZEB2:GALNT5:SCN9A:DHRS9:CHRNA1:HOXD10:OSBPL6:FAM171B:COL5A2:HECW2:SATB2:NRP2:COL6A3:RAMP1:FGD5:GALNT15:RBMS3:WNT5A:CADPS:PRICKLE2:CNTN3:ROBO2:VGLL3:FILIP1L:PHLDB2:CD86:SLCO2A1:PLOD2:GNB4:PPP2R2C:HS3ST1:LDB2:RHOH:CO…
8	Curated_gene_sets	MEISSNER_NPC_HCP_WITH_H3K4ME2_AND_H3K27ME3	333	81	1.65343e-09	1.34238e-06	PRDM16:TP73:IGSF21:GRIK3:RSPO1:PTGER3:LHX8:PTGFRN:SYT2:WNT3A:PGBD5:GNG4:PLD5:KCNS3:ALK:MAL:ST6GAL2:DPP10:C1QL2:GALNT13:HOXD13:SGPP2:CADPS:CLSTN2:ADRA2C:PPP2R2C:GABRB1:FAM47E-STBD1:CLGN:EGFLAM:ANKRD34B:CXCL14:RASGEF1C:SMOC2:AHR:COBL:BAIAP2L1:PTPRN2:DLGAP2:UNC5D:SNTG1:GABBR2:PAPPA:CHAT:COL13A1:PAX2:SORCS3:VWA2:IGF2:SYT12:DSCAML1:OAF:WSCD2:HRK:TESC:GABRA5:GABRG3:CDH8:CA7:SPIRE2:RAB11FIP4:IKZF3:CRHR1…
9	Curated_gene_sets	LIU_PROSTATE_CANCER_DN	438	99	1.91111e-09	1.37918e-06	PEX14:CLIC4:GLIS1:CACHD1:GBP2:PRRX1:ENAH:LYST:NID1:GRHL1:LTBP1:PLEKHH2:SLC25A12:HOXD13:HOXD10:TNS1:SGPP2:FGD5:GPD1L:ITGA9:ZBTB47:ACOX2:PRICKLE2:LSAMP:MYLK:RBP1:MUC4:MFI2:PCDH7:TBC1D1:ANK2:STOX2:SORBS2:UBE2QL1:SNORD123:NNT:PIK3R1:MAP1B:GALNT10:NEURL1B:DST:COL9A1:FYN:LAMA4:ECHDC1:EYA4:SEMA3E:LAMB1:CAV2:CTSB:CLU:RBPMS:PLEKHA2:STOM:PTGDS:ITIH5:OPTN:ITGA8:COL13A1:PLAU:VCL:KCNMA1:SORBS1:SH3PXD2A:FGFR2:…
10	Curated_gene_sets	REACTOME_PROTEIN_PROTEIN_INTERACTIONS_AT_SYNAPSES	76	30	2.44687e-09	1.58924e-06	SYT2:NRXN1:LRRTM4:PDLIM5:LRFN2:EPB41L2:GRM1:STX1A:DLGAP2:PTPRD:STXBP1:GRIN1:SYT7:NRXN2:SYT12:SHANK2:DLG2:PPFIBP1:SYT1:PPFIA2:SIPA1L1:NRXN3:BEGAIN:NTRK3:NLGN2:DLGAP1:PTPRS:PPFIA3:SHANK1:DLGAP4
11	Curated_gene_sets	REACTOME_NEUREXINS_AND_NEUROLIGINS	50	23	5.32043e-09	3.14147e-06	SYT2:NRXN1:LRRTM4:PDLIM5:EPB41L2:GRM1:STX1A:DLGAP2:STXBP1:GRIN1:SYT7:NRXN2:SYT12:SHANK2:DLG2:SYT1:SIPA1L1:NRXN3:BEGAIN:NLGN2:DLGAP1:SHANK1:DLGAP4
12	Curated_gene_sets	SCHAEFFER_PROSTATE_DEVELOPMENT_48HR_DN	372	85	1.56141e-08	8.11144e-06	RSPO1:CACHD1:PTGER3:SLC19A2:KIFAP3:PRRX1:QPCT:ANTXR1:DPP10:PKP4:FAM171B:ABI2:NRP2:KLF7:HDAC4:RBMS3:CACNA2D3:FOXP1:ROBO2:FILIP1L:PEX5L:LDB2:GABRA4:GABRB1:EPHA5:SPARCL1:PCDH10:EDIL3:PDLIM7:GFOD1:CD83:FAM8A1:HLA-G:LRFN2:PTCHD4:REV3L:HIVEP2:TIAM2:AHR:AMPH:CTTNBP2:CTSB:SULF1:RUNX1T1:STK3:RSPO2:KCNK9:NAPRT1:PAPPA:RALGDS:FAM107B:SUFU:CPXM2:LHPP:EBF3:TCERG1L:GPR123:FIBIN:TSPAN18:MRGPRF:ARHGAP42:UBASH3B:E…
13	Curated_gene_sets	REACTOME_NEURONAL_SYSTEM	373	85	1.77937e-08	8.11144e-06	GRIK3:KCNN3:SYT2:GNG4:KCNS3:ADCY3:NRXN1:LRRTM4:KCNH7:CHRNA1:ERBB4:PRKAG3:CHRND:CHRNG:CACNA2D3:KCNMB2:KCNMB3:GNB4:GABRA4:GABRB1:PDLIM5:ADCY2:RASGRF2:GABRA6:GABBR1:LRFN2:KCNQ5:MYO6:EPB41L2:GRM1:RPS6KA2:PRKAR1B:STX1A:KCNH2:DLGAP2:CHRNA2:KCNK9:PTPRD:GABBR2:STXBP1:GRIN1:CACNA1B:CHAT:KCNMA1:SYT7:NRXN2:SYT12:SHANK2:DLG2:SLC6A12:KCNJ8:PPFIBP1:TUBA1B:KCNH3:SYT1:PPFIA2:ADCY4:SIPA1L1:NRXN3:BEGAIN:GABRB3:GAB…
14	Curated_gene_sets	MIKKELSEN_MCV6_HCP_WITH_H3K27ME3	415	92	1.92755e-08	8.11144e-06	TP73:PTCHD2:IGSF21:EPHA8:RSPO1:COL9A2:AK5:NHLH2:BCAN:FAM163A:SYT2:WNT3A:SLC35F3:TRIM58:SH3RF3:DPP10:C1QL2:RAMP1:KLHL40:CACNA2D3:CLSTN2:GNB4:FGF12:ADRA2C:GABRA4:FGF5:CLGN:SLC9A3:FSTL4:CXCL14:PCDHAC2:RASGEF1C:GRM1:RELN:KCNH2:DLGAP2:GATA4:NEIL2:ANK1:GLDC:GABBR2:LMX1B:KCNT1:LHX3:CHAT:COL13A1:KCNMA1:SLIT1:PAX2:TCERG1L:BRSK2:SPON1:NELL1:NRXN2:ZBTB16:OAF:NELL2:TRHDE:WSCD2:TBX5:ATP8A2:NPAS3:GABRA5:PDE8A:…
15	Curated_gene_sets	LIM_MAMMARY_STEM_CELL_UP	439	96	1.94658e-08	8.11144e-06	LUZP1:COL9A2:PRRX1:PTGS2:LGR6:AKT3:ANTXR1:TCF7L1:FBLN7:LIMS2:OSBPL6:COL5A2:NRP2:TNS1:HDAC4:ITGA9:PCBP4:PRICKLE2:FOXP1:VGLL3:MYLK:MBNL1:SCHIP1:GNB4:SH3TC1:PCDH7:SEMA5A:VCAN:CXCL14:PPP2R2B:SLIT3:PDLIM7:COL23A1:DST:PRDM1:AHI1:QKI:RELN:LAMB1:LEP:RBPMS:SULF1:MTSS1:MAMDC2:SVEP1:GSN:CCDC3:NRP1:EGR2:KCNMA1:SORBS1:SORCS1:PTPRE:EBF3:MICAL2:CCDC85B:MRGPRF:ARHGAP20:CADM1:TAGLN:NTF3:LIMA1:GRASP:LRP1:COL4A1:CO…
16	Curated_gene_sets	NABA_CORE_MATRISOME	254	64	1.9982e-08	8.11144e-06	VWA1:RSPO1:COL9A2:THBS3:BCAN:TNR:NID1:LTBP1:FBLN7:COL5A2:IGFBP5:COL6A3:SNED1:FBLN2:IGSF10:IGFBP7:SPARCL1:SPOCK3:EGFLAM:VCAN:HAPLN1:EDIL3:FBN2:SLIT3:COL23A1:TNXB:COL11A2:COL21A1:EYS:COL9A1:LAMA4:COL10A1:SMOC2:VWDE:IGFBP1:RELN:LAMB1:LAMB4:RSPO2:SVEP1:COL13A1:SLIT1:TECTB:VWA2:DMBT1:SPON1:NELL1:MGP:NELL2:LUM:DCN:COL4A1:COL4A2:COCH:NID2:THSD4:ZP2:NTN1:NCAN:COL9A3:COL20A1:COL18A1:COL6A1:CHADL
17	Curated_gene_sets	REACTOME_EXTRACELLULAR_MATRIX_ORGANIZATION	284	69	2.75631e-08	9.99322e-06	COL9A2:BCAN:TNR:CAPN9:NID1:LTBP1:NRXN1:LOXL3:COL5A2:COL6A3:FBLN2:CAPN7:ITGA9:CD47:ITGB5:PLOD2:ADAMTS3:SPOCK3:VCAN:HAPLN1:FBN2:ADAM19:COL23A1:TNXB:COL11A2:COL21A1:DST:COL9A1:LAMA4:COL10A1:LAMB1:CTSB:MUSK:ITGA8:COL13A1:TLL2:SH3PXD2A:ADAM12:CD151:ITGB7:LUM:DCN:COL4A1:COL4A2:NID2:PPIB:LOXL1:FURIN:ADAMTS18:ITGAE:ITGA2B:ITGB3:PRKCA:ITGB4:TIMP2:PTPRS:ICAM1:ICAM4:ICAM5:NCAN:GDF5:BMP7:COL9A3:COL20A1:APP:A…
18	Curated_gene_sets	DACOSTA_UV_RESPONSE_VIA_ERCC3_COMMON_DN	442	96	2.76948e-08	9.99322e-06	STIL:ZFYVE9:ZZZ3:DPYD:RGS7:ROCK2:PUM2:NCOA1:WDR43:LRPPRC:MSH2:EHBP1:R3HDM1:KIF5C:PKP4:BAZ2B:STK39:TLK1:COL5A2:SATB2:KLF7:TRIP12:AGAP1:TRAK1:WNT5A:FILIP1L:BBX:ZNF148:MBNL1:SCHIP1:AFAP1:LIMCH1:FGF5:TSPAN5:SEMA5A:MAP1B:RASA1:MAN2A1:NREP:CDYL:FARS2:JARID2:CAP2:DST:ZNF292:ASCC3:REV3L:FYN:HIVEP2:PCMT1:QKI:MPP6:CDK13:PTPN12:TRRAP:CUX1:MKLN1:CUL1:DLC1:STAU2:STK3:UBR5:ZHX2:PTK2:SMARCA2:DAPK1:RABGAP1:ZMYND…
19	Curated_gene_sets	RIGGI_EWING_SARCOMA_PROGENITOR_DN	186	51	2.92428e-08	9.99644e-06	SLC2A5:PDE4B:WLS:PTGFR:DPYD:PRRX1:CHI3L1:RRM2:NRP2:LRRFIP1:GALNT15:VEPH1:MFI2:CLGN:ANXA10:VCAN:NREP:EBF1:SLIT3:GFPT2:RUNX2:LAMA4:COL10A1:PDE7B:RPS6KA2:GSAP:HGF:PTN:PSD3:CSGALNACT1:STC1:CLU:SVEP1:NRP1:CXCL12:BICC1:ADAM12:IGF2:SPON1:FIBIN:MRGPRF:SRGAP1:LUM:DCN:KCTD4:ALDH1A3:ADORA2B:PIEZO2:NEDD4L:PLCB1:GDF5
20	Curated_gene_sets	LINDGREN_BLADDER_CANCER_HIGH_RECURRENCE	47	21	4.63611e-08	1.50558e-05	UBR4:RHBG:PRRX1:COL5A2:NRP2:MYLK:VCAN:ADAM19:FYN:LAMA4:PAPPA:MICAL2:NAV2:MGP:NR4A1:COL4A2:NID2:CD97:MYADM:MYL9:COL18A1
21	Curated_gene_sets	MIKKELSEN_MEF_HCP_WITH_H3_UNMETHYLATED	184	50	5.44798e-08	1.68498e-05	VWA1:SLC2A5:IL12RB2:OLFM3:SYNPR:IL20RB:SLC25A31:PCDHA1:PCDHA2:PCDHA3:PCDHA4:PCDHA5:PCDHA6:PCDHA7:PCDHA9:PCDHA10:PCDHA11:PCDHA12:PCDHA13:PCDHAC1:PCDHB5:NSD1:NRSN1:CLVS2:CNTNAP2:DPP6:HTR5A:EPPK1:GSN:SPAG6:PLCE1:NPAS4:CCDC67:ACRBP:ZNF385A:NOS1:PIWIL1:LTB4R:TRPM1:DPEP3:NLGN2:SOX15:RCVRN:KRT26:GFAP:HSF5:DLGAP1:ZNF516:JAK3:KLK10:COL9A3:CACNG2
22	Curated_gene_sets	BENPORATH_PRC2_TARGETS	588	118	8.13896e-08	2.40284e-05	TP73:IGSF21:PAX7:GRIK3:RSPO1:COL9A2:FOXD2:PTGER3:LHX8:PTGFR:ASTN1:FAM163A:WNT3A:TRIM67:SLC35F3:VAX2:ATOH8:CD8A:MAL:FBLN7:ZEB2:HOXD13:TMEFF2:ERBB4:SGPP2:SLCO2A1:CLSTN2:DGKG:GABRA4:EPHA5:FGF5:SCD5:DCLK2:DCHS2:SPOCK3:SLC9A3:CTNND2:FBN2:CXCL14:NRG2:DGKI:CSMD1:GATA4:NEFM:SLCO5A1:HEY1:GDF6:RSPO2:CSMD3:FBP1:LPPR1:PAPPA:ASTN2:LMX1B:CACNA1B:ADARB2:SPAG6:PRKG1:KCNMA1:SLIT1:PAX2:SORCS3:SORCS1:ADRA2A:SPON1:N…
23	Curated_gene_sets	BENPORATH_EED_TARGETS	935	171	1.05392e-07	2.97619e-05	TP73:LRRC47:IGSF21:PAX7:ARID1A:GRIK3:RSPO1:YRDC:COL9A2:FOXD2:WLS:PTGER3:LHX8:PTGFR:GFI1:ASTN1:FAM163A:WNT3A:TRIM67:SLC35F3:TGFA:VAX2:ATOH8:CD8A:MAL:INPP4A:FBLN7:ZEB2:HOXD13:TMEFF2:ERBB4:SGPP2:SLCO2A1:ESYT3:CLSTN2:DGKG:SORCS2:GABRA4:IGFBP7:EPHA5:FGF5:SCD5:PCDH10:DCLK2:DCHS2:SPOCK3:SLC9A3:CTNND2:CRHBP:FBN2:CXCL14:NRG2:GALNT10:EBF1:HIST1H3A:HIST1H3B:HIST1H3C:HIST1H3D:HIST1H3E:HIST1H3F:HIST1H3G:HIST1…
24	Curated_gene_sets	CUI_TCF21_TARGETS_2_DN	778	147	1.1442e-07	3.0965e-05	AKIRIN1:PDE4B:RABGAP1L:CDC73:TMCC2:LYST:NID1:PUM2:INPP4A:ZEB2:TANC1:RAPGEF4:HECW2:CFLAR:WDFY1:LRRFIP1:FGD5:ITGA9:PTPRG:VGLL3:BBX:CD47:ITGB5:SLCO2A1:PLOD2:GYG1:WWTR1:MED12L:SCHIP1:LDB2:TBC1D1:APBB2:GABRA4:LIN54:TSPAN5:LRBA:SEMA5A:ANKRD33B:ZFR:SLC38A9:LNPEP:MCC:SYNPO:IRGM:GALNT10:EBF1:TENM2:SERPINB6:CDYL:RANBP9:JARID2:DCDC2:NOTCH4:DST:MYO6:PRDM1:FYN:TCF21:SGK1:HIVEP2:QKI:GPR146:RAPGEF5:PRR15:GGCT:P…
25	Curated_gene_sets	REACTOME_ECM_PROTEOGLYCANS	71	26	1.67609e-07	4.35449e-05	COL9A2:BCAN:TNR:COL5A2:COL6A3:ITGA9:ITGB5:VCAN:HAPLN1:TNXB:COL9A1:LAMA4:LAMB1:MUSK:ITGA8:LUM:DCN:COL4A1:COL4A2:ITGA2B:ITGB3:PTPRS:NCAN:COL9A3:APP:COL6A1
26	Curated_gene_sets	PEREZ_TP53_TARGETS	1059	188	2.14841e-07	5.36689e-05	VWA1:MMEL1:TP73:ZBTB48:CAMTA1:ESPNP:ECE1:LUZP1:LDLRAP1:CNKSR1:GRIK3:EDN2:ZYG11B:WDR47:FAM46C:ANXA9:TMCC2:CNIH4:OBSCN:GREB1:CNNM4:ZAP70:INPP4A:MFSD9:HOXD10:COL5A2:CFLAR:PLEKHM3:TNS1:AGAP1:FGD5:ITGA9:TRAK1:LIMD1:LTF:ZBTB20:KALRN:ZXDC:MBNL1:TBC1D14:SH3TC1:GABRA4:ABCG2:CASP6:STOX2:SORBS2:UBE2QL1:EGFLAM:VCAN:MCC:ALDH7A1:CXCL14:KLHL3:NRG2:GALNT10:NIPAL4:MAML1:RNF144B:TRIM26:HLA-DMB:ETV7:POLH:COL21A1:MY…
27	Curated_gene_sets	RODRIGUES_THYROID_CARCINOMA_POORLY_DIFFERENTIATED_DN	717	136	2.73324e-07	6.57496e-05	RERE:ZNF362:GPBP1L1:CACHD1:DCAF8:DCAF8:MARC2:OPN3:AKT3:TTC7A:PAPOLG:WDPCP:PCYOX1:REV1:ST6GAL2:ZEB2:PKP4:CFLAR:ABI2:FZD5:TNS1:SGPP2:CUL3:LRRFIP1:SNED1:VGLL4:MRPS25:ANKRD28:RBMS3:GPD1L:TRAK1:LIMD1:PTPRG:PRICKLE2:FOXP1:BBX:CD47:ZBTB20:NDUFB4:MYLK:MBNL1:PROM1:TBC1D1:APBB2:LIMCH1:SCD5:CDS1:PDLIM5:TSPAN5:CASP6:SORBS2:MRPS30:ZBED3:GALNT10:NSD1:ATXN1:RNF144B:LAMA4:SGK1:HIVEP2:EPM2A:TIAM2:ARID1B:SYNJ2:RAP…
28	Curated_gene_sets	GRYDER_PAX3FOXO1_ENHANCERS_IN_TADS	942	170	2.84121e-07	6.59059e-05	RERE:ARID1A:RRAGC:FAF1:PGM1:DNTTIP2:PTGFRN:KCNN3:PIGC:NAV1:RRP15:ENAH:GALNT2:PGBD5:KCNS3:HS1BP3:NCOA1:WDR43:ALK:MSH6:VAX2:TCF7L1:ATOH8:ST6GAL2:ZEB2:SATB2:NRP2:CUL3:AGAP1:LRRFIP1:SUMF1:LMCD1:LRRFIP2:LIMD1:FOXP1:VGLL3:PHLDB2:TAGLN3:XRN1:IGF2BP2:AFAP1:TBC1D1:APBB2:LIMCH1:ANTXR2:WDFY3:ANK2:PGRMC2:SPOCK3:NDUFS4:SLC38A9:MSH3:RGMB:MAN2A1:MCC:H2AFY:ADAM19:SPDL1:NPM1:CDYL:FARS2:JARID2:ATXN1:ZFAND3:ASCC3:R…
29	Curated_gene_sets	WONG_ADULT_TISSUE_STEM_MODULE	667	128	3.19394e-07	7.15333e-05	CLIC4:MPL:PTGER3:GBP2:SELP:ASTN1:PTGS2:NAV1:CR2:IRF6:ENAH:NID1:LTBP1:IGFBP5:LRRFIP1:FBLN2:MITF:FOXP1:PHLDB2:TAGLN3:ZBTB20:MYLK:ITGB5:ESYT3:RBP1:IGSF10:DGKG:MUC4:SORCS2:UGDH:LIMCH1:REST:IGFBP7:EPHA5:FAM47E-STBD1:ANTXR2:ABCG2:PRDM5:IL15:NR2F1:NREP:CXCL14:SYNPO:IRGM:TENM2:GABBR1:HLA-DMA:DST:SENP6:FYN:SMOC2:PTPN12:MAGI2:SEMA3E:ABCB1:RELN:KMT2E:LAMB1:MDFIC:PTN:DLC1:RBPMS:SMARCA2:STXBP1:ZMYND11:DIP2C:I…
30	Curated_gene_sets	MIKKELSEN_NPC_HCP_WITH_H3K27ME3	327	73	4.14685e-07	8.95176e-05	PRKCZ:PRDM16:TP73:TNFRSF1B:IGSF21:PAX7:EPHA8:GRIK3:RSPO1:LHX8:GFI1:SYT2:WNT3A:PGBD5:KCNS3:ALK:MAL:DPP10:C1QL2:GALNT13:HOXD10:SGPP2:CLSTN2:ADRA2C:PPP2R2C:FAM47E-STBD1:FSTL4:CXCL14:RASGEF1C:TFAP2D:COBL:DLGAP2:PAPPA:GRIN1:CHAT:COL13A1:SORCS3:VWA2:TCERG1L:IGF2:NELL1:SYT12:DSCAML1:HOXC8:FOXN4:FGF14:GABRA5:GABRG3:SCNN1G:CDH8:CA7:PITPNM3:RAB11FIP4:IKZF3:CRHR1:IGF2BP1:CA10:LLGL2:RBFOX3:COLEC12:ST8SIA3:HC…
31	Curated_gene_sets	DODD_NASOPHARYNGEAL_CARCINOMA_UP	1525	254	4.27259e-07	8.95176e-05	PRKCZ:MMEL1:RERE:LDLRAP1:CNKSR1:MTF1:ZMYND12:MPL:ZSWIM5:AGBL4:WLS:ANXA9:RPTN:BCAN:ANKRD45:RGS8:PLEKHA6:CR2:SERTAD4:WDR26:CAPN9:EFCAB2:TPO:FKBP1B:TTC7A:MAL:FBLN7:GALNT5:CCDC148:DHRS9:OSBPL6:MARCH4:TNS1:LRRFIP1:ANKMY1:SNED1:CHL1:PPARG:OSBPL10:GPD1L:TRAK1:LTF:USP4:TEX264:PRKCD:FAM3D:FOXP1:HHLA2:KIAA2018:KALRN:CCDC37:RAB43:AMOTL2:IL20RB:KCNMB2:BCL6:MUC4:STX18:CC2D2A:PROM1:CWH43:CDS1:ADH6:ADH1C:TTC29:…
32	Curated_gene_sets	CREIGHTON_ENDOCRINE_THERAPY_RESISTANCE_5	437	91	4.672e-07	9.4827e-05	LDLRAP1:WLS:FAM73A:IGSF3:PTGFRN:MARC2:CAPN9:SMYD3:FAM110C:NCOA1:INPP4A:ORMDL1:KLF7:FZD5:ERBB4:CTNNB1:TRAK1:PRICKLE2:FOXP1:PHLDB2:ZBTB20:MBNL1:FGF12:FAM114A1:UGDH:LIMCH1:CDS1:GALNT7:CTNND2:MTMR12:GALNT10:RNF144B:FILIP1:FUT9:EPB41L2:LRP11:SYNJ2:QKI:MAFK:LFNG:NXPH1:AHR:FBXO25:MTUS1:PSD3:CPNE3:PLEKHF2:SPAG1:TTC39B:FBP1:GABBR2:GSN:STOM:NET1:SFMBT2:NEBL:ANK3:KCNMA1:FAM160B1:INPP5A:SWAP70:PLEKHA7:NUCB2:…
33	Curated_gene_sets	REACTOME_SIGNALING_BY_RECEPTOR_TYROSINE_KINASES	495	100	5.7242e-07	0.000112663	PRKCZ:ID3:LCK:COL9A2:MKNK1:THBS3:AKT3:ROCK2:ALK:TGFA:STAM2:COL5A2:ABI2:NRP2:ERBB4:COL6A3:CTNNB1:MAPKAPK3:PRKCD:KLB:GABRB1:REST:POLR2B:FGF5:PIK3R1:RASA1:FER:NRG2:RANBP9:COL11A2:MAPK14:COL9A1:PRDM1:FYN:LAMA4:SGK1:RPS6KA2:ELMO1:PTPN12:HGF:LAMB1:PTPRZ1:PTN:PLAT:WWP1:PTK2:DNM1:RALGDS:NRP1:CXCL12:EGR2:FGFR2:ADAM12:DOCK1:IGF2:PTPRJ:CTNND1:TCIRG1:GAB2:CUL5:CBL:NTF3:PTPRO:FRS2:FGF9:FLT1:GTF2F2:IRS2:COL4A1…
34	Curated_gene_sets	CHARAFE_BREAST_CANCER_LUMINAL_VS_MESENCHYMAL_DN	434	90	6.51403e-07	0.000124437	LUZP1:STIL:ZYG11B:WLS:AK5:DPYD:NMNAT2:PTGS2:NAV1:GALNT2:AKT3:RTN4:EHBP1:ANTXR1:COL6A3:ASB1:HRH1:ANKRD28:RBMS3:CMTM7:PTPRG:PHLDB2:MYLK:WWTR1:IGF2BP2:TBC1D1:IGFBP7:ANTXR2:IL15:ANKRD33B:MAP1B:EDIL3:NR2F1:FER:PTTG1:SPDL1:GFPT2:SERPINB1:RNF182:RUNX2:ECHDC1:EPB41L2:EYA4:SGK1:PDE7B:QKI:FSCN1:DPY19L1:CLIP2:LAMB1:MDFIC:CAV2:PLAT:GLIS3:PAPPA:DNM1:NRP1:BICC1:COL13A1:PLAU:VCL:PRKCDBP:PARVA:TEAD1:PICALM:UBASH…
35	Curated_gene_sets	HATADA_METHYLATED_IN_LUNG_CANCER_UP	350	76	7.64382e-07	0.000141847	AJAP1:LCK:FAF1:NHLH2:DTNB:MAL:ST6GAL2:CNTNAP5:KCNH7:RAPGEF4:HOXD13:GALNT15:ZBTB47:AMIGO3:GMPPB:CADPS:TF:PROM1:EPHA5:PRDM8:ANK2:PRRC1:PCDHGA3:PCDHGB2:CANX:GFPT2:TFAP2A:GFOD1:ETV7:POLH:ECHDC1:TCF21:AHI1:HOXA7:TBX20:HTR5A:CSMD1:DLC1:NEFM:PLEKHF2:RSPO2:FBP1:OLFM1:SPAG6:CXCL12:TLL2:SUFU:LHPP:LSP1:RIC3:NELL1:TAGLN:CACNA1C:KRT72:TMED2:ATP8A2:CIDEB:NID2:BEGAIN:RYR3:IL16:TMEM204:CA7:DPEP3:CDH13:GP1BA:SLC4…
36	Curated_gene_sets	ACEVEDO_METHYLATED_IN_LIVER_CANCER_DN	698	131	8.22578e-07	0.000148407	AJAP1:CAMTA1:TNFRSF8:EPHA8:LUZP1:MKNK1:GLIS1:AK5:LOR:OR10K1:RGS13:NAV1:NFASC:TMCC2:WDR26:OBSCN:DISC1:OR2L13:TPO:SLC3A1:ZAP70:KIF5C:HOXD13:OR6B2:HRH1:FGD5:FOXP1:CD86:KALRN:NMNAT3:CLSTN2:TRIM42:SSR3:KCNMB2:DGKG:MUC4:JAKMIP1:PPP2R2C:LIMCH1:NPFFR2:TSPAN5:ANK2:FAM160A1:DCHS2:GALNT7:ASB5:SLC6A19:SLC6A18:EGFLAM:FYB:MCC:PKD2L2:PCDHA11:PCDHA13:PCDHGA2:TENM2:RASGEF1C:F13A1:COL9A1:FILIP1:FHL5:FYN:AHI1:ADGB:…
37	Curated_gene_sets	NABA_MATRISOME	947	166	2.48525e-06	0.000436261	VWA1:FCN3:RSPO1:COL9A2:ANXA9:RPTN:THBS3:SEMA4A:BCAN:TNR:F13B:WNT3A:NID1:TPO:COLEC11:LTBP1:TGFA:LOXL3:FBLN7:C1QL2:COL5A2:VWC2L:IGFBP5:COL6A3:SNED1:FBLN2:CLEC3B:ITIH1:WNT5A:PLOD2:IGSF10:FGF12:MUC4:IGFBP7:ADAMTS3:FGF5:SPARCL1:IL15:SPOCK3:ANXA10:SEMA5A:EGFLAM:CRHBP:VCAN:HAPLN1:EDIL3:FBN2:CXCL14:NRG2:ADAM19:C1QTNF2:SLIT3:COL23A1:SERPINB1:SERPINB6:F13A1:TNXB:COL11A2:COL21A1:EYS:COL9A1:LAMA4:COL10A1:SMO…
38	Curated_gene_sets	MEISSNER_NPC_HCP_WITH_H3K4ME3_AND_H3K27ME3	141	38	2.5673e-06	0.000438806	PTCHD2:AK5:NMNAT2:ATOH8:SH3RF3:KIF5C:IGF2BP2:FGF5:CDS1:ANKRD33B:ELFN1:RELN:GRM8:CSMD1:NEFM:GDF6:RSPO2:CXCL12:KCNMA1:ADRA2A:TSPAN18:B4GALNT3:KCNH3:HOXC4:HOXC4:FGF9:FLT1:GPC5:COCH:MAP3K9:WDR20:GREM1:BMF:ST8SIA2:SYNM:ADORA2B:MYO1D:PDE4A:CDH22
39	Curated_gene_sets	LINDGREN_BLADDER_CANCER_CLUSTER_2B	355	75	2.66606e-06	0.000444002	UBE2J2:CLIC4:LCK:FAM46C:GJA5:PRRX1:RGL1:TTC7A:ZAP70:COL5A2:NRP2:TNS1:COL6A3:LMCD1:FBLN2:FILIP1L:MYLK:AMOTL2:RBP1:PCDH7:RHOH:IGFBP7:LEF1:FYB:EDIL3:NR2F1:SYNPO:ADAM19:EBF1:NEURL1B:GFOD1:UBD:HLA-DMA:RUNX2:FYN:LAMA4:EPB41L2:LAT2:PDGFRL:PNOC:PTK2:SVEP1:PAPPA:GSN:STOM:NEK6:CELF2:CXCL12:MICAL2:APLNR:MGP:NR4A1:LUM:LIG4:STXBP6:NID2:PRKCH:IL16:COTL1:CCL15:TIMP2:COLEC12:TCF4:MALT1:NFATC1:ICAM1:CD97:JAK3:MYA…
40	Curated_gene_sets	KEGG_ECM_RECEPTOR_INTERACTION	81	26	3.07084e-06	0.000498628	THBS3:TNR:COL5A2:COL6A3:ITGA9:CD47:ITGB5:GP9:GP5:TNXB:COL11A2:LAMA4:RELN:LAMB1:LAMB4:ITGA8:ITGB7:COL4A1:COL4A2:SV2B:GP1BA:ITGA2B:ITGB3:ITGB4:GP6:COL6A1
41	Curated_gene_sets	REACTOME_NERVOUS_SYSTEM_DEVELOPMENT	521	100	6.11206e-06	0.000968241	EPHA8:COL9A2:DAB1:SEMA4A:MPZ:NFASC:ENAH:ROCK2:PSME4:SCN1A:SCN9A:COL5A2:NRP2:COL6A3:CHL1:ITGA9:ROBO2:GAP43:KALRN:WWTR1:EPHA5:SCD5:ANK2:SEMA5A:PIK3R1:RASA1:RGMB:SLIT3:PDLIM7:RANBP9:CAP2:MAPK14:COL9A1:FYN:RPS6KA2:SEMA3E:RELN:LAMB1:UNC5D:ANK1:PTK2:ARHGAP39:SEMA4D:DNM1:LHX3:GRIN1:UPF2:NRP1:CUL2:CXCL12:ANK3:EGR2:SLIT1:DOCK1:TEAD1:GAB2:DSCAML1:ARHGEF12:ROBO3:CACNA1C:NELL2:TUBA1B:SRGAP1:FRS2:PLXNC1:TRPC4…
42	Curated_gene_sets	PICCALUGA_ANGIOIMMUNOBLASTIC_LYMPHOMA_UP	202	48	6.5447e-06	0.00100554	WLS:CTTNBP2NL:PRRX1:RGL1:CHI3L1:ANTXR1:SEPT10:TANC1:IGFBP5:TNS1:ITGA9:MYLK:WWTR1:FAM114A1:IGFBP7:WDFY3:SPARCL1:PDLIM5:ANK2:GABBR1:C2:LAMA4:SMOC2:LAMB1:CAV2:CLU:RBPMS:SULF1:PTGDS:CXCL12:KCNMA1:ADRA2A:PARVA:ARHGAP42:TAGLN:LUM:DCLK1:COL4A1:COL4A2:IFI27:LOXL1:GPRC5B:CCL14:CCL15-CCL14:ANKRD29:CCDC102B:MYL9:ADAMTS1:COL6A1
43	Curated_gene_sets	ONDER_CDH1_TARGETS_2_UP	231	53	6.65714e-06	0.00100554	ROR1:PTGFR:PRRX1:RGL1:NID1:LTBP1:COL5A2:SATB2:COL6A3:SNED1:LMCD1:PPARG:CLEC3B:WNT5A:MITF:PLOD2:UGDH:IGFBP7:SEMA5A:CDH18:MAP1B:VCAN:NR2F1:NREP:H2AFY:GALNT10:RPS6KA2:DGKI:DLC1:PDGFRL:PRUNE2:NEBL:NRP1:BICC1:KCNMA1:ADAM12:MICAL2:NAV2:ZBTB16:TAGLN:WNT5B:EPS8:DCN:ENOX1:PCDH9:ITGBL1:NID2:GREM1:SYNM:PRKCA:CDH2:MYL9:COL6A1
44	Curated_gene_sets	CARRILLOREIXACH_HEPATOBLASTOMA_VS_NORMAL_HYPOMETHYLATED_AND_UP	159	40	8.90042e-06	0.00131382	RERE:ZSWIM5:PTPN14:RRM2:GREB1:ANTXR1:UGGT1:R3HDM1:STK39:NRP2:COL6A3:SMARCC1:IGF2BP2:MAP1B:RASGRF2:VCAN:EDIL3:SLIT3:NPM1:F13A1:LAMA4:SMOC2:LAMB1:STC1:KCNU1:SNTG1:SULF1:ITGA8:MGP:PLXNC1:COL4A1:COL4A2:UACA:CDH13:MYO1D:IGF2BP1:PIEZO2:TCF4:ADRBK2:ZNRF3
45	Curated_gene_sets	CHICAS_RB1_TARGETS_CONFLUENT	526	100	9.29475e-06	0.00132615	HIVEP3:ROR1:AK5:GBP2:FAM46C:RABGAP1L:OPN3:LIMS2:GALNT5:SCN9A:FAM171B:COL5A2:KLF7:PPARG:GALNT15:CLEC3B:LIMD1:CNTN3:VGLL3:MYLK:RBP1:KCNMB2:CORIN:TSPAN5:MAP1B:RGMB:NREP:FBN2:H2AFY:SYNPO:GALNT10:SGCD:ADAM19:PDLIM7:KDM1B:LAMA4:EPB41L2:OSBPL3:RSBN1L:RELN:CAV2:PTN:KCNH2:PDGFRL:MTUS1:CLU:SULF1:RUNX1T1:BAALC:MTSS1:CDKN2A:GSN:OPTN:NRP1:CXCL12:KCNMA1:PRKCDBP:RRAS2:NAV2:MRGPRF:ANO1:CADM1:TAGLN:WNT5B:TUBA1B:S…
46	Curated_gene_sets	GOZGIT_ESR1_TARGETS_DN	664	121	9.39228e-06	0.00132615	GRIK3:TTC39A:WLS:IFI44L:GBP2:DPYD:SLC19A2:ENAH:PGBD5:CAPN9:GREB1:TGFA:KLF7:MAP2:ERBB4:IGFBP5:LMCD1:TRANK1:PTPRG:PRICKLE2:MITF:FOXP1:PLCXD2:CPNE4:BCL6:PCDH7:FAM114A1:UGDH:APBB2:SCD5:PDLIM5:PCDH10:UBE2QL1:CTNND2:PRLR:NNT:NREP:CAP2:RNF144B:DCDC2:GABBR1:RUNX2:MYO6:FUT9:SGK1:AHI1:RPS6KA2:SDK1:AHR:BLVRA:CAV2:TMEM140:HIPK2:PDGFRL:PSD3:STC1:CLU:RBPMS:SDR16C5:SULF1:GRHL2:ZHX2:FBXO32:MTSS1:PTK2:FAM189A2:FB…
47	Curated_gene_sets	BOQUEST_STEM_CELL_UP	240	54	1.00049e-05	0.00138259	ROR1:PTGFR:PRRX1:PLA2G4A:LRP1B:COL5A2:COL6A3:HDAC4:CHL1:WNT5A:ACOX2:PTPRG:MITF:TMEM45A:UGDH:ADH1C:ANK2:VCAN:CXCL14:SGCD:SLIT3:GFPT2:BBS9:PDGFRL:PTPRD:SVEP1:GSN:PTGDS:NET1:CELF2:ITGA8:CXCL12:GDF10:BICC1:MGP:LRP1:LUM:DCN:DCLK1:PCDH9:ITGBL1:IRS2:F10:SERPINA5:MEG3:ASPA:GAS7:ABCA6:COLEC12:MBP:AXL:HAS1:SLC2A10:COL6A1
48	Curated_gene_sets	KIM_MYC_AMPLIFICATION_TARGETS_DN	96	28	1.03963e-05	0.00140675	PPCS:CFLAR:KCNMB2:SORBS2:ELOVL7:MYO6:ZNF292:CCDC146:PTPRN2:PLEKHA2:SPAG1:GRHL2:TTC39B:CCDC171:PRUNE2:OPTN:NEBL:SPAG6:NUCB2:GAB2:KIRREL3:SCNN1A:RMST:DCLK1:RORA:ADAMTS18:ATCAY:ZNF468
49	Curated_gene_sets	CHANDRAN_METASTASIS_DN	289	62	1.1494e-05	0.00151049	CACHD1:PDE4B:PRRX1:PTGS2:LIMS2:WDR33:SFT2D3:TNS1:PRICKLE2:CNTN3:ROBO2:LSAMP:MYLK:PCDH7:CWH43:ANTXR2:SCD5:RNF150:SPOCK3:SORBS2:MCC:ALDH7A1:TNIP1:GABBR1:AMD1:NT5DC1:ECHDC1:EYA4:AHI1:SMOC2:LFNG:CAV2:PTN:PTPRN2:PSD3:RORB:ZMYND11:ITIH5:EGR2:COL13A1:SORBS1:FGFR2:LHPP:MRGPRF:WNT5B:PDZRN4:SMAGP:NR4A1:ASB2:SMAD3:THSD4:FBXO22:CLCN7:ERBB2:GHDC:RBFOX3:FOSB:KLK10:KLK11:NECAB3:BMP7:PMEPA1:UPK3A
50	Curated_gene_sets	DURAND_STROMA_S_UP	265	58	1.16281e-05	0.00151049	SELP:ADCY3:TCF7L1:IL18RAP:NCKAP5:GALNT13:TMEFF2:SORCS2:RNF150:IL15:DCLK2:FYB:PDE4D:ADAM19:SERPINB1:SERPINB6:TFAP2A:NOTCH4:HLA-DMA:EYA4:LRP11:SMOC2:PRKAR1B:ELFN1:AHR:TBX20:PTN:CSGALNACT1:PLEKHA2:RSPO2:RORB:PRUNE2:SVEP1:PAPPA:CXCL12:FGFR2:ADAM12:EBF3:RAB3IL1:MRGPRF:UBASH3B:KIRREL3:HOXC8:RALGAPA1:NID2:IFI27:PPP1R13B:LOXL1:GNAO1:CDYL2:MYO1D:HOXB13:PHOSPHO1:ARHGAP28:NFATC1:HCN2:JAK3:SCN1B
51	Curated_gene_sets	GENTILE_UV_LOW_DOSE_DN	59	20	1.67327e-05	0.00213096	PEX14:EHBP1:STK39:SATB2:IGFBP5:SEMA5A:CDH18:RASA1:CXCL12:COL13A1:DOCK1:MICAL2:DDX10:ERC1:NAV3:SAMD4A:SIPA1L1:WWOX:CDH2:COL6A1
52	Curated_gene_sets	CHEMNITZ_RESPONSE_TO_PROSTAGLANDIN_E2_DN	355	72	1.83271e-05	0.00228912	ICMT:CAMTA1:CLIC4:ZMYND12:GPBP1L1:IL12RB2:KCNT2:OPN3:GRHL1:CCDC148:SATB2:CHL1:HRH1:XPC:TBC1D5:OSBPL10:LRRFIP2:WNT5A:MITF:ZBTB20:SCHIP1:PROM1:CDS1:WDFY3:SEMA5A:EDIL3:SIRT5:KCNK5:PTCHD4:PDSS2:REV3L:LINC00271:RPS6KA2:AHR:MACC1:COBL:SUMF2:CLDN12:LMTK2:CUX1:NAPEPLD:RELN:EXOC4:NKAIN3:PTPRD:PAPPA:ASTN2:LINC00963:SPAG6:BICC1:PAX2:PLEKHA7:SCNN1A:PPFIBP1:LRRK2:SMAGP:LMO7:STXBP6:SIPA1L1:NRXN3:IQCH:FBXL16:IF…
53	Curated_gene_sets	WP_PRIMARY_FOCAL_SEGMENTAL_GLOMERULOSCLEROSIS_FSGS	69	22	1.94804e-05	0.00238727	IRF6:CTNNB1:SYNPO:FYN:KRT8P3:PTK2:LMX1B:DNM1:NOTCH1:VCL:PLCE1:PAX2:CD151:PARVA:WT1:KIRREL3:PTPRO:KRT8:AKT1:MYO1E:ITGB3:ITGB4:CDH2
54	Curated_gene_sets	MANNE_COVID19_COMBINED_COHORT_VS_HEALTHY_DONOR_PLATELETS_DN	199	46	2.14819e-05	0.0025838	WLS:DPYD:ENAH:GRHL1:SEPT10:HECW2:IGFBP5:TNS1:FGD5:ERC2:CPNE4:P2RY12:LDB2:BANK1:CTNND2:ANKRD55:SYNPO:CDYL:DCDC2:HLA-DMB:SDK1:TFPI2:GPIHBP1:PTPRD:PAX5:PAPPA:ZNF438:CXCL12:CPXM2:ADAM12:IGF2:NR4A1:LIG4:COL4A1:COL4A2:STXBP6:CEP128:DLK1:KIAA1024:WWOX:IRF8:PPM1E:SIGLEC12:PLCB1:PHACTR3:MAP3K7CL
55	Curated_gene_sets	SCHUETZ_BREAST_CANCER_DUCTAL_INVASIVE_UP	326	67	2.27362e-05	0.00268494	ROR1:DPYD:PRRX1:NID1:AKT3:ZEB2:COL5A2:COL6A3:LMCD1:FBLN2:WWTR1:LDB2:IGFBP7:SPARCL1:MAP1B:VCAN:NREP:FBN2:SGCD:ADAM19:GFPT2:HLA-DQB2:HLA-DMB:HLA-DMA:FYN:LAMA4:COL10A1:SGK1:QKI:SKAP2:DPY19L1:LAMB1:SULF1:HEY1:CELF2:NRP1:BICC1:PLAU:ADAM12:PRKCDBP:MICAL2:PARVA:SPON1:MS4A6A:NOX4:LUM:DCN:PLXNC1:ITGBL1:COL4A1:COL4A2:NID2:SAMD4A:NDN:GREM1:LOXL1:TMEM204:PLCG2:IRF8:COLEC12:LDLRAD4:TCF4:AXL:MYL9:PMEPA1:ERG:CO…
56	Curated_gene_sets	FOROUTAN_TGFB_EMT_UP	188	44	2.32435e-05	0.00269583	AKT3:COL5A2:KLF7:IGFBP5:TNS1:COL6A3:LMCD1:HRH1:WNT5A:VGLL3:SLCO2A1:FAM114A1:APBB2:IGFBP7:VCAN:NREP:GALNT10:ADAM19:SPDL1:PDLIM7:GFPT2:JARID2:RUNX2:TFPI2:DLC1:STC1:KCNMA1:ADAM12:MICAL2:CD59:TAGLN:WNT5B:LUM:COL4A1:COL4A2:DAAM1:GREM1:ITGB3:TIMP2:CDH2:TCF4:TPM4:MYL9:PMEPA1
57	Curated_gene_sets	DAVICIONI_MOLECULAR_ARMS_VS_ERMS_UP	308	64	2.40957e-05	0.00274564	KCNN3:PGBD5:DISC1:AKT3:NCOA1:ALK:PKP4:RAPGEF4:SATB2:KLF7:CUL3:LRRFIP2:CD47:TAGLN3:ADRA2C:QDPR:ANK2:SEMA5A:NNT:CCNH:CDYL:TFAP2A:JARID2:DST:ASCC3:PCMT1:ELMO1:COBL:POR:MAGI2:VIPR2:DLGAP2:CHD7:KDM4C:PTPRD:GNE:PAX5:DAPK1:CDC14B:LPPR1:ASTN2:NOTCH1:NET1:SGMS1:ADK:PAX2:ADRA2A:FGFR2:NELL1:DOCK9:SAMD4A:SYNE2:GREM1:RYR3:MYO1E:NTRK3:WWOX:FAM64A:TTC19:TEX2:BLCAP:EYA2:ABCG1:COL18A1
58	Curated_gene_sets	REACTOME_INTEGRIN_CELL_SURFACE_INTERACTIONS	80	24	2.60691e-05	0.00291929	COL9A2:COL5A2:COL6A3:ITGA9:CD47:ITGB5:COL23A1:COL9A1:COL10A1:ITGA8:COL13A1:ITGB7:LUM:COL4A1:COL4A2:ITGAE:ITGA2B:ITGB3:ICAM1:ICAM4:ICAM5:COL9A3:COL18A1:COL6A1
59	Curated_gene_sets	KEGG_FOCAL_ADHESION	190	44	3.06072e-05	0.00336939	THBS3:TNR:AKT3:ROCK2:COL5A2:COL6A3:ITGA9:CTNNB1:MYLK:ITGB5:PIK3R1:TNXB:COL11A2:FYN:LAMA4:HGF:RELN:LAMB1:LAMB4:CAV2:PTK2:ITGA8:VCL:DOCK1:PARVA:BIRC2:ITGB7:FLT1:COL4A1:COL4A2:AKT1:PAK6:TLN2:MAP2K1:ERBB2:ITGA2B:ITGB3:PRKCA:ITGB4:PIP5K1C:ARHGAP35:PRKCG:MYL9:COL6A1
60	Curated_gene_sets	REACTOME_COLLAGEN_FORMATION	86	25	3.23138e-05	0.00349797	COL9A2:LOXL3:COL5A2:COL6A3:PLOD2:ADAMTS3:COL23A1:COL11A2:COL21A1:DST:COL9A1:COL10A1:CTSB:COL13A1:TLL2:CD151:COL4A1:COL4A2:PPIB:LOXL1:ITGB4:COL9A3:COL20A1:COL18A1:COL6A1
61	Curated_gene_sets	MARTIN_VIRAL_GPCR_SIGNALING_DN	48	17	3.73958e-05	0.00394326	LGR6:TRAK1:CD86:TF:DGKQ:TBC1D1:FAM47E-STBD1:VCAN:MAN2A1:HIST1H1A:NOD1:RNF122:NEBL:WT1:OR5B12:SLCO1A2:SMPD3
62	Curated_gene_sets	REACTOME_DISEASES_ASSOCIATED_WITH_O_GLYCOSYLATION_OF_PROTEINS	62	20	3.80359e-05	0.00394326	MUC4:ADAMTS3:SEMA5A:NOTCH4:LFNG:MUC12:MUC17:RN7SKP54:NOTCH1:MUC6:MUC5B:SPON1:ADAMTS20:B3GALTL:THSD4:ADAMTSL3:ADAMTS18:ADAMTSL5:MUC16:ADAMTS1:LARGE
63	Curated_gene_sets	MEBARKI_HCC_PROGENITOR_WNT_UP_BLOCKED_BY_FZD8CRD	113	30	3.82487e-05	0.00394326	NAV1:DISC1:GNG4:ST6GAL2:COL5A2:KLF7:IGFBP5:PRICKLE2:PPP2R2C:LEF1:VCAN:HAPLN1:ALDH7A1:PDLIM7:LFNG:LZTS1:CLIC3:CCDC3:RARG:MDM1:LUM:DCN:CORO1C:STXBP6:BMF:NDRG4:NXN:TPM4:MYADM:ADRBK2
64	Curated_gene_sets	PEREZ_TP63_TARGETS	319	65	3.94212e-05	0.00394747	LUZP1:CACHD1:FAM46C:CNNM4:LIMS2:PLCD1:PLCXD2:LAMP3:PPP2R2C:FAM47E-STBD1:STOX2:SLC9A3:UBE2QL1:CXCL14:GFPT2:MAPK14:ARID1B:SYNJ2:MICALL2:ELFN1:AUTS2:KCNH2:DLC1:CLU:HEY1:EPPK1:SEMA4D:GABBR2:CLIC3:CELF2:IGF2:PTPRJ:WNT5B:ZNF385A:CTDSP2:SMAD9:ATP11A:GRTP1:PRKCH:SYNE2:PPP1R13B:PAK6:RORA:ST8SIA2:CRAMP1L:CX3CL1:CDYL2:DOC2B:ACAP1:NTN1:KSR1:RAB11FIP4:TNRC6C:NPTX1:NFATC1:APC2:TNPO2:DPF1:DEDD2:PPP1R16B:COL9A3:…
65	Curated_gene_sets	PANGAS_TUMOR_SUPPRESSION_BY_SMAD1_AND_SMAD5_UP	124	32	3.95051e-05	0.00394747	TTC39A:NAV1:NID1:FAM110C:RBMS3:RBP1:SORCS2:APBB2:STOX2:EYA4:PTPN12:CAV2:PRUNE2:SPIN1:GSN:CELF2:TRIM5:PRKCDBP:CACNA1C:ENOX1:MCF2L:SIPA1L1:HDGFRP3:TMEM204:ZNF423:DOC2B:UNC13D:TCF4:NFATC1:NFIX:PTPN1:BMP7
66	Curated_gene_sets	HOELZEL_NF1_TARGETS_DN	103	28	4.31925e-05	0.00420054	AK5:PLEKHA6:GREM2:ST6GAL2:IGFBP5:WNT5A:ROBO2:NR2F1:NREP:PCDHB2:AMPH:CUX1:CCDC3:MYRF:ST8SIA1:HOTAIR:HRK:DNAJC15:NTRK3:ST8SIA2:TMEM204:ZNF423:WWOX:ARHGAP28:LDLRAD4:RNF165:PHACTR3:ADAMTS1
67	Curated_gene_sets	BRUINS_UVC_RESPONSE_LATE	1023	170	4.33313e-05	0.00420054	PEX14:MECR:PGM1:PDE4B:LRRC8D:ACP6:SNX27:SELP:KIFAP3:MARC2:GALNT2:NID1:RGS7:TTC7A:MSH2:TGFA:LOXL3:STAM2:XIRP2:COL5A2:ORMDL1:PPIL3:COL6A3:CMC1:RBMS3:LRRFIP2:ACOX2:PTPRG:GAP43:GYG1:WWTR1:BCL6:STX18:SORCS2:HS3ST1:TBC1D1:FAM114A1:GABRB1:REST:PRKG2:TSPAN5:IL15:CTNND2:ELOVL7:ZBED3:CCNH:FER:CXCL14:SIL1:TNIP1:SGCD:PTTG1:SLIT3:NPM1:RUFY1:SQSTM1:ACOT13:COL11A2:QRSL1:RPF2:LAMA4:ECHDC1:PCMT1:TIAM2:SMOC2:AHR:O…
68	Curated_gene_sets	MANALO_HYPOXIA_UP	187	43	4.47512e-05	0.0042744	SPSB1:PGM1:GJA5:NFASC:OPN3:TCF7L1:TNS1:PPARG:FILIP1L:TMEM45A:PLOD2:BCL6:AFAP1:LIMCH1:SORBS2:SYNPO:ATXN1:HLA-B:NOTCH4:COL9A1:ZNF292:HIVEP2:RPS6KA2:CLIP2:LAMB1:STC1:SLCO5A1:ZHX2:MTSS1:CELF2:GDF10:CHST15:USP47:PTPRR:COL4A1:COL4A2:CX3CL1:PLCG2:CDH2:AXL:PPP1R13L:DLGAP4:COL18A1
69	Curated_gene_sets	PASINI_SUZ12_TARGETS_DN	296	61	4.76269e-05	0.00444099	SPSB1:WLS:GBP2:MLLT11:SERTAD4:KIF5C:KLF7:IGFBP5:LRRFIP1:UBE2E1:CMTM7:LIMD1:FOXP1:VGLL3:FILIP1L:PHLDB2:GAP43:AMOTL2:RBP1:PLOD2:WWTR1:PROM1:PDLIM5:VCAN:NREP:PDLIM7:PTPN12:SEMA3E:CLDN12:CAV2:KRT8P3:SULF1:GSN:FAM107B:VCL:ADK:SH3PXD2A:CD151:PARVA:RRAS2:TAGLN:WNK1:TSPAN9:PKP2:KRT8:CORO1C:IRS2:SAMD4A:MEG3:AKT1:ANXA2:CSNK1G1:TIMP2:COLEC12:CDH2:CTXN1:TPM4:AXL:MYADM:ZMYND8:GNAS:APP
70	Curated_gene_sets	CARRILLOREIXACH_MRS3_VS_LOWER_RISK_HEPATOBLASTOMA_DN	153	37	4.78629e-05	0.00444099	CLIC4:PDE4B:CTTNBP2NL:RGL1:PTGS2:NFASC:AKT3:LTBP1:ANTXR1:ZEB2:RBMS3:MITF:FILIP1L:GNB4:PCDH7:RNF150:PCDHGB7:SGCD:PRDM1:EPB41L2:MAMDC2:PLXDC2:ZNF438:CSGALNACT2:PRKG1:ANK3:SWAP70:MGP:LUM:DCN:IQGAP1:LINC00924:TIMP2:RAB31:TCF4:AXL:ADAMTS1
71	Curated_gene_sets	KIM_ALL_DISORDERS_CALB1_CORR_UP	501	93	4.8602e-05	0.00444606	WDR47:MLLT11:RUSC1:CREG1:KIFAP3:NMNAT2:RGS7:PUM2:LRPPRC:NRXN1:RTN4:EHBP1:SLC25A12:CHL1:GPD1L:KALRN:MBNL1:SCHIP1:LDB2:GPM6A:CRHBP:RASA1:PCSK1:NREP:H2AFY:PFDN1:CANX:CAP2:TDP2:HIVEP2:PCMT1:RAPGEF5:GGCT:ELMO1:AMPH:STX1A:NDUFA5:CUL1:DPP6:PTPRN2:TUSC3:STAU2:ANKRD46:RAD21:GRINA:PRUNE2:GABBR2:STXBP1:DNM1:ATP5C1:OPTN:PSAP:NELL1:MADD:FIBP:DDX10:OPCML:LMO3:C2CD5:NELL2:SYT1:RSRC2:TMED2:RAN:DCLK1:ATP6V1D:EIF2…
72	Curated_gene_sets	WP_FOCAL_ADHESION	188	43	5.11293e-05	0.00461229	FGR:THBS3:TNR:AKT3:ROCK2:COL5A2:ITGA9:CTNNB1:MYLK:ITGB5:TNK2:PIK3R1:TNXB:FYN:LAMA4:HGF:RELN:LAMB1:CAV2:BLK:PTK2:ITGA8:VCL:DOCK1:PARVA:BIRC2:ITGB7:FLT1:COL4A1:COL4A2:AKT1:PAK6:TLN2:MAP2K1:ERBB2:ITGA2B:ITGB3:PRKCA:ITGB4:PIP5K1C:ARHGAP35:PRKCG:MYL9
73	Curated_gene_sets	HOQUE_METHYLATED_IN_CANCER	54	18	5.64007e-05	0.00501812	PTGS2:FHIT:RBP1:QDPR:VCAN:CDX1:TFAP2A:GATA4:CDKN2A:PAX5:MGMT:WT1:CADM1:CDH13:BRCA1:GFAP:TIMP2:SEZ6L
74	Curated_gene_sets	KYNG_DNA_DAMAGE_BY_4NQO	32	13	5.91768e-05	0.00519396	FBLN2:WNT5A:ITGB5:SSR3:ADH6:PDGFRL:NET1:PCK2:IL16:ANKRD11:ADAMTS1:IFNGR2:POLR2F
75	Curated_gene_sets	BROWNE_HCMV_INFECTION_18HR_DN	161	38	6.69448e-05	0.00579742	THBS3:RBMS3:PLCD1:TRAK1:ACOX2:MYLK:GP9:SLC9A3:SEMA5A:CRHBP:VCAN:ALDH7A1:TNIP1:SGCD:DST:FYN:RPS6KA2:INSIG1:PNOC:RBPMS:PTPRD:ADAM12:IGF2:SLC22A18:TEAD1:CCDC85B:TENC1:YLPM1:OCA2:GREM1:ANXA2:LOXL1:FAH:CBFA2T3:ZFR2:TPM4:AXL:COL6A1
76	Curated_gene_sets	NABA_ECM_GLYCOPROTEINS	180	41	8.33099e-05	0.00711971	VWA1:RSPO1:THBS3:TNR:NID1:LTBP1:FBLN7:IGFBP5:SNED1:FBLN2:IGSF10:IGFBP7:SPARCL1:EGFLAM:EDIL3:FBN2:SLIT3:TNXB:EYS:LAMA4:SMOC2:VWDE:IGFBP1:RELN:LAMB1:LAMB4:RSPO2:SVEP1:SLIT1:TECTB:VWA2:DMBT1:SPON1:NELL1:MGP:NELL2:COCH:NID2:THSD4:ZP2:NTN1
77	Curated_gene_sets	NIKOLSKY_BREAST_CANCER_6P24_P22_AMPLICON	21	10	8.52365e-05	0.00718975	GFOD1:SIRT5:RANBP9:RNF182:CD83:CAP2:FAM8A1:KIF13A:KDM1B:RNF144B
78	Curated_gene_sets	MEISSNER_NPC_HCP_WITH_H3K4ME2	456	85	8.68479e-05	0.00723176	VWA1:AGBL4:TTC39A:SLC44A5:LGR6:SERTAD4:SLC35F3:ADCY3:MARCH4:LHFPL4:HRH1:FBLN2:PRICKLE2:RAB43:FGF12:PRDM8:PRKG2:PCDHAC1:SLIT3:NSD1:COL23A1:RNF144B:LMTK2:DPP6:VIPR2:PLEKHA2:ANK1:SLCO5A1:FZD6:SEMA4D:LMX1B:DNM1:OLFM1:CACNA1B:NET1:CCDC3:KIAA1217:GDF10:TLL2:CPXM2:PTPRE:TCERG1L:BRSK2:KCNJ8:PKP2:SMAGP:RASAL1:SRRM4:GLT1D1:SMAD9:DNAJC15:GRTP1:DLK1:OTUD7A:ANXA2:DAPK2:PDE8A:ALDH1A3:DOC2A:FA2H:ADAMTS18:IRF8:A…
79	Curated_gene_sets	ZHAN_MULTIPLE_MYELOMA_CD1_VS_CD2_DN	51	17	9.00972e-05	0.00740736	TLK1:OSBPL10:TBC1D1:STAP1:PRDM5:GM2A:RAPGEF5:PNOC:NEK6:SBF2:NAV2:DENND5B:TMTC2:CORO1C:STXBP6:PRKCA:FAM19A5
80	Curated_gene_sets	REACTOME_COLLAGEN_CHAIN_TRIMERIZATION	42	15	9.51139e-05	0.00762672	COL9A2:COL5A2:COL6A3:COL23A1:COL11A2:COL21A1:COL9A1:COL10A1:COL13A1:COL4A1:COL4A2:COL9A3:COL20A1:COL18A1:COL6A1
81	Curated_gene_sets	NABA_COLLAGENS	42	15	9.51139e-05	0.00762672	COL9A2:COL5A2:COL6A3:COL23A1:COL11A2:COL21A1:COL9A1:COL10A1:COL13A1:COL4A1:COL4A2:COL9A3:COL20A1:COL18A1:COL6A1
82	Curated_gene_sets	WANG_SMARCE1_TARGETS_UP	266	55	9.97972e-05	0.00790467	ROR1:DPYD:PTGFRN:PRRX1:CHI3L1:NID1:ANTXR1:PCYOX1:KLF7:IGFBP5:COL6A3:LRRFIP1:LMCD1:MYLK:ITGB5:TMEM108:PCDH7:PCDH10:MAP1B:RASGRF2:VCAN:EDIL3:MAN2A1:MCC:PCDHB2:ATXN1:PLAT:SULF1:FBXO32:GABBR2:GSN:STOM:PLXDC2:TLL2:PARVA:WT1:CADM1:TAGLN:KLRC1:MGP:LIMA1:DIP2B:CTDSP2:LUM:DCN:NID2:SIPA1L1:LPCAT2:ITGB3:TIMP2:SERPINB7:PLCB1:MYL9:ATP9A:TSHZ2
83	Curated_gene_sets	MIKKELSEN_IPS_WITH_HCP_H3K27ME3	97	26	0.000103043	0.00806343	GFI1:HOXD10:FGF12:PRDM8:SLC25A31:TMEM174:PCDHA2:PCDHA3:PCDHA4:PCDHA10:PCDHA11:PCDHA13:KCNIP1:TFAP2D:GRM8:KCNK9:PAPPA:SORCS3:IGF2:NPAS4:NTM:LRRK2:HOXC8:TBX5:ASIC2:CA10:NFIX:CACNG2
84	Curated_gene_sets	MEBARKI_HCC_PROGENITOR_WNT_UP	176	40	0.000106339	0.00816378	NAV1:DISC1:GNG4:ST6GAL2:COL5A2:KLF7:IGFBP5:PRICKLE2:CLSTN2:PPP2R2C:LEF1:VCAN:HAPLN1:ALDH7A1:ADAM19:PDLIM7:LFNG:CARD11:PDGFRL:LZTS1:CLIC3:CCDC3:NANOS1:ADAM12:PKP3:RARG:MDM1:LUM:DCN:CORO1C:STXBP6:BMF:SH3GL3:NDRG4:NXN:ITGB4:TPM4:MYADM:EYA2:ADRBK2
85	Curated_gene_sets	ZHOU_INFLAMMATORY_RESPONSE_FIMA_UP	439	82	0.000106839	0.00816378	MORN1:TP73:YRDC:MTF1:IGSF3:DCAF8:DCAF8:PTGS2:GNG4:CTNNA2:ZEB2:GALNT13:SGPP2:ITGA9:CYP8B1:WNT5A:CADPS:LINC00636:KIAA2018:DGKG:CC2D2A:FAM47E-STBD1:LEF1:FAM160A1:SORBS2:ELOVL7:HAPLN1:KLHL3:NRG2:NIPAL4:CD83:RNF144B:FSCN1:RAPGEF5:PRR15:COBL:MDFIC:ESCO2:NKAIN3:HNF4G:TPD52:ZHX2:DMRTA1:SVEP1:PAPPA:ITGA8:CYP2C9:TLL2:NFKB2:EBF3:AC104389.28:OR51B5:SPON1:NAV2:NOX4:ERC1:SRGAP1:HAL:TCTN1:RASAL1:TBX5:FGF9:MCF2L…
86	Curated_gene_sets	ONKEN_UVEAL_MELANOMA_UP	721	124	0.000108877	0.00822278	CLIC4:NRD1:WLS:MTX1:DCAF8:DCAF8:RABGAP1L:SOX13:CNIH4:OPN3:GREB1:ADCY3:ALK:PSME4:SEPT10:ZEB2:BAZ2B:RAPGEF4:FZD5:ARMC9:AGAP1:LRRFIP1:HDAC4:SEPT2:WWTR1:FAM193A:QDPR:PCDH7:TBC1D1:IGFBP7:SPARCL1:ANK2:GALNT7:SYNPO:HLA-G:HLA-B:C2:HLA-DMA:MYO6:REV3L:SGK1:AHI1:PCMT1:RPS6KA2:MAD1L1:TFPI2:TRRAP:CUX1:CTSB:LZTS1:CHD7:MRPS28:TPD52:ZBTB10:WWP1:RMDN1:CPNE3:PLEKHF2:STK3:ANKRD46:UBR5:EMC2:RAD21:MTSS1:PTK2:PTP4A3:G…
87	Curated_gene_sets	SENESE_HDAC1_AND_HDAC2_TARGETS_DN	212	46	0.000110783	0.00826187	ZNF362:EDN2:COL5A2:IGFBP5:TNS1:RBMS3:WNT5A:PRICKLE2:TMEM45A:MYLK:IGFBP7:ANXA10:HAPLN1:EDIL3:CXCL14:PPP2R2B:SYNPO:EBF1:TENM2:CAP2:LRP11:LAT2:INSIG1:PDGFRL:MTUS1:CLU:CELF2:CASC10:PLCE1:NANOS1:SYT12:TMEM135:TAGLN:PKP2:LUM:ITGBL1:ZNF219:NRXN3:RIN3:LOXL1:TK2:MGAT5B:TMEM200C:DTNA:TCF4:MYL9
88	Curated_gene_sets	MARTENS_BOUND_BY_PML_RARA_FUSION	420	79	0.000111939	0.00826187	NADK:AJAP1:ECE1:FGR:HIVEP3:SYT2:TMCC2:WDR26:LBR:HDAC4:PRKCD:RAB43:SH3BP2:SLC9A3:ANKRD33B:DCTN4:SQSTM1:SERPINB1:GFOD1:HIVEP2:RPS6KA2:LFNG:CUX1:TBXAS1:RNF122:PLEKHA2:CHD7:AKNA:NEK6:CELF2:PSAP:SH3PXD2A:CHST15:PTPRJ:NRXN2:NPAS4:ZBTB16:UBASH3B:WNT5B:CACNA1C:ARID2:MDM1:TESC:RSRC2:NCOR2:RASA3:LTB4R:ASB2:DAPK2:SMAD3:UACA:ZNF710:CRAMP1L:TK2:ST3GAL2:PLCG2:COTL1:IRF8:ANKRD11:WDR81:GAS7:PIGL:KSR1:RARA:TMEM10…
89	Curated_gene_sets	REACTOME_O_LINKED_GLYCOSYLATION	103	27	0.000115479	0.00834896	GALNT2:GALNT13:GALNT5:GALNT15:MUC4:ADAMTS3:GALNT7:SEMA5A:GALNT10:MUC12:MUC17:RN7SKP54:MUC6:MUC5B:SPON1:ADAMTS20:GALNT9:B3GALTL:THSD4:ADAMTSL3:B3GNT9:ST3GAL2:ADAMTS18:B4GALT6:ADAMTSL5:MUC16:ADAMTS1:LARGE
90	Curated_gene_sets	GRYDER_PAX3FOXO1_ENHANCERS_KO_DOWN	414	78	0.00011667	0.00834896	ARID1A:KCNN3:PIGC:NAV1:RRP15:GALNT2:KCNS3:HS1BP3:ALK:MSH6:TCF7L1:SATB2:NRP2:SUMF1:LRRFIP2:PHLDB2:XRN1:APBB2:LIMCH1:WDFY3:ANK2:PGRMC2:SPOCK3:SLC38A9:MSH3:MCC:H2AFY:JARID2:ASCC3:QKI:SDK1:FSCN1:ELMO1:AUTS2:PTPN12:VIPR2:STC1:EYA1:SMARCA2:PRUNE2:DAPK1:SFMBT2:CELF2:CCDC3:SGMS1:PRKG1:PALD1:PLCE1:SORCS1:FAM160B1:FGFR2:CHST15:SBF2:NAV2:NELL1:EXT2:WNK1:TSPAN9:SPATS2:CTDSP2:NOS1:COL4A1:COL4A2:DAAM1:GPHN:SIP…
91	Curated_gene_sets	CHEN_METABOLIC_SYNDROM_NETWORK	1127	182	0.000116975	0.00834896	AJAP1:ZBTB48:PLEKHM2:LDLRAP1:PGM1:CACHD1:WLS:CTTNBP2NL:SNX27:CREG1:RGL1:PLA2G4A:ENAH:NID1:OPN3:DCDC2C:FKBP1B:NLRC4:LTBP1:ANTXR1:FBLN7:ZRANB3:CCDC148:TANC1:ZNF385B:COL5A2:CDK15:ABI2:NRP2:FZD5:PRKAG3:COL6A3:PPARG:FBLN2:RBMS3:PRKCD:FOXP1:FILIP1L:CD86:CHCHD6:SLCO2A1:MFI2:SH3BP2:BST1:TBC1D1:RHOH:ADAMTS3:CDS1:SEMA5A:ANKRD33B:HEXB:VCAN:RASA1:FSTL4:CXCL14:ECSCR:SYNPO:TNIP1:ADAM19:SPDL1:UBTD2:HK3:SERPINB6…
92	Curated_gene_sets	LEIN_CEREBELLUM_MARKERS	77	22	0.000124837	0.00881319	ICMT:NEK2:SLC9A3:MCC:GABRA6:RNF182:GPR63:GSAP:CHD7:KCNT1:GDF10:AFAP1L2:PKP3:ERC1:SYNE2:IL16:CA7:NTN1:LHX1:PEPD:COL18A1:SLC25A18
93	Curated_gene_sets	YOSHIMURA_MAPK8_TARGETS_UP	1179	189	0.000130347	0.00910325	PRKCZ:PLEKHM2:FGR:EDN2:PTGER3:PTGFR:GFI1:GJA5:KCNN3:BCAN:CREG1:TNR:RGS8:SYT2:SOX13:MSH2:WDPCP:CD8A:EIF2AK3:NEURL3:GALNT5:KCNH7:SCN9A:RAPGEF4:SATB2:CRYGD:MAP2:ERBB4:BOK:RAD18:MAPKAPK3:ACOX2:LSAMP:KALRN:CHCHD6:TF:GP5:SULT1E1:SMR3A:FGF5:PRKG2:CDS1:ADH1C:CASP6:CTNND2:PRLR:PDE4D:MAP1B:CRHBP:CXCL14:HTR4:SYNPO:GABRA6:ATXN1:TNXB:HLA-DMA:SYNGAP1:MAPK14:KCNK5:COL9A1:RTN4IP1:HIVEP2:GRM1:OPRM1:HOXA4:IGFBP1:S…
94	Curated_gene_sets	WP_SILDENAFIL_TREATMENT	22	10	0.000138828	0.00959241	PDE4B:AKT3:PPARGC1A:PDE4D:PARK2:PRKG1:NOS1:AKT1:NOS2:PDE4A
95	Curated_gene_sets	MULLIGHAN_MLL_SIGNATURE_2_DN	251	52	0.000144498	0.00982298	LUZP1:CLIC4:EDN2:MPL:DNTTIP2:KIFAP3:CHI3L1:LRRN2:PTPN14:VGLL4:UBE2E1:MUC4:RHOH:STAP1:NPM1:RPS6KA2:FSCN1:ELMO1:HGF:ABCB1:RBPMS:ST18:TPD52:RUNX1T1:UBR5:BAALC:PTP4A3:DAPK1:STOM:RALGDS:NET1:ADK:HSD17B12:MYRF:GNPTAB:POLE:MCF2L:PRKCH:HIF1A:SIPA1L1:MYO5C:NEDD4:LOXL1:FAH:ATP2A3:SEPT9:YES1:B4GALT6:TNPO2:PPP1R16B:CDH4:APP
96	Curated_gene_sets	BERTUCCI_MEDULLARY_VS_DUCTAL_BREAST_CANCER_DN	155	36	0.000145189	0.00982298	EDN2:CACHD1:LGR6:PTPN14:NCOA1:RTN4:LIMS2:ERBB4:LMCD1:ZNF385D:MYLK:ITGB5:SEMA5A:CTNND2:SLIT3:RP11-3N2.13:ZNF727:PTPRZ1:DLC1:FBXO32:MTSS1:RABGAP1:SH3PXD2A:ADAM12:PARVA:ANO1:PICALM:CADM1:TAGLN:NAV3:SAV1:DAAM1:TLN2:UACA:PPP1R1B:MYL9:SNX21
97	Curated_gene_sets	GAVIN_FOXP3_TARGETS_CLUSTER_P7	83	23	0.000147278	0.00986158	WLS:GBP2:LRRC8D:SELP:RABGAP1L:LYST:QPCT:DST:ABCB1:HIPK2:TTC39B:ITIH5:MAP6:ARHGAP20:FGD6:MYO1E:NTRK3:APOBR:SPECC1:LDLRAD4:PARD6G:APP:MTMR3
98	Curated_gene_sets	SMID_BREAST_CANCER_BASAL_DN	631	110	0.000152859	0.0101308	TTC39A:PTGER3:AK5:ANXA9:SLC19A2:CAPN9:EFCAB2:GREB1:KIF5C:STK39:ERBB4:SNED1:ZNF385D:GPD1L:TRAK1:CLEC3B:CACNA2D3:ACOX2:CLSTN2:QDPR:UGDH:RHOH:APBB2:CDS1:SPARCL1:CLGN:LRBA:GALNT7:PRLR:MRPS30:NR2F1:CXCL14:SIL1:PCDHA9:GALNT10:SLIT3:F13A1:MYO6:DDO:BLVRA:HGF:ABCB1:TFPI2:LEP:CNTNAP2:PTPRN2:MTUS1:PSD3:PLAT:KRT8P3:STAU2:WWP1:PLEKHF2:SYBU:FBP1:SVEP1:ASTN2:NEBL:CXCL12:PBLD:KCNMA1:PAX2:ADRA2A:MUC6:SLC22A18:NUC…
99	Curated_gene_sets	MANNE_COVID19_NONICU_VS_HEALTHY_DONOR_PLATELETS_DN	179	40	0.000156328	0.0102561	WLS:DPYD:ENAH:GRHL1:TNS1:FGD5:ERC2:CPNE4:P2RY12:LDB2:BANK1:ANKRD33B:CTNND2:ANKRD55:SYNPO:CDYL:DCDC2:SDK1:TFPI2:GPIHBP1:PTPRD:PAPPA:FAM107B:ZNF438:CXCL12:ADAM12:IGF2:LIG4:COL4A1:COL4A2:CEP128:DLK1:KIAA1024:WWOX:IRF8:RPH3AL:PPM1E:SIGLEC12:PHACTR3:MAP3K7CL
100	Curated_gene_sets	ZHENG_BOUND_BY_FOXP3	464	85	0.000160064	0.0103962	PDE4B:PTGER3:FAM46C:SELP:RABGAP1L:RGS13:RRM2:ASXL2:THADA:ZAP70:TLK1:SUMF1:VGLL4:ANKRD28:TBC1D5:CADPS:FOXP1:KIAA2018:ZBTB20:MBNL1:BCL6:XXYLT1:CC2D2A:RHOH:CORIN:LEF1:FYB:ANKRD55:CWC27:RAPGEF6:ADAM19:HK3:EXOC2:JARID2:ABT1:TRIM27:PRDM1:FYN:HIVEP2:ZC3H12D:OPRM1:NOX3:AHR:ELMO1:AMPH:MDFIC:INTS9:SDR16C5:CHD7:PDE7A:TTC39B:MAMDC2:CELF2:FAM107B:NRP1:CREM:SGMS1:TRIM5:RRAS2:DTX4:MS4A6A:SIK3:UBASH3B:ST8SIA1:C2…
101	Curated_gene_sets	REACTOME_COLLAGEN_BIOSYNTHESIS_AND_MODIFYING_ENZYMES	63	19	0.000162516	0.0104509	COL9A2:COL5A2:COL6A3:PLOD2:ADAMTS3:COL23A1:COL11A2:COL21A1:COL9A1:COL10A1:COL13A1:TLL2:COL4A1:COL4A2:PPIB:COL9A3:COL20A1:COL18A1:COL6A1
102	Curated_gene_sets	DUTERTRE_ESTRADIOL_RESPONSE_24HR_DN	471	86	0.000164686	0.0104866	ID3:RGL1:IRF6:SERTAD4:LYST:ROCK2:STON1:TCF7L1:STAM2:BAZ2B:FAM171B:MAP2:BOK:LMCD1:PPARG:CD47:PHLDB2:SLCO2A1:XRN1:WWTR1:SCHIP1:LIMCH1:CDS1:ABCG2:PDLIM5:CTNND2:FBN2:SYNPO:GALNT10:ZNF354A:SQSTM1:SERPINB1:TFAP2A:RNF144B:MYO6:EPB41L2:HIVEP2:QKI:LFNG:AHR:MACC1:GSAP:PTPN12:HBP1:LAMB1:PSD3:PLEKHF2:FBXO32:CDKN2A:DMRTA1:GABBR2:SFMBT2:OPTN:KIAA1217:ANK3:TRIM5:TAGLN:TMEM45B:LIMA1:DCLK1:DNAJC15:PCDH9:LMO7:SAMD…
103	Curated_gene_sets	MIKKELSEN_NPC_HCP_WITH_H3K4ME3_AND_H3K27ME3	204	44	0.000177923	0.011214	PTCHD2:PTGER3:AK5:PTGFRN:NMNAT2:SH3RF3:KIF5C:HOXD13:IGF2BP2:GABRA4:FGF5:CDS1:ANKRD33B:EGFLAM:TFAP2A:SMOC2:ELFN1:BAIAP2L1:RELN:PTPRN2:CSMD1:NEFM:RSPO2:CXCL12:KCNMA1:CDHR1:TSPAN18:OAF:KCNH3:HOXC4:HOXC4:HRK:FGF9:FLT1:GPC5:COCH:MAP3K9:BMF:AP3B2:ST8SIA2:SYNM:SPIRE2:ADORA2B:PTH2:CDH22
104	Curated_gene_sets	CREIGHTON_ENDOCRINE_THERAPY_RESISTANCE_3	654	113	0.000179563	0.011214	PGM1:SLC44A5:FAM73A:PTGFRN:UAP1:SCYL3:RGL1:LBR:FAM110C:KCNS3:PLEKHH2:EIF2AK3:MFSD9:STAM2:GALNT5:STK39:ORMDL1:FZD5:SGPP2:WDFY1:AGAP1:PPARG:OSBPL10:TRAK1:LIMD1:SLCO2A1:IGF2BP2:HS3ST1:FAM114A1:LIMCH1:CDS1:PDLIM5:TSPAN5:CLGN:GALNT7:MTMR12:NR2F1:FBN2:H2AFY:SERPINB1:TRIM31:DCBLD1:LRP11:SYNJ2:AHR:PRR15:ELMO1:AUTS2:POR:GSAP:CLDN12:LMTK2:BAIAP2L1:CTTNBP2:PTPRZ1:INSIG1:PTPRN2:MTUS1:HEY1:SPAG1:BAALC:FAM83A:…
105	Curated_gene_sets	LU_AGING_BRAIN_UP	241	50	0.000184961	0.0114412	CLIC4:GREB1:LTBP1:MAL:SEPT10:ZEB2:BAZ2B:RAPGEF4:RAMP1:ZBTB20:AMOTL2:PLOD2:WWTR1:PDLIM5:VCAN:FYN:EPM2A:QKI:CAV2:EYA1:CPNE3:STK3:UBR5:ZHX2:MTSS1:GNE:GSN:STOM:NEBL:HNRNPH3:FGFR2:PARVA:SPON1:BBOX1:GAB2:PICALM:WNK1:PLXNC1:GPC5:HIF1A:KLC1:RP11-73M18.2:IQGAP1:IQCK:GPRC5B:ZNF423:RBL2:GFAP:YES1:BMP7:ABCG1
106	Curated_gene_sets	LEE_NEURAL_CREST_STEM_CELL_UP	134	32	0.000192892	0.0115766	LDLRAP1:ROR1:DPYD:NHLH2:NFASC:NRXN1:ZEB2:NRP2:IGFBP5:PCBP4:MITF:TAGLN3:GAP43:RBP1:IGFBP7:HAPLN1:NR2F1:SGCD:TFAP2A:KCNK5:LAMB1:DLC1:LZTS1:NEFM:ST18:RUNX1T1:GSN:SORBS1:SLIT1:LUM:DCN:TMEM204
107	Curated_gene_sets	VECCHI_GASTRIC_CANCER_ADVANCED_VS_EARLY_UP	163	37	0.000194179	0.0115766	PRRX1:AKT3:ANTXR1:COL5A2:TMEM45A:PLOD2:WWTR1:GNB4:BCL6:UBE2QL1:VCAN:NREP:GFPT2:COL10A1:QKI:AUTS2:CAV2:SULF1:HEY1:FBXO32:SFMBT2:PLXDC2:PLAU:ADAM12:NOX4:NTM:MGP:ITGBL1:COL4A1:NID2:HDGFRP3:ZNF423:NXN:RAB31:AXL:TIAM1:FAM19A5
108	Curated_gene_sets	MIYAGAWA_TARGETS_OF_EWSR1_ETS_FUSIONS_DN	211	45	0.00019814	0.0115766	AK5:CREG1:PRRX1:CHI3L1:LTBP1:EHBP1:GALNT5:FAM171B:MAP2:LMCD1:RBMS3:PRICKLE2:VGLL3:FILIP1L:PLOD2:TSPAN5:SEMA5A:VCAN:RGMB:NREP:ADAM19:GFPT2:PRDM1:EYA4:RPS6KA2:STC1:BAALC:ABHD17B:NRP1:PLAU:ADAM12:MICAL2:FIBIN:LUM:KCTD4:GPR180:NID2:SYNM:ALDH1A3:B3GNT9:NUDT7:UNK:NEDD4L:SERPINB7:SNX21
109	Curated_gene_sets	BERNARD_PPAPDC1B_TARGETS_DN	54	17	0.000199256	0.0115766	GSTM4:NAV1:KIF5C:IGFBP5:HDAC4:MAPKAPK3:PTPRG:SH3BP2:PRLR:KCNK5:MACC1:STC1:FBXO32:GLDC:PLCE1:FGFR2:RARA
110	Curated_gene_sets	PID_TXA2PATHWAY	54	17	0.000199256	0.0115766	PRKCZ:FGR:LCK:PRKCD:MAPK14:FYN:BLK:DNM1:PTGDR:PRKCH:AKT1:PRKCA:YES1:ICAM1:PRKCG:ADRBK2:MAPK11
111	Curated_gene_sets	FOROUTAN_PRODRANK_TGFB_EMT_UP	181	40	0.000200525	0.0115766	AKT3:KLF7:IGFBP5:TNS1:LMCD1:HRH1:WNT5A:SLCO2A1:FAM114A1:APBB2:IGFBP7:VCAN:NREP:GALNT10:ADAM19:SPDL1:PDLIM7:GFPT2:JARID2:RUNX2:TFPI2:DLC1:STC1:KCNMA1:ADAM12:MICAL2:CD59:TAGLN:WNT5B:COL4A1:COL4A2:DAAM1:GREM1:ITGB3:TIMP2:CDH2:TCF4:TPM4:MYL9:PMEPA1
112	Curated_gene_sets	WP_ARRHYTHMOGENIC_RIGHT_VENTRICULAR_CARDIOMYOPATHY	69	20	0.00020141	0.0115766	CTNNA2:TCF7L1:ITGA9:CTNNB1:CACNA2D3:ITGB5:LEF1:SGCD:ITGA8:CACNA1C:PKP2:ITGB7:SGCG:ITGA2B:ITGB3:ITGB4:CDH2:CACNG8:CACNG6:CACNG2
113	Curated_gene_sets	KEGG_ARRHYTHMOGENIC_RIGHT_VENTRICULAR_CARDIOMYOPATHY_ARVC	69	20	0.00020141	0.0115766	CTNNA2:TCF7L1:ITGA9:CTNNB1:CACNA2D3:ITGB5:LEF1:SGCD:ITGA8:CACNA1C:PKP2:ITGB7:SGCG:ITGA2B:ITGB3:ITGB4:CDH2:CACNG8:CACNG6:CACNG2
114	Curated_gene_sets	REACTOME_ASSEMBLY_OF_COLLAGEN_FIBRILS_AND_OTHER_MULTIMERIC_STRUCTURES	59	18	0.000203965	0.0116206	COL9A2:LOXL3:COL5A2:COL6A3:COL11A2:DST:COL9A1:COL10A1:CTSB:TLL2:CD151:COL4A1:COL4A2:LOXL1:ITGB4:COL9A3:COL18A1:COL6A1
115	Curated_gene_sets	FOROUTAN_INTEGRATED_TGFB_EMT_UP	118	29	0.000223645	0.0125308	COL5A2:IGFBP5:TNS1:COL6A3:LMCD1:WNT5A:VGLL3:IGFBP7:VCAN:NREP:GALNT10:ADAM19:PDLIM7:GFPT2:DLC1:STC1:KCNMA1:TAGLN:WNT5B:LUM:COL4A1:COL4A2:GREM1:ITGB3:TIMP2:CDH2:TCF4:MYL9:PMEPA1
116	Curated_gene_sets	BLALOCK_ALZHEIMERS_DISEASE_UP	1508	233	0.000223799	0.0125308	NADK:SPSB1:PRDM2:ECE1:ID3:LDLRAP1:ARID1A:MTF1:RRAGC:GBP2:GSTM4:CSDE1:KCNN3:BCAN:PRRX1:SOX13:NFASC:NUCKS1:ENAH:LYST:NID1:AKT3:HS1BP3:ADCY3:PSME4:TCF7L1:POLR1B:R3HDM1:BAZ2B:DHRS9:CFLAR:NRP2:KLF7:ERBB4:IGFBP5:COL6A3:LRRFIP1:RAMP1:ASB1:HDAC4:SNED1:SEPT2:VGLL4:TBC1D5:RBMS3:LRRFIP2:LIMD1:SMARCC1:USP4:TEX264:MITF:ZBTB20:CD86:MYLK:ITGB5:ZNF148:TF:AMOTL2:PLOD2:WWTR1:DGKG:BCL6:FAM193A:SH3BP2:REST:TSPAN5:LE…
117	Curated_gene_sets	WP_SPINAL_CORD_INJURY	113	28	0.000245777	0.0135753	BCAN:SELP:PTGS2:ROCK2:RTN4:CD47:GAP43:VCAN:SLIT3:ROS1:PTPRZ1:LEP:GRIN1:SLIT1:NOX4:NR4A1:CDK2:NOS1:COL4A1:LTB4R:NTN1:NOS2:GFAP:PRKCA:MBP:ICAM1:NCAN:KLK8
118	Curated_gene_sets	ROVERSI_GLIOMA_COPY_NUMBER_DN	50	16	0.000246634	0.0135753	LRP1B:ZEB2:FHL5:GPR63:CDKN2A:SFMBT2:ITIH5:ATP5C1:KCNMA1:ADAM12:DOCK1:PTPRE:ANKRD10:TUBGCP3:GNAO1:FAM19A5
119	Curated_gene_sets	MIKKELSEN_IPS_ICP_WITH_H3K4ME3_AND_H327ME3	119	29	0.000261002	0.0141268	TNFRSF8:EDN2:RGS8:LOXL3:NCKAP5:ROBO2:PCDHGA1:LAMA4:PTN:PHYHIP:MAMDC2:ADARB2:ITIH5:CALY:OSBPL5:FIBIN:YPEL4:TMEM45B:OPCML:SCNN1A:PTPRR:KLHL1:TMEM63C:CCDC64B:HOXB13:ADAM33:FOXS1:SLC2A10:MIOX
120	Curated_gene_sets	HOELZEL_NF1_TARGETS_UP	119	29	0.000261002	0.0141268	RGS13:NAV1:NRXN1:SCN9A:OSBPL6:MAP2:GAP43:CLSTN2:PCDH7:FAM114A1:SPARCL1:PDLIM5:ANK2:ATXN1:OSBPL3:GSAP:HGF:RELN:SLC18A1:HEY1:PAPPA:TSPAN18:EPS8:MGAT4C:DCLK1:THSD4:RAB31:B4GALT6:GNAS
121	Curated_gene_sets	BLALOCK_ALZHEIMERS_DISEASE_DN	1116	178	0.000264568	0.0141414	MECR:MRPS15:PGM1:PDE4B:AK5:MLLT11:RUSC1:BCAN:UAP1:DCAF6:KIFAP3:CACYBP:ASTN1:NMNAT2:RGS7:ROCK2:PUM2:FKBP1B:QPCT:LRPPRC:MSH2:NRXN1:RTN4:CTNNA2:R3HDM1:LRP1B:KIF5C:SCN1A:TLK1:SLC25A12:RAPGEF4:COL5A2:CHL1:LSM3:OSBPL10:FHIT:TAGLN3:GAP43:NDUFB4:KALRN:SCHIP1:LDB2:PCDH7:POLR2B:SEC31A:ABCE1:GPM6A:SORBS2:ADCY2:CDH18:ZFR:NNT:NDUFS4:PDE4D:HEXB:CCNH:PCSK1:NREP:H2AFY:CXCL14:PFDN1:PCDHA9:RNF14:PPP2R2B:KCNIP1:FAR…
122	Curated_gene_sets	RUIZ_TNC_TARGETS_UP	142	33	0.000265627	0.0141414	GBP2:WDR26:STON1:BAZ2B:COL5A2:VGLL4:ZBTB20:BCL6:LDB2:IGFBP7:LEF1:SEMA5A:NR2F1:HBP1:TBXAS1:TNKS:CSGALNACT1:CLU:EYA1:HEY1:GSN:CXCL12:PSAP:CHST15:PHF21A:C1RL:CTDSP2:RCBTB1:ARHGAP28:FCGRT:SLC2A10:ATP9A:COL18A1
123	Curated_gene_sets	WP_HIPPO_SIGNALING_REGULATION_PATHWAYS	97	25	0.000270544	0.014286	PRKCZ:TCF7L1:PRKAG3:CTNNB1:PRKCD:LEF1:CDH18:CDH12:PRKAR1B:STK3:FGFR2:TEAD1:FLT1:PRKCH:SMAD3:CDH8:CDH13:CDH15:PRKCA:CDH2:PRKCG:PLCB1:CDH22:GNAS:CDH4
124	Curated_gene_sets	WP_SPLICING_FACTOR_NOVA_REGULATED_SYNAPTIC_PROTEINS	41	14	0.000278731	0.0145997	PRKCZ:DAB1:CHL1:EPB41L2:CAV2:GABBR2:GRIN1:ANK3:KCNMA1:CADM1:GPHN:TERF2IP:CDH2:KCNQ2
125	Curated_gene_sets	REACTOME_DISEASES_OF_GLYCOSYLATION	131	31	0.000286239	0.0148349	PGM1:BCAN:MUC4:ADAMTS3:SEMA5A:HEXB:VCAN:NOTCH4:LFNG:MUC12:MUC17:RN7SKP54:GNE:NOTCH1:MUC6:MUC5B:SPON1:EXT2:ADAMTS20:LUM:DCN:B3GALTL:GPC5:THSD4:ADAMTSL3:ADAMTS18:MPDU1:ADAMTSL5:MUC16:NCAN:ADAMTS1:LARGE
126	Curated_gene_sets	DELYS_THYROID_CANCER_UP	419	77	0.00028779	0.0148349	ECE1:MAP3K6:ROR1:GBP2:DPYD:IGSF3:MLLT11:CHI3L1:QPCT:TGFA:COL5A2:NRP2:MAP2:RAMP1:ITGA9:PLCD1:MAPKAPK3:PTPRG:ITGB5:IGF2BP2:PCDH7:VCAN:C2:KCNK5:TREM1:MYO6:PRDM1:FYN:COL10A1:RPS6KA2:GGCT:CTSB:TUSC3:MTUS1:PSD3:PTP4A3:GABBR2:COL13A1:PLAU:ADK:SLIT1:ADAM12:PTPRE:CD151:SLC22A18:APLNR:DTX4:MS4A6A:PC:OPCML:EPS8:NELL2:ITGB7:PLXNC1:CORO1C:DOCK9:ATP11A:SAMD4A:GABRG3:ANXA2:DAPK2:SNX1:ALDH1A3:GPRC5B:ABR:MYO1D:GR…
127	Curated_gene_sets	ZHOU_INFLAMMATORY_RESPONSE_LIVE_UP	393	73	0.00029476	0.0150746	SPSB1:RSPO1:YRDC:MTF1:DCAF8:DCAF8:PTGS2:ZEB2:CFLAR:TNS1:SGPP2:HDAC4:PRKCD:WNT5A:CADPS:KIAA2018:MBNL1:FAM47E-STBD1:GPM6A:ELOVL7:MAP1B:HAPLN1:KLHL3:TNIP1:NIPAL4:CANX:SQSTM1:CD83:ATXN1:RNF144B:NOTCH4:EYA4:FSCN1:COBL:HGF:PSD3:ESCO2:SNTG1:HEY1:TPD52:DMRTA1:CYP2C9:LCOR:NFKB2:CALY:SPON1:OAF:LMO3:SRGAP1:NCOR2:PCDH9:COL4A1:TTC9:IQCH:AGBL1:IRF8:CDH15:KDM6B:CCL15:WNK4:NEDD4L:EVI5L:ICAM1:ICAM4:SYDE1:TPM4:NCA…
128	Curated_gene_sets	ROY_WOUND_BLOOD_VESSEL_UP	46	15	0.000303465	0.0153481	GALNT2:FKBP1B:COL5A2:SLCO2A1:VCAN:STC1:SULF1:STOM:NRP1:PLAU:KCNJ8:LUM:COL4A1:NID2:RAB31
129	Curated_gene_sets	RIGGI_EWING_SARCOMA_PROGENITOR_UP	400	74	0.000304836	0.0153481	HIVEP3:DAB1:CACHD1:PTGER3:OLFM3:IGSF3:PTGS2:OPN3:ALK:TGFA:TCF7L1:CSRNP3:TMEFF2:IGFBP5:RAMP1:SMARCC1:SYNPR:KALRN:CLSTN2:SH3TC1:LDB2:PCDH7:CORIN:ADAMTS3:CDS1:LEF1:MARCH1:PIK3R1:NR2F1:ALDH7A1:JARID2:COL21A1:NT5DC1:RELN:CTTNBP2:MYOM2:TRIM35:PNOC:SLCO5A1:FREM1:CCDC171:MAMDC2:DAPK1:PTGDS:CLIC3:FAM107B:PLXDC2:KIAA1217:CREM:WT1:DLG2:ZBTB16:OPCML:LMO3:NELL2:TRHDE:NOS1:TMEM132B:WDFY2:PCDH9:BCL11B:SORD:SH3G…
130	Curated_gene_sets	BOYLAN_MULTIPLE_MYELOMA_C_DN	51	16	0.000318193	0.0158974	ENAH:TANC1:KLF7:PLOD2:SMR3A:SERPINB1:ATXN1:KIF13A:ABCB1:ZBTB10:FZD6:SFMBT2:TRIM5:IRS2:BCL11B:B4GALT6
131	Curated_gene_sets	REACTOME_CA2_PATHWAY	61	18	0.000323542	0.0160412	GNG4:TCF7L1:FZD5:CTNNB1:WNT5A:GNB4:PDE6B:PRKG2:LEF1:FZD6:PRKG1:TNRC6A:GNAO1:PRKCA:TNRC6C:NFATC1:GNG7:PLCB1
132	Curated_gene_sets	LI_CISPLATIN_RESISTANCE_UP	24	10	0.000332484	0.0163597	ZBTB20:HAPLN1:VWDE:TFPI2:SMARCA2:CCDC171:NEBL:ANO3:UACA:CDH2
133	Curated_gene_sets	SENESE_HDAC2_TARGETS_DN	115	28	0.000335623	0.01639	ZNF362:EDN2:GSTM4:GALNT2:COL5A2:WNT5A:ZBTB20:IGFBP7:STOX2:CXCL14:PPP2R2B:CAP2:LRP11:INSIG1:CLU:PLCE1:NANOS1:LSP1:TAGLN:PKP2:LUM:NRXN3:LOXL1:TMEM200C:DTNA:CTXN1:FOXS1:MYL9
134	Curated_gene_sets	VERHAAK_AML_WITH_NPM1_MUTATED_DN	229	47	0.000366565	0.0176358	MPL:PDE4B:IFI44L:CHI3L1:ADCY3:ZAP70:RAMP1:LTF:PROM1:IGFBP7:STAP1:BANK1:RPS6KA2:HGF:ABCB1:CLDN15:MDFIC:CSGALNACT1:RBPMS:ST18:RUNX1T1:BAALC:FZD6:ZHX2:GSN:OPTN:SPON1:MS4A3:NRXN2:CHKA:ARHGEF12:EPS8:SMAGP:POLE:DLK1:MEG3:NEDD4:TMEM204:LDLRAD4:B4GALT6:PALM:GNG7:ICAM4:PPP1R16B:ATP9A:APP:ERG
135	Curated_gene_sets	YAUCH_HEDGEHOG_SIGNALING_PARACRINE_DN	229	47	0.000366565	0.0176358	PRDM16:ZSWIM5:TNR:SYT2:SMYD3:OSBPL6:ARPP21:SPATA16:GABRB1:PCDH10:HAPLN1:NRSN1:DDO:NMBR:NXPH1:SEMA3E:ASB15:KCNH2:MYOM2:SNTG1:EYA1:KCNK9:PAPPA:CACNA1B:GPR123:TRIM5:NAV2:PTPRJ:MYF5:MYBPC1:FOXN4:CUX2:PCDH9:ZIC5:NPAS3:HIF1A:CEP128:DLK1:IL16:IKZF3:PRKCA:NCAN:INSM1:NCAM2:GRIK1:CABP7:TEX33
136	Curated_gene_sets	MCLACHLAN_DENTAL_CARIES_DN	72	20	0.000375745	0.0178303	LTBP1:NRXN1:KIF5C:GAP43:SPOCK3:GPM6A:SORBS2:CDH12:MAGI2:DPP6:NEBL:ANK3:PDZD8:SPON1:ST8SIA1:SYT1:PCDH9:ZNF423:ATP9A:TIAM1
137	Curated_gene_sets	BROWNE_HCMV_INFECTION_12HR_DN	88	23	0.000376096	0.0178303	RABGAP1L:AKT3:TRAK1:LDB2:FGF5:TSPAN5:NREP:SERPINB1:ATXN1:FYN:DLC1:RUNX1T1:UBR5:GABBR2:CXCL12:HNRNPH3:PLCE1:IGF2:PTPRR:TBX5:SIPA1L1:ZNF516:ZMYND8
138	Curated_gene_sets	SMID_BREAST_CANCER_NORMAL_LIKE_UP	423	77	0.000387453	0.0182356	TNFRSF1B:ID3:LCK:CHI3L1:CR2:NRXN1:CD8A:ZAP70:CHL1:CLEC3B:ZBTB20:MYLK:TF:LAMP3:STAP1:SPARCL1:BANK1:LEF1:ANK2:FYB:PIK3R1:SLIT3:F13A1:DST:FYN:LAMA4:HIVEP2:SKAP2:HOXA7:AOAH:ELMO1:HGF:ABCB1:RELN:PTN:CSGALNACT1:LZTS1:CLU:PNOC:RUNX1T1:BAALC:PAX5:SVEP1:PTGDS:ITIH5:CELF2:CXCL12:SORBS1:BBOX1:APLNR:MS4A6A:NRXN2:CTSW:ROBO3:ITGB7:DCN:TESC:F10:BCL11B:DLK1:SNX1:SYNM:ST3GAL2:COTL1:IRF8:DOC2B:ATP2A3:ACAP1:CCL14:C…
139	Curated_gene_sets	REACTOME_DEVELOPMENTAL_BIOLOGY	1039	166	0.000390516	0.0182475	EPHA8:COL9A2:DAB1:GFI1:RPTN:LOR:SEMA4A:MPZ:NFASC:ENAH:WNT3A:AKT3:ROCK2:NCOA1:PSME4:CTNNA2:PKP4:SCN1A:SCN9A:COL5A2:NRP2:COL6A3:CHL1:PPARG:ITGA9:CTNNB1:FOXP1:ROBO2:GAP43:KALRN:WWTR1:PPARGC1A:POLR2B:EPHA5:SCD5:LEF1:ANK2:SEMA5A:PIK3R1:RASA1:RGMB:EBF1:SLIT3:PDLIM7:MAML1:RANBP9:CAP2:HIST1H3A:HIST1H3B:HIST1H3C:HIST1H3D:HIST1H3E:HIST1H3F:HIST1H3G:HIST1H3H:HIST1H3I:HIST1H3J:MAPK14:COL9A1:FYN:RPS6KA2:FAM12…
140	Curated_gene_sets	SCHLESINGER_METHYLATED_DE_NOVO_IN_CANCER	83	22	0.000404193	0.0187517	TP73:PAX7:GATA4:DLC1:PAX5:CXCL12:PRKG1:SLIT1:WT1:KLHL35:CYP27B1:HRK:PPP1R13B:CDH13:ASIC2:RARA:HOXB13:NPTX1:DSC3:GNAS:CDH4:TBX1
141	Curated_gene_sets	MARTINEZ_TP53_TARGETS_UP	565	98	0.000408787	0.0188303	NADK:PTGFR:GBP2:RPTN:MTX1:PTGS2:TNNI1:TMCC2:PTPN14:LTBP1:QPCT:PSME4:RTN4:MAP2:CHRND:FBLN2:ITGA9:PTPRG:TMEM45A:TF:ESYT3:KLB:EPHA5:PDLIM5:ADH1C:CASP6:ZFR:NDUFS4:MAP1B:ZBED3:CXCL14:RNF14:DCTN4:PTTG1:TMED9:LTC4S:SERPINB1:RANBP9:HLA-B:AMD1:SMOC2:PRKAR1B:BRAT1:FSCN1:AHR:TFPI2:PILRA:CLDN15:CUX1:HBP1:CAV2:PTPRZ1:AGK:ABCB8:RAD21:SPIN1:STOM:RABGAP1:RXRA:PFKFB3:ITIH5:CELF2:FAM107B:CXCL12:PSAP:SORBS1:FGFR2:I…
142	Curated_gene_sets	ZHU_CMV_ALL_DN	111	27	0.000431764	0.0197486	COL5A2:IGFBP5:XPC:USP4:MITF:MYLK:SULT1E1:CRHBP:VCAN:SERPINB6:TFAP2A:MAPK14:LAMA4:HIVEP2:AHR:RALGDS:CXCL12:ADRA2A:CD151:IGF2:TAGLN:SGCG:ERCC5:ANP32A:AARS:TPM4:TNNI3
143	Curated_gene_sets	WP_PROSTAGLANDIN_AND_LEUKOTRIENE_METABOLISM_IN_SENESCENCE	29	11	0.000445633	0.0202405	PTGER3:PTGS2:PLA2G4A:ADCY3:IGFBP5:LTC4S:TBXAS1:PTGDS:PLCB1:GNAS:MAPK11
144	Curated_gene_sets	HOLLERN_EMT_BREAST_TUMOR_UP	123	29	0.000471781	0.0212793	PRRX1:LOXL3:CHRNA1:NRP2:GNB4:APBB2:NR2F1:LTC4S:F13A1:EPB41L2:LAMB1:PLAT:DNM1:OLFM1:CSGALNACT2:TSPAN4:LSP1:WNK1:LRP1:DCN:LOXL1:B3GNT9:ST3GAL2:CDH13:CCL15:TIMP2:NFATC1:AXL:FCGRT
145	Curated_gene_sets	WONG_ENDMETRIUM_CANCER_DN	68	19	0.000480875	0.0215399	NID1:PLEKHH2:RAMP1:VGLL3:LDB2:HGF:DPP6:RUNX1T1:FBXO32:RORB:PAPPA:OLFM1:WT1:CTSW:DCN:TMEM132C:ATP8A2:F10:NDN
146	Curated_gene_sets	SILIGAN_BOUND_BY_EWS_FLT1_FUSION	43	14	0.000486979	0.0216639	XPR1:TRIM58:LRP1B:CHL1:LTF:FHIT:GALNT10:HEY1:PTPRD:PAPPA:ERC1:TNRC6A:CDH13:RIT2
147	Curated_gene_sets	ZHENG_FOXP3_TARGETS_UP	25	10	0.000492537	0.0217533	FAM46C:IRF6:RHOH:PRDM1:ABCB1:FAM107B:NRP1:CREM:UBASH3B:PRKCH
148	Curated_gene_sets	WEST_ADRENOCORTICAL_TUMOR_DN	480	85	0.000496868	0.0217533	PLA2G4A:COLEC11:NRXN1:TCF7L1:KIF5C:RAPGEF4:IGFBP5:TNS1:ARMC9:RAMP1:HDAC4:RBMS3:CLEC3B:MYLK:SLCO2A1:FGF12:SORBS2:CRHBP:VCAN:NR2F1:GABBR1:RNF39:TCF21:MICALL2:HGF:ABCB1:INTS9:RBPMS:RNF122:PLAT:BAALC:RIMS2:ZMYND11:DIP2C:ITGA8:CREM:CXCL12:SORBS1:WBP1L:CALHM2:LHPP:DOCK1:MGMT:LSP1:USP47:MICAL2:PARVA:SPON1:CCDC85B:MYO7A:CUL5:TAGLN:ROBO3:MGP:NR4A1:LRP1:LUM:DCN:SGCG:RORA:KIAA1024:FAH:ADAMTSL3:SV2B:TMEM204:…
149	Curated_gene_sets	REACTOME_REGULATION_OF_COMMISSURAL_AXON_PATHFINDING_BY_SLIT_AND_ROBO	10	6	0.000501774	0.0217533	ROBO2:SLIT3:SLIT1:ROBO3:NELL2:NTN1
150	Curated_gene_sets	CHEBOTAEV_GR_TARGETS_DN	112	27	0.000502387	0.0217533	VWA1:GUCA2A:DAB1:PLA2G4A:PTPN14:IGFBP5:PLCXD2:PHLDB2:LIMCH1:FAM47E-STBD1:PCDHB5:C2:DPY19L1:PLAT:CXCL12:SORCS3:SVIP:PDZRN4:KCTD4:RASA3:NRXN3:LOXL1:COTL1:KLHL10:NPTX1:MYL9:FAM19A5
151	Curated_gene_sets	ONDER_CDH1_SIGNALING_VIA_CTNNB1	79	21	0.00051988	0.0223617	CREG1:PRRX1:LTBP1:COL6A3:LMCD1:IGFBP7:MAP1B:VCAN:NREP:GALNT10:CD83:SYBU:ERMP1:PRUNE2:KCNMA1:MICAL2:TAGLN:SCNN1A:GREM1:ICAM1:MYL9
152	Curated_gene_sets	PEREZ_TP53_AND_TP63_TARGETS	184	39	0.000578367	0.0247138	FAM46C:CNNM4:PLCD1:PLCXD2:PPP2R2C:STOX2:SLC9A3:UBE2QL1:CXCL14:ARID1B:MICALL2:AUTS2:EPPK1:SEMA4D:CELF2:IGF2:PTPRJ:ZNF385A:SMAD9:GRTP1:PPP1R13B:PAK6:RORA:ST8SIA2:CRAMP1L:CX3CL1:DOC2B:NTN1:KSR1:RAB11FIP4:TNRC6C:NPTX1:APC2:DEDD2:PPP1R16B:COL9A3:COL18A1:CABP7:WNT7B
153	Curated_gene_sets	ZHOU_INFLAMMATORY_RESPONSE_LPS_UP	343	64	0.000595316	0.0249185	MORN1:TP73:SPSB1:RPTN:DCAF8:DCAF8:PTGS2:IRF6:CTNNA2:SGPP2:ITGA9:WNT5A:CADPS:KIAA2018:NPHP3-AS1:SULT1E1:FAM47E-STBD1:PDLIM5:LEF1:ELOVL7:NIPAL4:RNF144B:FILIP1:FSCN1:RAPGEF5:TBX20:COBL:ESCO2:SNTG1:NKAIN3:TPD52:ZBTB10:DMRTA1:NFKB2:SPON1:SCGB1D1:NOX4:SIK3:ADAMTS20:SPATS2:SRGAP1:PPFIA2:HAL:BRCA2:MCF2L:NPAS3:TTC9:AGBL1:IRF8:CDH15:CCL15:WNK4:NBR2:NEDD4L:ICAM1:SYDE1:KLK10:ZNF471:PTPN1:UPB1:HPS4:LIMK2:TEX3…
154	Curated_gene_sets	CHARAFE_BREAST_CANCER_LUMINAL_VS_BASAL_DN	429	77	0.000596003	0.0249185	CAMTA1:LUZP1:CLIC4:WLS:DPYD:RGL1:PTGS2:PLA2G4A:GALNT2:AKT3:EHBP1:ANTXR1:TGFA:SEPT10:ORMDL1:CFLAR:HRH1:RBMS3:PHLDB2:IL20RB:WWTR1:MBNL1:SCHIP1:IGF2BP2:TBC1D1:IGFBP7:IL15:ANKRD33B:CARD6:GM2A:GFOD1:DST:AMD1:DCBLD1:SGK1:PPP1R14C:FSCN1:OSBPL3:SKAP2:MDFIC:CAV2:PLAT:FZD6:FAM83A:NRP1:BICC1:PLAU:PRKCDBP:RRAS2:NAV2:CD59:ZBTB16:UBASH3B:PKP2:CORO1C:IRS2:COL4A1:COL4A2:HIF1A:IFI27:MYO1E:ANXA2:SMAD3:ALDH1A3:COTL…
155	Curated_gene_sets	ZWANG_TRANSIENTLY_UP_BY_2ND_EGF_PULSE_ONLY	1395	214	0.000597615	0.0249185	MMEL1:SLC2A5:TNFRSF1B:ESPNP:LCK:MANEAL:COL9A2:GUCA2A:GLIS1:FAM151A:IL12RB2:RPTN:MPZ:ANKRD45:TDRD5:NMNAT2:PM20D1:SERTAD4:CAPN9:TRIM67:WDR64:OR2L13:GRHL1:WDR43:STON1:NRXN1:VAX2:ANKRD53:CCDC142:LOXL3:CD8A:LYG2:POLR1B:DPP10:CCDC148:CSRNP3:HOXD13:COL5A2:COL6A3:LRRFIP1:PPARG:FBLN2:CLEC3B:CCR3:ITIH1:SYNPR:PLCXD2:KALRN:RAB43:SLCO2A1:RBP1:WWTR1:IGSF10:KCNMB2:PEX5L:MUC4:MFI2:ADRA2C:JAKMIP1:UGDH:APBB2:NPFFR…
156	Curated_gene_sets	VECCHI_GASTRIC_CANCER_EARLY_DN	317	60	0.000598505	0.0249185	PRDM16:RIMS3:DAB1:PTGER3:FAM46C:SEMA4A:RGS13:GREM2:MAL:KIF5C:ZNF385B:TMEFF2:RBMS3:ACOX2:VEPH1:KCNMB2:PCDH7:CWH43:STAP1:SULT1E1:STOX2:SORBS2:UBE2QL1:RGMB:EBF1:F13A1:FUT9:NT5DC1:VSTM2A:MAGI2:MDFIC:PTPRZ1:CLU:PNOC:UNC5D:MAMDC2:SVEP1:ITIH5:CXCL12:PBLD:CYP2C9:GIF:ZBTB16:PCDH9:SLC15A1:GABRB3:RORA:THSD4:HDGFRP3:NTRK3:SYNM:GNAO1:ASPA:DTNA:SYT4:GNG7:ATP4A:SULT2A1:ZNF471:TMPRSS6
157	Curated_gene_sets	DACOSTA_UV_RESPONSE_VIA_ERCC3_TTD_DN	80	21	0.000623291	0.0255279	PEX14:ROR1:INTS3:ZEB2:MITF:FAM193A:MSH3:ATXN1:DST:SYNJ2:MAD1L1:SKAP2:AMPH:RBPMS:SGMS1:BTAF1:PLCE1:TEAD1:NAV3:DOCK9:MALT1
158	Curated_gene_sets	WP_DISRUPTION_OF_POSTSYNAPTIC_SIGNALING_BY_CNV	30	11	0.000624933	0.0255279	NRXN1:SYNGAP1:GRM1:STX1A:GRIN1:NRXN2:DLG2:NRXN3:NLGN2:DLGAP1:SHANK1
159	Curated_gene_sets	PID_RETINOIC_ACID_PATHWAY	30	11	0.000624933	0.0255279	NCOA1:RBP1:CCNH:MAPK14:RXRA:RARG:NCOR2:AKT1:RARA:PRKCA:PRKCG
160	Curated_gene_sets	PID_TRKR_PATHWAY	59	17	0.000637125	0.0258633	PRKCZ:PIK3R1:RASA1:SQSTM1:ELMO1:DNM1:DOCK1:RHOG:GAB2:NTF3:FRS2:MCF2L:MAP2K1:NTRK3:RIT2:NEDD4L:TIAM1
161	Curated_gene_sets	REACTOME_TRANSMISSION_ACROSS_CHEMICAL_SYNAPSES	241	48	0.000646994	0.025889	GRIK3:GNG4:ADCY3:CHRNA1:ERBB4:PRKAG3:CHRND:CHRNG:CACNA2D3:GNB4:GABRA4:GABRB1:ADCY2:RASGRF2:GABRA6:GABBR1:MYO6:RPS6KA2:PRKAR1B:STX1A:CHRNA2:GABBR2:STXBP1:GRIN1:CACNA1B:CHAT:DLG2:SLC6A12:TUBA1B:SYT1:PPFIA2:ADCY4:GABRB3:GABRA5:GABRG3:GIT1:PPM1E:PRKCA:GNG7:PPFIA3:PRKCG:CACNG8:PLCB1:CHRNA4:GRIK1:COMT:SYN3:CACNG2
162	Curated_gene_sets	BEGUM_TARGETS_OF_PAX3_FOXO1_FUSION_UP	54	16	0.000649716	0.025889	DPYD:LTBP1:PTPRG:CLSTN2:PCDH7:GPM6A:NR2F1:SLIT3:CDYL:FARS2:SGK1:AUTS2:MDFIC:PLXNC1:GNAS:ADAMTS1
163	Curated_gene_sets	GUTIERREZ_CHRONIC_LYMPHOCYTIC_LEUKEMIA_DN	54	16	0.000649716	0.025889	ID3:LCK:COL9A2:ROR1:GBP2:IGSF3:FILIP1L:LEF1:ATXN1:HIVEP2:RXRA:PTPRO:ABR:ABCA6:COL9A3:CELSR1
164	Curated_gene_sets	KEGG_PATHWAYS_IN_CANCER	312	59	0.000676974	0.0268106	PTGS2:WNT3A:AKT3:MSH2:MSH6:TGFA:CTNNA2:TCF7L1:FZD5:PPARG:CTNNB1:WNT5A:MITF:FGF12:FGF5:LEF1:PIK3R1:MSH3:LAMA4:HGF:LAMB1:LAMB4:RUNX1T1:FZD6:PTK2:CDKN2A:DAPK1:RALGDS:RXRA:CUL2:WNT8B:NFKB2:SUFU:FGFR2:BIRC2:ZBTB16:CBL:WNT5B:CDK2:FGF9:BRCA2:FGF14:COL4A1:COL4A2:HIF1A:AKT1:DAPK2:MAP2K1:SMAD3:PLCG2:NOS2:ERBB2:RARA:ITGA2B:PRKCA:APC2:PRKCG:STK4:WNT7B
165	Curated_gene_sets	IVANOVA_HEMATOPOIESIS_STEM_CELL_LONG_TERM	198	41	0.000697023	0.0274373	PRDM16:TNFRSF8:DCAF6:PRRX1:SMYD3:TCF7L1:TNS1:ZBTB20:RBP1:LDB2:EPHA5:SYNPO:GM2A:ZNF354A:ATXN1:KIF6:FILIP1:PRDM1:EPB41L2:ZAN:PTPRZ1:DNM1:ZMYND11:PLXDC2:BICC1:ZRANB1:PRKCDBP:EXT2:CACNA1C:SRGAP1:ZNF268:CTD-2140B24.4:PCDH9:DOCK9:MYO5C:RORA:GPRC5B:LPHN1:ZNF784:EYA2:COL18A1:LARGE
166	Curated_gene_sets	MCBRYAN_PUBERTAL_BREAST_6_7WK_UP	180	38	0.00073134	0.0286148	SLC2A5:LCK:PRRX1:CHI3L1:GALNT2:ZEB2:IGFBP5:TNS1:CLEC3B:ZBTB20:DHX36:PIK3R1:GM2A:MAPK14:PI16:LAMA4:EPB41L2:QKI:FSCN1:CUX1:HIPK2:PCMTD1:DAPK1:STOM:SORBS1:EBF3:TMEM45B:WNK1:RAB5B:AKT1:SECISBP2L:KIF1C:RAB5C:TIMP2:SLC25A10:SLC25A10:DNM2:NFIX:COMT
167	Curated_gene_sets	PID_VEGFR1_2_PATHWAY	65	18	0.000753127	0.0292908	CTNNB1:PRKCD:PIK3R1:MAPK14:FYN:PTK2:VCL:PTPRJ:CBL:FLT1:AKT1:NEDD4:MAP2K1:IQGAP1:ITGB3:PRKCA:DNM2:MAPK11
168	Curated_gene_sets	REACTOME_CHONDROITIN_SULFATE_BIOSYNTHESIS	18	8	0.000793469	0.0305574	BCAN:CHPF:VCAN:CSGALNACT1:CSGALNACT2:CHST15:DCN:NCAN
169	Curated_gene_sets	MASSARWEH_TAMOXIFEN_RESISTANCE_UP	528	91	0.000795105	0.0305574	WLS:FAM73A:IGSF3:PTGFRN:SCYL3:PTPN14:WDR26:ENAH:ROCK2:NCOA1:GPR39:FAM171B:COL5A2:ERBB4:IGFBP5:LMCD1:RAD18:TRAK1:PRICKLE2:MYLK:SCHIP1:BCL6:FAM114A1:LIMCH1:CDS1:MTMR12:PDE4D:GALNT10:EBF1:RNF144B:FUT9:EPB41L2:QKI:IQCE:MACC1:CAV2:MTUS1:SPAG1:MTSS1:PPAPDC2:CDC14B:STOM:NET1:SFMBT2:NEBL:KIAA1217:RASGEF1A:TIMM23B:TIMM23:ANK3:KCNMA1:FAM160B1:TACC2:INPP5A:SWAP70:PLEKHA7:NUCB2:PTPRJ:CTNND1:SYT7:SHANK2:TMEM1…
170	Curated_gene_sets	DAWSON_METHYLATED_IN_LYMPHOMA_TCL1	55	16	0.000811557	0.0310063	AJAP1:PKP4:STK39:HOXD13:OSBPL6:PCDH10:NRSN1:CLVS2:AUTS2:TMEM229A:RUNX1T1:PTPRD:CDKN2A:EGR2:MDGA2:MDGA2:MACROD2
171	Curated_gene_sets	NOURUZI_NEPC_ASCL1_TARGETS	133	30	0.000833581	0.0316614	GFI1:TRIM67:SLC35F3:TPO:MFSD9:ST6GAL2:TNS1:JAKMIP1:PROM1:NKAIN2:EYA1:RIMS2:FAM83A:KCNK9:SLC45A4:PAX5:RASGEF1A:EGR2:MUC5B:MICAL2:DSCAML1:LMO3:SSTR5:SMPD3:ATP2A3:GPR142:NPTX1:CBLN2:HRC:PCBP3
172	Curated_gene_sets	KEGG_CALCIUM_SIGNALING_PATHWAY	163	35	0.000843663	0.0318581	PTGER3:PTGFR:ADCY3:ERBB4:HRH1:PLCD1:MYLK:BST1:SLC25A31:ADCY2:HTR4:GRM1:HTR5A:GRIN1:CACNA1B:TACR2:PLCE1:CACNA1C:NOS1:CYSLTR2:LTB4R2:LTB4R2:ADCY4:RYR3:PLCG2:ATP2A3:ADORA2B:NOS2:ERBB2:PRKCA:SLC8A2:PRKCG:PLCB1:GNAS:NTSR1:CACNA1I
173	Curated_gene_sets	KINSEY_TARGETS_OF_EWSR1_FLII_FUSION_DN	302	57	0.000866198	0.03252	ECE1:NUDT17:THBS3:ATOH8:COL5A2:KLF7:MAP2:IGFBP5:CHPF:LRRFIP1:VGLL4:RBMS3:TRAK1:AMOTL2:IGF2BP2:LIMCH1:IGFBP7:SPARCL1:RNF150:CARD6:MSH3:LNPEP:MAN2A1:EBF1:TENM2:DST:LAMA4:HBP1:DLC1:EYA1:RORB:GSN:LINC00963:KIAA1217:PSAP:PLAU:VCL:PARVA:CD59:GAB2:TAGLN:CEP164:MGP:LMO3:LIMA1:SRGAP1:NCOR2:DCLK1:LMO7:SECISBP2L:ZNF423:SLC38A7:HOXB13:TIMP2:COLEC12:BLCAP:GNAS
174	Curated_gene_sets	REACTOME_CELL_CELL_COMMUNICATION	122	28	0.00091909	0.0343074	LIMS2:CTNNB1:CD47:CDH18:CDH12:FYB:PIK3R1:DST:FYN:SDK1:SKAP2:MAGI2:CLDN12:CLDN15:PTK2:CD151:PARVA:CTNND1:CADM1:KIRREL3:IQGAP1:CDH8:CDH13:CDH15:ITGB4:CDH2:PARD6G:CDH4
175	Curated_gene_sets	BIOCARTA_EGFR_SMRTE_PATHWAY	11	6	0.000987328	0.036644	MAPK14:RXRA:ZBTB16:NCOR2:MAP2K1:RARA
176	Curated_gene_sets	KUMAR_TARGETS_OF_MLL_AF9_FUSION	363	66	0.0010019	0.0368395	LCK:ZNF362:RNF220:PGM1:RUSC1:PLA2G4A:NAV1:CD8A:ZAP70:POLR1B:PKP4:STK39:RAMP1:LTF:MBNL1:GNB4:STX18:HS3ST1:UGDH:LEF1:PRDM5:PGRMC2:ALDH7A1:IRGM:EBF1:CD83:GABBR1:FYN:HIVEP2:HOXA7:TBXAS1:BLK:CTSB:RBPMS:IMPAD1:PDE7A:PTP4A3:CYHR1:TTC39B:PAX5:FBP1:OLFM1:LHX3:SFMBT2:LHPP:TRIM5:EXT2:CTSW:TPI1:KLRC1:MGP:SMAGP:PAN2:ANKRD10:F10:CIDEB:AKT1:METTL9:VPS53:MYO1D:PRKCA:RAB31:NFIX:AKAP8:EYA2:ATXN10
177	Curated_gene_sets	JAEGER_METASTASIS_DN	233	46	0.00100394	0.0368395	CTNNBIP1:LOR:IRF6:QPCT:MAL:LTF:WNT5A:TMEM45A:CWH43:CDS1:ADCY2:CXCL14:DST:MYO6:COBL:PTPRZ1:DPP6:DEFB1:GRHL2:EPPK1:CLIC3:NET1:NEBL:ANK3:CDHR1:FGFR2:PKP3:BBOX1:CTNND1:SCNN1A:PLXNC1:HAL:LTB4R:BCL11B:PAK6:RORA:ASPA:SOX15:RAPGEFL1:ITGB4:DSC3:FXYD3:KLK8:KLK10:KLK11:BMP7
178	Curated_gene_sets	WP_RETT_SYNDROME_CAUSING_GENES	41	13	0.00101719	0.0369085	SCN1A:SATB2:SYNGAP1:HIVEP2:SRRM3:TRRAP:SMARCA2:GABBR2:STXBP1:NCOR2:SYNE2:GNAO1:TCF4
179	Curated_gene_sets	PID_AMB2_NEUTROPHILS_PATHWAY	41	13	0.00101719	0.0369085	PRKCZ:FGR:LCK:SELP:FYN:BLK:PLAT:PLAU:LRP1:AKT1:MYH2:YES1:ICAM1
180	Curated_gene_sets	PID_PTP1B_PATHWAY	51	15	0.00103252	0.0372569	FGR:LCK:PRLR:PIK3R1:FER:FYN:LEP:BLK:NOX4:AKT1:ITGA2B:ITGB3:YES1:CDH2:PTPN1
181	Curated_gene_sets	BRUINS_UVC_RESPONSE_VIA_TP53_GROUP_A	805	130	0.00107202	0.0384683	PRDM16:PRDM2:CLIC4:HIVEP3:RNF220:IFI44L:RPTN:RGS8:PLA2G4A:PGBD5:AKT3:GRHL1:FBLN7:ZEB2:CSRNP3:LHFPL4:TBC1D5:OSBPL10:CNOT10:ARPP21:ITGA9:WNT5A:CD47:ZBTB20:GP9:XRN1:BCL6:LDB2:ZCCHC4:RHOH:SULT1E1:ABCG2:CLGN:SEMA5A:ANKRD33B:PRLR:PIK3R1:NUDT12:LECT2:PRELID2:PPP2R2B:GM2A:TENM2:C2:COL11A2:DST:ECT2L:COBL:LAT2:HIPK2:DEFB1:TUSC3:PNOC:PDE7A:SPAG1:GPIHBP1:GLDC:PTPRD:ENTPD2:MYO3A:BICC1:EGR2:COL13A1:CPXM2:CALY:…
182	Curated_gene_sets	GU_PDEF_TARGETS_UP	67	18	0.00110938	0.0395903	COL5A2:COL6A3:WNT5A:LEF1:CDH18:PTK2:COL13A1:PLCE1:DOCK1:COL4A1:COL4A2:HIF1A:SMAD3:PRKCA:CDH2:TCF4:SERPINB7:COL6A1
183	Curated_gene_sets	PID_NETRIN_PATHWAY	32	11	0.00116485	0.0413427	PIK3R1:MAP1B:FYN:ELMO1:PTK2:DAPK1:DOCK1:MAP2K1:PITPNA:NTN1:YES1
184	Curated_gene_sets	URS_ADIPOCYTE_DIFFERENTIATION_UP	62	17	0.00117882	0.041611	PPARG:PLCD1:DGKG:PCDH7:ABCE1:MTMR12:CAP2:PTPRZ1:KCNH2:MTUS1:RXRA:PFKFB3:APLNR:ATP8A2:ADORA2B:PTPRS:LBP
185	Curated_gene_sets	BONOME_OVARIAN_CANCER_SURVIVAL_SUBOPTIMAL_DEBULKING	453	79	0.00120928	0.0424557	NADK:ICMT:ECE1:PTGER3:MARC2:NID1:DTNB:EIF2AK3:GPR39:STK39:IGFBP5:HDAC4:LRRFIP2:MAPKAPK3:WNT5A:FILIP1L:HHLA2:BST1:LIMCH1:SPARCL1:ABCG2:PIK3R1:RASA1:CCNH:NR2F1:FAM172A:TTC37:MAN2A1:YTHDC2:PCDHA9:CDYL:EHMT2:COL21A1:DST:PDSS2:REV3L:RPS6KA2:IQCE:SRRT:CAV2:PTPRN2:TNKS:PSD3:RUNX1T1:PTPRD:GNE:STOM:CSGALNACT2:COL13A1:CCSER2:PKP3:IGF2:ZBTB16:EPS8:SMAGP:RARG:ESPL1:CDK2:DCN:NDN:ADAMTSL3:PDE8A:SLC47A1:RHOT1:N…
186	Curated_gene_sets	ACEVEDO_LIVER_CANCER_WITH_H3K27ME3_DN	148	32	0.001218	0.0425318	IGSF3:LYST:RAPGEF4:SATB2:PP2D1:GP5:PCDHGB3:PCDHGA6:PCDHGA7:PCDHGB4:PCDHGA8:PCDHGA9:PCDHGB6:PCDHGA10:PCDHGB7:PCDHGA11:KCNIP1:CDKN2A:CHST15:NUCB2:TMEM132C:ATP8A2:COCH:TTC9:ADAMTSL3:NTRK3:ANKRD29:DTNA:PPP1R16B:TSHZ2:COL18A1:APOL2
187	Curated_gene_sets	KEGG_DILATED_CARDIOMYOPATHY	84	21	0.00123489	0.042891	ADCY3:ITGA9:CACNA2D3:ITGB5:ADCY2:SGCD:ITGA8:CACNA1C:ITGB7:SGCG:MYH7:ADCY4:ITGA2B:ITGB3:ITGB4:TPM4:CACNG8:CACNG6:TNNI3:GNAS:CACNG2
188	Curated_gene_sets	HAN_SATB1_TARGETS_UP	386	69	0.00124239	0.0429218	PDE4B:ZRANB2:MLLT11:PTGS2:KISS1:RRP15:LTBP1:QPCT:ANTXR1:EIF2AK3:ZAP70:KLF7:IGFBP5:TNS1:HDAC4:HRH1:CNOT10:CTNNB1:WNT5A:MITF:TMEM45A:PLOD2:LIMCH1:PDE4D:OSTM1:FYN:ECHDC1:AHI1:QKI:RPS6KA2:LAMB1:DNAJB6:PDGFRL:PLAT:RIMS2:GPR21:STXBP1:FAM45A:CHST15:PTPRE:SHANK2:DDX10:TMEM45B:DENND5B:NELL2:RARG:RBM19:FLT1:PCDH9:STXBP6:NEDD4:PDE8A:DCTN5:MYO1D:MBP:JAK3:MYL9:CDH4:TXNRD2:APOL3:APOL2:CYB5R3:PACSIN2:TSPO:SAMM5…
189	Curated_gene_sets	TORCHIA_TARGETS_OF_EWSR1_FLI1_FUSION_UP	242	47	0.00127633	0.0438612	PTGER3:RUSC1:NMNAT2:RGL1:LYST:AKT3:TGFA:ASB1:BBX:SCHIP1:GNB4:GP5:PCDH7:PDLIM5:DCLK2:MTMR12:LTC4S:SERPINB6:CAP2:TRIM26:TTC39B:DIP2C:OPTN:CREM:PKP3:CD59:PTPRJ:PC:CACNA1C:EPS8:CMAS:ITGB7:FGD6:GRTP1:PRKCH:TECPR2:PPP1R13B:HSD3B7:RBL2:CPNE7:ATP2A3:PPM1E:TNNI3:MAVS:MACROD2:PCBP3:TMPRSS6
190	Curated_gene_sets	WIERENGA_STAT5A_TARGETS_DN	173	36	0.00130123	0.044138	MPL:ACOT11:SELP:GCSAML:ROCK2:LOXL3:CD47:MYLK:ITGB5:GP9:BANK1:RUFY1:GFOD1:STX1A:USP20:NOTCH1:PLXDC2:SH3PXD2A:ADRA2A:MS4A3:LGALS12:UBASH3B:ACRBP:ITGB7:IRS2:DAAM1:DLK1:PLCG2:COTL1:IRF8:GP1BA:LDLRAD4:ANGPTL6:TPM4:GP6:DNAAF3
191	Curated_gene_sets	WP_NEPHROTIC_SYNDROME	42	13	0.00130706	0.044138	SYNPO:PDSS2:LMX1B:PLCE1:PAX2:CD151:WT1:PTPRO:GPC5:MYO1E:WDR73:ITGB4:ADCK4
192	Curated_gene_sets	ULE_SPLICING_VIA_NOVA2	42	13	0.00130706	0.044138	CTNNA2:LRP1B:CHL1:EPHA5:EPB41L2:GRIN1:CACNA1B:ANK3:KCNMA1:TACC2:CADM1:GPHN:KCNQ2
193	Curated_gene_sets	MARTINEZ_RESPONSE_TO_TRABECTEDIN	47	14	0.00131157	0.044138	ROR1:KIFAP3:PPARG:PTPRG:LRBA:CUX1:STK3:ADK:DOCK1:MGMT:DDX10:NCOR2:SMAD3:TIAM1
194	Curated_gene_sets	ACEVEDO_LIVER_CANCER_WITH_H3K9ME3_UP	119	27	0.00134703	0.0447896	AK5:WDR64:GALNT5:MITF:CCDC54:IGSF11:TMEM108:KCNMB2:LIMCH1:ANK2:FYB:ELOVL7:VCAN:LTC4S:VWDE:POU6F2:LAMB4:ODF3:MS4A3:ANGPTL5:ENOX1:NRXN3:RARA:RIT2:CRTC1:EBF4:TRPM2
195	Curated_gene_sets	FARMER_BREAST_CANCER_BASAL_VS_LULMINAL	301	56	0.00135195	0.0447896	SLC2A5:CLIC4:STIL:TTC39A:PTGER3:LRRC8D:ANXA9:SLC19A2:CHI3L1:LBR:CAPN9:GREB1:PSME4:TCF7L1:ERBB4:GPD1L:ITGB5:SCHIP1:IGF2BP2:HS3ST1:APBB2:LRBA:GALNT7:GALNT10:PTTG1:TFAP2A:HIST1H1A:ATG5:AMD1:QKI:MPP6:BLVRA:KRT8P3:WWP1:SYBU:CDKN2A:FBP1:GABBR2:MCM10:SLC22A18:BBOX1:TMEM135:SCNN1A:ST8SIA1:LIMA1:KRT8:CORO1C:RALGAPA1:SERPINA5:MYO5C:CX3CL1:RARA:APPBP2:DSC3:TPX2:SLC2A10:CELSR1
196	Curated_gene_sets	ZHU_CMV_24_HR_DN	79	20	0.00135244	0.0447896	COL5A2:IGFBP5:XPC:MITF:MYLK:SULT1E1:CRHBP:VCAN:SERPINB6:LAMA4:HIVEP2:AHR:CXCL12:ADRA2A:CD151:IGF2:TAGLN:SGCG:TPM4:TNNI3
197	Curated_gene_sets	SWEET_LUNG_CANCER_KRAS_DN	394	70	0.00135851	0.0447896	ID3:CLIC4:GBP2:FAM46C:RPTN:LOR:ENAH:NID1:GREM2:KLF7:IGFBP5:CLEC3B:TMEM45A:CD47:ZBTB20:KALRN:RBP1:GYG1:WWTR1:GNB4:PROM1:LIMCH1:EPHA5:ANTXR2:SPARCL1:ADH1C:ANKRD33B:CXCL14:PCDHA9:TNXB:NOTCH4:MYO6:FYN:TCF21:QKI:AHR:LAMB1:HEY1:SMARCA2:PTPRD:DENND4C:GSN:DNM1:ZMYND11:COL13A1:VCL:SORBS1:INPP5A:PRKCDBP:MS4A6A:ZBTB16:CADM1:TAGLN:MGP:TENC1:DCN:FGF9:FLT1:ANKRD10:NDN:GCOM1:MYZAP:LOXL1:NTN1:CRHR1:TCF4:CD97:TNN…
198	Curated_gene_sets	CHIARADONNA_NEOPLASTIC_TRANSFORMATION_CDC25_UP	102	24	0.00143669	0.0471277	CHI3L1:ENAH:NID1:GREM2:PHLDB2:IGSF10:VCAN:MAN2A1:SYNPO:ADAM19:LAMA4:SMOC2:SRRT:CTSB:ANK3:FGFR2:LSP1:IGF2:NAV2:MGP:LMO7:DLK1:LOXL1:IMPACT
199	Curated_gene_sets	ALCALAY_AML_BY_NPM1_LOCALIZATION_DN	174	36	0.00144769	0.0472501	MECR:RRM2:FKBP1B:ITGA9:PROM1:IGFBP7:STAP1:ABCG2:BANK1:NNT:CRHBP:PTTG1:SERPINB6:HLA-DMA:KIFC1:RPS6KA2:HGF:ABCB1:MDFIC:CSGALNACT1:ANK1:BAALC:GSN:STOM:MCM10:EPS8:PLXNC1:TESC:POLE:DAAM1:PAK6:PITPNC1:SEPT9:B4GALT6:GNG7:TPX2
200	Curated_gene_sets	KAAB_HEART_ATRIUM_VS_VENTRICLE_UP	231	45	0.00149924	0.0486879	PDE4B:GJA5:RABGAP1L:NMNAT2:RTN4:MAL:ERBB4:CHL1:FBLN2:PRKCD:CADPS:CD47:MYLK:RBP1:TNK2:AFAP1:FAM114A1:MAP1B:VCAN:NR2F1:FAM172A:SYNPO:SLIT3:AUTS2:RELN:PRUNE2:CACNA1B:FGFR2:SLC22A18:MICAL2:CCDC85B:TAGLN:EPS8:SLC11A2:MYBPC1:TBX5:F10:GABRB3:DAPK2:PPIB:GNAO1:CCL14:CCL15-CCL14:ERBB2:TPGS2:PLCB1
201	Curated_gene_sets	REACTOME_O_LINKED_GLYCOSYLATION_OF_MUCINS	58	16	0.00151657	0.0488585	GALNT2:GALNT13:GALNT5:GALNT15:MUC4:GALNT7:GALNT10:MUC12:MUC17:RN7SKP54:MUC6:MUC5B:GALNT9:B3GNT9:ST3GAL2:B4GALT6:MUC16
202	Curated_gene_sets	DAVICIONI_TARGETS_OF_PAX_FOXO1_FUSIONS_UP	244	47	0.00152331	0.0488585	ID3:KCNN3:CREG1:PRRX1:NFASC:NID1:KCNS3:ALK:LTBP1:TCF7L1:NRP2:CUL3:PCDH7:ANK2:FBN2:GALNT10:ADAM19:SPDL1:SUPT3H:SGK1:DPY19L1:AUTS2:CAV2:ANK1:PLAT:SULF1:EYA1:PAX5:MED27:NEBL:CREM:PLAU:WBP1L:PTPRE:NELL1:DTX4:CADM1:PLXNC1:IRS2:DICER1:MEG3:PRKCA:TPM4:CDH4:ADAMTS1:COL18A1:ADRBK2
203	Curated_gene_sets	SENESE_HDAC3_TARGETS_DN	484	83	0.00152706	0.0488585	LRRC47:CLIC4:EDN2:PTGFRN:NFASC:SERTAD4:NID1:EFCAB2:ROCK2:NCOA1:ANTXR1:SH3RF3:UGGT1:PKP4:COL5A2:MARCH4:TNS1:RBMS3:LIMD1:NISCH:MITF:VGLL3:TMEM45A:BBX:GAP43:PCDH7:LIMCH1:PGRMC2:CXCL14:SYNPO:DCTN4:GALNT10:TENM2:PPP1R14C:LFNG:ZNF853:LAT2:BAIAP2L1:MDFIC:ESCO2:PLEKHA2:RIMS2:GNE:DNM1:CASC10:NANOS1:HSD17B12:EXT2:FIBP:CHKA:TAGLN:C2CD5:PKP2:NCOR2:ITGBL1:ZNF219:STXBP6:RIN3:CCDC85C:GABRB3:ANP32A:FAH:FBXL16:AA…
204	Curated_gene_sets	MARTINEZ_RB1_AND_TP53_TARGETS_UP	567	95	0.00155651	0.0495566	NADK:PTGFR:GBP2:RPTN:MTX1:UAP1:PTGS2:TMCC2:PTPN14:QPCT:PSME4:RTN4:MAP2:CHRND:ITGA9:PTPRG:TMEM45A:TF:ESYT3:KLB:PDLIM5:ADH1C:CASP6:ZFR:NDUFS4:MAP1B:ZBED3:RNF14:DCTN4:PTTG1:TMED9:LTC4S:SERPINB1:RANBP9:HLA-B:AMD1:QKI:SMOC2:PRKAR1B:BRAT1:FSCN1:AHR:TFPI2:PILRA:CLDN15:HBP1:CAV2:PTPRZ1:LEP:AGK:ABCB8:CTSB:HNF4G:RAD21:SPIN1:STOM:RABGAP1:RXRA:PFKFB3:ITIH5:CELF2:FAM107B:CXCL12:PSAP:SORBS1:FGFR2:IGF2:CARS:BBO…

## Sheet: Supplementary Table 5
			BRCA1 mutation carriers					BRCA1 epimutation carriers
No.	Category	GeneSet	N_genes	N_overlap	p	adjP	genes	N_genes	N_overlap	p	adjP	genes
1	Curated_gene_sets	BENPORATH_ES_WITH_H3K27ME3	1007	125	4.23931e-15	2.75343e-11	TNFRSF1B:IGSF21:EPHA10:NT5C1A:FOXD2:LHX8:BRINP2:CACNA1E:SUSD4:TRIM67:SLC35F3:KCNS3:NRXN1:TGFA:CYP26B1:PAX8:CNTNAP5:RAPGEF4:HOXD13:HOXD4:CDK5R2:SGPP2:SLCO2A1:KCNAB1:MECOM:ZFYVE28:KCNIP4:PHOX2B:GABRA4:PITX2:GRIA2:SPOCK3:CDH6:EGFLAM:MAST4:SLIT3:RASGEF1C:HLA-B:LRFN2:RUNX2:KCNQ5:RIPPLY2:EYA4:TCF21:RPS6KA2:SMOC2:HOXA4:TBX20:GRB10:ACTL6B:SLC26A5:LHFPL3:PRKAG2:DPP6:PTPRN2:CSMD1:LPL:NRG1:HEY1:PAX5:PGM5:PR…	1007	202	1.70587e-12	5.53982e-09	TP73:TNFRSF1B:IGSF21:PAX7:CSMD2:GRIK3:RSPO1:COL9A2:FOXD2:PTGER3:LHX8:PTGFR:BCAN:ASTN1:FAM163A:CR2:WNT3A:TRIM67:SLC35F3:KCNS3:DTNB:NRXN1:TGFA:VAX2:ATOH8:CD8A:MAL:FBLN7:CNTNAP5:ZEB2:KCNH7:RAPGEF4:HOXD13:TMEFF2:SATB2:ERBB4:SGPP2:RAMP1:GPD1L:CD47:SLCO2A1:CLSTN2:DGKG:GABRA4:CWH43:EPHA5:FGF5:SCD5:LEF1:DCLK2:LRBA:DCHS2:SPOCK3:SLC9A3:CTNND2:EGFLAM:FBN2:CXCL14:NRG2:CDX1:EBF1:SLIT3:RASGEF1C:HLA-B:ETV7:LRFN…
2	Curated_gene_sets	BENPORATH_SUZ12_TARGETS	898	102	3.16959e-10	6.86216e-07	TNFRSF1B:IGSF21:EPHA10:NT5C1A:CYP4X1:FOXD2:LHX8:BRINP2:CACNA1E:SUSD4:TRIM67:SLC35F3:CYP26B1:PAX8:RAPGEF4:HOXD13:HOXD4:CDK5R2:SGPP2:SLCO2A1:KCNAB1:MECOM:ZFYVE28:KCNIP4:TBC1D1:PHOX2B:GABRA4:PITX2:GRIA2:SPOCK3:CDH6:EGFLAM:RASGRF2:DPP6:VIPR2:CSMD1:LPL:NRG1:HEY1:PAX5:PGM5:GABBR2:LPPR1:KLF4:ASTN2:GAD2:PARD3:KCNMA1:GRID1:TLL2:CRTAC1:GFRA1:IGF2:ABCC8:ABTB2:NPAS4:SYT12:GPR83:ARHGAP20:LAYN:DSCAML1:PKNOX2:E…	898	179	5.87862e-11	7.63633e-08	TP73:TNFRSF1B:IGSF21:PAX7:GRIK3:RSPO1:YRDC:COL9A2:FOXD2:WLS:PTGER3:LHX8:PTGFR:GFI1:FAM46C:ASTN1:FAM163A:WNT3A:TRIM67:SLC35F3:VAX2:ATOH8:CD8A:MAL:FBLN7:ZEB2:RAPGEF4:HOXD13:TMEFF2:ERBB4:IGFBP5:SGPP2:SLCO2A1:ESYT3:CLSTN2:DGKG:TBC1D1:GABRA4:CWH43:EPHA5:FGF5:SCD5:LEF1:DCLK2:DCHS2:SPOCK3:SLC9A3:CTNND2:EGFLAM:CRHBP:RASGRF2:FBN2:CXCL14:NRG2:CAV2:DGKI:DPP6:VIPR2:CSMD1:GATA4:DLC1:NEFM:HTRA4:SDR16C5:SLCO5A1…
3	Curated_gene_sets	BENPORATH_EED_TARGETS	935	104	6.85142e-10	1.1125e-06	IGSF21:ARID1A:NT5C1A:FOXD2:LHX8:BRINP2:CACNA1E:SUSD4:TRIM67:SLC35F3:TGFA:CYP26B1:PAX8:HOXD13:HOXD4:CDK5R2:SGPP2:SLCO2A1:KCNAB1:ZFYVE28:SORCS2:PHOX2B:GABRA4:PITX2:GRIA2:SPOCK3:HIST1H3A:HIST1H3B:HIST1H3C:HIST1H3D:HIST1H3E:HIST1H3F:HIST1H3G:HIST1H3H:HIST1H3I:HIST1H3J:HLA-G:HLA-B:LRFN2:RUNX2:KCNQ5:MCHR2:EYA4:TCF21:AHR:DFNA5:HOXA4:TBX20:MAGI2:RELN:LHFPL3:VIPR2:CSMD1:LPL:NRG1:HEY1:MTSS1:PGM5:LPPR1:KLF4…	935	171	1.05392e-07	2.97619e-05	TP73:LRRC47:IGSF21:PAX7:ARID1A:GRIK3:RSPO1:YRDC:COL9A2:FOXD2:WLS:PTGER3:LHX8:PTGFR:GFI1:ASTN1:FAM163A:WNT3A:TRIM67:SLC35F3:TGFA:VAX2:ATOH8:CD8A:MAL:INPP4A:FBLN7:ZEB2:HOXD13:TMEFF2:ERBB4:SGPP2:SLCO2A1:ESYT3:CLSTN2:DGKG:SORCS2:GABRA4:IGFBP7:EPHA5:FGF5:SCD5:PCDH10:DCLK2:DCHS2:SPOCK3:SLC9A3:CTNND2:CRHBP:FBN2:CXCL14:NRG2:GALNT10:EBF1:HIST1H3A:HIST1H3B:HIST1H3C:HIST1H3D:HIST1H3E:HIST1H3F:HIST1H3G:HIST1…
4	Curated_gene_sets	MIKKELSEN_MEF_HCP_WITH_H3_UNMETHYLATED	184	35	1.06869e-09	1.38259e-06	OLFM3:SYCP1:NXPH2:SLC25A31:PCDHA1:PCDHA2:PCDHA3:PCDHA4:PCDHA5:PCDHA6:PCDHA7:PCDHA9:PCDHA10:PCDHA11:PCDHA12:PCDHA13:PCDHAC1:PCDHB7:GLRA1:CLVS2:BHLHA15:CNTNAP2:DPP6:LY6K:GSN:NPAS4:PIWIL1:LTB4R:RBFOX1:DPEP3:NLGN2:CHAD:DLGAP1:ZNF516:FGF22:KLK10:WBP2NL	184	50	5.44798e-08	1.68498e-05	VWA1:SLC2A5:IL12RB2:OLFM3:SYNPR:IL20RB:SLC25A31:PCDHA1:PCDHA2:PCDHA3:PCDHA4:PCDHA5:PCDHA6:PCDHA7:PCDHA9:PCDHA10:PCDHA11:PCDHA12:PCDHA13:PCDHAC1:PCDHB5:NSD1:NRSN1:CLVS2:CNTNAP2:DPP6:HTR5A:EPPK1:GSN:SPAG6:PLCE1:NPAS4:CCDC67:ACRBP:ZNF385A:NOS1:PIWIL1:LTB4R:TRPM1:DPEP3:NLGN2:SOX15:RCVRN:KRT26:GFAP:HSF5:DLGAP1:ZNF516:JAK3:KLK10:COL9A3:CACNG2
5	Curated_gene_sets	MIKKELSEN_MEF_HCP_WITH_H3K27ME3	566	72	1.27722e-09	1.38259e-06	IGSF21:EPHA8:NHLH2:CACNA1E:IRF6:SLC35F3:RYR2:ALK:PAX8:DPP10:RAPGEF4:HOXD4:MARCH4:CDK5R2:ADRA2C:PPP2R2C:SLC34A2:PHOX2B:PRDM8:GRIA2:CPLX2:PFN3:RASGEF1C:TNXB:TCF21:TBX20:ACTL6B:SLC26A5:RELN:TMEM229A:PTPRN2:DLGAP2:CSMD1:FGF17:CALB1:BAI1:KCNT1:GRID1:CRTAC1:CPXM2:BRSK2:KCNQ1:RBMXL2:ABCC8:DSCAML1:NTM:SRRM4:PTGDR:KCNH5:GABRA5:GABRG3:OTUD7A:DOC2A:CDH8:MARVELD3:DOC2B:ALOX12B:SLC47A1:IKZF3:CRHR1:CA10:DCC:CB…	566	124	1.46603e-10	1.58698e-07	PRKCZ:PTCHD2:IGSF21:PAX7:EPHA8:GRIK3:RSPO1:GFI1:NHLH2:BCAN:ASTN1:FAM163A:IRF6:WNT3A:SLC35F3:ALK:MAL:DPP10:C1QL2:KCNH7:RAPGEF4:MARCH4:LHFPL4:HRH1:FGF12:ADRA2C:PPP2R2C:CWH43:PRDM8:SLC9A3:PRLR:TMEM174:CRHBP:FSTL4:HTR4:CDX1:KCNIP1:PFN3:RASGEF1C:TNXB:TFAP2D:TCF21:GRM1:NXPH1:TBX20:VSTM2A:SLC26A5:RELN:TMEM229A:PTPRN2:DLGAP2:CSMD1:GRHL2:DPYS:FBP1:KCNT1:LHX3:SPAG6:CHAT:SLIT1:SORCS3:CPXM2:TCERG1L:BRSK2:NEL…
6	Curated_gene_sets	BENPORATH_PRC2_TARGETS	588	70	3.38044e-08	3.13656e-05	IGSF21:NT5C1A:FOXD2:LHX8:BRINP2:CACNA1E:SUSD4:TRIM67:SLC35F3:CYP26B1:PAX8:HOXD13:HOXD4:CDK5R2:SGPP2:SLCO2A1:KCNAB1:ZFYVE28:PHOX2B:GABRA4:PITX2:GRIA2:SPOCK3:CSMD1:LPL:NRG1:HEY1:PGM5:LPPR1:KLF4:ASTN2:GAD2:KCNMA1:GRID1:CRTAC1:ABCC8:ABTB2:NPAS4:SYT12:ARHGAP20:LAYN:DSCAML1:PKNOX2:HOXC11:HOXC8:HOXC4:HOXC4:TBX5:GPC5:ADCY4:PTGDR:OCA2:SEMA6D:RASGRF1:ST8SIA2:SCNN1G:MT1A:NTN1:HNF1B:IKZF3:CRHR1:HOXB6:B4GALNT…	588	118	8.13896e-08	2.40284e-05	TP73:IGSF21:PAX7:GRIK3:RSPO1:COL9A2:FOXD2:PTGER3:LHX8:PTGFR:ASTN1:FAM163A:WNT3A:TRIM67:SLC35F3:VAX2:ATOH8:CD8A:MAL:FBLN7:ZEB2:HOXD13:TMEFF2:ERBB4:SGPP2:SLCO2A1:CLSTN2:DGKG:GABRA4:EPHA5:FGF5:SCD5:DCLK2:DCHS2:SPOCK3:SLC9A3:CTNND2:FBN2:CXCL14:NRG2:DGKI:CSMD1:GATA4:NEFM:SLCO5A1:HEY1:GDF6:RSPO2:CSMD3:FBP1:LPPR1:PAPPA:ASTN2:LMX1B:CACNA1B:ADARB2:SPAG6:PRKG1:KCNMA1:SLIT1:PAX2:SORCS3:SORCS1:ADRA2A:SPON1:N…
7	Curated_gene_sets	MEISSNER_BRAIN_HCP_WITH_H3K4ME3_AND_H3K27ME3	1030	103	2.07898e-07	0.000154653	IGSF21:ALPL:RNF220:STIL:BCAR3:SYT2:PTPN14:KIF26B:TRIM58:KCNS3:DYSF:DPP10:SNED1:ITGA9:ITGB5:SLCO2A1:MECOM:IGF2BP2:ADRA2C:SORCS2:PRDM8:SLC12A7:EGFLAM:RASGRF2:N4BP3:ADAMTS2:CD83:ABT1:B3GAT2:C6ORF165:C6orf165:EYA4:SMOC2:ELFN1:RELN:PLXNA4:DPP6:VIPR2:MTUS1:LPL:EBF2:RBPMS:SPIDR:FZD6:GLDC:PGM5:KLF4:ASS1:ENTPD2:CCDC3:KIAA1217:GAD2:TSPAN15:TLL2:CRTAC1:GFRA1:FGFR2:SWAP70:BDNF:ABTB2:GPR83:NTF3:PTPRO:LIN7A:TE…	1030	203	8.21407e-12	1.7181e-08	PRKCZ:PRDM16:IGSF21:ID3:LDLRAP1:MAP3K6:GRIK3:RSPO1:RNF220:STIL:GLIS1:ROR1:PTGER3:SLC44A5:RHBG:BCAN:FAM163A:SYT2:SOX13:PTPN14:DISC1:PLD5:TRIM58:FAM110C:SNTG2:RRM2:KCNS3:ATOH8:MAL:FBLN7:DPP10:C1QL2:SATB2:FZD5:IGFBP5:SNED1:HRH1:FBLN2:CMTM7:ITGA9:WNT5A:PHLDB2:ITGB5:TMEM108:SLCO2A1:ESYT3:PLOD2:WWTR1:IGF2BP2:ADRA2C:SORCS2:PROM1:CORIN:CWH43:IGFBP7:ANTXR2:PRDM8:FGF5:PDLIM5:LEF1:SLC9A3:ANKRD33B:EGFLAM:RAS…
8	Curated_gene_sets	MIKKELSEN_IPS_WITH_HCP_H3K27ME3	97	21	2.38112e-07	0.000154653	CACNA1E:HOXD4:PHOX2B:PRDM8:SLC25A31:PCDHA2:PCDHA3:PCDHA4:PCDHA10:PCDHA11:PCDHA13:PCDHB7:ACTL6B:CALB1:IGF2:NPAS4:NTM:HOXC8:TBX5:ASIC2:HOXB6:CACNA1G:CA10	97	26	0.000103043	0.00806343	GFI1:HOXD10:FGF12:PRDM8:SLC25A31:TMEM174:PCDHA2:PCDHA3:PCDHA4:PCDHA10:PCDHA11:PCDHA13:KCNIP1:TFAP2D:GRM8:KCNK9:PAPPA:SORCS3:IGF2:NPAS4:NTM:LRRK2:HOXC8:TBX5:ASIC2:CA10:NFIX:CACNG2
9	Curated_gene_sets	MEISSNER_NPC_HCP_WITH_H3K4ME2_AND_H3K27ME3	333	42	4.48302e-06	0.0020798	IGSF21:LHX8:SYT2:RYR2:KCNS3:ALK:ST6GAL2:DPP10:HOXD13:CDK5R2:SGPP2:ADRA2C:PPP2R2C:EGFLAM:ADAMTS2:RASGEF1C:SMOC2:AHR:COBL:ACTL6B:PTPRN2:DLGAP2:BAI1:GABBR2:CRTAC1:IGF2:TMEM151A:SYT12:DSCAML1:TESC:GABRA5:GABRG3:RASGRF1:CDH8:VAT1L:IKZF3:CRHR1:PTPRT:GNAS:KCNQ2:SOX18:TBX1	333	81	1.65343e-09	1.34238e-06	PRDM16:TP73:IGSF21:GRIK3:RSPO1:PTGER3:LHX8:PTGFRN:SYT2:WNT3A:PGBD5:GNG4:PLD5:KCNS3:ALK:MAL:ST6GAL2:DPP10:C1QL2:GALNT13:HOXD13:SGPP2:CADPS:CLSTN2:ADRA2C:PPP2R2C:GABRB1:FAM47E-STBD1:CLGN:EGFLAM:ANKRD34B:CXCL14:RASGEF1C:SMOC2:AHR:COBL:BAIAP2L1:PTPRN2:DLGAP2:UNC5D:SNTG1:GABBR2:PAPPA:CHAT:COL13A1:PAX2:SORCS3:VWA2:IGF2:SYT12:DSCAML1:OAF:WSCD2:HRK:TESC:GABRA5:GABRG3:CDH8:CA7:SPIRE2:RAB11FIP4:IKZF3:CRHR1…
10	Curated_gene_sets	MIKKELSEN_MCV6_HCP_WITH_H3K27ME3	415	49	4.88294e-06	0.00211432	IGSF21:EPHA8:NHLH2:SYT2:SLC35F3:TRIM58:DYSF:DPP10:NXPH2:HOXD4:CCK:CACNA2D3:GNB4:ADRA2C:SLC34A2:GABRA4:GRIA2:PCDHAC2:ADAMTS2:RASGEF1C:GRB10:RELN:LHFPL3:DLGAP2:BAI1:GLDC:GABBR2:KCNT1:KCNMA1:GRID1:BRSK2:KCNQ1:ABCC8:NELL2:TBX5:NPAS3:GABRA5:DOC2B:ALOX12B:ASIC2:CRHR1:CHAD:CACNA1G:DLL3:PTPRT:KCNK15:NTSR1:KCNQ2:B3GALT5	415	92	1.92755e-08	8.11144e-06	TP73:PTCHD2:IGSF21:EPHA8:RSPO1:COL9A2:AK5:NHLH2:BCAN:FAM163A:SYT2:WNT3A:SLC35F3:TRIM58:SH3RF3:DPP10:C1QL2:RAMP1:KLHL40:CACNA2D3:CLSTN2:GNB4:FGF12:ADRA2C:GABRA4:FGF5:CLGN:SLC9A3:FSTL4:CXCL14:PCDHAC2:RASGEF1C:GRM1:RELN:KCNH2:DLGAP2:GATA4:NEIL2:ANK1:GLDC:GABBR2:LMX1B:KCNT1:LHX3:CHAT:COL13A1:KCNMA1:SLIT1:PAX2:TCERG1L:BRSK2:SPON1:NELL1:NRXN2:ZBTB16:OAF:NELL2:TRHDE:WSCD2:TBX5:ATP8A2:NPAS3:GABRA5:PDE8A:…
11	Curated_gene_sets	LIM_MAMMARY_STEM_CELL_UP	439	49	2.23243e-05	0.00765087	PDPN:LUZP1:LGR6:KLHL29:OSBPL6:DOCK10:HDAC4:RARB:ITGA9:GNB4:PCDH7:SLIT3:COL23A1:ADAMTS2:QKI:IL6:TPST1:RELN:LEP:CALD1:RBPMS:NRG1:MTSS1:GSN:CCDC3:KCNMA1:PTPRE:ARHGAP20:PKNOX2:NTF3:YAF2:LIMA1:LRP1:DUSP6:ELK3:EID3:COL4A1:COL4A2:SNTB2:CDH13:NXN:NLGN2:GJC1:RNF165:LPHN1:PPP1R16B:PTPRT:CDH4:COL18A1	439	96	1.94658e-08	8.11144e-06	LUZP1:COL9A2:PRRX1:PTGS2:LGR6:AKT3:ANTXR1:TCF7L1:FBLN7:LIMS2:OSBPL6:COL5A2:NRP2:TNS1:HDAC4:ITGA9:PCBP4:PRICKLE2:FOXP1:VGLL3:MYLK:MBNL1:SCHIP1:GNB4:SH3TC1:PCDH7:SEMA5A:VCAN:CXCL14:PPP2R2B:SLIT3:PDLIM7:COL23A1:DST:PRDM1:AHI1:QKI:RELN:LAMB1:LEP:RBPMS:SULF1:MTSS1:MAMDC2:SVEP1:GSN:CCDC3:NRP1:EGR2:KCNMA1:SORBS1:SORCS1:PTPRE:EBF3:MICAL2:CCDC85B:MRGPRF:ARHGAP20:CADM1:TAGLN:NTF3:LIMA1:GRASP:LRP1:COL4A1:CO…
12	Curated_gene_sets	MANALO_HYPOXIA_UP	187	27	2.07457e-05	0.00765087	GJA5:PPARG:BCL6:SORBS2:MAST4:SYNPO:N4BP3:ATXN1:HLA-B:HIVEP2:RPS6KA2:ZHX2:MTSS1:CELF2:GDF10:CHST1:PTPRR:DUSP6:COL4A1:COL4A2:SMAD6:CDH2:KANK3:CYP4F11:PPP1R13L:HIF3A:COL18A1	187	43	4.47512e-05	0.0042744	SPSB1:PGM1:GJA5:NFASC:OPN3:TCF7L1:TNS1:PPARG:FILIP1L:TMEM45A:PLOD2:BCL6:AFAP1:LIMCH1:SORBS2:SYNPO:ATXN1:HLA-B:NOTCH4:COL9A1:ZNF292:HIVEP2:RPS6KA2:CLIP2:LAMB1:STC1:SLCO5A1:ZHX2:MTSS1:CELF2:GDF10:CHST15:USP47:PTPRR:COL4A1:COL4A2:CX3CL1:PLCG2:CDH2:AXL:PPP1R13L:DLGAP4:COL18A1
13	Curated_gene_sets	REACTOME_NEUREXINS_AND_NEUROLIGINS	50	12	3.04304e-05	0.00988228	SYT2:NRXN1:LRRTM4:DLGAP2:STXBP1:SYT12:LIN7A:SIPA1L1:NRXN3:NLGN2:DLGAP1:GRIN2D	50	23	5.32043e-09	3.14147e-06	SYT2:NRXN1:LRRTM4:PDLIM5:EPB41L2:GRM1:STX1A:DLGAP2:STXBP1:GRIN1:SYT7:NRXN2:SYT12:SHANK2:DLG2:SYT1:SIPA1L1:NRXN3:BEGAIN:NLGN2:DLGAP1:SHANK1:DLGAP4
14	Curated_gene_sets	MEISSNER_NPC_HCP_WITH_H3K4ME2	456	49	5.92704e-05	0.0160401	ALPL:AGBL4:LGR6:SLC35F3:ADCY3:DYSF:MARCH4:PRDM8:PRKG2:SLC12A7:TERT:FBXL21:PCDHAC1:SLIT3:CPLX2:N4BP3:COL23A1:GRIK2:AIG1:DPP6:VIPR2:MFHAS1:EBF2:FZD6:SEMA4D:CCDC3:KIAA1217:GAD2:GDF10:TLL2:CPXM2:PTPRE:BRSK2:SRRM4:DLK1:OTUD7A:RBFOX1:DOC2A:ABR:ITGB3:CACNA1G:EMILIN2:MYO5B:MBP:PPAP2C:DLL3:GRIN2D:UCKL1:COL18A1	456	85	8.68479e-05	0.00723176	VWA1:AGBL4:TTC39A:SLC44A5:LGR6:SERTAD4:SLC35F3:ADCY3:MARCH4:LHFPL4:HRH1:FBLN2:PRICKLE2:RAB43:FGF12:PRDM8:PRKG2:PCDHAC1:SLIT3:NSD1:COL23A1:RNF144B:LMTK2:DPP6:VIPR2:PLEKHA2:ANK1:SLCO5A1:FZD6:SEMA4D:LMX1B:DNM1:OLFM1:CACNA1B:NET1:CCDC3:KIAA1217:GDF10:TLL2:CPXM2:PTPRE:TCERG1L:BRSK2:KCNJ8:PKP2:SMAGP:RASAL1:SRRM4:GLT1D1:SMAD9:DNAJC15:GRTP1:DLK1:OTUD7A:ANXA2:DAPK2:PDE8A:ALDH1A3:DOC2A:FA2H:ADAMTS18:IRF8:A…
15	Curated_gene_sets	REACTOME_REGULATION_OF_COMMISSURAL_AXON_PATHFINDING_BY_SLIT_AND_ROBO	10	5	0.000152283	0.0353242	ROBO1:SLIT3:NELL2:NTN1:DCC	10	6	0.000501774	0.0217533	ROBO2:SLIT3:SLIT1:ROBO3:NELL2:NTN1
16	Curated_gene_sets	MIKKELSEN_NPC_HCP_WITH_H3K27ME3	327	37	0.00016501	0.0369564	TNFRSF1B:IGSF21:EPHA8:LHX8:SYT2:RYR2:KCNS3:ALK:DPP10:NXPH2:PTPRN:SGPP2:ADRA2C:PPP2R2C:RASGEF1C:COBL:DLGAP2:BAI1:CRTAC1:IGF2:KCNQ1:TMEM151A:SYT12:DSCAML1:HOXC8:GABRA5:GABRG3:SCNN1G:CDH8:VAT1L:IKZF3:CRHR1:B4GALNT2:CA10:PTPRT:KCNQ2:SOX18	327	73	4.14685e-07	8.95176e-05	PRKCZ:PRDM16:TP73:TNFRSF1B:IGSF21:PAX7:EPHA8:GRIK3:RSPO1:LHX8:GFI1:SYT2:WNT3A:PGBD5:KCNS3:ALK:MAL:DPP10:C1QL2:GALNT13:HOXD10:SGPP2:CLSTN2:ADRA2C:PPP2R2C:FAM47E-STBD1:FSTL4:CXCL14:RASGEF1C:TFAP2D:COBL:DLGAP2:PAPPA:GRIN1:CHAT:COL13A1:SORCS3:VWA2:TCERG1L:IGF2:NELL1:SYT12:DSCAML1:HOXC8:FOXN4:FGF14:GABRA5:GABRG3:SCNN1G:CDH8:CA7:PITPNM3:RAB11FIP4:IKZF3:CRHR1:IGF2BP1:CA10:LLGL2:RBFOX3:COLEC12:ST8SIA3:HC…
17	Curated_gene_sets	REACTOME_NEURONAL_SYSTEM	373	57	7.2897e-11	2.36733e-07	SLC1A7:KCNN3:CACNA1E:SYT2:KCNS3:ADCY3:NRXN1:LRRTM4:CACNA2D3:ADCY5:KCNAB1:KCNMB2:KCNMB3:GNB4:GABRA4:GRIA2:RASGRF2:CAMK4:GLRA1:GABRA6:LRFN2:KCNQ5:GRIK2:RPS6KA2:PRKAG2:DLGAP2:NRG1:KCNB2:PTPRD:GABBR2:STXBP1:GAD2:KCNMA1:KCNQ1:PPFIBP2:ABCC8:SYT12:SLC38A2:LIN7A:ADCY4:KCNH5:SIPA1L1:NRXN3:GABRB3:GABRA5:GABRG3:NPTN:RASGRF1:NLGN2:GJC1:PPM1E:PRKCA:DLGAP1:LRFN3:GRIN2D:PLCB1:KCNQ2	373	85	1.77937e-08	8.11144e-06	GRIK3:KCNN3:SYT2:GNG4:KCNS3:ADCY3:NRXN1:LRRTM4:KCNH7:CHRNA1:ERBB4:PRKAG3:CHRND:CHRNG:CACNA2D3:KCNMB2:KCNMB3:GNB4:GABRA4:GABRB1:PDLIM5:ADCY2:RASGRF2:GABRA6:GABBR1:LRFN2:KCNQ5:MYO6:EPB41L2:GRM1:RPS6KA2:PRKAR1B:STX1A:KCNH2:DLGAP2:CHRNA2:KCNK9:PTPRD:GABBR2:STXBP1:GRIN1:CACNA1B:CHAT:KCNMA1:SYT7:NRXN2:SYT12:SHANK2:DLG2:SLC6A12:KCNJ8:PPFIBP1:TUBA1B:KCNH3:SYT1:PPFIA2:ADCY4:SIPA1L1:NRXN3:BEGAIN:GABRB3:GAB…
18	Curated_gene_sets	ACEVEDO_METHYLATED_IN_LIVER_CANCER_DN	698	76	3.52332e-07	0.000208036	AJAP1:TNFRSF8:EPHA8:LUZP1:EPHA10:MSTO1:OR10K1:RGS13:KIF26B:OR2L13:MYT1L:SLC8A1:KIF5C:HOXD13:NUP35:OR6B3:CLASP2:KCNMB2:MUC4:PPP2R2C:CLNK:ANK2:NPY2R:ASB5:SLC6A19:SLC6A18:EGFLAM:PCDHA11:PCDHA13:PCDHGA2:HMGXB3:TENM2:SH3PXD2B:CPLX2:N4BP3:RASGEF1C:DPCR1:GRIK2:TIAM2:PARK2:SDK1:HOXA4:PLXNA4:DPP6:PTPRN2:VIPR2:DLGAP2:SLC20A2:SLC45A4:ASTN2:ZNF438:CCDC7:C10ORF68:GDF10:TET1:GRID1:CRTAC1:PDZD8:CPXM2:PTPRE:ABCC…	698	131	8.22578e-07	0.000148407	AJAP1:CAMTA1:TNFRSF8:EPHA8:LUZP1:MKNK1:GLIS1:AK5:LOR:OR10K1:RGS13:NAV1:NFASC:TMCC2:WDR26:OBSCN:DISC1:OR2L13:TPO:SLC3A1:ZAP70:KIF5C:HOXD13:OR6B2:HRH1:FGD5:FOXP1:CD86:KALRN:NMNAT3:CLSTN2:TRIM42:SSR3:KCNMB2:DGKG:MUC4:JAKMIP1:PPP2R2C:LIMCH1:NPFFR2:TSPAN5:ANK2:FAM160A1:DCHS2:GALNT7:ASB5:SLC6A19:SLC6A18:EGFLAM:FYB:MCC:PKD2L2:PCDHA11:PCDHA13:PCDHGA2:TENM2:RASGEF1C:F13A1:COL9A1:FILIP1:FHL5:FYN:AHI1:ADGB:…
19	Curated_gene_sets	GRYDER_PAX3FOXO1_ENHANCERS_IN_TADS	942	93	1.45077e-06	0.00078523	RERE:ARID1A:SDC3:RRAGC:BCAR3:DNTTIP2:KCNN3:ATF6:ENAH:GALNT2:KCNS3:KLHL29:ALK:CDC42EP3:ST6GAL2:CUL3:DOCK10:AGAP1:SUMF1:MAGI1:IGF2BP2:TBC1D1:PITX2:ANK2:KIAA0922:SPOCK3:RGMB:SPDL1:RANBP17:N4BP3:FARS2:ATXN1:RPF2:EYA4:SNX9:QKI:SDK1:WIPI2:GRB10:COBL:TPST1:POR:KIAA1324L:CDK6:DNAJB6:VIPR2:NRG1:PTPRD:PRUNE2:DAPK1:ASTN2:ASS1:CELF2:CCDC3:KIAA1217:KIF5B:PARD3:SGMS1:KCNMA1:NOC3L:FAM160B1:FGFR2:IGF2:EXT2:PKNOX…	942	170	2.84121e-07	6.59059e-05	RERE:ARID1A:RRAGC:FAF1:PGM1:DNTTIP2:PTGFRN:KCNN3:PIGC:NAV1:RRP15:ENAH:GALNT2:PGBD5:KCNS3:HS1BP3:NCOA1:WDR43:ALK:MSH6:VAX2:TCF7L1:ATOH8:ST6GAL2:ZEB2:SATB2:NRP2:CUL3:AGAP1:LRRFIP1:SUMF1:LMCD1:LRRFIP2:LIMD1:FOXP1:VGLL3:PHLDB2:TAGLN3:XRN1:IGF2BP2:AFAP1:TBC1D1:APBB2:LIMCH1:ANTXR2:WDFY3:ANK2:PGRMC2:SPOCK3:NDUFS4:SLC38A9:MSH3:RGMB:MAN2A1:MCC:H2AFY:ADAM19:SPDL1:NPM1:CDYL:FARS2:JARID2:ATXN1:ZFAND3:ASCC3:R…
20	Curated_gene_sets	ACEVEDO_LIVER_CANCER_WITH_H3K27ME3_DN	148	25	2.51662e-06	0.00125734	RAPGEF4:PP2D1:PCDHGB3:PCDHGA6:PCDHGA7:PCDHGB4:PCDHGA8:PCDHGA9:PCDHGB6:PCDHGA10:PCDHGB7:PCDHGA11:CPLX2:GRIK2:USH1C:OR5D14:OR5L2:TMEM132C:OR4K2:COCH:TTC9:RBFOX1:PPP1R16B:COL18A1:APOL2	148	32	0.001218	0.0425318	IGSF3:LYST:RAPGEF4:SATB2:PP2D1:GP5:PCDHGB3:PCDHGA6:PCDHGA7:PCDHGB4:PCDHGA8:PCDHGA9:PCDHGB6:PCDHGA10:PCDHGB7:PCDHGA11:KCNIP1:CDKN2A:CHST15:NUCB2:TMEM132C:ATP8A2:COCH:TTC9:ADAMTSL3:NTRK3:ANKRD29:DTNA:PPP1R16B:TSHZ2:COL18A1:APOL2
21	Curated_gene_sets	REACTOME_PROTEIN_PROTEIN_INTERACTIONS_AT_SYNAPSES	76	16	9.30678e-06	0.00377797	SYT2:NRXN1:LRRTM4:LRFN2:DLGAP2:PTPRD:STXBP1:PPFIBP2:SYT12:LIN7A:SIPA1L1:NRXN3:NLGN2:DLGAP1:LRFN3:GRIN2D	76	30	2.44687e-09	1.58924e-06	SYT2:NRXN1:LRRTM4:PDLIM5:LRFN2:EPB41L2:GRM1:STX1A:DLGAP2:PTPRD:STXBP1:GRIN1:SYT7:NRXN2:SYT12:SHANK2:DLG2:PPFIBP1:SYT1:PPFIA2:SIPA1L1:NRXN3:BEGAIN:NTRK3:NLGN2:DLGAP1:PTPRS:PPFIA3:SHANK1:DLGAP4
22	Curated_gene_sets	DAVICIONI_MOLECULAR_ARMS_VS_ERMS_UP	308	37	4.74323e-05	0.0140033	KCNN3:ALK:CDC42EP3:PKP4:RAPGEF4:CUL3:CLASP2:ADRA2C:ANK2:KIAA0922:NNT:COBL:POR:MAGI2:VIPR2:DLGAP2:KDM4C:PTPRD:GNE:PAX5:DAPK1:LPPR1:ASTN2:ASS1:SGMS1:ADK:FGFR2:MED13L:DOCK9:ARPP19:WWOX:FAM64A:TTC19:MEOX1:TEX2:PIGN:COL18A1	308	64	2.40957e-05	0.00274564	KCNN3:PGBD5:DISC1:AKT3:NCOA1:ALK:PKP4:RAPGEF4:SATB2:KLF7:CUL3:LRRFIP2:CD47:TAGLN3:ADRA2C:QDPR:ANK2:SEMA5A:NNT:CCNH:CDYL:TFAP2A:JARID2:DST:ASCC3:PCMT1:ELMO1:COBL:POR:MAGI2:VIPR2:DLGAP2:CHD7:KDM4C:PTPRD:GNE:PAX5:DAPK1:CDC14B:LPPR1:ASTN2:NOTCH1:NET1:SGMS1:ADK:PAX2:ADRA2A:FGFR2:NELL1:DOCK9:SAMD4A:SYNE2:GREM1:RYR3:MYO1E:NTRK3:WWOX:FAM64A:TTC19:TEX2:BLCAP:EYA2:ABCG1:COL18A1
23	Curated_gene_sets	REACTOME_TRANSMISSION_ACROSS_CHEMICAL_SYNAPSES	241	31	5.29787e-05	0.0149607	SLC1A7:CACNA1E:ADCY3:CACNA2D3:ADCY5:GNB4:GABRA4:GRIA2:RASGRF2:CAMK4:GLRA1:GABRA6:GRIK2:RPS6KA2:PRKAG2:NRG1:GABBR2:STXBP1:GAD2:SLC38A2:LIN7A:ADCY4:GABRB3:GABRA5:GABRG3:NPTN:RASGRF1:PPM1E:PRKCA:GRIN2D:PLCB1	241	48	0.000646994	0.025889	GRIK3:GNG4:ADCY3:CHRNA1:ERBB4:PRKAG3:CHRND:CHRNG:CACNA2D3:GNB4:GABRA4:GABRB1:ADCY2:RASGRF2:GABRA6:GABBR1:MYO6:RPS6KA2:PRKAR1B:STX1A:CHRNA2:GABBR2:STXBP1:GRIN1:CACNA1B:CHAT:DLG2:SLC6A12:TUBA1B:SYT1:PPFIA2:ADCY4:GABRB3:GABRA5:GABRG3:GIT1:PPM1E:PRKCA:GNG7:PPFIA3:PRKCG:CACNG8:PLCB1:CHRNA4:GRIK1:COMT:SYN3:CACNG2
24	Curated_gene_sets	DAWSON_METHYLATED_IN_LYMPHOMA_TCL1	55	12	8.32337e-05	0.0216241	AJAP1:KLHL29:PKP4:STK39:HOXD13:OSBPL6:CLVS2:SOGA3:SOGA3:KIAA0408:TMEM229A:PTPRD:MDGA2:MDGA2:MACROD2	55	16	0.000811557	0.0310063	AJAP1:PKP4:STK39:HOXD13:OSBPL6:PCDH10:NRSN1:CLVS2:AUTS2:TMEM229A:RUNX1T1:PTPRD:CDKN2A:EGR2:MDGA2:MDGA2:MACROD2

## Sheet: Supplementary Table 6
No.	Category	GeneSet	N_genes	N_overlap	p	adjP	genes
1	Hallmark_gene_sets	HALLMARK_KRAS_SIGNALING_DN	184	26	4.27049e-05	0.00213524	EDN2:RYR2:ABCB11:PDE6B:ADRA2C:SYNPO:TENM2:PROP1:SGK1:PARK2:SLC29A3:CPEB3:CALCB:PTPRJ:NTF3:GPR19:ACTC1:ALOX12B:MYO15A:DCC:FGF22:ATP4A:RYR1:ZNF112:KLK8:KCNQ2
2	Curated_gene_sets	MIKKELSEN_ES_HCP_WITH_H3K27ME3	39	13	2.35137e-07	0.000154653	CACNA1E:HOXD4:PHOX2B:PRDM8:PCDHA2:PCDHA3:PCDHA12:PCDHB7:PCDHB15:NTM:TBX5:ALOX12B:DCC:NETO1
3	Curated_gene_sets	GRESHOCK_CANCER_COPY_NUMBER_UP	309	38	2.23813e-05	0.00765087	RPL22:LCK:STIL:EPS15:ABL2:ALK:MSH2:PAX8:HOXD13:PPARG:XPC:MECOM:BCL6:PHOX2B:RANBP17:ROS1:CDK6:FANCG:PAX5:TET1:SUFU:FGFR2:LMO2:EXT2:MEN1:ARHGEF12:HOXC11:ERCC5:RAD51B:FANCA:SPECC1:RARA:BRCA1:HLF:CLTC:ZNF331:GNAS:CLTCL1
4	Curated_gene_sets	RODRIGUES_THYROID_CARCINOMA_DN	67	14	3.63885e-05	0.0112544	CDC42EP3:PAX8:MAP2:ANKRD28:ROBO1:BBX:IGF2BP2:ATXN1:HIVEP2:AIG1:CDK6:KCNMA1:PPP1R13L:PLCB1
5	Curated_gene_sets	KEGG_NEUROACTIVE_LIGAND_RECEPTOR_INTERACTION	248	31	9.10572e-05	0.0227468	ADRA2C:GABRA4:NPY2R:GRIA2:GLRA1:GABRA6:MCHR2:GRIK2:NMBR:OPRM1:LEP:CHRM2:VIPR2:GABBR2:PARD3:GRID1:APLNR:CHRM1:GPR83:LTB4R2:LTB4R2:LTB4R:PTGDR:BDKRB2:GABRB3:GABRA5:GABRG3:CRHR1:MC2R:S1PR2:GRIN2D:NTSR1
6	Curated_gene_sets	REACTOME_NEUROTRANSMITTER_RECEPTORS_AND_POSTSYNAPTIC_SIGNAL_TRANSMISSION	182	25	9.48935e-05	0.0228272	ADCY3:ADCY5:GNB4:GABRA4:GRIA2:RASGRF2:CAMK4:GLRA1:GABRA6:GRIK2:RPS6KA2:PRKAG2:NRG1:GABBR2:LIN7A:ADCY4:GABRB3:GABRA5:GABRG3:NPTN:RASGRF1:PPM1E:PRKCA:GRIN2D:PLCB1

## Sheet: Supplementary Table 7
No.	Category	GeneSet	N_genes	N_overlap	p	adjP	genes
1	Curated_gene_sets	DACOSTA_UV_RESPONSE_VIA_ERCC3_DN	816	175	1.54326e-13	1.00234e-09	PEX14:ID3:STIL:ZFYVE9:ROR1:ZZZ3:DPYD:KIFAP3:RABGAP1L:RGL1:RGS7:ROCK2:PUM2:NCOA1:WDR43:LRPPRC:MSH2:MSH6:PSME4:EHBP1:R3HDM1:ZEB2:KIF5C:PKP4:BAZ2B:STK39:TLK1:SLC25A12:COL5A2:SATB2:KLF7:TRIP12:AGAP1:LRRFIP1:HDAC4:ANKRD28:UBE2E1:TRAK1:WNT5A:MITF:FILIP1L:BBX:ZBTB20:ZNF148:PLOD2:WWTR1:MBNL1:SCHIP1:FAM193A:AFAP1:APBB2:POLR2B:FGF5:WDFY3:PDLIM5:TSPAN5:ABCE1:SEMA5A:MAP1B:MSH3:RASA1:FAM172A:TTC37:MAN2A1:NREP…
2	Curated_gene_sets	GOBERT_OLIGODENDROCYTE_DIFFERENTIATION_DN	988	196	1.0581e-11	1.7181e-08	ICMT:SPSB1:EFCAB7:PDE4B:WLS:MLLT11:RUSC1:RABGAP1L:TNR:ASTN1:NAV1:SOX13:NFASC:TMCC2:AKT3:LTBP1:QPCT:RTN4:EHBP1:TCF7L1:LIMS2:WDR33:SFT2D3:ZEB2:PKP4:BAZ2B:TMEFF2:PLEKHM3:TNS1:WDFY1:COL6A3:MYEOV2:SNED1:RAD18:ANKRD28:NISCH:FOXP1:PHLDB2:ZBTB20:LSAMP:IGSF11:MYLK:KALRN:TMEM108:AMOTL2:XRN1:GNB4:SOX2-OT:FAM193A:TBC1D14:AFAP1:HS3ST1:PCDH7:IGFBP7:ANTXR2:LIN54:CASP6:ZFR:ELOVL7:MAP1B:NREP:PCDHB4:PPP2R2B:SYNPO:…
3	Curated_gene_sets	LIU_OVARIAN_CANCER_TUMORS_AND_XENOGRAFTS_XDGS_DN	1430	254	1.24465e-09	1.15486e-06	VWA1:SLC2A5:TNFRSF8:TNFRSF1B:CLIC4:FGR:LCK:CSMD2:GRIK3:PDE4B:PTGER3:AK5:GBP2:DPYD:SELP:PRRX1:ASTN1:RGL1:PTGS2:KCNT2:CHI3L1:NFASC:GNG4:NID1:AKT3:KCNS3:NLRC4:QPCT:ANTXR1:TGFA:CD8A:SH3RF3:ZEB2:GALNT5:SCN9A:DHRS9:CHRNA1:HOXD10:OSBPL6:FAM171B:COL5A2:HECW2:SATB2:NRP2:COL6A3:RAMP1:FGD5:GALNT15:RBMS3:WNT5A:CADPS:PRICKLE2:CNTN3:ROBO2:VGLL3:FILIP1L:PHLDB2:CD86:SLCO2A1:PLOD2:GNB4:PPP2R2C:HS3ST1:LDB2:RHOH:CO…
4	Curated_gene_sets	LIU_PROSTATE_CANCER_DN	438	99	1.91111e-09	1.37918e-06	PEX14:CLIC4:GLIS1:CACHD1:GBP2:PRRX1:ENAH:LYST:NID1:GRHL1:LTBP1:PLEKHH2:SLC25A12:HOXD13:HOXD10:TNS1:SGPP2:FGD5:GPD1L:ITGA9:ZBTB47:ACOX2:PRICKLE2:LSAMP:MYLK:RBP1:MUC4:MFI2:PCDH7:TBC1D1:ANK2:STOX2:SORBS2:UBE2QL1:SNORD123:NNT:PIK3R1:MAP1B:GALNT10:NEURL1B:DST:COL9A1:FYN:LAMA4:ECHDC1:EYA4:SEMA3E:LAMB1:CAV2:CTSB:CLU:RBPMS:PLEKHA2:STOM:PTGDS:ITIH5:OPTN:ITGA8:COL13A1:PLAU:VCL:KCNMA1:SORBS1:SH3PXD2A:FGFR2:…
5	Curated_gene_sets	NABA_CORE_MATRISOME	254	64	1.9982e-08	8.11144e-06	VWA1:RSPO1:COL9A2:THBS3:BCAN:TNR:NID1:LTBP1:FBLN7:COL5A2:IGFBP5:COL6A3:SNED1:FBLN2:IGSF10:IGFBP7:SPARCL1:SPOCK3:EGFLAM:VCAN:HAPLN1:EDIL3:FBN2:SLIT3:COL23A1:TNXB:COL11A2:COL21A1:EYS:COL9A1:LAMA4:COL10A1:SMOC2:VWDE:IGFBP1:RELN:LAMB1:LAMB4:RSPO2:SVEP1:COL13A1:SLIT1:TECTB:VWA2:DMBT1:SPON1:NELL1:MGP:NELL2:LUM:DCN:COL4A1:COL4A2:COCH:NID2:THSD4:ZP2:NTN1:NCAN:COL9A3:COL20A1:COL18A1:COL6A1:CHADL
6	Curated_gene_sets	SCHAEFFER_PROSTATE_DEVELOPMENT_48HR_DN	372	85	1.56141e-08	8.11144e-06	RSPO1:CACHD1:PTGER3:SLC19A2:KIFAP3:PRRX1:QPCT:ANTXR1:DPP10:PKP4:FAM171B:ABI2:NRP2:KLF7:HDAC4:RBMS3:CACNA2D3:FOXP1:ROBO2:FILIP1L:PEX5L:LDB2:GABRA4:GABRB1:EPHA5:SPARCL1:PCDH10:EDIL3:PDLIM7:GFOD1:CD83:FAM8A1:HLA-G:LRFN2:PTCHD4:REV3L:HIVEP2:TIAM2:AHR:AMPH:CTTNBP2:CTSB:SULF1:RUNX1T1:STK3:RSPO2:KCNK9:NAPRT1:PAPPA:RALGDS:FAM107B:SUFU:CPXM2:LHPP:EBF3:TCERG1L:GPR123:FIBIN:TSPAN18:MRGPRF:ARHGAP42:UBASH3B:E…
7	Curated_gene_sets	REACTOME_EXTRACELLULAR_MATRIX_ORGANIZATION	284	69	2.75631e-08	9.99322e-06	COL9A2:BCAN:TNR:CAPN9:NID1:LTBP1:NRXN1:LOXL3:COL5A2:COL6A3:FBLN2:CAPN7:ITGA9:CD47:ITGB5:PLOD2:ADAMTS3:SPOCK3:VCAN:HAPLN1:FBN2:ADAM19:COL23A1:TNXB:COL11A2:COL21A1:DST:COL9A1:LAMA4:COL10A1:LAMB1:CTSB:MUSK:ITGA8:COL13A1:TLL2:SH3PXD2A:ADAM12:CD151:ITGB7:LUM:DCN:COL4A1:COL4A2:NID2:PPIB:LOXL1:FURIN:ADAMTS18:ITGAE:ITGA2B:ITGB3:PRKCA:ITGB4:TIMP2:PTPRS:ICAM1:ICAM4:ICAM5:NCAN:GDF5:BMP7:COL9A3:COL20A1:APP:A…
8	Curated_gene_sets	DACOSTA_UV_RESPONSE_VIA_ERCC3_COMMON_DN	442	96	2.76948e-08	9.99322e-06	STIL:ZFYVE9:ZZZ3:DPYD:RGS7:ROCK2:PUM2:NCOA1:WDR43:LRPPRC:MSH2:EHBP1:R3HDM1:KIF5C:PKP4:BAZ2B:STK39:TLK1:COL5A2:SATB2:KLF7:TRIP12:AGAP1:TRAK1:WNT5A:FILIP1L:BBX:ZNF148:MBNL1:SCHIP1:AFAP1:LIMCH1:FGF5:TSPAN5:SEMA5A:MAP1B:RASA1:MAN2A1:NREP:CDYL:FARS2:JARID2:CAP2:DST:ZNF292:ASCC3:REV3L:FYN:HIVEP2:PCMT1:QKI:MPP6:CDK13:PTPN12:TRRAP:CUX1:MKLN1:CUL1:DLC1:STAU2:STK3:UBR5:ZHX2:PTK2:SMARCA2:DAPK1:RABGAP1:ZMYND…
9	Curated_gene_sets	RIGGI_EWING_SARCOMA_PROGENITOR_DN	186	51	2.92428e-08	9.99644e-06	SLC2A5:PDE4B:WLS:PTGFR:DPYD:PRRX1:CHI3L1:RRM2:NRP2:LRRFIP1:GALNT15:VEPH1:MFI2:CLGN:ANXA10:VCAN:NREP:EBF1:SLIT3:GFPT2:RUNX2:LAMA4:COL10A1:PDE7B:RPS6KA2:GSAP:HGF:PTN:PSD3:CSGALNACT1:STC1:CLU:SVEP1:NRP1:CXCL12:BICC1:ADAM12:IGF2:SPON1:FIBIN:MRGPRF:SRGAP1:LUM:DCN:KCTD4:ALDH1A3:ADORA2B:PIEZO2:NEDD4L:PLCB1:GDF5
10	Curated_gene_sets	LINDGREN_BLADDER_CANCER_HIGH_RECURRENCE	47	21	4.63611e-08	1.50558e-05	UBR4:RHBG:PRRX1:COL5A2:NRP2:MYLK:VCAN:ADAM19:FYN:LAMA4:PAPPA:MICAL2:NAV2:MGP:NR4A1:COL4A2:NID2:CD97:MYADM:MYL9:COL18A1
11	Curated_gene_sets	CUI_TCF21_TARGETS_2_DN	778	147	1.1442e-07	3.0965e-05	AKIRIN1:PDE4B:RABGAP1L:CDC73:TMCC2:LYST:NID1:PUM2:INPP4A:ZEB2:TANC1:RAPGEF4:HECW2:CFLAR:WDFY1:LRRFIP1:FGD5:ITGA9:PTPRG:VGLL3:BBX:CD47:ITGB5:SLCO2A1:PLOD2:GYG1:WWTR1:MED12L:SCHIP1:LDB2:TBC1D1:APBB2:GABRA4:LIN54:TSPAN5:LRBA:SEMA5A:ANKRD33B:ZFR:SLC38A9:LNPEP:MCC:SYNPO:IRGM:GALNT10:EBF1:TENM2:SERPINB6:CDYL:RANBP9:JARID2:DCDC2:NOTCH4:DST:MYO6:PRDM1:FYN:TCF21:SGK1:HIVEP2:QKI:GPR146:RAPGEF5:PRR15:GGCT:P…
12	Curated_gene_sets	REACTOME_ECM_PROTEOGLYCANS	71	26	1.67609e-07	4.35449e-05	COL9A2:BCAN:TNR:COL5A2:COL6A3:ITGA9:ITGB5:VCAN:HAPLN1:TNXB:COL9A1:LAMA4:LAMB1:MUSK:ITGA8:LUM:DCN:COL4A1:COL4A2:ITGA2B:ITGB3:PTPRS:NCAN:COL9A3:APP:COL6A1
13	Curated_gene_sets	PEREZ_TP53_TARGETS	1059	188	2.14841e-07	5.36689e-05	VWA1:MMEL1:TP73:ZBTB48:CAMTA1:ESPNP:ECE1:LUZP1:LDLRAP1:CNKSR1:GRIK3:EDN2:ZYG11B:WDR47:FAM46C:ANXA9:TMCC2:CNIH4:OBSCN:GREB1:CNNM4:ZAP70:INPP4A:MFSD9:HOXD10:COL5A2:CFLAR:PLEKHM3:TNS1:AGAP1:FGD5:ITGA9:TRAK1:LIMD1:LTF:ZBTB20:KALRN:ZXDC:MBNL1:TBC1D14:SH3TC1:GABRA4:ABCG2:CASP6:STOX2:SORBS2:UBE2QL1:EGFLAM:VCAN:MCC:ALDH7A1:CXCL14:KLHL3:NRG2:GALNT10:NIPAL4:MAML1:RNF144B:TRIM26:HLA-DMB:ETV7:POLH:COL21A1:MY…
14	Curated_gene_sets	RODRIGUES_THYROID_CARCINOMA_POORLY_DIFFERENTIATED_DN	717	136	2.73324e-07	6.57496e-05	RERE:ZNF362:GPBP1L1:CACHD1:DCAF8:DCAF8:MARC2:OPN3:AKT3:TTC7A:PAPOLG:WDPCP:PCYOX1:REV1:ST6GAL2:ZEB2:PKP4:CFLAR:ABI2:FZD5:TNS1:SGPP2:CUL3:LRRFIP1:SNED1:VGLL4:MRPS25:ANKRD28:RBMS3:GPD1L:TRAK1:LIMD1:PTPRG:PRICKLE2:FOXP1:BBX:CD47:ZBTB20:NDUFB4:MYLK:MBNL1:PROM1:TBC1D1:APBB2:LIMCH1:SCD5:CDS1:PDLIM5:TSPAN5:CASP6:SORBS2:MRPS30:ZBED3:GALNT10:NSD1:ATXN1:RNF144B:LAMA4:SGK1:HIVEP2:EPM2A:TIAM2:ARID1B:SYNJ2:RAP…
15	Curated_gene_sets	WONG_ADULT_TISSUE_STEM_MODULE	667	128	3.19394e-07	7.15333e-05	CLIC4:MPL:PTGER3:GBP2:SELP:ASTN1:PTGS2:NAV1:CR2:IRF6:ENAH:NID1:LTBP1:IGFBP5:LRRFIP1:FBLN2:MITF:FOXP1:PHLDB2:TAGLN3:ZBTB20:MYLK:ITGB5:ESYT3:RBP1:IGSF10:DGKG:MUC4:SORCS2:UGDH:LIMCH1:REST:IGFBP7:EPHA5:FAM47E-STBD1:ANTXR2:ABCG2:PRDM5:IL15:NR2F1:NREP:CXCL14:SYNPO:IRGM:TENM2:GABBR1:HLA-DMA:DST:SENP6:FYN:SMOC2:PTPN12:MAGI2:SEMA3E:ABCB1:RELN:KMT2E:LAMB1:MDFIC:PTN:DLC1:RBPMS:SMARCA2:STXBP1:ZMYND11:DIP2C:I…
16	Curated_gene_sets	DODD_NASOPHARYNGEAL_CARCINOMA_UP	1525	254	4.27259e-07	8.95176e-05	PRKCZ:MMEL1:RERE:LDLRAP1:CNKSR1:MTF1:ZMYND12:MPL:ZSWIM5:AGBL4:WLS:ANXA9:RPTN:BCAN:ANKRD45:RGS8:PLEKHA6:CR2:SERTAD4:WDR26:CAPN9:EFCAB2:TPO:FKBP1B:TTC7A:MAL:FBLN7:GALNT5:CCDC148:DHRS9:OSBPL6:MARCH4:TNS1:LRRFIP1:ANKMY1:SNED1:CHL1:PPARG:OSBPL10:GPD1L:TRAK1:LTF:USP4:TEX264:PRKCD:FAM3D:FOXP1:HHLA2:KIAA2018:KALRN:CCDC37:RAB43:AMOTL2:IL20RB:KCNMB2:BCL6:MUC4:STX18:CC2D2A:PROM1:CWH43:CDS1:ADH6:ADH1C:TTC29:…
17	Curated_gene_sets	CREIGHTON_ENDOCRINE_THERAPY_RESISTANCE_5	437	91	4.672e-07	9.4827e-05	LDLRAP1:WLS:FAM73A:IGSF3:PTGFRN:MARC2:CAPN9:SMYD3:FAM110C:NCOA1:INPP4A:ORMDL1:KLF7:FZD5:ERBB4:CTNNB1:TRAK1:PRICKLE2:FOXP1:PHLDB2:ZBTB20:MBNL1:FGF12:FAM114A1:UGDH:LIMCH1:CDS1:GALNT7:CTNND2:MTMR12:GALNT10:RNF144B:FILIP1:FUT9:EPB41L2:LRP11:SYNJ2:QKI:MAFK:LFNG:NXPH1:AHR:FBXO25:MTUS1:PSD3:CPNE3:PLEKHF2:SPAG1:TTC39B:FBP1:GABBR2:GSN:STOM:NET1:SFMBT2:NEBL:ANK3:KCNMA1:FAM160B1:INPP5A:SWAP70:PLEKHA7:NUCB2:…
18	Curated_gene_sets	REACTOME_SIGNALING_BY_RECEPTOR_TYROSINE_KINASES	495	100	5.7242e-07	0.000112663	PRKCZ:ID3:LCK:COL9A2:MKNK1:THBS3:AKT3:ROCK2:ALK:TGFA:STAM2:COL5A2:ABI2:NRP2:ERBB4:COL6A3:CTNNB1:MAPKAPK3:PRKCD:KLB:GABRB1:REST:POLR2B:FGF5:PIK3R1:RASA1:FER:NRG2:RANBP9:COL11A2:MAPK14:COL9A1:PRDM1:FYN:LAMA4:SGK1:RPS6KA2:ELMO1:PTPN12:HGF:LAMB1:PTPRZ1:PTN:PLAT:WWP1:PTK2:DNM1:RALGDS:NRP1:CXCL12:EGR2:FGFR2:ADAM12:DOCK1:IGF2:PTPRJ:CTNND1:TCIRG1:GAB2:CUL5:CBL:NTF3:PTPRO:FRS2:FGF9:FLT1:GTF2F2:IRS2:COL4A1…
19	Curated_gene_sets	CHARAFE_BREAST_CANCER_LUMINAL_VS_MESENCHYMAL_DN	434	90	6.51403e-07	0.000124437	LUZP1:STIL:ZYG11B:WLS:AK5:DPYD:NMNAT2:PTGS2:NAV1:GALNT2:AKT3:RTN4:EHBP1:ANTXR1:COL6A3:ASB1:HRH1:ANKRD28:RBMS3:CMTM7:PTPRG:PHLDB2:MYLK:WWTR1:IGF2BP2:TBC1D1:IGFBP7:ANTXR2:IL15:ANKRD33B:MAP1B:EDIL3:NR2F1:FER:PTTG1:SPDL1:GFPT2:SERPINB1:RNF182:RUNX2:ECHDC1:EPB41L2:EYA4:SGK1:PDE7B:QKI:FSCN1:DPY19L1:CLIP2:LAMB1:MDFIC:CAV2:PLAT:GLIS3:PAPPA:DNM1:NRP1:BICC1:COL13A1:PLAU:VCL:PRKCDBP:PARVA:TEAD1:PICALM:UBASH…
20	Curated_gene_sets	HATADA_METHYLATED_IN_LUNG_CANCER_UP	350	76	7.64382e-07	0.000141847	AJAP1:LCK:FAF1:NHLH2:DTNB:MAL:ST6GAL2:CNTNAP5:KCNH7:RAPGEF4:HOXD13:GALNT15:ZBTB47:AMIGO3:GMPPB:CADPS:TF:PROM1:EPHA5:PRDM8:ANK2:PRRC1:PCDHGA3:PCDHGB2:CANX:GFPT2:TFAP2A:GFOD1:ETV7:POLH:ECHDC1:TCF21:AHI1:HOXA7:TBX20:HTR5A:CSMD1:DLC1:NEFM:PLEKHF2:RSPO2:FBP1:OLFM1:SPAG6:CXCL12:TLL2:SUFU:LHPP:LSP1:RIC3:NELL1:TAGLN:CACNA1C:KRT72:TMED2:ATP8A2:CIDEB:NID2:BEGAIN:RYR3:IL16:TMEM204:CA7:DPEP3:CDH13:GP1BA:SLC4…
21	Curated_gene_sets	NABA_MATRISOME	947	166	2.48525e-06	0.000436261	VWA1:FCN3:RSPO1:COL9A2:ANXA9:RPTN:THBS3:SEMA4A:BCAN:TNR:F13B:WNT3A:NID1:TPO:COLEC11:LTBP1:TGFA:LOXL3:FBLN7:C1QL2:COL5A2:VWC2L:IGFBP5:COL6A3:SNED1:FBLN2:CLEC3B:ITIH1:WNT5A:PLOD2:IGSF10:FGF12:MUC4:IGFBP7:ADAMTS3:FGF5:SPARCL1:IL15:SPOCK3:ANXA10:SEMA5A:EGFLAM:CRHBP:VCAN:HAPLN1:EDIL3:FBN2:CXCL14:NRG2:ADAM19:C1QTNF2:SLIT3:COL23A1:SERPINB1:SERPINB6:F13A1:TNXB:COL11A2:COL21A1:EYS:COL9A1:LAMA4:COL10A1:SMO…
22	Curated_gene_sets	MEISSNER_NPC_HCP_WITH_H3K4ME3_AND_H3K27ME3	141	38	2.5673e-06	0.000438806	PTCHD2:AK5:NMNAT2:ATOH8:SH3RF3:KIF5C:IGF2BP2:FGF5:CDS1:ANKRD33B:ELFN1:RELN:GRM8:CSMD1:NEFM:GDF6:RSPO2:CXCL12:KCNMA1:ADRA2A:TSPAN18:B4GALNT3:KCNH3:HOXC4:HOXC4:FGF9:FLT1:GPC5:COCH:MAP3K9:WDR20:GREM1:BMF:ST8SIA2:SYNM:ADORA2B:MYO1D:PDE4A:CDH22
23	Curated_gene_sets	LINDGREN_BLADDER_CANCER_CLUSTER_2B	355	75	2.66606e-06	0.000444002	UBE2J2:CLIC4:LCK:FAM46C:GJA5:PRRX1:RGL1:TTC7A:ZAP70:COL5A2:NRP2:TNS1:COL6A3:LMCD1:FBLN2:FILIP1L:MYLK:AMOTL2:RBP1:PCDH7:RHOH:IGFBP7:LEF1:FYB:EDIL3:NR2F1:SYNPO:ADAM19:EBF1:NEURL1B:GFOD1:UBD:HLA-DMA:RUNX2:FYN:LAMA4:EPB41L2:LAT2:PDGFRL:PNOC:PTK2:SVEP1:PAPPA:GSN:STOM:NEK6:CELF2:CXCL12:MICAL2:APLNR:MGP:NR4A1:LUM:LIG4:STXBP6:NID2:PRKCH:IL16:COTL1:CCL15:TIMP2:COLEC12:TCF4:MALT1:NFATC1:ICAM1:CD97:JAK3:MYA…
24	Curated_gene_sets	KEGG_ECM_RECEPTOR_INTERACTION	81	26	3.07084e-06	0.000498628	THBS3:TNR:COL5A2:COL6A3:ITGA9:CD47:ITGB5:GP9:GP5:TNXB:COL11A2:LAMA4:RELN:LAMB1:LAMB4:ITGA8:ITGB7:COL4A1:COL4A2:SV2B:GP1BA:ITGA2B:ITGB3:ITGB4:GP6:COL6A1
25	Curated_gene_sets	REACTOME_NERVOUS_SYSTEM_DEVELOPMENT	521	100	6.11206e-06	0.000968241	EPHA8:COL9A2:DAB1:SEMA4A:MPZ:NFASC:ENAH:ROCK2:PSME4:SCN1A:SCN9A:COL5A2:NRP2:COL6A3:CHL1:ITGA9:ROBO2:GAP43:KALRN:WWTR1:EPHA5:SCD5:ANK2:SEMA5A:PIK3R1:RASA1:RGMB:SLIT3:PDLIM7:RANBP9:CAP2:MAPK14:COL9A1:FYN:RPS6KA2:SEMA3E:RELN:LAMB1:UNC5D:ANK1:PTK2:ARHGAP39:SEMA4D:DNM1:LHX3:GRIN1:UPF2:NRP1:CUL2:CXCL12:ANK3:EGR2:SLIT1:DOCK1:TEAD1:GAB2:DSCAML1:ARHGEF12:ROBO3:CACNA1C:NELL2:TUBA1B:SRGAP1:FRS2:PLXNC1:TRPC4…
26	Curated_gene_sets	ONDER_CDH1_TARGETS_2_UP	231	53	6.65714e-06	0.00100554	ROR1:PTGFR:PRRX1:RGL1:NID1:LTBP1:COL5A2:SATB2:COL6A3:SNED1:LMCD1:PPARG:CLEC3B:WNT5A:MITF:PLOD2:UGDH:IGFBP7:SEMA5A:CDH18:MAP1B:VCAN:NR2F1:NREP:H2AFY:GALNT10:RPS6KA2:DGKI:DLC1:PDGFRL:PRUNE2:NEBL:NRP1:BICC1:KCNMA1:ADAM12:MICAL2:NAV2:ZBTB16:TAGLN:WNT5B:EPS8:DCN:ENOX1:PCDH9:ITGBL1:NID2:GREM1:SYNM:PRKCA:CDH2:MYL9:COL6A1
27	Curated_gene_sets	PICCALUGA_ANGIOIMMUNOBLASTIC_LYMPHOMA_UP	202	48	6.5447e-06	0.00100554	WLS:CTTNBP2NL:PRRX1:RGL1:CHI3L1:ANTXR1:SEPT10:TANC1:IGFBP5:TNS1:ITGA9:MYLK:WWTR1:FAM114A1:IGFBP7:WDFY3:SPARCL1:PDLIM5:ANK2:GABBR1:C2:LAMA4:SMOC2:LAMB1:CAV2:CLU:RBPMS:SULF1:PTGDS:CXCL12:KCNMA1:ADRA2A:PARVA:ARHGAP42:TAGLN:LUM:DCLK1:COL4A1:COL4A2:IFI27:LOXL1:GPRC5B:CCL14:CCL15-CCL14:ANKRD29:CCDC102B:MYL9:ADAMTS1:COL6A1
28	Curated_gene_sets	CARRILLOREIXACH_HEPATOBLASTOMA_VS_NORMAL_HYPOMETHYLATED_AND_UP	159	40	8.90042e-06	0.00131382	RERE:ZSWIM5:PTPN14:RRM2:GREB1:ANTXR1:UGGT1:R3HDM1:STK39:NRP2:COL6A3:SMARCC1:IGF2BP2:MAP1B:RASGRF2:VCAN:EDIL3:SLIT3:NPM1:F13A1:LAMA4:SMOC2:LAMB1:STC1:KCNU1:SNTG1:SULF1:ITGA8:MGP:PLXNC1:COL4A1:COL4A2:UACA:CDH13:MYO1D:IGF2BP1:PIEZO2:TCF4:ADRBK2:ZNRF3
29	Curated_gene_sets	CHICAS_RB1_TARGETS_CONFLUENT	526	100	9.29475e-06	0.00132615	HIVEP3:ROR1:AK5:GBP2:FAM46C:RABGAP1L:OPN3:LIMS2:GALNT5:SCN9A:FAM171B:COL5A2:KLF7:PPARG:GALNT15:CLEC3B:LIMD1:CNTN3:VGLL3:MYLK:RBP1:KCNMB2:CORIN:TSPAN5:MAP1B:RGMB:NREP:FBN2:H2AFY:SYNPO:GALNT10:SGCD:ADAM19:PDLIM7:KDM1B:LAMA4:EPB41L2:OSBPL3:RSBN1L:RELN:CAV2:PTN:KCNH2:PDGFRL:MTUS1:CLU:SULF1:RUNX1T1:BAALC:MTSS1:CDKN2A:GSN:OPTN:NRP1:CXCL12:KCNMA1:PRKCDBP:RRAS2:NAV2:MRGPRF:ANO1:CADM1:TAGLN:WNT5B:TUBA1B:S…
30	Curated_gene_sets	GOZGIT_ESR1_TARGETS_DN	664	121	9.39228e-06	0.00132615	GRIK3:TTC39A:WLS:IFI44L:GBP2:DPYD:SLC19A2:ENAH:PGBD5:CAPN9:GREB1:TGFA:KLF7:MAP2:ERBB4:IGFBP5:LMCD1:TRANK1:PTPRG:PRICKLE2:MITF:FOXP1:PLCXD2:CPNE4:BCL6:PCDH7:FAM114A1:UGDH:APBB2:SCD5:PDLIM5:PCDH10:UBE2QL1:CTNND2:PRLR:NNT:NREP:CAP2:RNF144B:DCDC2:GABBR1:RUNX2:MYO6:FUT9:SGK1:AHI1:RPS6KA2:SDK1:AHR:BLVRA:CAV2:TMEM140:HIPK2:PDGFRL:PSD3:STC1:CLU:RBPMS:SDR16C5:SULF1:GRHL2:ZHX2:FBXO32:MTSS1:PTK2:FAM189A2:FB…
31	Curated_gene_sets	BOQUEST_STEM_CELL_UP	240	54	1.00049e-05	0.00138259	ROR1:PTGFR:PRRX1:PLA2G4A:LRP1B:COL5A2:COL6A3:HDAC4:CHL1:WNT5A:ACOX2:PTPRG:MITF:TMEM45A:UGDH:ADH1C:ANK2:VCAN:CXCL14:SGCD:SLIT3:GFPT2:BBS9:PDGFRL:PTPRD:SVEP1:GSN:PTGDS:NET1:CELF2:ITGA8:CXCL12:GDF10:BICC1:MGP:LRP1:LUM:DCN:DCLK1:PCDH9:ITGBL1:IRS2:F10:SERPINA5:MEG3:ASPA:GAS7:ABCA6:COLEC12:MBP:AXL:HAS1:SLC2A10:COL6A1
32	Curated_gene_sets	KIM_MYC_AMPLIFICATION_TARGETS_DN	96	28	1.03963e-05	0.00140675	PPCS:CFLAR:KCNMB2:SORBS2:ELOVL7:MYO6:ZNF292:CCDC146:PTPRN2:PLEKHA2:SPAG1:GRHL2:TTC39B:CCDC171:PRUNE2:OPTN:NEBL:SPAG6:NUCB2:GAB2:KIRREL3:SCNN1A:RMST:DCLK1:RORA:ADAMTS18:ATCAY:ZNF468
33	Curated_gene_sets	CHANDRAN_METASTASIS_DN	289	62	1.1494e-05	0.00151049	CACHD1:PDE4B:PRRX1:PTGS2:LIMS2:WDR33:SFT2D3:TNS1:PRICKLE2:CNTN3:ROBO2:LSAMP:MYLK:PCDH7:CWH43:ANTXR2:SCD5:RNF150:SPOCK3:SORBS2:MCC:ALDH7A1:TNIP1:GABBR1:AMD1:NT5DC1:ECHDC1:EYA4:AHI1:SMOC2:LFNG:CAV2:PTN:PTPRN2:PSD3:RORB:ZMYND11:ITIH5:EGR2:COL13A1:SORBS1:FGFR2:LHPP:MRGPRF:WNT5B:PDZRN4:SMAGP:NR4A1:ASB2:SMAD3:THSD4:FBXO22:CLCN7:ERBB2:GHDC:RBFOX3:FOSB:KLK10:KLK11:NECAB3:BMP7:PMEPA1:UPK3A
34	Curated_gene_sets	DURAND_STROMA_S_UP	265	58	1.16281e-05	0.00151049	SELP:ADCY3:TCF7L1:IL18RAP:NCKAP5:GALNT13:TMEFF2:SORCS2:RNF150:IL15:DCLK2:FYB:PDE4D:ADAM19:SERPINB1:SERPINB6:TFAP2A:NOTCH4:HLA-DMA:EYA4:LRP11:SMOC2:PRKAR1B:ELFN1:AHR:TBX20:PTN:CSGALNACT1:PLEKHA2:RSPO2:RORB:PRUNE2:SVEP1:PAPPA:CXCL12:FGFR2:ADAM12:EBF3:RAB3IL1:MRGPRF:UBASH3B:KIRREL3:HOXC8:RALGAPA1:NID2:IFI27:PPP1R13B:LOXL1:GNAO1:CDYL2:MYO1D:HOXB13:PHOSPHO1:ARHGAP28:NFATC1:HCN2:JAK3:SCN1B
35	Curated_gene_sets	GENTILE_UV_LOW_DOSE_DN	59	20	1.67327e-05	0.00213096	PEX14:EHBP1:STK39:SATB2:IGFBP5:SEMA5A:CDH18:RASA1:CXCL12:COL13A1:DOCK1:MICAL2:DDX10:ERC1:NAV3:SAMD4A:SIPA1L1:WWOX:CDH2:COL6A1
36	Curated_gene_sets	CHEMNITZ_RESPONSE_TO_PROSTAGLANDIN_E2_DN	355	72	1.83271e-05	0.00228912	ICMT:CAMTA1:CLIC4:ZMYND12:GPBP1L1:IL12RB2:KCNT2:OPN3:GRHL1:CCDC148:SATB2:CHL1:HRH1:XPC:TBC1D5:OSBPL10:LRRFIP2:WNT5A:MITF:ZBTB20:SCHIP1:PROM1:CDS1:WDFY3:SEMA5A:EDIL3:SIRT5:KCNK5:PTCHD4:PDSS2:REV3L:LINC00271:RPS6KA2:AHR:MACC1:COBL:SUMF2:CLDN12:LMTK2:CUX1:NAPEPLD:RELN:EXOC4:NKAIN3:PTPRD:PAPPA:ASTN2:LINC00963:SPAG6:BICC1:PAX2:PLEKHA7:SCNN1A:PPFIBP1:LRRK2:SMAGP:LMO7:STXBP6:SIPA1L1:NRXN3:IQCH:FBXL16:IF…
37	Curated_gene_sets	WP_PRIMARY_FOCAL_SEGMENTAL_GLOMERULOSCLEROSIS_FSGS	69	22	1.94804e-05	0.00238727	IRF6:CTNNB1:SYNPO:FYN:KRT8P3:PTK2:LMX1B:DNM1:NOTCH1:VCL:PLCE1:PAX2:CD151:PARVA:WT1:KIRREL3:PTPRO:KRT8:AKT1:MYO1E:ITGB3:ITGB4:CDH2
38	Curated_gene_sets	MANNE_COVID19_COMBINED_COHORT_VS_HEALTHY_DONOR_PLATELETS_DN	199	46	2.14819e-05	0.0025838	WLS:DPYD:ENAH:GRHL1:SEPT10:HECW2:IGFBP5:TNS1:FGD5:ERC2:CPNE4:P2RY12:LDB2:BANK1:CTNND2:ANKRD55:SYNPO:CDYL:DCDC2:HLA-DMB:SDK1:TFPI2:GPIHBP1:PTPRD:PAX5:PAPPA:ZNF438:CXCL12:CPXM2:ADAM12:IGF2:NR4A1:LIG4:COL4A1:COL4A2:STXBP6:CEP128:DLK1:KIAA1024:WWOX:IRF8:PPM1E:SIGLEC12:PLCB1:PHACTR3:MAP3K7CL
39	Curated_gene_sets	SCHUETZ_BREAST_CANCER_DUCTAL_INVASIVE_UP	326	67	2.27362e-05	0.00268494	ROR1:DPYD:PRRX1:NID1:AKT3:ZEB2:COL5A2:COL6A3:LMCD1:FBLN2:WWTR1:LDB2:IGFBP7:SPARCL1:MAP1B:VCAN:NREP:FBN2:SGCD:ADAM19:GFPT2:HLA-DQB2:HLA-DMB:HLA-DMA:FYN:LAMA4:COL10A1:SGK1:QKI:SKAP2:DPY19L1:LAMB1:SULF1:HEY1:CELF2:NRP1:BICC1:PLAU:ADAM12:PRKCDBP:MICAL2:PARVA:SPON1:MS4A6A:NOX4:LUM:DCN:PLXNC1:ITGBL1:COL4A1:COL4A2:NID2:SAMD4A:NDN:GREM1:LOXL1:TMEM204:PLCG2:IRF8:COLEC12:LDLRAD4:TCF4:AXL:MYL9:PMEPA1:ERG:CO…
40	Curated_gene_sets	FOROUTAN_TGFB_EMT_UP	188	44	2.32435e-05	0.00269583	AKT3:COL5A2:KLF7:IGFBP5:TNS1:COL6A3:LMCD1:HRH1:WNT5A:VGLL3:SLCO2A1:FAM114A1:APBB2:IGFBP7:VCAN:NREP:GALNT10:ADAM19:SPDL1:PDLIM7:GFPT2:JARID2:RUNX2:TFPI2:DLC1:STC1:KCNMA1:ADAM12:MICAL2:CD59:TAGLN:WNT5B:LUM:COL4A1:COL4A2:DAAM1:GREM1:ITGB3:TIMP2:CDH2:TCF4:TPM4:MYL9:PMEPA1
41	Curated_gene_sets	REACTOME_INTEGRIN_CELL_SURFACE_INTERACTIONS	80	24	2.60691e-05	0.00291929	COL9A2:COL5A2:COL6A3:ITGA9:CD47:ITGB5:COL23A1:COL9A1:COL10A1:ITGA8:COL13A1:ITGB7:LUM:COL4A1:COL4A2:ITGAE:ITGA2B:ITGB3:ICAM1:ICAM4:ICAM5:COL9A3:COL18A1:COL6A1
42	Curated_gene_sets	KEGG_FOCAL_ADHESION	190	44	3.06072e-05	0.00336939	THBS3:TNR:AKT3:ROCK2:COL5A2:COL6A3:ITGA9:CTNNB1:MYLK:ITGB5:PIK3R1:TNXB:COL11A2:FYN:LAMA4:HGF:RELN:LAMB1:LAMB4:CAV2:PTK2:ITGA8:VCL:DOCK1:PARVA:BIRC2:ITGB7:FLT1:COL4A1:COL4A2:AKT1:PAK6:TLN2:MAP2K1:ERBB2:ITGA2B:ITGB3:PRKCA:ITGB4:PIP5K1C:ARHGAP35:PRKCG:MYL9:COL6A1
43	Curated_gene_sets	REACTOME_COLLAGEN_FORMATION	86	25	3.23138e-05	0.00349797	COL9A2:LOXL3:COL5A2:COL6A3:PLOD2:ADAMTS3:COL23A1:COL11A2:COL21A1:DST:COL9A1:COL10A1:CTSB:COL13A1:TLL2:CD151:COL4A1:COL4A2:PPIB:LOXL1:ITGB4:COL9A3:COL20A1:COL18A1:COL6A1
44	Curated_gene_sets	MARTIN_VIRAL_GPCR_SIGNALING_DN	48	17	3.73958e-05	0.00394326	LGR6:TRAK1:CD86:TF:DGKQ:TBC1D1:FAM47E-STBD1:VCAN:MAN2A1:HIST1H1A:NOD1:RNF122:NEBL:WT1:OR5B12:SLCO1A2:SMPD3
45	Curated_gene_sets	REACTOME_DISEASES_ASSOCIATED_WITH_O_GLYCOSYLATION_OF_PROTEINS	62	20	3.80359e-05	0.00394326	MUC4:ADAMTS3:SEMA5A:NOTCH4:LFNG:MUC12:MUC17:RN7SKP54:NOTCH1:MUC6:MUC5B:SPON1:ADAMTS20:B3GALTL:THSD4:ADAMTSL3:ADAMTS18:ADAMTSL5:MUC16:ADAMTS1:LARGE
46	Curated_gene_sets	MEBARKI_HCC_PROGENITOR_WNT_UP_BLOCKED_BY_FZD8CRD	113	30	3.82487e-05	0.00394326	NAV1:DISC1:GNG4:ST6GAL2:COL5A2:KLF7:IGFBP5:PRICKLE2:PPP2R2C:LEF1:VCAN:HAPLN1:ALDH7A1:PDLIM7:LFNG:LZTS1:CLIC3:CCDC3:RARG:MDM1:LUM:DCN:CORO1C:STXBP6:BMF:NDRG4:NXN:TPM4:MYADM:ADRBK2
47	Curated_gene_sets	PEREZ_TP63_TARGETS	319	65	3.94212e-05	0.00394747	LUZP1:CACHD1:FAM46C:CNNM4:LIMS2:PLCD1:PLCXD2:LAMP3:PPP2R2C:FAM47E-STBD1:STOX2:SLC9A3:UBE2QL1:CXCL14:GFPT2:MAPK14:ARID1B:SYNJ2:MICALL2:ELFN1:AUTS2:KCNH2:DLC1:CLU:HEY1:EPPK1:SEMA4D:GABBR2:CLIC3:CELF2:IGF2:PTPRJ:WNT5B:ZNF385A:CTDSP2:SMAD9:ATP11A:GRTP1:PRKCH:SYNE2:PPP1R13B:PAK6:RORA:ST8SIA2:CRAMP1L:CX3CL1:CDYL2:DOC2B:ACAP1:NTN1:KSR1:RAB11FIP4:TNRC6C:NPTX1:NFATC1:APC2:TNPO2:DPF1:DEDD2:PPP1R16B:COL9A3:…
48	Curated_gene_sets	PANGAS_TUMOR_SUPPRESSION_BY_SMAD1_AND_SMAD5_UP	124	32	3.95051e-05	0.00394747	TTC39A:NAV1:NID1:FAM110C:RBMS3:RBP1:SORCS2:APBB2:STOX2:EYA4:PTPN12:CAV2:PRUNE2:SPIN1:GSN:CELF2:TRIM5:PRKCDBP:CACNA1C:ENOX1:MCF2L:SIPA1L1:HDGFRP3:TMEM204:ZNF423:DOC2B:UNC13D:TCF4:NFATC1:NFIX:PTPN1:BMP7
49	Curated_gene_sets	HOELZEL_NF1_TARGETS_DN	103	28	4.31925e-05	0.00420054	AK5:PLEKHA6:GREM2:ST6GAL2:IGFBP5:WNT5A:ROBO2:NR2F1:NREP:PCDHB2:AMPH:CUX1:CCDC3:MYRF:ST8SIA1:HOTAIR:HRK:DNAJC15:NTRK3:ST8SIA2:TMEM204:ZNF423:WWOX:ARHGAP28:LDLRAD4:RNF165:PHACTR3:ADAMTS1
50	Curated_gene_sets	BRUINS_UVC_RESPONSE_LATE	1023	170	4.33313e-05	0.00420054	PEX14:MECR:PGM1:PDE4B:LRRC8D:ACP6:SNX27:SELP:KIFAP3:MARC2:GALNT2:NID1:RGS7:TTC7A:MSH2:TGFA:LOXL3:STAM2:XIRP2:COL5A2:ORMDL1:PPIL3:COL6A3:CMC1:RBMS3:LRRFIP2:ACOX2:PTPRG:GAP43:GYG1:WWTR1:BCL6:STX18:SORCS2:HS3ST1:TBC1D1:FAM114A1:GABRB1:REST:PRKG2:TSPAN5:IL15:CTNND2:ELOVL7:ZBED3:CCNH:FER:CXCL14:SIL1:TNIP1:SGCD:PTTG1:SLIT3:NPM1:RUFY1:SQSTM1:ACOT13:COL11A2:QRSL1:RPF2:LAMA4:ECHDC1:PCMT1:TIAM2:SMOC2:AHR:O…
51	Curated_gene_sets	PASINI_SUZ12_TARGETS_DN	296	61	4.76269e-05	0.00444099	SPSB1:WLS:GBP2:MLLT11:SERTAD4:KIF5C:KLF7:IGFBP5:LRRFIP1:UBE2E1:CMTM7:LIMD1:FOXP1:VGLL3:FILIP1L:PHLDB2:GAP43:AMOTL2:RBP1:PLOD2:WWTR1:PROM1:PDLIM5:VCAN:NREP:PDLIM7:PTPN12:SEMA3E:CLDN12:CAV2:KRT8P3:SULF1:GSN:FAM107B:VCL:ADK:SH3PXD2A:CD151:PARVA:RRAS2:TAGLN:WNK1:TSPAN9:PKP2:KRT8:CORO1C:IRS2:SAMD4A:MEG3:AKT1:ANXA2:CSNK1G1:TIMP2:COLEC12:CDH2:CTXN1:TPM4:AXL:MYADM:ZMYND8:GNAS:APP
52	Curated_gene_sets	CARRILLOREIXACH_MRS3_VS_LOWER_RISK_HEPATOBLASTOMA_DN	153	37	4.78629e-05	0.00444099	CLIC4:PDE4B:CTTNBP2NL:RGL1:PTGS2:NFASC:AKT3:LTBP1:ANTXR1:ZEB2:RBMS3:MITF:FILIP1L:GNB4:PCDH7:RNF150:PCDHGB7:SGCD:PRDM1:EPB41L2:MAMDC2:PLXDC2:ZNF438:CSGALNACT2:PRKG1:ANK3:SWAP70:MGP:LUM:DCN:IQGAP1:LINC00924:TIMP2:RAB31:TCF4:AXL:ADAMTS1
53	Curated_gene_sets	KIM_ALL_DISORDERS_CALB1_CORR_UP	501	93	4.8602e-05	0.00444606	WDR47:MLLT11:RUSC1:CREG1:KIFAP3:NMNAT2:RGS7:PUM2:LRPPRC:NRXN1:RTN4:EHBP1:SLC25A12:CHL1:GPD1L:KALRN:MBNL1:SCHIP1:LDB2:GPM6A:CRHBP:RASA1:PCSK1:NREP:H2AFY:PFDN1:CANX:CAP2:TDP2:HIVEP2:PCMT1:RAPGEF5:GGCT:ELMO1:AMPH:STX1A:NDUFA5:CUL1:DPP6:PTPRN2:TUSC3:STAU2:ANKRD46:RAD21:GRINA:PRUNE2:GABBR2:STXBP1:DNM1:ATP5C1:OPTN:PSAP:NELL1:MADD:FIBP:DDX10:OPCML:LMO3:C2CD5:NELL2:SYT1:RSRC2:TMED2:RAN:DCLK1:ATP6V1D:EIF2…
54	Curated_gene_sets	WP_FOCAL_ADHESION	188	43	5.11293e-05	0.00461229	FGR:THBS3:TNR:AKT3:ROCK2:COL5A2:ITGA9:CTNNB1:MYLK:ITGB5:TNK2:PIK3R1:TNXB:FYN:LAMA4:HGF:RELN:LAMB1:CAV2:BLK:PTK2:ITGA8:VCL:DOCK1:PARVA:BIRC2:ITGB7:FLT1:COL4A1:COL4A2:AKT1:PAK6:TLN2:MAP2K1:ERBB2:ITGA2B:ITGB3:PRKCA:ITGB4:PIP5K1C:ARHGAP35:PRKCG:MYL9
55	Curated_gene_sets	HOQUE_METHYLATED_IN_CANCER	54	18	5.64007e-05	0.00501812	PTGS2:FHIT:RBP1:QDPR:VCAN:CDX1:TFAP2A:GATA4:CDKN2A:PAX5:MGMT:WT1:CADM1:CDH13:BRCA1:GFAP:TIMP2:SEZ6L
56	Curated_gene_sets	KYNG_DNA_DAMAGE_BY_4NQO	32	13	5.91768e-05	0.00519396	FBLN2:WNT5A:ITGB5:SSR3:ADH6:PDGFRL:NET1:PCK2:IL16:ANKRD11:ADAMTS1:IFNGR2:POLR2F
57	Curated_gene_sets	BROWNE_HCMV_INFECTION_18HR_DN	161	38	6.69448e-05	0.00579742	THBS3:RBMS3:PLCD1:TRAK1:ACOX2:MYLK:GP9:SLC9A3:SEMA5A:CRHBP:VCAN:ALDH7A1:TNIP1:SGCD:DST:FYN:RPS6KA2:INSIG1:PNOC:RBPMS:PTPRD:ADAM12:IGF2:SLC22A18:TEAD1:CCDC85B:TENC1:YLPM1:OCA2:GREM1:ANXA2:LOXL1:FAH:CBFA2T3:ZFR2:TPM4:AXL:COL6A1
58	Curated_gene_sets	NABA_ECM_GLYCOPROTEINS	180	41	8.33099e-05	0.00711971	VWA1:RSPO1:THBS3:TNR:NID1:LTBP1:FBLN7:IGFBP5:SNED1:FBLN2:IGSF10:IGFBP7:SPARCL1:EGFLAM:EDIL3:FBN2:SLIT3:TNXB:EYS:LAMA4:SMOC2:VWDE:IGFBP1:RELN:LAMB1:LAMB4:RSPO2:SVEP1:SLIT1:TECTB:VWA2:DMBT1:SPON1:NELL1:MGP:NELL2:COCH:NID2:THSD4:ZP2:NTN1
59	Curated_gene_sets	NIKOLSKY_BREAST_CANCER_6P24_P22_AMPLICON	21	10	8.52365e-05	0.00718975	GFOD1:SIRT5:RANBP9:RNF182:CD83:CAP2:FAM8A1:KIF13A:KDM1B:RNF144B
60	Curated_gene_sets	ZHAN_MULTIPLE_MYELOMA_CD1_VS_CD2_DN	51	17	9.00972e-05	0.00740736	TLK1:OSBPL10:TBC1D1:STAP1:PRDM5:GM2A:RAPGEF5:PNOC:NEK6:SBF2:NAV2:DENND5B:TMTC2:CORO1C:STXBP6:PRKCA:FAM19A5
61	Curated_gene_sets	NABA_COLLAGENS	42	15	9.51139e-05	0.00762672	COL9A2:COL5A2:COL6A3:COL23A1:COL11A2:COL21A1:COL9A1:COL10A1:COL13A1:COL4A1:COL4A2:COL9A3:COL20A1:COL18A1:COL6A1
62	Curated_gene_sets	REACTOME_COLLAGEN_CHAIN_TRIMERIZATION	42	15	9.51139e-05	0.00762672	COL9A2:COL5A2:COL6A3:COL23A1:COL11A2:COL21A1:COL9A1:COL10A1:COL13A1:COL4A1:COL4A2:COL9A3:COL20A1:COL18A1:COL6A1
63	Curated_gene_sets	WANG_SMARCE1_TARGETS_UP	266	55	9.97972e-05	0.00790467	ROR1:DPYD:PTGFRN:PRRX1:CHI3L1:NID1:ANTXR1:PCYOX1:KLF7:IGFBP5:COL6A3:LRRFIP1:LMCD1:MYLK:ITGB5:TMEM108:PCDH7:PCDH10:MAP1B:RASGRF2:VCAN:EDIL3:MAN2A1:MCC:PCDHB2:ATXN1:PLAT:SULF1:FBXO32:GABBR2:GSN:STOM:PLXDC2:TLL2:PARVA:WT1:CADM1:TAGLN:KLRC1:MGP:LIMA1:DIP2B:CTDSP2:LUM:DCN:NID2:SIPA1L1:LPCAT2:ITGB3:TIMP2:SERPINB7:PLCB1:MYL9:ATP9A:TSHZ2
64	Curated_gene_sets	ZHOU_INFLAMMATORY_RESPONSE_FIMA_UP	439	82	0.000106839	0.00816378	MORN1:TP73:YRDC:MTF1:IGSF3:DCAF8:DCAF8:PTGS2:GNG4:CTNNA2:ZEB2:GALNT13:SGPP2:ITGA9:CYP8B1:WNT5A:CADPS:LINC00636:KIAA2018:DGKG:CC2D2A:FAM47E-STBD1:LEF1:FAM160A1:SORBS2:ELOVL7:HAPLN1:KLHL3:NRG2:NIPAL4:CD83:RNF144B:FSCN1:RAPGEF5:PRR15:COBL:MDFIC:ESCO2:NKAIN3:HNF4G:TPD52:ZHX2:DMRTA1:SVEP1:PAPPA:ITGA8:CYP2C9:TLL2:NFKB2:EBF3:AC104389.28:OR51B5:SPON1:NAV2:NOX4:ERC1:SRGAP1:HAL:TCTN1:RASAL1:TBX5:FGF9:MCF2L…
65	Curated_gene_sets	MEBARKI_HCC_PROGENITOR_WNT_UP	176	40	0.000106339	0.00816378	NAV1:DISC1:GNG4:ST6GAL2:COL5A2:KLF7:IGFBP5:PRICKLE2:CLSTN2:PPP2R2C:LEF1:VCAN:HAPLN1:ALDH7A1:ADAM19:PDLIM7:LFNG:CARD11:PDGFRL:LZTS1:CLIC3:CCDC3:NANOS1:ADAM12:PKP3:RARG:MDM1:LUM:DCN:CORO1C:STXBP6:BMF:SH3GL3:NDRG4:NXN:ITGB4:TPM4:MYADM:EYA2:ADRBK2
66	Curated_gene_sets	ONKEN_UVEAL_MELANOMA_UP	721	124	0.000108877	0.00822278	CLIC4:NRD1:WLS:MTX1:DCAF8:DCAF8:RABGAP1L:SOX13:CNIH4:OPN3:GREB1:ADCY3:ALK:PSME4:SEPT10:ZEB2:BAZ2B:RAPGEF4:FZD5:ARMC9:AGAP1:LRRFIP1:HDAC4:SEPT2:WWTR1:FAM193A:QDPR:PCDH7:TBC1D1:IGFBP7:SPARCL1:ANK2:GALNT7:SYNPO:HLA-G:HLA-B:C2:HLA-DMA:MYO6:REV3L:SGK1:AHI1:PCMT1:RPS6KA2:MAD1L1:TFPI2:TRRAP:CUX1:CTSB:LZTS1:CHD7:MRPS28:TPD52:ZBTB10:WWP1:RMDN1:CPNE3:PLEKHF2:STK3:ANKRD46:UBR5:EMC2:RAD21:MTSS1:PTK2:PTP4A3:G…
67	Curated_gene_sets	SENESE_HDAC1_AND_HDAC2_TARGETS_DN	212	46	0.000110783	0.00826187	ZNF362:EDN2:COL5A2:IGFBP5:TNS1:RBMS3:WNT5A:PRICKLE2:TMEM45A:MYLK:IGFBP7:ANXA10:HAPLN1:EDIL3:CXCL14:PPP2R2B:SYNPO:EBF1:TENM2:CAP2:LRP11:LAT2:INSIG1:PDGFRL:MTUS1:CLU:CELF2:CASC10:PLCE1:NANOS1:SYT12:TMEM135:TAGLN:PKP2:LUM:ITGBL1:ZNF219:NRXN3:RIN3:LOXL1:TK2:MGAT5B:TMEM200C:DTNA:TCF4:MYL9
68	Curated_gene_sets	MARTENS_BOUND_BY_PML_RARA_FUSION	420	79	0.000111939	0.00826187	NADK:AJAP1:ECE1:FGR:HIVEP3:SYT2:TMCC2:WDR26:LBR:HDAC4:PRKCD:RAB43:SH3BP2:SLC9A3:ANKRD33B:DCTN4:SQSTM1:SERPINB1:GFOD1:HIVEP2:RPS6KA2:LFNG:CUX1:TBXAS1:RNF122:PLEKHA2:CHD7:AKNA:NEK6:CELF2:PSAP:SH3PXD2A:CHST15:PTPRJ:NRXN2:NPAS4:ZBTB16:UBASH3B:WNT5B:CACNA1C:ARID2:MDM1:TESC:RSRC2:NCOR2:RASA3:LTB4R:ASB2:DAPK2:SMAD3:UACA:ZNF710:CRAMP1L:TK2:ST3GAL2:PLCG2:COTL1:IRF8:ANKRD11:WDR81:GAS7:PIGL:KSR1:RARA:TMEM10…
69	Curated_gene_sets	REACTOME_O_LINKED_GLYCOSYLATION	103	27	0.000115479	0.00834896	GALNT2:GALNT13:GALNT5:GALNT15:MUC4:ADAMTS3:GALNT7:SEMA5A:GALNT10:MUC12:MUC17:RN7SKP54:MUC6:MUC5B:SPON1:ADAMTS20:GALNT9:B3GALTL:THSD4:ADAMTSL3:B3GNT9:ST3GAL2:ADAMTS18:B4GALT6:ADAMTSL5:MUC16:ADAMTS1:LARGE
70	Curated_gene_sets	GRYDER_PAX3FOXO1_ENHANCERS_KO_DOWN	414	78	0.00011667	0.00834896	ARID1A:KCNN3:PIGC:NAV1:RRP15:GALNT2:KCNS3:HS1BP3:ALK:MSH6:TCF7L1:SATB2:NRP2:SUMF1:LRRFIP2:PHLDB2:XRN1:APBB2:LIMCH1:WDFY3:ANK2:PGRMC2:SPOCK3:SLC38A9:MSH3:MCC:H2AFY:JARID2:ASCC3:QKI:SDK1:FSCN1:ELMO1:AUTS2:PTPN12:VIPR2:STC1:EYA1:SMARCA2:PRUNE2:DAPK1:SFMBT2:CELF2:CCDC3:SGMS1:PRKG1:PALD1:PLCE1:SORCS1:FAM160B1:FGFR2:CHST15:SBF2:NAV2:NELL1:EXT2:WNK1:TSPAN9:SPATS2:CTDSP2:NOS1:COL4A1:COL4A2:DAAM1:GPHN:SIP…
71	Curated_gene_sets	CHEN_METABOLIC_SYNDROM_NETWORK	1127	182	0.000116975	0.00834896	AJAP1:ZBTB48:PLEKHM2:LDLRAP1:PGM1:CACHD1:WLS:CTTNBP2NL:SNX27:CREG1:RGL1:PLA2G4A:ENAH:NID1:OPN3:DCDC2C:FKBP1B:NLRC4:LTBP1:ANTXR1:FBLN7:ZRANB3:CCDC148:TANC1:ZNF385B:COL5A2:CDK15:ABI2:NRP2:FZD5:PRKAG3:COL6A3:PPARG:FBLN2:RBMS3:PRKCD:FOXP1:FILIP1L:CD86:CHCHD6:SLCO2A1:MFI2:SH3BP2:BST1:TBC1D1:RHOH:ADAMTS3:CDS1:SEMA5A:ANKRD33B:HEXB:VCAN:RASA1:FSTL4:CXCL14:ECSCR:SYNPO:TNIP1:ADAM19:SPDL1:UBTD2:HK3:SERPINB6…
72	Curated_gene_sets	LEIN_CEREBELLUM_MARKERS	77	22	0.000124837	0.00881319	ICMT:NEK2:SLC9A3:MCC:GABRA6:RNF182:GPR63:GSAP:CHD7:KCNT1:GDF10:AFAP1L2:PKP3:ERC1:SYNE2:IL16:CA7:NTN1:LHX1:PEPD:COL18A1:SLC25A18
73	Curated_gene_sets	YOSHIMURA_MAPK8_TARGETS_UP	1179	189	0.000130347	0.00910325	PRKCZ:PLEKHM2:FGR:EDN2:PTGER3:PTGFR:GFI1:GJA5:KCNN3:BCAN:CREG1:TNR:RGS8:SYT2:SOX13:MSH2:WDPCP:CD8A:EIF2AK3:NEURL3:GALNT5:KCNH7:SCN9A:RAPGEF4:SATB2:CRYGD:MAP2:ERBB4:BOK:RAD18:MAPKAPK3:ACOX2:LSAMP:KALRN:CHCHD6:TF:GP5:SULT1E1:SMR3A:FGF5:PRKG2:CDS1:ADH1C:CASP6:CTNND2:PRLR:PDE4D:MAP1B:CRHBP:CXCL14:HTR4:SYNPO:GABRA6:ATXN1:TNXB:HLA-DMA:SYNGAP1:MAPK14:KCNK5:COL9A1:RTN4IP1:HIVEP2:GRM1:OPRM1:HOXA4:IGFBP1:S…
74	Curated_gene_sets	WP_SILDENAFIL_TREATMENT	22	10	0.000138828	0.00959241	PDE4B:AKT3:PPARGC1A:PDE4D:PARK2:PRKG1:NOS1:AKT1:NOS2:PDE4A
75	Curated_gene_sets	BERTUCCI_MEDULLARY_VS_DUCTAL_BREAST_CANCER_DN	155	36	0.000145189	0.00982298	EDN2:CACHD1:LGR6:PTPN14:NCOA1:RTN4:LIMS2:ERBB4:LMCD1:ZNF385D:MYLK:ITGB5:SEMA5A:CTNND2:SLIT3:RP11-3N2.13:ZNF727:PTPRZ1:DLC1:FBXO32:MTSS1:RABGAP1:SH3PXD2A:ADAM12:PARVA:ANO1:PICALM:CADM1:TAGLN:NAV3:SAV1:DAAM1:TLN2:UACA:PPP1R1B:MYL9:SNX21
76	Curated_gene_sets	MULLIGHAN_MLL_SIGNATURE_2_DN	251	52	0.000144498	0.00982298	LUZP1:CLIC4:EDN2:MPL:DNTTIP2:KIFAP3:CHI3L1:LRRN2:PTPN14:VGLL4:UBE2E1:MUC4:RHOH:STAP1:NPM1:RPS6KA2:FSCN1:ELMO1:HGF:ABCB1:RBPMS:ST18:TPD52:RUNX1T1:UBR5:BAALC:PTP4A3:DAPK1:STOM:RALGDS:NET1:ADK:HSD17B12:MYRF:GNPTAB:POLE:MCF2L:PRKCH:HIF1A:SIPA1L1:MYO5C:NEDD4:LOXL1:FAH:ATP2A3:SEPT9:YES1:B4GALT6:TNPO2:PPP1R16B:CDH4:APP
77	Curated_gene_sets	GAVIN_FOXP3_TARGETS_CLUSTER_P7	83	23	0.000147278	0.00986158	WLS:GBP2:LRRC8D:SELP:RABGAP1L:LYST:QPCT:DST:ABCB1:HIPK2:TTC39B:ITIH5:MAP6:ARHGAP20:FGD6:MYO1E:NTRK3:APOBR:SPECC1:LDLRAD4:PARD6G:APP:MTMR3
78	Curated_gene_sets	SMID_BREAST_CANCER_BASAL_DN	631	110	0.000152859	0.0101308	TTC39A:PTGER3:AK5:ANXA9:SLC19A2:CAPN9:EFCAB2:GREB1:KIF5C:STK39:ERBB4:SNED1:ZNF385D:GPD1L:TRAK1:CLEC3B:CACNA2D3:ACOX2:CLSTN2:QDPR:UGDH:RHOH:APBB2:CDS1:SPARCL1:CLGN:LRBA:GALNT7:PRLR:MRPS30:NR2F1:CXCL14:SIL1:PCDHA9:GALNT10:SLIT3:F13A1:MYO6:DDO:BLVRA:HGF:ABCB1:TFPI2:LEP:CNTNAP2:PTPRN2:MTUS1:PSD3:PLAT:KRT8P3:STAU2:WWP1:PLEKHF2:SYBU:FBP1:SVEP1:ASTN2:NEBL:CXCL12:PBLD:KCNMA1:PAX2:ADRA2A:MUC6:SLC22A18:NUC…
79	Curated_gene_sets	MANNE_COVID19_NONICU_VS_HEALTHY_DONOR_PLATELETS_DN	179	40	0.000156328	0.0102561	WLS:DPYD:ENAH:GRHL1:TNS1:FGD5:ERC2:CPNE4:P2RY12:LDB2:BANK1:ANKRD33B:CTNND2:ANKRD55:SYNPO:CDYL:DCDC2:SDK1:TFPI2:GPIHBP1:PTPRD:PAPPA:FAM107B:ZNF438:CXCL12:ADAM12:IGF2:LIG4:COL4A1:COL4A2:CEP128:DLK1:KIAA1024:WWOX:IRF8:RPH3AL:PPM1E:SIGLEC12:PHACTR3:MAP3K7CL
80	Curated_gene_sets	ZHENG_BOUND_BY_FOXP3	464	85	0.000160064	0.0103962	PDE4B:PTGER3:FAM46C:SELP:RABGAP1L:RGS13:RRM2:ASXL2:THADA:ZAP70:TLK1:SUMF1:VGLL4:ANKRD28:TBC1D5:CADPS:FOXP1:KIAA2018:ZBTB20:MBNL1:BCL6:XXYLT1:CC2D2A:RHOH:CORIN:LEF1:FYB:ANKRD55:CWC27:RAPGEF6:ADAM19:HK3:EXOC2:JARID2:ABT1:TRIM27:PRDM1:FYN:HIVEP2:ZC3H12D:OPRM1:NOX3:AHR:ELMO1:AMPH:MDFIC:INTS9:SDR16C5:CHD7:PDE7A:TTC39B:MAMDC2:CELF2:FAM107B:NRP1:CREM:SGMS1:TRIM5:RRAS2:DTX4:MS4A6A:SIK3:UBASH3B:ST8SIA1:C2…
81	Curated_gene_sets	REACTOME_COLLAGEN_BIOSYNTHESIS_AND_MODIFYING_ENZYMES	63	19	0.000162516	0.0104509	COL9A2:COL5A2:COL6A3:PLOD2:ADAMTS3:COL23A1:COL11A2:COL21A1:COL9A1:COL10A1:COL13A1:TLL2:COL4A1:COL4A2:PPIB:COL9A3:COL20A1:COL18A1:COL6A1
82	Curated_gene_sets	DUTERTRE_ESTRADIOL_RESPONSE_24HR_DN	471	86	0.000164686	0.0104866	ID3:RGL1:IRF6:SERTAD4:LYST:ROCK2:STON1:TCF7L1:STAM2:BAZ2B:FAM171B:MAP2:BOK:LMCD1:PPARG:CD47:PHLDB2:SLCO2A1:XRN1:WWTR1:SCHIP1:LIMCH1:CDS1:ABCG2:PDLIM5:CTNND2:FBN2:SYNPO:GALNT10:ZNF354A:SQSTM1:SERPINB1:TFAP2A:RNF144B:MYO6:EPB41L2:HIVEP2:QKI:LFNG:AHR:MACC1:GSAP:PTPN12:HBP1:LAMB1:PSD3:PLEKHF2:FBXO32:CDKN2A:DMRTA1:GABBR2:SFMBT2:OPTN:KIAA1217:ANK3:TRIM5:TAGLN:TMEM45B:LIMA1:DCLK1:DNAJC15:PCDH9:LMO7:SAMD…
83	Curated_gene_sets	MIKKELSEN_NPC_HCP_WITH_H3K4ME3_AND_H3K27ME3	204	44	0.000177923	0.011214	PTCHD2:PTGER3:AK5:PTGFRN:NMNAT2:SH3RF3:KIF5C:HOXD13:IGF2BP2:GABRA4:FGF5:CDS1:ANKRD33B:EGFLAM:TFAP2A:SMOC2:ELFN1:BAIAP2L1:RELN:PTPRN2:CSMD1:NEFM:RSPO2:CXCL12:KCNMA1:CDHR1:TSPAN18:OAF:KCNH3:HOXC4:HOXC4:HRK:FGF9:FLT1:GPC5:COCH:MAP3K9:BMF:AP3B2:ST8SIA2:SYNM:SPIRE2:ADORA2B:PTH2:CDH22
84	Curated_gene_sets	CREIGHTON_ENDOCRINE_THERAPY_RESISTANCE_3	654	113	0.000179563	0.011214	PGM1:SLC44A5:FAM73A:PTGFRN:UAP1:SCYL3:RGL1:LBR:FAM110C:KCNS3:PLEKHH2:EIF2AK3:MFSD9:STAM2:GALNT5:STK39:ORMDL1:FZD5:SGPP2:WDFY1:AGAP1:PPARG:OSBPL10:TRAK1:LIMD1:SLCO2A1:IGF2BP2:HS3ST1:FAM114A1:LIMCH1:CDS1:PDLIM5:TSPAN5:CLGN:GALNT7:MTMR12:NR2F1:FBN2:H2AFY:SERPINB1:TRIM31:DCBLD1:LRP11:SYNJ2:AHR:PRR15:ELMO1:AUTS2:POR:GSAP:CLDN12:LMTK2:BAIAP2L1:CTTNBP2:PTPRZ1:INSIG1:PTPRN2:MTUS1:HEY1:SPAG1:BAALC:FAM83A:…
85	Curated_gene_sets	LU_AGING_BRAIN_UP	241	50	0.000184961	0.0114412	CLIC4:GREB1:LTBP1:MAL:SEPT10:ZEB2:BAZ2B:RAPGEF4:RAMP1:ZBTB20:AMOTL2:PLOD2:WWTR1:PDLIM5:VCAN:FYN:EPM2A:QKI:CAV2:EYA1:CPNE3:STK3:UBR5:ZHX2:MTSS1:GNE:GSN:STOM:NEBL:HNRNPH3:FGFR2:PARVA:SPON1:BBOX1:GAB2:PICALM:WNK1:PLXNC1:GPC5:HIF1A:KLC1:RP11-73M18.2:IQGAP1:IQCK:GPRC5B:ZNF423:RBL2:GFAP:YES1:BMP7:ABCG1
86	Curated_gene_sets	BERNARD_PPAPDC1B_TARGETS_DN	54	17	0.000199256	0.0115766	GSTM4:NAV1:KIF5C:IGFBP5:HDAC4:MAPKAPK3:PTPRG:SH3BP2:PRLR:KCNK5:MACC1:STC1:FBXO32:GLDC:PLCE1:FGFR2:RARA
87	Curated_gene_sets	PID_TXA2PATHWAY	54	17	0.000199256	0.0115766	PRKCZ:FGR:LCK:PRKCD:MAPK14:FYN:BLK:DNM1:PTGDR:PRKCH:AKT1:PRKCA:YES1:ICAM1:PRKCG:ADRBK2:MAPK11
88	Curated_gene_sets	FOROUTAN_PRODRANK_TGFB_EMT_UP	181	40	0.000200525	0.0115766	AKT3:KLF7:IGFBP5:TNS1:LMCD1:HRH1:WNT5A:SLCO2A1:FAM114A1:APBB2:IGFBP7:VCAN:NREP:GALNT10:ADAM19:SPDL1:PDLIM7:GFPT2:JARID2:RUNX2:TFPI2:DLC1:STC1:KCNMA1:ADAM12:MICAL2:CD59:TAGLN:WNT5B:COL4A1:COL4A2:DAAM1:GREM1:ITGB3:TIMP2:CDH2:TCF4:TPM4:MYL9:PMEPA1
89	Curated_gene_sets	MIYAGAWA_TARGETS_OF_EWSR1_ETS_FUSIONS_DN	211	45	0.00019814	0.0115766	AK5:CREG1:PRRX1:CHI3L1:LTBP1:EHBP1:GALNT5:FAM171B:MAP2:LMCD1:RBMS3:PRICKLE2:VGLL3:FILIP1L:PLOD2:TSPAN5:SEMA5A:VCAN:RGMB:NREP:ADAM19:GFPT2:PRDM1:EYA4:RPS6KA2:STC1:BAALC:ABHD17B:NRP1:PLAU:ADAM12:MICAL2:FIBIN:LUM:KCTD4:GPR180:NID2:SYNM:ALDH1A3:B3GNT9:NUDT7:UNK:NEDD4L:SERPINB7:SNX21
90	Curated_gene_sets	KEGG_ARRHYTHMOGENIC_RIGHT_VENTRICULAR_CARDIOMYOPATHY_ARVC	69	20	0.00020141	0.0115766	CTNNA2:TCF7L1:ITGA9:CTNNB1:CACNA2D3:ITGB5:LEF1:SGCD:ITGA8:CACNA1C:PKP2:ITGB7:SGCG:ITGA2B:ITGB3:ITGB4:CDH2:CACNG8:CACNG6:CACNG2
91	Curated_gene_sets	WP_ARRHYTHMOGENIC_RIGHT_VENTRICULAR_CARDIOMYOPATHY	69	20	0.00020141	0.0115766	CTNNA2:TCF7L1:ITGA9:CTNNB1:CACNA2D3:ITGB5:LEF1:SGCD:ITGA8:CACNA1C:PKP2:ITGB7:SGCG:ITGA2B:ITGB3:ITGB4:CDH2:CACNG8:CACNG6:CACNG2
92	Curated_gene_sets	LEE_NEURAL_CREST_STEM_CELL_UP	134	32	0.000192892	0.0115766	LDLRAP1:ROR1:DPYD:NHLH2:NFASC:NRXN1:ZEB2:NRP2:IGFBP5:PCBP4:MITF:TAGLN3:GAP43:RBP1:IGFBP7:HAPLN1:NR2F1:SGCD:TFAP2A:KCNK5:LAMB1:DLC1:LZTS1:NEFM:ST18:RUNX1T1:GSN:SORBS1:SLIT1:LUM:DCN:TMEM204
93	Curated_gene_sets	VECCHI_GASTRIC_CANCER_ADVANCED_VS_EARLY_UP	163	37	0.000194179	0.0115766	PRRX1:AKT3:ANTXR1:COL5A2:TMEM45A:PLOD2:WWTR1:GNB4:BCL6:UBE2QL1:VCAN:NREP:GFPT2:COL10A1:QKI:AUTS2:CAV2:SULF1:HEY1:FBXO32:SFMBT2:PLXDC2:PLAU:ADAM12:NOX4:NTM:MGP:ITGBL1:COL4A1:NID2:HDGFRP3:ZNF423:NXN:RAB31:AXL:TIAM1:FAM19A5
94	Curated_gene_sets	REACTOME_ASSEMBLY_OF_COLLAGEN_FIBRILS_AND_OTHER_MULTIMERIC_STRUCTURES	59	18	0.000203965	0.0116206	COL9A2:LOXL3:COL5A2:COL6A3:COL11A2:DST:COL9A1:COL10A1:CTSB:TLL2:CD151:COL4A1:COL4A2:LOXL1:ITGB4:COL9A3:COL18A1:COL6A1
95	Curated_gene_sets	FOROUTAN_INTEGRATED_TGFB_EMT_UP	118	29	0.000223645	0.0125308	COL5A2:IGFBP5:TNS1:COL6A3:LMCD1:WNT5A:VGLL3:IGFBP7:VCAN:NREP:GALNT10:ADAM19:PDLIM7:GFPT2:DLC1:STC1:KCNMA1:TAGLN:WNT5B:LUM:COL4A1:COL4A2:GREM1:ITGB3:TIMP2:CDH2:TCF4:MYL9:PMEPA1
96	Curated_gene_sets	BLALOCK_ALZHEIMERS_DISEASE_UP	1508	233	0.000223799	0.0125308	NADK:SPSB1:PRDM2:ECE1:ID3:LDLRAP1:ARID1A:MTF1:RRAGC:GBP2:GSTM4:CSDE1:KCNN3:BCAN:PRRX1:SOX13:NFASC:NUCKS1:ENAH:LYST:NID1:AKT3:HS1BP3:ADCY3:PSME4:TCF7L1:POLR1B:R3HDM1:BAZ2B:DHRS9:CFLAR:NRP2:KLF7:ERBB4:IGFBP5:COL6A3:LRRFIP1:RAMP1:ASB1:HDAC4:SNED1:SEPT2:VGLL4:TBC1D5:RBMS3:LRRFIP2:LIMD1:SMARCC1:USP4:TEX264:MITF:ZBTB20:CD86:MYLK:ITGB5:ZNF148:TF:AMOTL2:PLOD2:WWTR1:DGKG:BCL6:FAM193A:SH3BP2:REST:TSPAN5:LE…
97	Curated_gene_sets	WP_SPINAL_CORD_INJURY	113	28	0.000245777	0.0135753	BCAN:SELP:PTGS2:ROCK2:RTN4:CD47:GAP43:VCAN:SLIT3:ROS1:PTPRZ1:LEP:GRIN1:SLIT1:NOX4:NR4A1:CDK2:NOS1:COL4A1:LTB4R:NTN1:NOS2:GFAP:PRKCA:MBP:ICAM1:NCAN:KLK8
98	Curated_gene_sets	ROVERSI_GLIOMA_COPY_NUMBER_DN	50	16	0.000246634	0.0135753	LRP1B:ZEB2:FHL5:GPR63:CDKN2A:SFMBT2:ITIH5:ATP5C1:KCNMA1:ADAM12:DOCK1:PTPRE:ANKRD10:TUBGCP3:GNAO1:FAM19A5
99	Curated_gene_sets	HOELZEL_NF1_TARGETS_UP	119	29	0.000261002	0.0141268	RGS13:NAV1:NRXN1:SCN9A:OSBPL6:MAP2:GAP43:CLSTN2:PCDH7:FAM114A1:SPARCL1:PDLIM5:ANK2:ATXN1:OSBPL3:GSAP:HGF:RELN:SLC18A1:HEY1:PAPPA:TSPAN18:EPS8:MGAT4C:DCLK1:THSD4:RAB31:B4GALT6:GNAS
100	Curated_gene_sets	MIKKELSEN_IPS_ICP_WITH_H3K4ME3_AND_H327ME3	119	29	0.000261002	0.0141268	TNFRSF8:EDN2:RGS8:LOXL3:NCKAP5:ROBO2:PCDHGA1:LAMA4:PTN:PHYHIP:MAMDC2:ADARB2:ITIH5:CALY:OSBPL5:FIBIN:YPEL4:TMEM45B:OPCML:SCNN1A:PTPRR:KLHL1:TMEM63C:CCDC64B:HOXB13:ADAM33:FOXS1:SLC2A10:MIOX
101	Curated_gene_sets	RUIZ_TNC_TARGETS_UP	142	33	0.000265627	0.0141414	GBP2:WDR26:STON1:BAZ2B:COL5A2:VGLL4:ZBTB20:BCL6:LDB2:IGFBP7:LEF1:SEMA5A:NR2F1:HBP1:TBXAS1:TNKS:CSGALNACT1:CLU:EYA1:HEY1:GSN:CXCL12:PSAP:CHST15:PHF21A:C1RL:CTDSP2:RCBTB1:ARHGAP28:FCGRT:SLC2A10:ATP9A:COL18A1
102	Curated_gene_sets	BLALOCK_ALZHEIMERS_DISEASE_DN	1116	178	0.000264568	0.0141414	MECR:MRPS15:PGM1:PDE4B:AK5:MLLT11:RUSC1:BCAN:UAP1:DCAF6:KIFAP3:CACYBP:ASTN1:NMNAT2:RGS7:ROCK2:PUM2:FKBP1B:QPCT:LRPPRC:MSH2:NRXN1:RTN4:CTNNA2:R3HDM1:LRP1B:KIF5C:SCN1A:TLK1:SLC25A12:RAPGEF4:COL5A2:CHL1:LSM3:OSBPL10:FHIT:TAGLN3:GAP43:NDUFB4:KALRN:SCHIP1:LDB2:PCDH7:POLR2B:SEC31A:ABCE1:GPM6A:SORBS2:ADCY2:CDH18:ZFR:NNT:NDUFS4:PDE4D:HEXB:CCNH:PCSK1:NREP:H2AFY:CXCL14:PFDN1:PCDHA9:RNF14:PPP2R2B:KCNIP1:FAR…
103	Curated_gene_sets	WP_HIPPO_SIGNALING_REGULATION_PATHWAYS	97	25	0.000270544	0.014286	PRKCZ:TCF7L1:PRKAG3:CTNNB1:PRKCD:LEF1:CDH18:CDH12:PRKAR1B:STK3:FGFR2:TEAD1:FLT1:PRKCH:SMAD3:CDH8:CDH13:CDH15:PRKCA:CDH2:PRKCG:PLCB1:CDH22:GNAS:CDH4
104	Curated_gene_sets	WP_SPLICING_FACTOR_NOVA_REGULATED_SYNAPTIC_PROTEINS	41	14	0.000278731	0.0145997	PRKCZ:DAB1:CHL1:EPB41L2:CAV2:GABBR2:GRIN1:ANK3:KCNMA1:CADM1:GPHN:TERF2IP:CDH2:KCNQ2
105	Curated_gene_sets	REACTOME_DISEASES_OF_GLYCOSYLATION	131	31	0.000286239	0.0148349	PGM1:BCAN:MUC4:ADAMTS3:SEMA5A:HEXB:VCAN:NOTCH4:LFNG:MUC12:MUC17:RN7SKP54:GNE:NOTCH1:MUC6:MUC5B:SPON1:EXT2:ADAMTS20:LUM:DCN:B3GALTL:GPC5:THSD4:ADAMTSL3:ADAMTS18:MPDU1:ADAMTSL5:MUC16:NCAN:ADAMTS1:LARGE
106	Curated_gene_sets	DELYS_THYROID_CANCER_UP	419	77	0.00028779	0.0148349	ECE1:MAP3K6:ROR1:GBP2:DPYD:IGSF3:MLLT11:CHI3L1:QPCT:TGFA:COL5A2:NRP2:MAP2:RAMP1:ITGA9:PLCD1:MAPKAPK3:PTPRG:ITGB5:IGF2BP2:PCDH7:VCAN:C2:KCNK5:TREM1:MYO6:PRDM1:FYN:COL10A1:RPS6KA2:GGCT:CTSB:TUSC3:MTUS1:PSD3:PTP4A3:GABBR2:COL13A1:PLAU:ADK:SLIT1:ADAM12:PTPRE:CD151:SLC22A18:APLNR:DTX4:MS4A6A:PC:OPCML:EPS8:NELL2:ITGB7:PLXNC1:CORO1C:DOCK9:ATP11A:SAMD4A:GABRG3:ANXA2:DAPK2:SNX1:ALDH1A3:GPRC5B:ABR:MYO1D:GR…
107	Curated_gene_sets	ZHOU_INFLAMMATORY_RESPONSE_LIVE_UP	393	73	0.00029476	0.0150746	SPSB1:RSPO1:YRDC:MTF1:DCAF8:DCAF8:PTGS2:ZEB2:CFLAR:TNS1:SGPP2:HDAC4:PRKCD:WNT5A:CADPS:KIAA2018:MBNL1:FAM47E-STBD1:GPM6A:ELOVL7:MAP1B:HAPLN1:KLHL3:TNIP1:NIPAL4:CANX:SQSTM1:CD83:ATXN1:RNF144B:NOTCH4:EYA4:FSCN1:COBL:HGF:PSD3:ESCO2:SNTG1:HEY1:TPD52:DMRTA1:CYP2C9:LCOR:NFKB2:CALY:SPON1:OAF:LMO3:SRGAP1:NCOR2:PCDH9:COL4A1:TTC9:IQCH:AGBL1:IRF8:CDH15:KDM6B:CCL15:WNK4:NEDD4L:EVI5L:ICAM1:ICAM4:SYDE1:TPM4:NCA…
108	Curated_gene_sets	ROY_WOUND_BLOOD_VESSEL_UP	46	15	0.000303465	0.0153481	GALNT2:FKBP1B:COL5A2:SLCO2A1:VCAN:STC1:SULF1:STOM:NRP1:PLAU:KCNJ8:LUM:COL4A1:NID2:RAB31
109	Curated_gene_sets	RIGGI_EWING_SARCOMA_PROGENITOR_UP	400	74	0.000304836	0.0153481	HIVEP3:DAB1:CACHD1:PTGER3:OLFM3:IGSF3:PTGS2:OPN3:ALK:TGFA:TCF7L1:CSRNP3:TMEFF2:IGFBP5:RAMP1:SMARCC1:SYNPR:KALRN:CLSTN2:SH3TC1:LDB2:PCDH7:CORIN:ADAMTS3:CDS1:LEF1:MARCH1:PIK3R1:NR2F1:ALDH7A1:JARID2:COL21A1:NT5DC1:RELN:CTTNBP2:MYOM2:TRIM35:PNOC:SLCO5A1:FREM1:CCDC171:MAMDC2:DAPK1:PTGDS:CLIC3:FAM107B:PLXDC2:KIAA1217:CREM:WT1:DLG2:ZBTB16:OPCML:LMO3:NELL2:TRHDE:NOS1:TMEM132B:WDFY2:PCDH9:BCL11B:SORD:SH3G…
110	Curated_gene_sets	BOYLAN_MULTIPLE_MYELOMA_C_DN	51	16	0.000318193	0.0158974	ENAH:TANC1:KLF7:PLOD2:SMR3A:SERPINB1:ATXN1:KIF13A:ABCB1:ZBTB10:FZD6:SFMBT2:TRIM5:IRS2:BCL11B:B4GALT6
111	Curated_gene_sets	REACTOME_CA2_PATHWAY	61	18	0.000323542	0.0160412	GNG4:TCF7L1:FZD5:CTNNB1:WNT5A:GNB4:PDE6B:PRKG2:LEF1:FZD6:PRKG1:TNRC6A:GNAO1:PRKCA:TNRC6C:NFATC1:GNG7:PLCB1
112	Curated_gene_sets	LI_CISPLATIN_RESISTANCE_UP	24	10	0.000332484	0.0163597	ZBTB20:HAPLN1:VWDE:TFPI2:SMARCA2:CCDC171:NEBL:ANO3:UACA:CDH2
113	Curated_gene_sets	SENESE_HDAC2_TARGETS_DN	115	28	0.000335623	0.01639	ZNF362:EDN2:GSTM4:GALNT2:COL5A2:WNT5A:ZBTB20:IGFBP7:STOX2:CXCL14:PPP2R2B:CAP2:LRP11:INSIG1:CLU:PLCE1:NANOS1:LSP1:TAGLN:PKP2:LUM:NRXN3:LOXL1:TMEM200C:DTNA:CTXN1:FOXS1:MYL9
114	Curated_gene_sets	YAUCH_HEDGEHOG_SIGNALING_PARACRINE_DN	229	47	0.000366565	0.0176358	PRDM16:ZSWIM5:TNR:SYT2:SMYD3:OSBPL6:ARPP21:SPATA16:GABRB1:PCDH10:HAPLN1:NRSN1:DDO:NMBR:NXPH1:SEMA3E:ASB15:KCNH2:MYOM2:SNTG1:EYA1:KCNK9:PAPPA:CACNA1B:GPR123:TRIM5:NAV2:PTPRJ:MYF5:MYBPC1:FOXN4:CUX2:PCDH9:ZIC5:NPAS3:HIF1A:CEP128:DLK1:IL16:IKZF3:PRKCA:NCAN:INSM1:NCAM2:GRIK1:CABP7:TEX33
115	Curated_gene_sets	VERHAAK_AML_WITH_NPM1_MUTATED_DN	229	47	0.000366565	0.0176358	MPL:PDE4B:IFI44L:CHI3L1:ADCY3:ZAP70:RAMP1:LTF:PROM1:IGFBP7:STAP1:BANK1:RPS6KA2:HGF:ABCB1:CLDN15:MDFIC:CSGALNACT1:RBPMS:ST18:RUNX1T1:BAALC:FZD6:ZHX2:GSN:OPTN:SPON1:MS4A3:NRXN2:CHKA:ARHGEF12:EPS8:SMAGP:POLE:DLK1:MEG3:NEDD4:TMEM204:LDLRAD4:B4GALT6:PALM:GNG7:ICAM4:PPP1R16B:ATP9A:APP:ERG
116	Curated_gene_sets	BROWNE_HCMV_INFECTION_12HR_DN	88	23	0.000376096	0.0178303	RABGAP1L:AKT3:TRAK1:LDB2:FGF5:TSPAN5:NREP:SERPINB1:ATXN1:FYN:DLC1:RUNX1T1:UBR5:GABBR2:CXCL12:HNRNPH3:PLCE1:IGF2:PTPRR:TBX5:SIPA1L1:ZNF516:ZMYND8
117	Curated_gene_sets	MCLACHLAN_DENTAL_CARIES_DN	72	20	0.000375745	0.0178303	LTBP1:NRXN1:KIF5C:GAP43:SPOCK3:GPM6A:SORBS2:CDH12:MAGI2:DPP6:NEBL:ANK3:PDZD8:SPON1:ST8SIA1:SYT1:PCDH9:ZNF423:ATP9A:TIAM1
118	Curated_gene_sets	SMID_BREAST_CANCER_NORMAL_LIKE_UP	423	77	0.000387453	0.0182356	TNFRSF1B:ID3:LCK:CHI3L1:CR2:NRXN1:CD8A:ZAP70:CHL1:CLEC3B:ZBTB20:MYLK:TF:LAMP3:STAP1:SPARCL1:BANK1:LEF1:ANK2:FYB:PIK3R1:SLIT3:F13A1:DST:FYN:LAMA4:HIVEP2:SKAP2:HOXA7:AOAH:ELMO1:HGF:ABCB1:RELN:PTN:CSGALNACT1:LZTS1:CLU:PNOC:RUNX1T1:BAALC:PAX5:SVEP1:PTGDS:ITIH5:CELF2:CXCL12:SORBS1:BBOX1:APLNR:MS4A6A:NRXN2:CTSW:ROBO3:ITGB7:DCN:TESC:F10:BCL11B:DLK1:SNX1:SYNM:ST3GAL2:COTL1:IRF8:DOC2B:ATP2A3:ACAP1:CCL14:C…
119	Curated_gene_sets	REACTOME_DEVELOPMENTAL_BIOLOGY	1039	166	0.000390516	0.0182475	EPHA8:COL9A2:DAB1:GFI1:RPTN:LOR:SEMA4A:MPZ:NFASC:ENAH:WNT3A:AKT3:ROCK2:NCOA1:PSME4:CTNNA2:PKP4:SCN1A:SCN9A:COL5A2:NRP2:COL6A3:CHL1:PPARG:ITGA9:CTNNB1:FOXP1:ROBO2:GAP43:KALRN:WWTR1:PPARGC1A:POLR2B:EPHA5:SCD5:LEF1:ANK2:SEMA5A:PIK3R1:RASA1:RGMB:EBF1:SLIT3:PDLIM7:MAML1:RANBP9:CAP2:HIST1H3A:HIST1H3B:HIST1H3C:HIST1H3D:HIST1H3E:HIST1H3F:HIST1H3G:HIST1H3H:HIST1H3I:HIST1H3J:MAPK14:COL9A1:FYN:RPS6KA2:FAM12…
120	Curated_gene_sets	SCHLESINGER_METHYLATED_DE_NOVO_IN_CANCER	83	22	0.000404193	0.0187517	TP73:PAX7:GATA4:DLC1:PAX5:CXCL12:PRKG1:SLIT1:WT1:KLHL35:CYP27B1:HRK:PPP1R13B:CDH13:ASIC2:RARA:HOXB13:NPTX1:DSC3:GNAS:CDH4:TBX1
121	Curated_gene_sets	MARTINEZ_TP53_TARGETS_UP	565	98	0.000408787	0.0188303	NADK:PTGFR:GBP2:RPTN:MTX1:PTGS2:TNNI1:TMCC2:PTPN14:LTBP1:QPCT:PSME4:RTN4:MAP2:CHRND:FBLN2:ITGA9:PTPRG:TMEM45A:TF:ESYT3:KLB:EPHA5:PDLIM5:ADH1C:CASP6:ZFR:NDUFS4:MAP1B:ZBED3:CXCL14:RNF14:DCTN4:PTTG1:TMED9:LTC4S:SERPINB1:RANBP9:HLA-B:AMD1:SMOC2:PRKAR1B:BRAT1:FSCN1:AHR:TFPI2:PILRA:CLDN15:CUX1:HBP1:CAV2:PTPRZ1:AGK:ABCB8:RAD21:SPIN1:STOM:RABGAP1:RXRA:PFKFB3:ITIH5:CELF2:FAM107B:CXCL12:PSAP:SORBS1:FGFR2:I…
122	Curated_gene_sets	ZHU_CMV_ALL_DN	111	27	0.000431764	0.0197486	COL5A2:IGFBP5:XPC:USP4:MITF:MYLK:SULT1E1:CRHBP:VCAN:SERPINB6:TFAP2A:MAPK14:LAMA4:HIVEP2:AHR:RALGDS:CXCL12:ADRA2A:CD151:IGF2:TAGLN:SGCG:ERCC5:ANP32A:AARS:TPM4:TNNI3
123	Curated_gene_sets	WP_PROSTAGLANDIN_AND_LEUKOTRIENE_METABOLISM_IN_SENESCENCE	29	11	0.000445633	0.0202405	PTGER3:PTGS2:PLA2G4A:ADCY3:IGFBP5:LTC4S:TBXAS1:PTGDS:PLCB1:GNAS:MAPK11
124	Curated_gene_sets	HOLLERN_EMT_BREAST_TUMOR_UP	123	29	0.000471781	0.0212793	PRRX1:LOXL3:CHRNA1:NRP2:GNB4:APBB2:NR2F1:LTC4S:F13A1:EPB41L2:LAMB1:PLAT:DNM1:OLFM1:CSGALNACT2:TSPAN4:LSP1:WNK1:LRP1:DCN:LOXL1:B3GNT9:ST3GAL2:CDH13:CCL15:TIMP2:NFATC1:AXL:FCGRT
125	Curated_gene_sets	WONG_ENDMETRIUM_CANCER_DN	68	19	0.000480875	0.0215399	NID1:PLEKHH2:RAMP1:VGLL3:LDB2:HGF:DPP6:RUNX1T1:FBXO32:RORB:PAPPA:OLFM1:WT1:CTSW:DCN:TMEM132C:ATP8A2:F10:NDN
126	Curated_gene_sets	SILIGAN_BOUND_BY_EWS_FLT1_FUSION	43	14	0.000486979	0.0216639	XPR1:TRIM58:LRP1B:CHL1:LTF:FHIT:GALNT10:HEY1:PTPRD:PAPPA:ERC1:TNRC6A:CDH13:RIT2
127	Curated_gene_sets	CHEBOTAEV_GR_TARGETS_DN	112	27	0.000502387	0.0217533	VWA1:GUCA2A:DAB1:PLA2G4A:PTPN14:IGFBP5:PLCXD2:PHLDB2:LIMCH1:FAM47E-STBD1:PCDHB5:C2:DPY19L1:PLAT:CXCL12:SORCS3:SVIP:PDZRN4:KCTD4:RASA3:NRXN3:LOXL1:COTL1:KLHL10:NPTX1:MYL9:FAM19A5
128	Curated_gene_sets	ZHENG_FOXP3_TARGETS_UP	25	10	0.000492537	0.0217533	FAM46C:IRF6:RHOH:PRDM1:ABCB1:FAM107B:NRP1:CREM:UBASH3B:PRKCH
129	Curated_gene_sets	WEST_ADRENOCORTICAL_TUMOR_DN	480	85	0.000496868	0.0217533	PLA2G4A:COLEC11:NRXN1:TCF7L1:KIF5C:RAPGEF4:IGFBP5:TNS1:ARMC9:RAMP1:HDAC4:RBMS3:CLEC3B:MYLK:SLCO2A1:FGF12:SORBS2:CRHBP:VCAN:NR2F1:GABBR1:RNF39:TCF21:MICALL2:HGF:ABCB1:INTS9:RBPMS:RNF122:PLAT:BAALC:RIMS2:ZMYND11:DIP2C:ITGA8:CREM:CXCL12:SORBS1:WBP1L:CALHM2:LHPP:DOCK1:MGMT:LSP1:USP47:MICAL2:PARVA:SPON1:CCDC85B:MYO7A:CUL5:TAGLN:ROBO3:MGP:NR4A1:LRP1:LUM:DCN:SGCG:RORA:KIAA1024:FAH:ADAMTSL3:SV2B:TMEM204:…
130	Curated_gene_sets	ONDER_CDH1_SIGNALING_VIA_CTNNB1	79	21	0.00051988	0.0223617	CREG1:PRRX1:LTBP1:COL6A3:LMCD1:IGFBP7:MAP1B:VCAN:NREP:GALNT10:CD83:SYBU:ERMP1:PRUNE2:KCNMA1:MICAL2:TAGLN:SCNN1A:GREM1:ICAM1:MYL9
131	Curated_gene_sets	PEREZ_TP53_AND_TP63_TARGETS	184	39	0.000578367	0.0247138	FAM46C:CNNM4:PLCD1:PLCXD2:PPP2R2C:STOX2:SLC9A3:UBE2QL1:CXCL14:ARID1B:MICALL2:AUTS2:EPPK1:SEMA4D:CELF2:IGF2:PTPRJ:ZNF385A:SMAD9:GRTP1:PPP1R13B:PAK6:RORA:ST8SIA2:CRAMP1L:CX3CL1:DOC2B:NTN1:KSR1:RAB11FIP4:TNRC6C:NPTX1:APC2:DEDD2:PPP1R16B:COL9A3:COL18A1:CABP7:WNT7B
132	Curated_gene_sets	ZWANG_TRANSIENTLY_UP_BY_2ND_EGF_PULSE_ONLY	1395	214	0.000597615	0.0249185	MMEL1:SLC2A5:TNFRSF1B:ESPNP:LCK:MANEAL:COL9A2:GUCA2A:GLIS1:FAM151A:IL12RB2:RPTN:MPZ:ANKRD45:TDRD5:NMNAT2:PM20D1:SERTAD4:CAPN9:TRIM67:WDR64:OR2L13:GRHL1:WDR43:STON1:NRXN1:VAX2:ANKRD53:CCDC142:LOXL3:CD8A:LYG2:POLR1B:DPP10:CCDC148:CSRNP3:HOXD13:COL5A2:COL6A3:LRRFIP1:PPARG:FBLN2:CLEC3B:CCR3:ITIH1:SYNPR:PLCXD2:KALRN:RAB43:SLCO2A1:RBP1:WWTR1:IGSF10:KCNMB2:PEX5L:MUC4:MFI2:ADRA2C:JAKMIP1:UGDH:APBB2:NPFFR…
133	Curated_gene_sets	CHARAFE_BREAST_CANCER_LUMINAL_VS_BASAL_DN	429	77	0.000596003	0.0249185	CAMTA1:LUZP1:CLIC4:WLS:DPYD:RGL1:PTGS2:PLA2G4A:GALNT2:AKT3:EHBP1:ANTXR1:TGFA:SEPT10:ORMDL1:CFLAR:HRH1:RBMS3:PHLDB2:IL20RB:WWTR1:MBNL1:SCHIP1:IGF2BP2:TBC1D1:IGFBP7:IL15:ANKRD33B:CARD6:GM2A:GFOD1:DST:AMD1:DCBLD1:SGK1:PPP1R14C:FSCN1:OSBPL3:SKAP2:MDFIC:CAV2:PLAT:FZD6:FAM83A:NRP1:BICC1:PLAU:PRKCDBP:RRAS2:NAV2:CD59:ZBTB16:UBASH3B:PKP2:CORO1C:IRS2:COL4A1:COL4A2:HIF1A:IFI27:MYO1E:ANXA2:SMAD3:ALDH1A3:COTL…
134	Curated_gene_sets	ZHOU_INFLAMMATORY_RESPONSE_LPS_UP	343	64	0.000595316	0.0249185	MORN1:TP73:SPSB1:RPTN:DCAF8:DCAF8:PTGS2:IRF6:CTNNA2:SGPP2:ITGA9:WNT5A:CADPS:KIAA2018:NPHP3-AS1:SULT1E1:FAM47E-STBD1:PDLIM5:LEF1:ELOVL7:NIPAL4:RNF144B:FILIP1:FSCN1:RAPGEF5:TBX20:COBL:ESCO2:SNTG1:NKAIN3:TPD52:ZBTB10:DMRTA1:NFKB2:SPON1:SCGB1D1:NOX4:SIK3:ADAMTS20:SPATS2:SRGAP1:PPFIA2:HAL:BRCA2:MCF2L:NPAS3:TTC9:AGBL1:IRF8:CDH15:CCL15:WNK4:NBR2:NEDD4L:ICAM1:SYDE1:KLK10:ZNF471:PTPN1:UPB1:HPS4:LIMK2:TEX3…
135	Curated_gene_sets	VECCHI_GASTRIC_CANCER_EARLY_DN	317	60	0.000598505	0.0249185	PRDM16:RIMS3:DAB1:PTGER3:FAM46C:SEMA4A:RGS13:GREM2:MAL:KIF5C:ZNF385B:TMEFF2:RBMS3:ACOX2:VEPH1:KCNMB2:PCDH7:CWH43:STAP1:SULT1E1:STOX2:SORBS2:UBE2QL1:RGMB:EBF1:F13A1:FUT9:NT5DC1:VSTM2A:MAGI2:MDFIC:PTPRZ1:CLU:PNOC:UNC5D:MAMDC2:SVEP1:ITIH5:CXCL12:PBLD:CYP2C9:GIF:ZBTB16:PCDH9:SLC15A1:GABRB3:RORA:THSD4:HDGFRP3:NTRK3:SYNM:GNAO1:ASPA:DTNA:SYT4:GNG7:ATP4A:SULT2A1:ZNF471:TMPRSS6
136	Curated_gene_sets	PID_RETINOIC_ACID_PATHWAY	30	11	0.000624933	0.0255279	NCOA1:RBP1:CCNH:MAPK14:RXRA:RARG:NCOR2:AKT1:RARA:PRKCA:PRKCG
137	Curated_gene_sets	WP_DISRUPTION_OF_POSTSYNAPTIC_SIGNALING_BY_CNV	30	11	0.000624933	0.0255279	NRXN1:SYNGAP1:GRM1:STX1A:GRIN1:NRXN2:DLG2:NRXN3:NLGN2:DLGAP1:SHANK1
138	Curated_gene_sets	DACOSTA_UV_RESPONSE_VIA_ERCC3_TTD_DN	80	21	0.000623291	0.0255279	PEX14:ROR1:INTS3:ZEB2:MITF:FAM193A:MSH3:ATXN1:DST:SYNJ2:MAD1L1:SKAP2:AMPH:RBPMS:SGMS1:BTAF1:PLCE1:TEAD1:NAV3:DOCK9:MALT1
139	Curated_gene_sets	PID_TRKR_PATHWAY	59	17	0.000637125	0.0258633	PRKCZ:PIK3R1:RASA1:SQSTM1:ELMO1:DNM1:DOCK1:RHOG:GAB2:NTF3:FRS2:MCF2L:MAP2K1:NTRK3:RIT2:NEDD4L:TIAM1
140	Curated_gene_sets	BEGUM_TARGETS_OF_PAX3_FOXO1_FUSION_UP	54	16	0.000649716	0.025889	DPYD:LTBP1:PTPRG:CLSTN2:PCDH7:GPM6A:NR2F1:SLIT3:CDYL:FARS2:SGK1:AUTS2:MDFIC:PLXNC1:GNAS:ADAMTS1
141	Curated_gene_sets	GUTIERREZ_CHRONIC_LYMPHOCYTIC_LEUKEMIA_DN	54	16	0.000649716	0.025889	ID3:LCK:COL9A2:ROR1:GBP2:IGSF3:FILIP1L:LEF1:ATXN1:HIVEP2:RXRA:PTPRO:ABR:ABCA6:COL9A3:CELSR1
142	Curated_gene_sets	KEGG_PATHWAYS_IN_CANCER	312	59	0.000676974	0.0268106	PTGS2:WNT3A:AKT3:MSH2:MSH6:TGFA:CTNNA2:TCF7L1:FZD5:PPARG:CTNNB1:WNT5A:MITF:FGF12:FGF5:LEF1:PIK3R1:MSH3:LAMA4:HGF:LAMB1:LAMB4:RUNX1T1:FZD6:PTK2:CDKN2A:DAPK1:RALGDS:RXRA:CUL2:WNT8B:NFKB2:SUFU:FGFR2:BIRC2:ZBTB16:CBL:WNT5B:CDK2:FGF9:BRCA2:FGF14:COL4A1:COL4A2:HIF1A:AKT1:DAPK2:MAP2K1:SMAD3:PLCG2:NOS2:ERBB2:RARA:ITGA2B:PRKCA:APC2:PRKCG:STK4:WNT7B
143	Curated_gene_sets	IVANOVA_HEMATOPOIESIS_STEM_CELL_LONG_TERM	198	41	0.000697023	0.0274373	PRDM16:TNFRSF8:DCAF6:PRRX1:SMYD3:TCF7L1:TNS1:ZBTB20:RBP1:LDB2:EPHA5:SYNPO:GM2A:ZNF354A:ATXN1:KIF6:FILIP1:PRDM1:EPB41L2:ZAN:PTPRZ1:DNM1:ZMYND11:PLXDC2:BICC1:ZRANB1:PRKCDBP:EXT2:CACNA1C:SRGAP1:ZNF268:CTD-2140B24.4:PCDH9:DOCK9:MYO5C:RORA:GPRC5B:LPHN1:ZNF784:EYA2:COL18A1:LARGE
144	Curated_gene_sets	MCBRYAN_PUBERTAL_BREAST_6_7WK_UP	180	38	0.00073134	0.0286148	SLC2A5:LCK:PRRX1:CHI3L1:GALNT2:ZEB2:IGFBP5:TNS1:CLEC3B:ZBTB20:DHX36:PIK3R1:GM2A:MAPK14:PI16:LAMA4:EPB41L2:QKI:FSCN1:CUX1:HIPK2:PCMTD1:DAPK1:STOM:SORBS1:EBF3:TMEM45B:WNK1:RAB5B:AKT1:SECISBP2L:KIF1C:RAB5C:TIMP2:SLC25A10:SLC25A10:DNM2:NFIX:COMT
145	Curated_gene_sets	PID_VEGFR1_2_PATHWAY	65	18	0.000753127	0.0292908	CTNNB1:PRKCD:PIK3R1:MAPK14:FYN:PTK2:VCL:PTPRJ:CBL:FLT1:AKT1:NEDD4:MAP2K1:IQGAP1:ITGB3:PRKCA:DNM2:MAPK11
146	Curated_gene_sets	REACTOME_CHONDROITIN_SULFATE_BIOSYNTHESIS	18	8	0.000793469	0.0305574	BCAN:CHPF:VCAN:CSGALNACT1:CSGALNACT2:CHST15:DCN:NCAN
147	Curated_gene_sets	MASSARWEH_TAMOXIFEN_RESISTANCE_UP	528	91	0.000795105	0.0305574	WLS:FAM73A:IGSF3:PTGFRN:SCYL3:PTPN14:WDR26:ENAH:ROCK2:NCOA1:GPR39:FAM171B:COL5A2:ERBB4:IGFBP5:LMCD1:RAD18:TRAK1:PRICKLE2:MYLK:SCHIP1:BCL6:FAM114A1:LIMCH1:CDS1:MTMR12:PDE4D:GALNT10:EBF1:RNF144B:FUT9:EPB41L2:QKI:IQCE:MACC1:CAV2:MTUS1:SPAG1:MTSS1:PPAPDC2:CDC14B:STOM:NET1:SFMBT2:NEBL:KIAA1217:RASGEF1A:TIMM23B:TIMM23:ANK3:KCNMA1:FAM160B1:TACC2:INPP5A:SWAP70:PLEKHA7:NUCB2:PTPRJ:CTNND1:SYT7:SHANK2:TMEM1…
148	Curated_gene_sets	NOURUZI_NEPC_ASCL1_TARGETS	133	30	0.000833581	0.0316614	GFI1:TRIM67:SLC35F3:TPO:MFSD9:ST6GAL2:TNS1:JAKMIP1:PROM1:NKAIN2:EYA1:RIMS2:FAM83A:KCNK9:SLC45A4:PAX5:RASGEF1A:EGR2:MUC5B:MICAL2:DSCAML1:LMO3:SSTR5:SMPD3:ATP2A3:GPR142:NPTX1:CBLN2:HRC:PCBP3
149	Curated_gene_sets	KEGG_CALCIUM_SIGNALING_PATHWAY	163	35	0.000843663	0.0318581	PTGER3:PTGFR:ADCY3:ERBB4:HRH1:PLCD1:MYLK:BST1:SLC25A31:ADCY2:HTR4:GRM1:HTR5A:GRIN1:CACNA1B:TACR2:PLCE1:CACNA1C:NOS1:CYSLTR2:LTB4R2:LTB4R2:ADCY4:RYR3:PLCG2:ATP2A3:ADORA2B:NOS2:ERBB2:PRKCA:SLC8A2:PRKCG:PLCB1:GNAS:NTSR1:CACNA1I
150	Curated_gene_sets	KINSEY_TARGETS_OF_EWSR1_FLII_FUSION_DN	302	57	0.000866198	0.03252	ECE1:NUDT17:THBS3:ATOH8:COL5A2:KLF7:MAP2:IGFBP5:CHPF:LRRFIP1:VGLL4:RBMS3:TRAK1:AMOTL2:IGF2BP2:LIMCH1:IGFBP7:SPARCL1:RNF150:CARD6:MSH3:LNPEP:MAN2A1:EBF1:TENM2:DST:LAMA4:HBP1:DLC1:EYA1:RORB:GSN:LINC00963:KIAA1217:PSAP:PLAU:VCL:PARVA:CD59:GAB2:TAGLN:CEP164:MGP:LMO3:LIMA1:SRGAP1:NCOR2:DCLK1:LMO7:SECISBP2L:ZNF423:SLC38A7:HOXB13:TIMP2:COLEC12:BLCAP:GNAS
151	Curated_gene_sets	REACTOME_CELL_CELL_COMMUNICATION	122	28	0.00091909	0.0343074	LIMS2:CTNNB1:CD47:CDH18:CDH12:FYB:PIK3R1:DST:FYN:SDK1:SKAP2:MAGI2:CLDN12:CLDN15:PTK2:CD151:PARVA:CTNND1:CADM1:KIRREL3:IQGAP1:CDH8:CDH13:CDH15:ITGB4:CDH2:PARD6G:CDH4
152	Curated_gene_sets	BIOCARTA_EGFR_SMRTE_PATHWAY	11	6	0.000987328	0.036644	MAPK14:RXRA:ZBTB16:NCOR2:MAP2K1:RARA
153	Curated_gene_sets	JAEGER_METASTASIS_DN	233	46	0.00100394	0.0368395	CTNNBIP1:LOR:IRF6:QPCT:MAL:LTF:WNT5A:TMEM45A:CWH43:CDS1:ADCY2:CXCL14:DST:MYO6:COBL:PTPRZ1:DPP6:DEFB1:GRHL2:EPPK1:CLIC3:NET1:NEBL:ANK3:CDHR1:FGFR2:PKP3:BBOX1:CTNND1:SCNN1A:PLXNC1:HAL:LTB4R:BCL11B:PAK6:RORA:ASPA:SOX15:RAPGEFL1:ITGB4:DSC3:FXYD3:KLK8:KLK10:KLK11:BMP7
154	Curated_gene_sets	KUMAR_TARGETS_OF_MLL_AF9_FUSION	363	66	0.0010019	0.0368395	LCK:ZNF362:RNF220:PGM1:RUSC1:PLA2G4A:NAV1:CD8A:ZAP70:POLR1B:PKP4:STK39:RAMP1:LTF:MBNL1:GNB4:STX18:HS3ST1:UGDH:LEF1:PRDM5:PGRMC2:ALDH7A1:IRGM:EBF1:CD83:GABBR1:FYN:HIVEP2:HOXA7:TBXAS1:BLK:CTSB:RBPMS:IMPAD1:PDE7A:PTP4A3:CYHR1:TTC39B:PAX5:FBP1:OLFM1:LHX3:SFMBT2:LHPP:TRIM5:EXT2:CTSW:TPI1:KLRC1:MGP:SMAGP:PAN2:ANKRD10:F10:CIDEB:AKT1:METTL9:VPS53:MYO1D:PRKCA:RAB31:NFIX:AKAP8:EYA2:ATXN10
155	Curated_gene_sets	PID_AMB2_NEUTROPHILS_PATHWAY	41	13	0.00101719	0.0369085	PRKCZ:FGR:LCK:SELP:FYN:BLK:PLAT:PLAU:LRP1:AKT1:MYH2:YES1:ICAM1
156	Curated_gene_sets	WP_RETT_SYNDROME_CAUSING_GENES	41	13	0.00101719	0.0369085	SCN1A:SATB2:SYNGAP1:HIVEP2:SRRM3:TRRAP:SMARCA2:GABBR2:STXBP1:NCOR2:SYNE2:GNAO1:TCF4
157	Curated_gene_sets	PID_PTP1B_PATHWAY	51	15	0.00103252	0.0372569	FGR:LCK:PRLR:PIK3R1:FER:FYN:LEP:BLK:NOX4:AKT1:ITGA2B:ITGB3:YES1:CDH2:PTPN1
158	Curated_gene_sets	BRUINS_UVC_RESPONSE_VIA_TP53_GROUP_A	805	130	0.00107202	0.0384683	PRDM16:PRDM2:CLIC4:HIVEP3:RNF220:IFI44L:RPTN:RGS8:PLA2G4A:PGBD5:AKT3:GRHL1:FBLN7:ZEB2:CSRNP3:LHFPL4:TBC1D5:OSBPL10:CNOT10:ARPP21:ITGA9:WNT5A:CD47:ZBTB20:GP9:XRN1:BCL6:LDB2:ZCCHC4:RHOH:SULT1E1:ABCG2:CLGN:SEMA5A:ANKRD33B:PRLR:PIK3R1:NUDT12:LECT2:PRELID2:PPP2R2B:GM2A:TENM2:C2:COL11A2:DST:ECT2L:COBL:LAT2:HIPK2:DEFB1:TUSC3:PNOC:PDE7A:SPAG1:GPIHBP1:GLDC:PTPRD:ENTPD2:MYO3A:BICC1:EGR2:COL13A1:CPXM2:CALY:…
159	Curated_gene_sets	GU_PDEF_TARGETS_UP	67	18	0.00110938	0.0395903	COL5A2:COL6A3:WNT5A:LEF1:CDH18:PTK2:COL13A1:PLCE1:DOCK1:COL4A1:COL4A2:HIF1A:SMAD3:PRKCA:CDH2:TCF4:SERPINB7:COL6A1
160	Curated_gene_sets	PID_NETRIN_PATHWAY	32	11	0.00116485	0.0413427	PIK3R1:MAP1B:FYN:ELMO1:PTK2:DAPK1:DOCK1:MAP2K1:PITPNA:NTN1:YES1
161	Curated_gene_sets	URS_ADIPOCYTE_DIFFERENTIATION_UP	62	17	0.00117882	0.041611	PPARG:PLCD1:DGKG:PCDH7:ABCE1:MTMR12:CAP2:PTPRZ1:KCNH2:MTUS1:RXRA:PFKFB3:APLNR:ATP8A2:ADORA2B:PTPRS:LBP
162	Curated_gene_sets	BONOME_OVARIAN_CANCER_SURVIVAL_SUBOPTIMAL_DEBULKING	453	79	0.00120928	0.0424557	NADK:ICMT:ECE1:PTGER3:MARC2:NID1:DTNB:EIF2AK3:GPR39:STK39:IGFBP5:HDAC4:LRRFIP2:MAPKAPK3:WNT5A:FILIP1L:HHLA2:BST1:LIMCH1:SPARCL1:ABCG2:PIK3R1:RASA1:CCNH:NR2F1:FAM172A:TTC37:MAN2A1:YTHDC2:PCDHA9:CDYL:EHMT2:COL21A1:DST:PDSS2:REV3L:RPS6KA2:IQCE:SRRT:CAV2:PTPRN2:TNKS:PSD3:RUNX1T1:PTPRD:GNE:STOM:CSGALNACT2:COL13A1:CCSER2:PKP3:IGF2:ZBTB16:EPS8:SMAGP:RARG:ESPL1:CDK2:DCN:NDN:ADAMTSL3:PDE8A:SLC47A1:RHOT1:N…
163	Curated_gene_sets	KEGG_DILATED_CARDIOMYOPATHY	84	21	0.00123489	0.042891	ADCY3:ITGA9:CACNA2D3:ITGB5:ADCY2:SGCD:ITGA8:CACNA1C:ITGB7:SGCG:MYH7:ADCY4:ITGA2B:ITGB3:ITGB4:TPM4:CACNG8:CACNG6:TNNI3:GNAS:CACNG2
164	Curated_gene_sets	HAN_SATB1_TARGETS_UP	386	69	0.00124239	0.0429218	PDE4B:ZRANB2:MLLT11:PTGS2:KISS1:RRP15:LTBP1:QPCT:ANTXR1:EIF2AK3:ZAP70:KLF7:IGFBP5:TNS1:HDAC4:HRH1:CNOT10:CTNNB1:WNT5A:MITF:TMEM45A:PLOD2:LIMCH1:PDE4D:OSTM1:FYN:ECHDC1:AHI1:QKI:RPS6KA2:LAMB1:DNAJB6:PDGFRL:PLAT:RIMS2:GPR21:STXBP1:FAM45A:CHST15:PTPRE:SHANK2:DDX10:TMEM45B:DENND5B:NELL2:RARG:RBM19:FLT1:PCDH9:STXBP6:NEDD4:PDE8A:DCTN5:MYO1D:MBP:JAK3:MYL9:CDH4:TXNRD2:APOL3:APOL2:CYB5R3:PACSIN2:TSPO:SAMM5…
165	Curated_gene_sets	TORCHIA_TARGETS_OF_EWSR1_FLI1_FUSION_UP	242	47	0.00127633	0.0438612	PTGER3:RUSC1:NMNAT2:RGL1:LYST:AKT3:TGFA:ASB1:BBX:SCHIP1:GNB4:GP5:PCDH7:PDLIM5:DCLK2:MTMR12:LTC4S:SERPINB6:CAP2:TRIM26:TTC39B:DIP2C:OPTN:CREM:PKP3:CD59:PTPRJ:PC:CACNA1C:EPS8:CMAS:ITGB7:FGD6:GRTP1:PRKCH:TECPR2:PPP1R13B:HSD3B7:RBL2:CPNE7:ATP2A3:PPM1E:TNNI3:MAVS:MACROD2:PCBP3:TMPRSS6
166	Curated_gene_sets	WIERENGA_STAT5A_TARGETS_DN	173	36	0.00130123	0.044138	MPL:ACOT11:SELP:GCSAML:ROCK2:LOXL3:CD47:MYLK:ITGB5:GP9:BANK1:RUFY1:GFOD1:STX1A:USP20:NOTCH1:PLXDC2:SH3PXD2A:ADRA2A:MS4A3:LGALS12:UBASH3B:ACRBP:ITGB7:IRS2:DAAM1:DLK1:PLCG2:COTL1:IRF8:GP1BA:LDLRAD4:ANGPTL6:TPM4:GP6:DNAAF3
167	Curated_gene_sets	ULE_SPLICING_VIA_NOVA2	42	13	0.00130706	0.044138	CTNNA2:LRP1B:CHL1:EPHA5:EPB41L2:GRIN1:CACNA1B:ANK3:KCNMA1:TACC2:CADM1:GPHN:KCNQ2
168	Curated_gene_sets	WP_NEPHROTIC_SYNDROME	42	13	0.00130706	0.044138	SYNPO:PDSS2:LMX1B:PLCE1:PAX2:CD151:WT1:PTPRO:GPC5:MYO1E:WDR73:ITGB4:ADCK4
169	Curated_gene_sets	MARTINEZ_RESPONSE_TO_TRABECTEDIN	47	14	0.00131157	0.044138	ROR1:KIFAP3:PPARG:PTPRG:LRBA:CUX1:STK3:ADK:DOCK1:MGMT:DDX10:NCOR2:SMAD3:TIAM1
170	Curated_gene_sets	FARMER_BREAST_CANCER_BASAL_VS_LULMINAL	301	56	0.00135195	0.0447896	SLC2A5:CLIC4:STIL:TTC39A:PTGER3:LRRC8D:ANXA9:SLC19A2:CHI3L1:LBR:CAPN9:GREB1:PSME4:TCF7L1:ERBB4:GPD1L:ITGB5:SCHIP1:IGF2BP2:HS3ST1:APBB2:LRBA:GALNT7:GALNT10:PTTG1:TFAP2A:HIST1H1A:ATG5:AMD1:QKI:MPP6:BLVRA:KRT8P3:WWP1:SYBU:CDKN2A:FBP1:GABBR2:MCM10:SLC22A18:BBOX1:TMEM135:SCNN1A:ST8SIA1:LIMA1:KRT8:CORO1C:RALGAPA1:SERPINA5:MYO5C:CX3CL1:RARA:APPBP2:DSC3:TPX2:SLC2A10:CELSR1
171	Curated_gene_sets	ZHU_CMV_24_HR_DN	79	20	0.00135244	0.0447896	COL5A2:IGFBP5:XPC:MITF:MYLK:SULT1E1:CRHBP:VCAN:SERPINB6:LAMA4:HIVEP2:AHR:CXCL12:ADRA2A:CD151:IGF2:TAGLN:SGCG:TPM4:TNNI3
172	Curated_gene_sets	ACEVEDO_LIVER_CANCER_WITH_H3K9ME3_UP	119	27	0.00134703	0.0447896	AK5:WDR64:GALNT5:MITF:CCDC54:IGSF11:TMEM108:KCNMB2:LIMCH1:ANK2:FYB:ELOVL7:VCAN:LTC4S:VWDE:POU6F2:LAMB4:ODF3:MS4A3:ANGPTL5:ENOX1:NRXN3:RARA:RIT2:CRTC1:EBF4:TRPM2
173	Curated_gene_sets	SWEET_LUNG_CANCER_KRAS_DN	394	70	0.00135851	0.0447896	ID3:CLIC4:GBP2:FAM46C:RPTN:LOR:ENAH:NID1:GREM2:KLF7:IGFBP5:CLEC3B:TMEM45A:CD47:ZBTB20:KALRN:RBP1:GYG1:WWTR1:GNB4:PROM1:LIMCH1:EPHA5:ANTXR2:SPARCL1:ADH1C:ANKRD33B:CXCL14:PCDHA9:TNXB:NOTCH4:MYO6:FYN:TCF21:QKI:AHR:LAMB1:HEY1:SMARCA2:PTPRD:DENND4C:GSN:DNM1:ZMYND11:COL13A1:VCL:SORBS1:INPP5A:PRKCDBP:MS4A6A:ZBTB16:CADM1:TAGLN:MGP:TENC1:DCN:FGF9:FLT1:ANKRD10:NDN:GCOM1:MYZAP:LOXL1:NTN1:CRHR1:TCF4:CD97:TNN…
174	Curated_gene_sets	CHIARADONNA_NEOPLASTIC_TRANSFORMATION_CDC25_UP	102	24	0.00143669	0.0471277	CHI3L1:ENAH:NID1:GREM2:PHLDB2:IGSF10:VCAN:MAN2A1:SYNPO:ADAM19:LAMA4:SMOC2:SRRT:CTSB:ANK3:FGFR2:LSP1:IGF2:NAV2:MGP:LMO7:DLK1:LOXL1:IMPACT
175	Curated_gene_sets	ALCALAY_AML_BY_NPM1_LOCALIZATION_DN	174	36	0.00144769	0.0472501	MECR:RRM2:FKBP1B:ITGA9:PROM1:IGFBP7:STAP1:ABCG2:BANK1:NNT:CRHBP:PTTG1:SERPINB6:HLA-DMA:KIFC1:RPS6KA2:HGF:ABCB1:MDFIC:CSGALNACT1:ANK1:BAALC:GSN:STOM:MCM10:EPS8:PLXNC1:TESC:POLE:DAAM1:PAK6:PITPNC1:SEPT9:B4GALT6:GNG7:TPX2
176	Curated_gene_sets	KAAB_HEART_ATRIUM_VS_VENTRICLE_UP	231	45	0.00149924	0.0486879	PDE4B:GJA5:RABGAP1L:NMNAT2:RTN4:MAL:ERBB4:CHL1:FBLN2:PRKCD:CADPS:CD47:MYLK:RBP1:TNK2:AFAP1:FAM114A1:MAP1B:VCAN:NR2F1:FAM172A:SYNPO:SLIT3:AUTS2:RELN:PRUNE2:CACNA1B:FGFR2:SLC22A18:MICAL2:CCDC85B:TAGLN:EPS8:SLC11A2:MYBPC1:TBX5:F10:GABRB3:DAPK2:PPIB:GNAO1:CCL14:CCL15-CCL14:ERBB2:TPGS2:PLCB1
177	Curated_gene_sets	SENESE_HDAC3_TARGETS_DN	484	83	0.00152706	0.0488585	LRRC47:CLIC4:EDN2:PTGFRN:NFASC:SERTAD4:NID1:EFCAB2:ROCK2:NCOA1:ANTXR1:SH3RF3:UGGT1:PKP4:COL5A2:MARCH4:TNS1:RBMS3:LIMD1:NISCH:MITF:VGLL3:TMEM45A:BBX:GAP43:PCDH7:LIMCH1:PGRMC2:CXCL14:SYNPO:DCTN4:GALNT10:TENM2:PPP1R14C:LFNG:ZNF853:LAT2:BAIAP2L1:MDFIC:ESCO2:PLEKHA2:RIMS2:GNE:DNM1:CASC10:NANOS1:HSD17B12:EXT2:FIBP:CHKA:TAGLN:C2CD5:PKP2:NCOR2:ITGBL1:ZNF219:STXBP6:RIN3:CCDC85C:GABRB3:ANP32A:FAH:FBXL16:AA…
178	Curated_gene_sets	REACTOME_O_LINKED_GLYCOSYLATION_OF_MUCINS	58	16	0.00151657	0.0488585	GALNT2:GALNT13:GALNT5:GALNT15:MUC4:GALNT7:GALNT10:MUC12:MUC17:RN7SKP54:MUC6:MUC5B:GALNT9:B3GNT9:ST3GAL2:B4GALT6:MUC16
179	Curated_gene_sets	DAVICIONI_TARGETS_OF_PAX_FOXO1_FUSIONS_UP	244	47	0.00152331	0.0488585	ID3:KCNN3:CREG1:PRRX1:NFASC:NID1:KCNS3:ALK:LTBP1:TCF7L1:NRP2:CUL3:PCDH7:ANK2:FBN2:GALNT10:ADAM19:SPDL1:SUPT3H:SGK1:DPY19L1:AUTS2:CAV2:ANK1:PLAT:SULF1:EYA1:PAX5:MED27:NEBL:CREM:PLAU:WBP1L:PTPRE:NELL1:DTX4:CADM1:PLXNC1:IRS2:DICER1:MEG3:PRKCA:TPM4:CDH4:ADAMTS1:COL18A1:ADRBK2
180	Curated_gene_sets	MARTINEZ_RB1_AND_TP53_TARGETS_UP	567	95	0.00155651	0.0495566	NADK:PTGFR:GBP2:RPTN:MTX1:UAP1:PTGS2:TMCC2:PTPN14:QPCT:PSME4:RTN4:MAP2:CHRND:ITGA9:PTPRG:TMEM45A:TF:ESYT3:KLB:PDLIM5:ADH1C:CASP6:ZFR:NDUFS4:MAP1B:ZBED3:RNF14:DCTN4:PTTG1:TMED9:LTC4S:SERPINB1:RANBP9:HLA-B:AMD1:QKI:SMOC2:PRKAR1B:BRAT1:FSCN1:AHR:TFPI2:PILRA:CLDN15:HBP1:CAV2:PTPRZ1:LEP:AGK:ABCB8:CTSB:HNF4G:RAD21:SPIN1:STOM:RABGAP1:RXRA:PFKFB3:ITIH5:CELF2:FAM107B:CXCL12:PSAP:SORBS1:FGFR2:IGF2:CARS:BBO…

## Sheet: common meth
	Category	GeneSet	N_genes	N_overlap	p	adjP	genes	link
ACEVEDO_LIVER_CANCER_WITH_H3K27ME3_DN	Curated_gene_sets	ACEVEDO_LIVER_CANCER_WITH_H3K27ME3_DN	148	32	0.001218	0.0425318	IGSF3:LYST:RAPGEF4:SATB2:PP2D1:GP5:PCDHGB3:PCDHGA6:PCDHGA7:PCDHGB4:PCDHGA8:PCDHGA9:PCDHGB6:PCDHGA10:PCDHGB7:PCDHGA11:KCNIP1:CDKN2A:CHST15:NUCB2:TMEM132C:ATP8A2:COCH:TTC9:ADAMTSL3:NTRK3:ANKRD29:DTNA:PPP1R16B:TSHZ2:COL18A1:APOL2	http://www.gsea-msigdb.org/gsea/msigdb/human/geneset/ACEVEDO_LIVER_CANCER_WITH_H3K27ME3_DN
ACEVEDO_METHYLATED_IN_LIVER_CANCER_DN	Curated_gene_sets	ACEVEDO_METHYLATED_IN_LIVER_CANCER_DN	698	131	8.22578e-07	0.000148407	AJAP1:CAMTA1:TNFRSF8:EPHA8:LUZP1:MKNK1:GLIS1:AK5:LOR:OR10K1:RGS13:NAV1:NFASC:TMCC2:WDR26:OBSCN:DISC1:OR2L13:TPO:SLC3A1:ZAP70:KIF5C:HOXD13:OR6B2:HRH1:FGD5:FOXP1:CD86:KALRN:NMNAT3:CLSTN2:TRIM42:SSR3:KCNMB2:DGKG:MUC4:JAKMIP1:PPP2R2C:LIMCH1:NPFFR2:TSPAN5:ANK2:FAM160A1:DCHS2:GALNT7:ASB5:SLC6A19:SLC6A18:EGFLAM:FYB:MCC:PKD2L2:PCDHA11:PCDHA13:PCDHGA2:TENM2:RASGEF1C:F13A1:COL9A1:FILIP1:FHL5:FYN:AHI1:ADGB:…	http://www.gsea-msigdb.org/gsea/msigdb/human/geneset/ACEVEDO_METHYLATED_IN_LIVER_CANCER_DN
BENPORATH_EED_TARGETS	Curated_gene_sets	BENPORATH_EED_TARGETS	935	171	1.05392e-07	2.97619e-05	TP73:LRRC47:IGSF21:PAX7:ARID1A:GRIK3:RSPO1:YRDC:COL9A2:FOXD2:WLS:PTGER3:LHX8:PTGFR:GFI1:ASTN1:FAM163A:WNT3A:TRIM67:SLC35F3:TGFA:VAX2:ATOH8:CD8A:MAL:INPP4A:FBLN7:ZEB2:HOXD13:TMEFF2:ERBB4:SGPP2:SLCO2A1:ESYT3:CLSTN2:DGKG:SORCS2:GABRA4:IGFBP7:EPHA5:FGF5:SCD5:PCDH10:DCLK2:DCHS2:SPOCK3:SLC9A3:CTNND2:CRHBP:FBN2:CXCL14:NRG2:GALNT10:EBF1:HIST1H3A:HIST1H3B:HIST1H3C:HIST1H3D:HIST1H3E:HIST1H3F:HIST1H3G:HIST1…	http://www.gsea-msigdb.org/gsea/msigdb/human/geneset/BENPORATH_EED_TARGETS
BENPORATH_ES_WITH_H3K27ME3	Curated_gene_sets	BENPORATH_ES_WITH_H3K27ME3	1007	202	1.70587e-12	5.53982e-09	TP73:TNFRSF1B:IGSF21:PAX7:CSMD2:GRIK3:RSPO1:COL9A2:FOXD2:PTGER3:LHX8:PTGFR:BCAN:ASTN1:FAM163A:CR2:WNT3A:TRIM67:SLC35F3:KCNS3:DTNB:NRXN1:TGFA:VAX2:ATOH8:CD8A:MAL:FBLN7:CNTNAP5:ZEB2:KCNH7:RAPGEF4:HOXD13:TMEFF2:SATB2:ERBB4:SGPP2:RAMP1:GPD1L:CD47:SLCO2A1:CLSTN2:DGKG:GABRA4:CWH43:EPHA5:FGF5:SCD5:LEF1:DCLK2:LRBA:DCHS2:SPOCK3:SLC9A3:CTNND2:EGFLAM:FBN2:CXCL14:NRG2:CDX1:EBF1:SLIT3:RASGEF1C:HLA-B:ETV7:LRFN…	http://www.gsea-msigdb.org/gsea/msigdb/human/geneset/BENPORATH_ES_WITH_H3K27ME3
BENPORATH_PRC2_TARGETS	Curated_gene_sets	BENPORATH_PRC2_TARGETS	588	118	8.13896e-08	2.40284e-05	TP73:IGSF21:PAX7:GRIK3:RSPO1:COL9A2:FOXD2:PTGER3:LHX8:PTGFR:ASTN1:FAM163A:WNT3A:TRIM67:SLC35F3:VAX2:ATOH8:CD8A:MAL:FBLN7:ZEB2:HOXD13:TMEFF2:ERBB4:SGPP2:SLCO2A1:CLSTN2:DGKG:GABRA4:EPHA5:FGF5:SCD5:DCLK2:DCHS2:SPOCK3:SLC9A3:CTNND2:FBN2:CXCL14:NRG2:DGKI:CSMD1:GATA4:NEFM:SLCO5A1:HEY1:GDF6:RSPO2:CSMD3:FBP1:LPPR1:PAPPA:ASTN2:LMX1B:CACNA1B:ADARB2:SPAG6:PRKG1:KCNMA1:SLIT1:PAX2:SORCS3:SORCS1:ADRA2A:SPON1:N…	http://www.gsea-msigdb.org/gsea/msigdb/human/geneset/BENPORATH_PRC2_TARGETS
BENPORATH_SUZ12_TARGETS	Curated_gene_sets	BENPORATH_SUZ12_TARGETS	898	179	5.87862e-11	7.63633e-08	TP73:TNFRSF1B:IGSF21:PAX7:GRIK3:RSPO1:YRDC:COL9A2:FOXD2:WLS:PTGER3:LHX8:PTGFR:GFI1:FAM46C:ASTN1:FAM163A:WNT3A:TRIM67:SLC35F3:VAX2:ATOH8:CD8A:MAL:FBLN7:ZEB2:RAPGEF4:HOXD13:TMEFF2:ERBB4:IGFBP5:SGPP2:SLCO2A1:ESYT3:CLSTN2:DGKG:TBC1D1:GABRA4:CWH43:EPHA5:FGF5:SCD5:LEF1:DCLK2:DCHS2:SPOCK3:SLC9A3:CTNND2:EGFLAM:CRHBP:RASGRF2:FBN2:CXCL14:NRG2:CAV2:DGKI:DPP6:VIPR2:CSMD1:GATA4:DLC1:NEFM:HTRA4:SDR16C5:SLCO5A1…	http://www.gsea-msigdb.org/gsea/msigdb/human/geneset/BENPORATH_SUZ12_TARGETS
DAVICIONI_MOLECULAR_ARMS_VS_ERMS_UP	Curated_gene_sets	DAVICIONI_MOLECULAR_ARMS_VS_ERMS_UP	308	64	2.40957e-05	0.00274564	KCNN3:PGBD5:DISC1:AKT3:NCOA1:ALK:PKP4:RAPGEF4:SATB2:KLF7:CUL3:LRRFIP2:CD47:TAGLN3:ADRA2C:QDPR:ANK2:SEMA5A:NNT:CCNH:CDYL:TFAP2A:JARID2:DST:ASCC3:PCMT1:ELMO1:COBL:POR:MAGI2:VIPR2:DLGAP2:CHD7:KDM4C:PTPRD:GNE:PAX5:DAPK1:CDC14B:LPPR1:ASTN2:NOTCH1:NET1:SGMS1:ADK:PAX2:ADRA2A:FGFR2:NELL1:DOCK9:SAMD4A:SYNE2:GREM1:RYR3:MYO1E:NTRK3:WWOX:FAM64A:TTC19:TEX2:BLCAP:EYA2:ABCG1:COL18A1	http://www.gsea-msigdb.org/gsea/msigdb/human/geneset/DAVICIONI_MOLECULAR_ARMS_VS_ERMS_UP
DAWSON_METHYLATED_IN_LYMPHOMA_TCL1	Curated_gene_sets	DAWSON_METHYLATED_IN_LYMPHOMA_TCL1	55	16	0.000811557	0.0310063	AJAP1:PKP4:STK39:HOXD13:OSBPL6:PCDH10:NRSN1:CLVS2:AUTS2:TMEM229A:RUNX1T1:PTPRD:CDKN2A:EGR2:MDGA2:MDGA2:MACROD2	http://www.gsea-msigdb.org/gsea/msigdb/human/geneset/DAWSON_METHYLATED_IN_LYMPHOMA_TCL1
GRYDER_PAX3FOXO1_ENHANCERS_IN_TADS	Curated_gene_sets	GRYDER_PAX3FOXO1_ENHANCERS_IN_TADS	942	170	2.84121e-07	6.59059e-05	RERE:ARID1A:RRAGC:FAF1:PGM1:DNTTIP2:PTGFRN:KCNN3:PIGC:NAV1:RRP15:ENAH:GALNT2:PGBD5:KCNS3:HS1BP3:NCOA1:WDR43:ALK:MSH6:VAX2:TCF7L1:ATOH8:ST6GAL2:ZEB2:SATB2:NRP2:CUL3:AGAP1:LRRFIP1:SUMF1:LMCD1:LRRFIP2:LIMD1:FOXP1:VGLL3:PHLDB2:TAGLN3:XRN1:IGF2BP2:AFAP1:TBC1D1:APBB2:LIMCH1:ANTXR2:WDFY3:ANK2:PGRMC2:SPOCK3:NDUFS4:SLC38A9:MSH3:RGMB:MAN2A1:MCC:H2AFY:ADAM19:SPDL1:NPM1:CDYL:FARS2:JARID2:ATXN1:ZFAND3:ASCC3:R…	http://www.gsea-msigdb.org/gsea/msigdb/human/geneset/GRYDER_PAX3FOXO1_ENHANCERS_IN_TADS
LIM_MAMMARY_STEM_CELL_UP	Curated_gene_sets	LIM_MAMMARY_STEM_CELL_UP	439	96	1.94658e-08	8.11144e-06	LUZP1:COL9A2:PRRX1:PTGS2:LGR6:AKT3:ANTXR1:TCF7L1:FBLN7:LIMS2:OSBPL6:COL5A2:NRP2:TNS1:HDAC4:ITGA9:PCBP4:PRICKLE2:FOXP1:VGLL3:MYLK:MBNL1:SCHIP1:GNB4:SH3TC1:PCDH7:SEMA5A:VCAN:CXCL14:PPP2R2B:SLIT3:PDLIM7:COL23A1:DST:PRDM1:AHI1:QKI:RELN:LAMB1:LEP:RBPMS:SULF1:MTSS1:MAMDC2:SVEP1:GSN:CCDC3:NRP1:EGR2:KCNMA1:SORBS1:SORCS1:PTPRE:EBF3:MICAL2:CCDC85B:MRGPRF:ARHGAP20:CADM1:TAGLN:NTF3:LIMA1:GRASP:LRP1:COL4A1:CO…	http://www.gsea-msigdb.org/gsea/msigdb/human/geneset/LIM_MAMMARY_STEM_CELL_UP
MANALO_HYPOXIA_UP	Curated_gene_sets	MANALO_HYPOXIA_UP	187	43	4.47512e-05	0.0042744	SPSB1:PGM1:GJA5:NFASC:OPN3:TCF7L1:TNS1:PPARG:FILIP1L:TMEM45A:PLOD2:BCL6:AFAP1:LIMCH1:SORBS2:SYNPO:ATXN1:HLA-B:NOTCH4:COL9A1:ZNF292:HIVEP2:RPS6KA2:CLIP2:LAMB1:STC1:SLCO5A1:ZHX2:MTSS1:CELF2:GDF10:CHST15:USP47:PTPRR:COL4A1:COL4A2:CX3CL1:PLCG2:CDH2:AXL:PPP1R13L:DLGAP4:COL18A1	http://www.gsea-msigdb.org/gsea/msigdb/human/geneset/MANALO_HYPOXIA_UP
MEISSNER_BRAIN_HCP_WITH_H3K4ME3_AND_H3K27ME3	Curated_gene_sets	MEISSNER_BRAIN_HCP_WITH_H3K4ME3_AND_H3K27ME3	1030	203	8.21407e-12	1.7181e-08	PRKCZ:PRDM16:IGSF21:ID3:LDLRAP1:MAP3K6:GRIK3:RSPO1:RNF220:STIL:GLIS1:ROR1:PTGER3:SLC44A5:RHBG:BCAN:FAM163A:SYT2:SOX13:PTPN14:DISC1:PLD5:TRIM58:FAM110C:SNTG2:RRM2:KCNS3:ATOH8:MAL:FBLN7:DPP10:C1QL2:SATB2:FZD5:IGFBP5:SNED1:HRH1:FBLN2:CMTM7:ITGA9:WNT5A:PHLDB2:ITGB5:TMEM108:SLCO2A1:ESYT3:PLOD2:WWTR1:IGF2BP2:ADRA2C:SORCS2:PROM1:CORIN:CWH43:IGFBP7:ANTXR2:PRDM8:FGF5:PDLIM5:LEF1:SLC9A3:ANKRD33B:EGFLAM:RAS…	http://www.gsea-msigdb.org/gsea/msigdb/human/geneset/MEISSNER_BRAIN_HCP_WITH_H3K4ME3_AND_H3K27ME3
MEISSNER_NPC_HCP_WITH_H3K4ME2	Curated_gene_sets	MEISSNER_NPC_HCP_WITH_H3K4ME2	456	85	8.68479e-05	0.00723176	VWA1:AGBL4:TTC39A:SLC44A5:LGR6:SERTAD4:SLC35F3:ADCY3:MARCH4:LHFPL4:HRH1:FBLN2:PRICKLE2:RAB43:FGF12:PRDM8:PRKG2:PCDHAC1:SLIT3:NSD1:COL23A1:RNF144B:LMTK2:DPP6:VIPR2:PLEKHA2:ANK1:SLCO5A1:FZD6:SEMA4D:LMX1B:DNM1:OLFM1:CACNA1B:NET1:CCDC3:KIAA1217:GDF10:TLL2:CPXM2:PTPRE:TCERG1L:BRSK2:KCNJ8:PKP2:SMAGP:RASAL1:SRRM4:GLT1D1:SMAD9:DNAJC15:GRTP1:DLK1:OTUD7A:ANXA2:DAPK2:PDE8A:ALDH1A3:DOC2A:FA2H:ADAMTS18:IRF8:A…	http://www.gsea-msigdb.org/gsea/msigdb/human/geneset/MEISSNER_NPC_HCP_WITH_H3K4ME2
MEISSNER_NPC_HCP_WITH_H3K4ME2_AND_H3K27ME3	Curated_gene_sets	MEISSNER_NPC_HCP_WITH_H3K4ME2_AND_H3K27ME3	333	81	1.65343e-09	1.34238e-06	PRDM16:TP73:IGSF21:GRIK3:RSPO1:PTGER3:LHX8:PTGFRN:SYT2:WNT3A:PGBD5:GNG4:PLD5:KCNS3:ALK:MAL:ST6GAL2:DPP10:C1QL2:GALNT13:HOXD13:SGPP2:CADPS:CLSTN2:ADRA2C:PPP2R2C:GABRB1:FAM47E-STBD1:CLGN:EGFLAM:ANKRD34B:CXCL14:RASGEF1C:SMOC2:AHR:COBL:BAIAP2L1:PTPRN2:DLGAP2:UNC5D:SNTG1:GABBR2:PAPPA:CHAT:COL13A1:PAX2:SORCS3:VWA2:IGF2:SYT12:DSCAML1:OAF:WSCD2:HRK:TESC:GABRA5:GABRG3:CDH8:CA7:SPIRE2:RAB11FIP4:IKZF3:CRHR1…	http://www.gsea-msigdb.org/gsea/msigdb/human/geneset/MEISSNER_NPC_HCP_WITH_H3K4ME2_AND_H3K27ME3
MIKKELSEN_IPS_WITH_HCP_H3K27ME3	Curated_gene_sets	MIKKELSEN_IPS_WITH_HCP_H3K27ME3	97	26	0.000103043	0.00806343	GFI1:HOXD10:FGF12:PRDM8:SLC25A31:TMEM174:PCDHA2:PCDHA3:PCDHA4:PCDHA10:PCDHA11:PCDHA13:KCNIP1:TFAP2D:GRM8:KCNK9:PAPPA:SORCS3:IGF2:NPAS4:NTM:LRRK2:HOXC8:TBX5:ASIC2:CA10:NFIX:CACNG2	http://www.gsea-msigdb.org/gsea/msigdb/human/geneset/MIKKELSEN_IPS_WITH_HCP_H3K27ME3
MIKKELSEN_MCV6_HCP_WITH_H3K27ME3	Curated_gene_sets	MIKKELSEN_MCV6_HCP_WITH_H3K27ME3	415	92	1.92755e-08	8.11144e-06	TP73:PTCHD2:IGSF21:EPHA8:RSPO1:COL9A2:AK5:NHLH2:BCAN:FAM163A:SYT2:WNT3A:SLC35F3:TRIM58:SH3RF3:DPP10:C1QL2:RAMP1:KLHL40:CACNA2D3:CLSTN2:GNB4:FGF12:ADRA2C:GABRA4:FGF5:CLGN:SLC9A3:FSTL4:CXCL14:PCDHAC2:RASGEF1C:GRM1:RELN:KCNH2:DLGAP2:GATA4:NEIL2:ANK1:GLDC:GABBR2:LMX1B:KCNT1:LHX3:CHAT:COL13A1:KCNMA1:SLIT1:PAX2:TCERG1L:BRSK2:SPON1:NELL1:NRXN2:ZBTB16:OAF:NELL2:TRHDE:WSCD2:TBX5:ATP8A2:NPAS3:GABRA5:PDE8A:…	http://www.gsea-msigdb.org/gsea/msigdb/human/geneset/MIKKELSEN_MCV6_HCP_WITH_H3K27ME3
MIKKELSEN_MEF_HCP_WITH_H3_UNMETHYLATED	Curated_gene_sets	MIKKELSEN_MEF_HCP_WITH_H3_UNMETHYLATED	184	50	5.44798e-08	1.68498e-05	VWA1:SLC2A5:IL12RB2:OLFM3:SYNPR:IL20RB:SLC25A31:PCDHA1:PCDHA2:PCDHA3:PCDHA4:PCDHA5:PCDHA6:PCDHA7:PCDHA9:PCDHA10:PCDHA11:PCDHA12:PCDHA13:PCDHAC1:PCDHB5:NSD1:NRSN1:CLVS2:CNTNAP2:DPP6:HTR5A:EPPK1:GSN:SPAG6:PLCE1:NPAS4:CCDC67:ACRBP:ZNF385A:NOS1:PIWIL1:LTB4R:TRPM1:DPEP3:NLGN2:SOX15:RCVRN:KRT26:GFAP:HSF5:DLGAP1:ZNF516:JAK3:KLK10:COL9A3:CACNG2	http://www.gsea-msigdb.org/gsea/msigdb/human/geneset/MIKKELSEN_MEF_HCP_WITH_H3_UNMETHYLATED
MIKKELSEN_MEF_HCP_WITH_H3K27ME3	Curated_gene_sets	MIKKELSEN_MEF_HCP_WITH_H3K27ME3	566	124	1.46603e-10	1.58698e-07	PRKCZ:PTCHD2:IGSF21:PAX7:EPHA8:GRIK3:RSPO1:GFI1:NHLH2:BCAN:ASTN1:FAM163A:IRF6:WNT3A:SLC35F3:ALK:MAL:DPP10:C1QL2:KCNH7:RAPGEF4:MARCH4:LHFPL4:HRH1:FGF12:ADRA2C:PPP2R2C:CWH43:PRDM8:SLC9A3:PRLR:TMEM174:CRHBP:FSTL4:HTR4:CDX1:KCNIP1:PFN3:RASGEF1C:TNXB:TFAP2D:TCF21:GRM1:NXPH1:TBX20:VSTM2A:SLC26A5:RELN:TMEM229A:PTPRN2:DLGAP2:CSMD1:GRHL2:DPYS:FBP1:KCNT1:LHX3:SPAG6:CHAT:SLIT1:SORCS3:CPXM2:TCERG1L:BRSK2:NEL…	http://www.gsea-msigdb.org/gsea/msigdb/human/geneset/MIKKELSEN_MEF_HCP_WITH_H3K27ME3
MIKKELSEN_NPC_HCP_WITH_H3K27ME3	Curated_gene_sets	MIKKELSEN_NPC_HCP_WITH_H3K27ME3	327	73	4.14685e-07	8.95176e-05	PRKCZ:PRDM16:TP73:TNFRSF1B:IGSF21:PAX7:EPHA8:GRIK3:RSPO1:LHX8:GFI1:SYT2:WNT3A:PGBD5:KCNS3:ALK:MAL:DPP10:C1QL2:GALNT13:HOXD10:SGPP2:CLSTN2:ADRA2C:PPP2R2C:FAM47E-STBD1:FSTL4:CXCL14:RASGEF1C:TFAP2D:COBL:DLGAP2:PAPPA:GRIN1:CHAT:COL13A1:SORCS3:VWA2:TCERG1L:IGF2:NELL1:SYT12:DSCAML1:HOXC8:FOXN4:FGF14:GABRA5:GABRG3:SCNN1G:CDH8:CA7:PITPNM3:RAB11FIP4:IKZF3:CRHR1:IGF2BP1:CA10:LLGL2:RBFOX3:COLEC12:ST8SIA3:HC…	http://www.gsea-msigdb.org/gsea/msigdb/human/geneset/MIKKELSEN_NPC_HCP_WITH_H3K27ME3
REACTOME_NEUREXINS_AND_NEUROLIGINS	Curated_gene_sets	REACTOME_NEUREXINS_AND_NEUROLIGINS	50	23	5.32043e-09	3.14147e-06	SYT2:NRXN1:LRRTM4:PDLIM5:EPB41L2:GRM1:STX1A:DLGAP2:STXBP1:GRIN1:SYT7:NRXN2:SYT12:SHANK2:DLG2:SYT1:SIPA1L1:NRXN3:BEGAIN:NLGN2:DLGAP1:SHANK1:DLGAP4	http://www.gsea-msigdb.org/gsea/msigdb/human/geneset/REACTOME_NEUREXINS_AND_NEUROLIGINS
REACTOME_NEURONAL_SYSTEM	Curated_gene_sets	REACTOME_NEURONAL_SYSTEM	373	85	1.77937e-08	8.11144e-06	GRIK3:KCNN3:SYT2:GNG4:KCNS3:ADCY3:NRXN1:LRRTM4:KCNH7:CHRNA1:ERBB4:PRKAG3:CHRND:CHRNG:CACNA2D3:KCNMB2:KCNMB3:GNB4:GABRA4:GABRB1:PDLIM5:ADCY2:RASGRF2:GABRA6:GABBR1:LRFN2:KCNQ5:MYO6:EPB41L2:GRM1:RPS6KA2:PRKAR1B:STX1A:KCNH2:DLGAP2:CHRNA2:KCNK9:PTPRD:GABBR2:STXBP1:GRIN1:CACNA1B:CHAT:KCNMA1:SYT7:NRXN2:SYT12:SHANK2:DLG2:SLC6A12:KCNJ8:PPFIBP1:TUBA1B:KCNH3:SYT1:PPFIA2:ADCY4:SIPA1L1:NRXN3:BEGAIN:GABRB3:GAB…	http://www.gsea-msigdb.org/gsea/msigdb/human/geneset/REACTOME_NEURONAL_SYSTEM
REACTOME_PROTEIN_PROTEIN_INTERACTIONS_AT_SYNAPSES	Curated_gene_sets	REACTOME_PROTEIN_PROTEIN_INTERACTIONS_AT_SYNAPSES	76	30	2.44687e-09	1.58924e-06	SYT2:NRXN1:LRRTM4:PDLIM5:LRFN2:EPB41L2:GRM1:STX1A:DLGAP2:PTPRD:STXBP1:GRIN1:SYT7:NRXN2:SYT12:SHANK2:DLG2:PPFIBP1:SYT1:PPFIA2:SIPA1L1:NRXN3:BEGAIN:NTRK3:NLGN2:DLGAP1:PTPRS:PPFIA3:SHANK1:DLGAP4	http://www.gsea-msigdb.org/gsea/msigdb/human/geneset/REACTOME_PROTEIN_PROTEIN_INTERACTIONS_AT_SYNAPSES
REACTOME_REGULATION_OF_COMMISSURAL_AXON_PATHFINDING_BY_SLIT_AND_ROBO	Curated_gene_sets	REACTOME_REGULATION_OF_COMMISSURAL_AXON_PATHFINDING_BY_SLIT_AND_ROBO	10	6	0.000501774	0.0217533	ROBO2:SLIT3:SLIT1:ROBO3:NELL2:NTN1	http://www.gsea-msigdb.org/gsea/msigdb/human/geneset/REACTOME_REGULATION_OF_COMMISSURAL_AXON_PATHFINDING_BY_SLIT_AND_ROBO
REACTOME_TRANSMISSION_ACROSS_CHEMICAL_SYNAPSES	Curated_gene_sets	REACTOME_TRANSMISSION_ACROSS_CHEMICAL_SYNAPSES	241	48	0.000646994	0.025889	GRIK3:GNG4:ADCY3:CHRNA1:ERBB4:PRKAG3:CHRND:CHRNG:CACNA2D3:GNB4:GABRA4:GABRB1:ADCY2:RASGRF2:GABRA6:GABBR1:MYO6:RPS6KA2:PRKAR1B:STX1A:CHRNA2:GABBR2:STXBP1:GRIN1:CACNA1B:CHAT:DLG2:SLC6A12:TUBA1B:SYT1:PPFIA2:ADCY4:GABRB3:GABRA5:GABRG3:GIT1:PPM1E:PRKCA:GNG7:PPFIA3:PRKCG:CACNG8:PLCB1:CHRNA4:GRIK1:COMT:SYN3:CACNG2	http://www.gsea-msigdb.org/gsea/msigdb/human/geneset/REACTOME_TRANSMISSION_ACROSS_CHEMICAL_SYNAPSES
